# Supplementary material
Source: publisher figshare collection journal article supplement (https://acs.figshare.com/ndownloader/files/5091793)
Supplement: Supplementary file 1 [file 5091793]

HEADER    Model of E2 conformer of gastric H+/K+-ATPase  
MODEL        1
ATOM      1  N   MET     1      -0.080  79.450  17.610  1.00  0.00
ATOM      2  HN1 MET     1       0.260  80.250  17.090  1.00  0.00
ATOM      3  HN2 MET     1      -0.730  78.920  17.040  1.00  0.00
ATOM      4  HN3 MET     1      -0.550  79.760  18.450  1.00  0.00
ATOM      5  CA  MET     1       1.060  78.580  17.980  1.00  0.00
ATOM      6  CB  MET     1       0.570  77.350  18.760  1.00  0.00
ATOM      7  CG  MET     1       0.060  77.650  20.180  1.00  0.00
ATOM      8  SD  MET     1      -1.510  78.550  20.300  1.00  0.00
ATOM      9  CE  MET     1      -0.780  80.210  20.330  1.00  0.00
ATOM     10  C   MET     1       1.760  78.110  16.750  1.00  0.00
ATOM     11  O   MET     1       2.230  78.910  15.950  1.00  0.00
ATOM     12  N   GLY     2       1.840  76.780  16.570  1.00  0.00
ATOM     13  HN  GLY     2       1.450  76.150  17.260  1.00  0.00
ATOM     14  CA  GLY     2       2.480  76.270  15.400  1.00  0.00
ATOM     15  C   GLY     2       1.990  74.880  15.200  1.00  0.00
ATOM     16  O   GLY     2       1.290  74.330  16.050  1.00  0.00
ATOM     17  N   LYS     3       2.350  74.270  14.060  1.00  0.00
ATOM     18  HN  LYS     3       2.930  74.770  13.390  1.00  0.00
ATOM     19  CA  LYS     3       1.930  72.940  13.790  1.00  0.00
ATOM     20  CB  LYS     3       2.280  72.460  12.370  1.00  0.00
ATOM     21  CG  LYS     3       1.460  73.140  11.280  1.00  0.00
ATOM     22  CD  LYS     3      -0.040  72.850  11.380  1.00  0.00
ATOM     23  CE  LYS     3      -0.420  71.440  10.900  1.00  0.00
ATOM     24  NZ  LYS     3      -1.860  71.200  11.120  1.00  0.00
ATOM     25  HZ1 LYS     3      -2.080  71.280  12.110  1.00  0.00
ATOM     26  HZ2 LYS     3      -2.400  71.890  10.600  1.00  0.00
ATOM     27  HZ3 LYS     3      -2.100  70.270  10.800  1.00  0.00
ATOM     28  C   LYS     3       2.630  72.050  14.760  1.00  0.00
ATOM     29  O   LYS     3       3.800  72.260  15.070  1.00  0.00
ATOM     30  N   ALA     4       1.910  71.050  15.280  1.00  0.00
ATOM     31  HN  ALA     4       0.940  70.930  15.020  1.00  0.00
ATOM     32  CA  ALA     4       2.510  70.160  16.220  1.00  0.00
ATOM     33  CB  ALA     4       1.510  69.270  16.970  1.00  0.00
ATOM     34  C   ALA     4       3.410  69.250  15.440  1.00  0.00
ATOM     35  O   ALA     4       3.140  68.910  14.290  1.00  0.00
ATOM     36  N   GLU     5       4.540  68.850  16.070  1.00  0.00
ATOM     37  HN  GLU     5       4.750  69.210  16.990  1.00  0.00
ATOM     38  CA  GLU     5       5.420  67.930  15.430  1.00  0.00
ATOM     39  CB  GLU     5       6.860  67.990  15.970  1.00  0.00
ATOM     40  CG  GLU     5       7.560  69.310  15.650  1.00  0.00
ATOM     41  CD  GLU     5       8.970  69.270  16.210  1.00  0.00
ATOM     42  OE1 GLU     5       9.320  68.250  16.850  1.00  0.00
ATOM     43  OE2 GLU     5       9.720  70.260  15.990  1.00  0.00
ATOM     44  C   GLU     5       4.840  66.580  15.670  1.00  0.00
ATOM     45  O   GLU     5       4.070  66.390  16.600  1.00  0.00
ATOM     46  N   ASN     6       5.190  65.600  14.810  1.00  0.00
ATOM     47  HN  ASN     6       5.860  65.770  14.080  1.00  0.00
ATOM     48  CA  ASN     6       4.580  64.310  14.970  1.00  0.00
ATOM     49  CB  ASN     6       4.220  63.640  13.640  1.00  0.00
ATOM     50  CG  ASN     6       3.530  62.320  13.950  1.00  0.00
ATOM     51  OD1 ASN     6       4.160  61.260  13.980  1.00  0.00
ATOM     52  ND2 ASN     6       2.190  62.380  14.220  1.00  0.00
ATOM     53 HD22 ASN     6       1.710  63.270  14.190  1.00  0.00
ATOM     54 HD21 ASN     6       1.680  61.540  14.440  1.00  0.00
ATOM     55  C   ASN     6       5.510  63.400  15.700  1.00  0.00
ATOM     56  O   ASN     6       6.730  63.500  15.590  1.00  0.00
ATOM     57  N   TYR     7       4.920  62.490  16.490  1.00  0.00
ATOM     58  HN  TYR     7       3.910  62.510  16.590  1.00  0.00
ATOM     59  CA  TYR     7       5.650  61.490  17.210  1.00  0.00
ATOM     60  CB  TYR     7       5.430  61.530  18.730  1.00  0.00
ATOM     61  CG  TYR     7       6.400  60.600  19.370  1.00  0.00
ATOM     62  CD1 TYR     7       7.660  61.040  19.690  1.00  0.00
ATOM     63  CD2 TYR     7       6.060  59.290  19.650  1.00  0.00
ATOM     64  CE1 TYR     7       8.570  60.190  20.290  1.00  0.00
ATOM     65  CE2 TYR     7       6.970  58.440  20.240  1.00  0.00
ATOM     66  CZ  TYR     7       8.220  58.900  20.570  1.00  0.00
ATOM     67  OH  TYR     7       9.160  58.030  21.180  1.00  0.00
ATOM     68  HH  TYR     7       8.760  57.170  21.300  1.00  0.00
ATOM     69  C   TYR     7       5.080  60.210  16.700  1.00  0.00
ATOM     70  O   TYR     7       3.880  60.120  16.430  1.00  0.00
ATOM     71  N   GLU     8       5.920  59.170  16.530  1.00  0.00
ATOM     72  HN  GLU     8       6.890  59.230  16.790  1.00  0.00
ATOM     73  CA  GLU     8       5.380  57.960  15.970  1.00  0.00
ATOM     74  CB  GLU     8       6.430  56.890  15.660  1.00  0.00
ATOM     75  CG  GLU     8       7.410  57.290  14.550  1.00  0.00
ATOM     76  CD  GLU     8       8.390  56.130  14.350  1.00  0.00
ATOM     77  OE1 GLU     8       8.150  55.050  14.950  1.00  0.00
ATOM     78  OE2 GLU     8       9.380  56.310  13.600  1.00  0.00
ATOM     79  C   GLU     8       4.410  57.380  16.950  1.00  0.00
ATOM     80  O   GLU     8       4.600  57.450  18.160  1.00  0.00
ATOM     81  N   LEU     9       3.310  56.810  16.420  1.00  0.00
ATOM     82  HN  LEU     9       3.180  56.830  15.420  1.00  0.00
ATOM     83  CA  LEU     9       2.320  56.190  17.240  1.00  0.00
ATOM     84  CB  LEU     9       0.870  56.510  16.840  1.00  0.00
ATOM     85  CG  LEU     9       0.460  57.980  17.070  1.00  0.00
ATOM     86  CD2 LEU     9       1.320  58.940  16.240  1.00  0.00
ATOM     87  CD1 LEU     9       0.450  58.320  18.570  1.00  0.00
ATOM     88  C   LEU     9       2.500  54.720  17.070  1.00  0.00
ATOM     89  O   LEU     9       2.870  54.250  16.000  1.00  0.00
ATOM     90  N   TYR    10       2.260  53.950  18.150  1.00  0.00
ATOM     91  HN  TYR    10       1.970  54.370  19.020  1.00  0.00
ATOM     92  CA  TYR    10       2.420  52.530  18.050  1.00  0.00
ATOM     93  CB  TYR    10       2.740  51.860  19.390  1.00  0.00
ATOM     94  CG  TYR    10       4.030  52.430  19.890  1.00  0.00
ATOM     95  CD1 TYR    10       4.050  53.660  20.510  1.00  0.00
ATOM     96  CD2 TYR    10       5.210  51.740  19.740  1.00  0.00
ATOM     97  CE1 TYR    10       5.230  54.190  20.970  1.00  0.00
ATOM     98  CE2 TYR    10       6.390  52.260  20.200  1.00  0.00
ATOM     99  CZ  TYR    10       6.400  53.490  20.820  1.00  0.00
ATOM    100  OH  TYR    10       7.620  54.030  21.300  1.00  0.00
ATOM    101  HH  TYR    10       8.330  53.420  21.110  1.00  0.00
ATOM    102  C   TYR    10       1.100  52.000  17.590  1.00  0.00
ATOM    103  O   TYR    10       0.070  52.290  18.190  1.00  0.00
ATOM    104  N   GLN    11       1.110  51.220  16.500  1.00  0.00
ATOM    105  HN  GLN    11       1.970  51.000  16.020  1.00  0.00
ATOM    106  CA  GLN    11      -0.140  50.690  16.040  1.00  0.00
ATOM    107  CB  GLN    11      -0.630  51.290  14.710  1.00  0.00
ATOM    108  CG  GLN    11      -1.050  52.760  14.820  1.00  0.00
ATOM    109  CD  GLN    11      -1.610  53.170  13.460  1.00  0.00
ATOM    110  OE1 GLN    11      -2.430  54.080  13.360  1.00  0.00
ATOM    111  NE2 GLN    11      -1.150  52.480  12.390  1.00  0.00
ATOM    112 HE22 GLN    11      -0.470  51.740  12.510  1.00  0.00
ATOM    113 HE21 GLN    11      -1.490  52.700  11.460  1.00  0.00
ATOM    114  C   GLN    11       0.040  49.230  15.800  1.00  0.00
ATOM    115  O   GLN    11       1.160  48.720  15.750  1.00  0.00
ATOM    116  N   VAL    12      -1.100  48.510  15.690  1.00  0.00
ATOM    117  HN  VAL    12      -1.990  48.970  15.790  1.00  0.00
ATOM    118  CA  VAL    12      -1.060  47.100  15.420  1.00  0.00
ATOM    119  CB  VAL    12      -2.340  46.390  15.740  1.00  0.00
ATOM    120  CG1 VAL    12      -2.620  46.540  17.250  1.00  0.00
ATOM    121  CG2 VAL    12      -3.460  46.940  14.830  1.00  0.00
ATOM    122  C   VAL    12      -0.800  46.970  13.960  1.00  0.00
ATOM    123  O   VAL    12      -1.170  47.850  13.180  1.00  0.00
ATOM    124  N   GLU    13      -0.150  45.870  13.550  1.00  0.00
ATOM    125  HN  GLU    13       0.110  45.150  14.200  1.00  0.00
ATOM    126  CA  GLU    13       0.160  45.740  12.150  1.00  0.00
ATOM    127  CB  GLU    13       0.880  44.430  11.790  1.00  0.00
ATOM    128  CG  GLU    13       0.120  43.170  12.210  1.00  0.00
ATOM    129  CD  GLU    13       0.550  42.820  13.620  1.00  0.00
ATOM    130  OE1 GLU    13       1.730  42.420  13.800  1.00  0.00
ATOM    131  OE2 GLU    13      -0.300  42.940  14.550  1.00  0.00
ATOM    132  C   GLU    13      -1.120  45.780  11.380  1.00  0.00
ATOM    133  O   GLU    13      -2.120  45.190  11.760  1.00  0.00
ATOM    134  N   LEU    14      -1.090  46.540  10.260  1.00  0.00
ATOM    135  HN  LEU    14      -0.250  47.020  10.010  1.00  0.00
ATOM    136  CA  LEU    14      -2.250  46.660   9.430  1.00  0.00
ATOM    137  CB  LEU    14      -2.350  48.020   8.720  1.00  0.00
ATOM    138  CG  LEU    14      -3.590  48.140   7.820  1.00  0.00
ATOM    139  CD2 LEU    14      -3.500  49.370   6.900  1.00  0.00
ATOM    140  CD1 LEU    14      -4.890  48.110   8.650  1.00  0.00
ATOM    141  C   LEU    14      -2.120  45.610   8.370  1.00  0.00
ATOM    142  O   LEU    14      -1.030  45.130   8.090  1.00  0.00
ATOM    143  N   GLY    15      -3.260  45.200   7.780  1.00  0.00
ATOM    144  HN  GLY    15      -4.150  45.600   8.040  1.00  0.00
ATOM    145  CA  GLY    15      -3.180  44.200   6.760  1.00  0.00
ATOM    146  C   GLY    15      -4.270  44.440   5.780  1.00  0.00
ATOM    147  O   GLY    15      -5.260  45.120   6.050  1.00  0.00
ATOM    148  N   PRO    16      -4.080  43.880   4.620  1.00  0.00
ATOM    149  CA  PRO    16      -5.060  43.990   3.590  1.00  0.00
ATOM    150  CD  PRO    16      -2.730  43.790   4.080  1.00  0.00
ATOM    151  CB  PRO    16      -4.350  43.620   2.290  1.00  0.00
ATOM    152  CG  PRO    16      -2.880  43.970   2.570  1.00  0.00
ATOM    153  C   PRO    16      -6.200  43.080   3.910  1.00  0.00
ATOM    154  O   PRO    16      -6.020  42.160   4.700  1.00  0.00
ATOM    155  N   GLY    17      -7.390  43.330   3.320  1.00  0.00
ATOM    156  HN  GLY    17      -7.490  44.110   2.690  1.00  0.00
ATOM    157  CA  GLY    17      -8.510  42.470   3.580  1.00  0.00
ATOM    158  C   GLY    17      -9.570  42.830   2.600  1.00  0.00
ATOM    159  O   GLY    17      -9.430  43.780   1.830  1.00  0.00
ATOM    160  N   PRO    18     -10.630  42.080   2.600  1.00  0.00
ATOM    161  CA  PRO    18     -11.690  42.390   1.690  1.00  0.00
ATOM    162  CD  PRO    18     -10.520  40.640   2.830  1.00  0.00
ATOM    163  CB  PRO    18     -12.570  41.140   1.620  1.00  0.00
ATOM    164  CG  PRO    18     -11.590  40.000   1.930  1.00  0.00
ATOM    165  C   PRO    18     -12.400  43.610   2.150  1.00  0.00
ATOM    166  O   PRO    18     -12.380  43.900   3.350  1.00  0.00
ATOM    167  N   SER    19     -13.020  44.360   1.230  1.00  0.00
ATOM    168  HN  SER    19     -12.990  44.090   0.250  1.00  0.00
ATOM    169  CA  SER    19     -13.730  45.550   1.610  1.00  0.00
ATOM    170  CB  SER    19     -13.980  46.510   0.440  1.00  0.00
ATOM    171  OG  SER    19     -12.740  46.980  -0.070  1.00  0.00
ATOM    172  HG  SER    19     -12.900  47.580  -0.800  1.00  0.00
ATOM    173  C   SER    19     -15.050  45.120   2.140  1.00  0.00
ATOM    174  O   SER    19     -15.430  43.960   2.040  1.00  0.00
ATOM    175  N   GLY    20     -15.790  46.070   2.760  1.00  0.00
ATOM    176  HN  GLY    20     -15.430  47.010   2.840  1.00  0.00
ATOM    177  CA  GLY    20     -17.070  45.740   3.320  1.00  0.00
ATOM    178  C   GLY    20     -17.940  46.940   3.160  1.00  0.00
ATOM    179  O   GLY    20     -17.460  48.050   2.920  1.00  0.00
ATOM    180  N   ASP    21     -19.260  46.740   3.280  1.00  0.00
ATOM    181  HN  ASP    21     -19.610  45.810   3.480  1.00  0.00
ATOM    182  CA  ASP    21     -20.200  47.810   3.130  1.00  0.00
ATOM    183  CB  ASP    21     -21.650  47.320   2.970  1.00  0.00
ATOM    184  CG  ASP    21     -22.520  48.450   2.440  1.00  0.00
ATOM    185  OD1 ASP    21     -22.630  49.500   3.120  1.00  0.00
ATOM    186  OD2 ASP    21     -23.120  48.250   1.350  1.00  0.00
ATOM    187  C   ASP    21     -20.100  48.640   4.380  1.00  0.00
ATOM    188  O   ASP    21     -19.800  48.110   5.450  1.00  0.00
ATOM    189  N   MET    22     -20.310  49.960   4.250  1.00  0.00
ATOM    190  HN  MET    22     -20.520  50.350   3.350  1.00  0.00
ATOM    191  CA  MET    22     -20.240  50.820   5.400  1.00  0.00
ATOM    192  CB  MET    22     -19.150  51.900   5.300  1.00  0.00
ATOM    193  CG  MET    22     -19.260  52.820   4.080  1.00  0.00
ATOM    194  SD  MET    22     -17.950  54.090   3.990  1.00  0.00
ATOM    195  CE  MET    22     -18.340  54.620   2.300  1.00  0.00
ATOM    196  C   MET    22     -21.580  51.480   5.550  1.00  0.00
ATOM    197  O   MET    22     -22.370  51.540   4.610  1.00  0.00
ATOM    198  N   ALA    23     -21.870  51.980   6.760  1.00  0.00
ATOM    199  HN  ALA    23     -21.170  51.950   7.490  1.00  0.00
ATOM    200  CA  ALA    23     -23.150  52.560   7.030  1.00  0.00
ATOM    201  CB  ALA    23     -23.940  51.840   8.130  1.00  0.00
ATOM    202  C   ALA    23     -22.940  53.970   7.490  1.00  0.00
ATOM    203  O   ALA    23     -21.810  54.400   7.730  1.00  0.00
ATOM    204  N   ALA    24     -24.050  54.720   7.610  1.00  0.00
ATOM    205  HN  ALA    24     -24.950  54.310   7.420  1.00  0.00
ATOM    206  CA  ALA    24     -23.990  56.100   8.000  1.00  0.00
ATOM    207  CB  ALA    24     -25.370  56.760   8.150  1.00  0.00
ATOM    208  C   ALA    24     -23.320  56.170   9.330  1.00  0.00
ATOM    209  O   ALA    24     -23.360  55.220  10.120  1.00  0.00
ATOM    210  N   LYS    25     -22.650  57.310   9.600  1.00  0.00
ATOM    211  HN  LYS    25     -22.670  58.070   8.940  1.00  0.00
ATOM    212  CA  LYS    25     -21.930  57.450  10.830  1.00  0.00
ATOM    213  CB  LYS    25     -21.170  58.790  10.940  1.00  0.00
ATOM    214  CG  LYS    25     -20.030  58.940   9.930  1.00  0.00
ATOM    215  CD  LYS    25     -18.910  57.910  10.110  1.00  0.00
ATOM    216  CE  LYS    25     -17.870  58.310  11.150  1.00  0.00
ATOM    217  NZ  LYS    25     -16.850  57.240  11.280  1.00  0.00
ATOM    218  HZ1 LYS    25     -17.300  56.380  11.560  1.00  0.00
ATOM    219  HZ2 LYS    25     -16.390  57.100  10.380  1.00  0.00
ATOM    220  HZ3 LYS    25     -16.160  57.510  11.970  1.00  0.00
ATOM    221  C   LYS    25     -22.890  57.360  11.960  1.00  0.00
ATOM    222  O   LYS    25     -23.940  58.000  11.960  1.00  0.00
ATOM    223  N   MET    26     -22.540  56.520  12.950  1.00  0.00
ATOM    224  HN  MET    26     -21.680  56.010  12.870  1.00  0.00
ATOM    225  CA  MET    26     -23.350  56.330  14.110  1.00  0.00
ATOM    226  CB  MET    26     -24.450  55.270  13.930  1.00  0.00
ATOM    227  CG  MET    26     -25.560  55.700  12.960  1.00  0.00
ATOM    228  SD  MET    26     -26.700  56.950  13.640  1.00  0.00
ATOM    229  CE  MET    26     -27.540  55.780  14.740  1.00  0.00
ATOM    230  C   MET    26     -22.420  55.810  15.160  1.00  0.00
ATOM    231  O   MET    26     -21.220  55.670  14.920  1.00  0.00
ATOM    232  N   SER    27     -22.950  55.530  16.370  1.00  0.00
ATOM    233  HN  SER    27     -23.930  55.670  16.540  1.00  0.00
ATOM    234  CA  SER    27     -22.090  55.010  17.390  1.00  0.00
ATOM    235  CB  SER    27     -22.820  54.700  18.710  1.00  0.00
ATOM    236  OG  SER    27     -23.370  55.890  19.260  1.00  0.00
ATOM    237  HG  SER    27     -23.820  55.680  20.080  1.00  0.00
ATOM    238  C   SER    27     -21.550  53.730  16.860  1.00  0.00
ATOM    239  O   SER    27     -22.220  53.030  16.100  1.00  0.00
ATOM    240  N   LYS    28     -20.300  53.400  17.220  1.00  0.00
ATOM    241  HN  LYS    28     -19.770  53.990  17.850  1.00  0.00
ATOM    242  CA  LYS    28     -19.730  52.190  16.710  1.00  0.00
ATOM    243  CB  LYS    28     -18.270  52.310  16.250  1.00  0.00
ATOM    244  CG  LYS    28     -18.070  53.210  15.040  1.00  0.00
ATOM    245  CD  LYS    28     -16.610  53.350  14.610  1.00  0.00
ATOM    246  CE  LYS    28     -15.710  53.960  15.690  1.00  0.00
ATOM    247  NZ  LYS    28     -14.290  53.850  15.280  1.00  0.00
ATOM    248  HZ1 LYS    28     -14.050  52.870  15.160  1.00  0.00
ATOM    249  HZ2 LYS    28     -14.140  54.340  14.410  1.00  0.00
ATOM    250  HZ3 LYS    28     -13.700  54.250  16.000  1.00  0.00
ATOM    251  C   LYS    28     -19.780  51.160  17.780  1.00  0.00
ATOM    252  O   LYS    28     -19.970  51.460  18.950  1.00  0.00
ATOM    253  N   LYS    29     -19.630  49.890  17.360  1.00  0.00
ATOM    254  HN  LYS    29     -19.490  49.710  16.380  1.00  0.00
ATOM    255  CA  LYS    29     -19.660  48.790  18.270  1.00  0.00
ATOM    256  CB  LYS    29     -19.690  47.430  17.560  1.00  0.00
ATOM    257  CG  LYS    29     -20.950  47.220  16.720  1.00  0.00
ATOM    258  CD  LYS    29     -20.830  46.090  15.700  1.00  0.00
ATOM    259  CE  LYS    29     -22.070  45.920  14.820  1.00  0.00
ATOM    260  NZ  LYS    29     -21.800  44.910  13.770  1.00  0.00
ATOM    261  HZ1 LYS    29     -21.020  45.220  13.200  1.00  0.00
ATOM    262  HZ2 LYS    29     -21.570  44.020  14.210  1.00  0.00
ATOM    263  HZ3 LYS    29     -22.630  44.800  13.190  1.00  0.00
ATOM    264  C   LYS    29     -18.410  48.850  19.080  1.00  0.00
ATOM    265  O   LYS    29     -17.370  49.280  18.610  1.00  0.00
ATOM    266  N   LYS    30     -18.510  48.410  20.350  1.00  0.00
ATOM    267  HN  LYS    30     -19.400  48.060  20.690  1.00  0.00
ATOM    268  CA  LYS    30     -17.390  48.440  21.240  1.00  0.00
ATOM    269  CB  LYS    30     -17.800  48.260  22.720  1.00  0.00
ATOM    270  CG  LYS    30     -16.670  48.560  23.710  1.00  0.00
ATOM    271  CD  LYS    30     -17.170  48.720  25.150  1.00  0.00
ATOM    272  CE  LYS    30     -18.160  49.880  25.330  1.00  0.00
ATOM    273  NZ  LYS    30     -18.720  49.850  26.700  1.00  0.00
ATOM    274  HZ1 LYS    30     -19.200  48.980  26.850  1.00  0.00
ATOM    275  HZ2 LYS    30     -17.960  49.940  27.370  1.00  0.00
ATOM    276  HZ3 LYS    30     -19.360  50.620  26.810  1.00  0.00
ATOM    277  C   LYS    30     -16.490  47.310  20.870  1.00  0.00
ATOM    278  O   LYS    30     -16.920  46.330  20.260  1.00  0.00
ATOM    279  N   ALA    31     -15.200  47.430  21.210  1.00  0.00
ATOM    280  HN  ALA    31     -14.890  48.250  21.710  1.00  0.00
ATOM    281  CA  ALA    31     -14.250  46.400  20.880  1.00  0.00
ATOM    282  CB  ALA    31     -12.790  46.800  21.150  1.00  0.00
ATOM    283  C   ALA    31     -14.560  45.200  21.700  1.00  0.00
ATOM    284  O   ALA    31     -15.080  45.300  22.820  1.00  0.00
ATOM    285  N   GLY    32     -14.260  44.010  21.140  1.00  0.00
ATOM    286  HN  GLY    32     -13.860  43.990  20.220  1.00  0.00
ATOM    287  CA  GLY    32     -14.500  42.770  21.820  1.00  0.00
ATOM    288  C   GLY    32     -14.740  41.750  20.760  1.00  0.00
ATOM    289  O   GLY    32     -14.840  42.090  19.580  1.00  0.00
ATOM    290  N   ARG    33     -14.820  40.470  21.140  1.00  0.00
ATOM    291  HN  ARG    33     -14.720  40.200  22.110  1.00  0.00
ATOM    292  CA  ARG    33     -15.070  39.490  20.120  1.00  0.00
ATOM    293  CB  ARG    33     -14.790  38.030  20.550  1.00  0.00
ATOM    294  CG  ARG    33     -15.670  37.520  21.690  1.00  0.00
ATOM    295  CD  ARG    33     -15.330  36.090  22.100  1.00  0.00
ATOM    296  NE  ARG    33     -16.280  35.680  23.190  1.00  0.00
ATOM    297  HE  ARG    33     -16.030  35.830  24.150  1.00  0.00
ATOM    298  CZ  ARG    33     -17.470  35.110  22.860  1.00  0.00
ATOM    299  NH1 ARG    33     -17.790  34.880  21.560  1.00  0.00
ATOM    300 HH11 ARG    33     -17.150  35.140  20.830  1.00  0.00
ATOM    301 HH12 ARG    33     -18.680  34.460  21.320  1.00  0.00
ATOM    302  NH2 ARG    33     -18.350  34.760  23.850  1.00  0.00
ATOM    303 HH21 ARG    33     -18.110  34.930  24.820  1.00  0.00
ATOM    304 HH22 ARG    33     -19.230  34.340  23.620  1.00  0.00
ATOM    305  C   ARG    33     -16.510  39.600  19.770  1.00  0.00
ATOM    306  O   ARG    33     -17.360  39.810  20.640  1.00  0.00
ATOM    307  N   GLY    34     -16.830  39.470  18.470  1.00  0.00
ATOM    308  HN  GLY    34     -16.120  39.310  17.780  1.00  0.00
ATOM    309  CA  GLY    34     -18.210  39.560  18.110  1.00  0.00
ATOM    310  C   GLY    34     -18.280  39.760  16.640  1.00  0.00
ATOM    311  O   GLY    34     -17.270  40.000  15.970  1.00  0.00
ATOM    312  N   GLY    35     -19.510  39.690  16.090  1.00  0.00
ATOM    313  HN  GLY    35     -20.310  39.510  16.690  1.00  0.00
ATOM    314  CA  GLY    35     -19.710  39.860  14.690  1.00  0.00
ATOM    315  C   GLY    35     -20.360  38.600  14.210  1.00  0.00
ATOM    316  O   GLY    35     -20.590  37.680  14.990  1.00  0.00
ATOM    317  N   GLY    36     -20.680  38.540  12.900  1.00  0.00
ATOM    318  HN  GLY    36     -20.510  39.330  12.300  1.00  0.00
ATOM    319  CA  GLY    36     -21.270  37.350  12.390  1.00  0.00
ATOM    320  C   GLY    36     -21.610  37.600  10.960  1.00  0.00
ATOM    321  O   GLY    36     -22.000  38.710  10.590  1.00  0.00
ATOM    322  N   LYS    37     -21.470  36.560  10.120  1.00  0.00
ATOM    323  HN  LYS    37     -21.130  35.670  10.470  1.00  0.00
ATOM    324  CA  LYS    37     -21.790  36.700   8.740  1.00  0.00
ATOM    325  CB  LYS    37     -20.570  36.630   7.810  1.00  0.00
ATOM    326  CG  LYS    37     -20.920  36.810   6.330  1.00  0.00
ATOM    327  CD  LYS    37     -19.700  37.140   5.460  1.00  0.00
ATOM    328  CE  LYS    37     -19.290  38.620   5.530  1.00  0.00
ATOM    329  NZ  LYS    37     -18.060  38.840   4.730  1.00  0.00
ATOM    330  HZ1 LYS    37     -17.310  38.260   5.090  1.00  0.00
ATOM    331  HZ2 LYS    37     -18.240  38.590   3.770  1.00  0.00
ATOM    332  HZ3 LYS    37     -17.800  39.810   4.790  1.00  0.00
ATOM    333  C   LYS    37     -22.700  35.570   8.390  1.00  0.00
ATOM    334  O   LYS    37     -22.600  34.480   8.960  1.00  0.00
ATOM    335  N   ARG    38     -23.650  35.810   7.470  1.00  0.00
ATOM    336  HN  ARG    38     -23.700  36.720   7.040  1.00  0.00
ATOM    337  CA  ARG    38     -24.570  34.790   7.080  1.00  0.00
ATOM    338  CB  ARG    38     -25.920  35.320   6.590  1.00  0.00
ATOM    339  CG  ARG    38     -26.810  35.930   7.670  1.00  0.00
ATOM    340  CD  ARG    38     -28.150  36.430   7.120  1.00  0.00
ATOM    341  NE  ARG    38     -28.470  35.580   5.940  1.00  0.00
ATOM    342  HE  ARG    38     -27.750  35.370   5.270  1.00  0.00
ATOM    343  CZ  ARG    38     -29.730  35.090   5.750  1.00  0.00
ATOM    344  NH1 ARG    38     -30.700  35.310   6.690  1.00  0.00
ATOM    345 HH11 ARG    38     -30.480  35.830   7.530  1.00  0.00
ATOM    346 HH12 ARG    38     -31.630  34.940   6.550  1.00  0.00
ATOM    347  NH2 ARG    38     -30.020  34.380   4.630  1.00  0.00
ATOM    348 HH21 ARG    38     -29.300  34.220   3.930  1.00  0.00
ATOM    349 HH22 ARG    38     -30.950  34.010   4.480  1.00  0.00
ATOM    350  C   ARG    38     -23.990  34.040   5.930  1.00  0.00
ATOM    351  O   ARG    38     -23.230  34.590   5.140  1.00  0.00
ATOM    352  N   LYS    39     -24.320  32.730   5.830  1.00  0.00
ATOM    353  HN  LYS    39     -24.870  32.290   6.560  1.00  0.00
ATOM    354  CA  LYS    39     -23.890  31.990   4.690  1.00  0.00
ATOM    355  CB  LYS    39     -23.520  30.520   4.960  1.00  0.00
ATOM    356  CG  LYS    39     -22.270  30.300   5.820  1.00  0.00
ATOM    357  CD  LYS    39     -22.510  30.430   7.330  1.00  0.00
ATOM    358  CE  LYS    39     -22.370  31.850   7.880  1.00  0.00
ATOM    359  NZ  LYS    39     -22.480  31.820   9.360  1.00  0.00
ATOM    360  HZ1 LYS    39     -23.390  31.450   9.620  1.00  0.00
ATOM    361  HZ2 LYS    39     -21.750  31.240   9.740  1.00  0.00
ATOM    362  HZ3 LYS    39     -22.390  32.760   9.720  1.00  0.00
ATOM    363  C   LYS    39     -25.070  31.960   3.770  1.00  0.00
ATOM    364  O   LYS    39     -26.200  31.790   4.210  1.00  0.00
ATOM    365  N   GLU    40     -24.830  32.140   2.460  1.00  0.00
ATOM    366  HN  GLU    40     -23.880  32.260   2.120  1.00  0.00
ATOM    367  CA  GLU    40     -25.930  32.170   1.550  1.00  0.00
ATOM    368  CB  GLU    40     -26.020  33.480   0.740  1.00  0.00
ATOM    369  CG  GLU    40     -26.420  34.670   1.610  1.00  0.00
ATOM    370  CD  GLU    40     -26.190  35.950   0.820  1.00  0.00
ATOM    371  OE1 GLU    40     -25.000  36.300   0.600  1.00  0.00
ATOM    372  OE2 GLU    40     -27.200  36.600   0.430  1.00  0.00
ATOM    373  C   GLU    40     -25.780  31.040   0.580  1.00  0.00
ATOM    374  O   GLU    40     -24.670  30.650   0.230  1.00  0.00
ATOM    375  N   LYS    41     -26.920  30.470   0.150  1.00  0.00
ATOM    376  HN  LYS    41     -27.810  30.830   0.480  1.00  0.00
ATOM    377  CA  LYS    41     -26.910  29.380  -0.770  1.00  0.00
ATOM    378  CB  LYS    41     -28.280  28.710  -0.970  1.00  0.00
ATOM    379  CG  LYS    41     -28.650  27.700   0.110  1.00  0.00
ATOM    380  CD  LYS    41     -27.740  26.470   0.100  1.00  0.00
ATOM    381  CE  LYS    41     -28.160  25.370   1.080  1.00  0.00
ATOM    382  NZ  LYS    41     -27.290  24.180   0.890  1.00  0.00
ATOM    383  HZ1 LYS    41     -27.380  23.840  -0.060  1.00  0.00
ATOM    384  HZ2 LYS    41     -26.330  24.440   1.070  1.00  0.00
ATOM    385  HZ3 LYS    41     -27.580  23.450   1.540  1.00  0.00
ATOM    386  C   LYS    41     -26.470  29.880  -2.090  1.00  0.00
ATOM    387  O   LYS    41     -26.740  31.020  -2.470  1.00  0.00
ATOM    388  N   LEU    42     -25.730  29.020  -2.820  1.00  0.00
ATOM    389  HN  LEU    42     -25.510  28.110  -2.440  1.00  0.00
ATOM    390  CA  LEU    42     -25.270  29.370  -4.130  1.00  0.00
ATOM    391  CB  LEU    42     -24.160  28.450  -4.650  1.00  0.00
ATOM    392  CG  LEU    42     -22.850  28.550  -3.850  1.00  0.00
ATOM    393  CD2 LEU    42     -23.060  28.180  -2.370  1.00  0.00
ATOM    394  CD1 LEU    42     -22.200  29.930  -4.020  1.00  0.00
ATOM    395  C   LEU    42     -26.440  29.250  -5.050  1.00  0.00
ATOM    396  O   LEU    42     -27.320  28.420  -4.840  1.00  0.00
ATOM    397  N   GLU    43     -26.480  30.120  -6.070  1.00  0.00
ATOM    398  HN  GLU    43     -25.750  30.810  -6.170  1.00  0.00
ATOM    399  CA  GLU    43     -27.550  30.080  -7.020  1.00  0.00
ATOM    400  CB  GLU    43     -27.760  31.420  -7.750  1.00  0.00
ATOM    401  CG  GLU    43     -29.040  31.480  -8.580  1.00  0.00
ATOM    402  CD  GLU    43     -29.160  32.900  -9.120  1.00  0.00
ATOM    403  OE1 GLU    43     -28.230  33.700  -8.860  1.00  0.00
ATOM    404  OE2 GLU    43     -30.190  33.190  -9.790  1.00  0.00
ATOM    405  C   GLU    43     -27.190  29.040  -8.030  1.00  0.00
ATOM    406  O   GLU    43     -26.020  28.670  -8.170  1.00  0.00
ATOM    407  N   ASN    44     -28.190  28.510  -8.750  1.00  0.00
ATOM    408  HN  ASN    44     -29.140  28.810  -8.600  1.00  0.00
ATOM    409  CA  ASN    44     -27.890  27.500  -9.730  1.00  0.00
ATOM    410  CB  ASN    44     -29.120  26.680 -10.150  1.00  0.00
ATOM    411  CG  ASN    44     -29.610  25.890  -8.950  1.00  0.00
ATOM    412  OD1 ASN    44     -29.750  26.420  -7.850  1.00  0.00
ATOM    413  ND2 ASN    44     -29.890  24.570  -9.160  1.00  0.00
ATOM    414 HD22 ASN    44     -29.760  24.170 -10.080  1.00  0.00
ATOM    415 HD21 ASN    44     -30.220  24.000  -8.400  1.00  0.00
ATOM    416  C   ASN    44     -27.400  28.220 -10.940  1.00  0.00
ATOM    417  O   ASN    44     -28.130  29.000 -11.560  1.00  0.00
ATOM    418  N   MET    45     -26.130  27.980 -11.320  1.00  0.00
ATOM    419  HN  MET    45     -25.550  27.350 -10.780  1.00  0.00
ATOM    420  CA  MET    45     -25.600  28.630 -12.480  1.00  0.00
ATOM    421  CB  MET    45     -24.420  29.560 -12.190  1.00  0.00
ATOM    422  CG  MET    45     -24.790  30.790 -11.350  1.00  0.00
ATOM    423  SD  MET    45     -23.410  31.930 -11.000  1.00  0.00
ATOM    424  CE  MET    45     -22.640  30.880  -9.740  1.00  0.00
ATOM    425  C   MET    45     -25.110  27.560 -13.400  1.00  0.00
ATOM    426  O   MET    45     -24.320  26.700 -13.010  1.00  0.00
ATOM    427  N   LYS    46     -25.600  27.580 -14.650  1.00  0.00
ATOM    428  HN  LYS    46     -26.270  28.290 -14.890  1.00  0.00
ATOM    429  CA  LYS    46     -25.200  26.640 -15.660  1.00  0.00
ATOM    430  CB  LYS    46     -26.110  25.400 -15.720  1.00  0.00
ATOM    431  CG  LYS    46     -26.140  24.580 -14.420  1.00  0.00
ATOM    432  CD  LYS    46     -27.360  23.660 -14.330  1.00  0.00
ATOM    433  CE  LYS    46     -28.670  24.410 -14.060  1.00  0.00
ATOM    434  NZ  LYS    46     -29.810  23.460 -14.050  1.00  0.00
ATOM    435  HZ1 LYS    46     -29.870  22.990 -14.950  1.00  0.00
ATOM    436  HZ2 LYS    46     -29.660  22.770 -13.320  1.00  0.00
ATOM    437  HZ3 LYS    46     -30.670  23.960 -13.870  1.00  0.00
ATOM    438  C   LYS    46     -25.420  27.370 -16.940  1.00  0.00
ATOM    439  O   LYS    46     -25.910  28.490 -16.900  1.00  0.00
ATOM    440  N   LYS    47     -25.000  26.770 -18.080  1.00  0.00
ATOM    441  HN  LYS    47     -24.500  25.890 -17.990  1.00  0.00
ATOM    442  CA  LYS    47     -25.220  27.280 -19.410  1.00  0.00
ATOM    443  CB  LYS    47     -25.170  28.820 -19.510  1.00  0.00
ATOM    444  CG  LYS    47     -26.540  29.500 -19.360  1.00  0.00
ATOM    445  CD  LYS    47     -26.470  31.010 -19.110  1.00  0.00
ATOM    446  CE  LYS    47     -27.840  31.690 -19.040  1.00  0.00
ATOM    447  NZ  LYS    47     -27.690  33.150 -18.860  1.00  0.00
ATOM    448  HZ1 LYS    47     -27.180  33.330 -17.990  1.00  0.00
ATOM    449  HZ2 LYS    47     -27.170  33.540 -19.640  1.00  0.00
ATOM    450  HZ3 LYS    47     -28.600  33.590 -18.810  1.00  0.00
ATOM    451  C   LYS    47     -24.150  26.740 -20.320  1.00  0.00
ATOM    452  O   LYS    47     -23.000  27.120 -20.140  1.00  0.00
ATOM    453  N   GLU    48     -24.450  25.800 -21.260  1.00  0.00
ATOM    454  HN  GLU    48     -25.390  25.430 -21.330  1.00  0.00
ATOM    455  CA  GLU    48     -23.420  25.340 -22.180  1.00  0.00
ATOM    456  CB  GLU    48     -22.080  24.950 -21.520  1.00  0.00
ATOM    457  CG  GLU    48     -22.060  23.540 -20.930  1.00  0.00
ATOM    458  CD  GLU    48     -20.740  23.230 -20.250  1.00  0.00
ATOM    459  OE1 GLU    48     -20.600  23.560 -19.050  1.00  0.00
ATOM    460  OE2 GLU    48     -19.850  22.650 -20.930  1.00  0.00
ATOM    461  C   GLU    48     -23.890  24.130 -22.940  1.00  0.00
ATOM    462  O   GLU    48     -24.960  23.600 -22.680  1.00  0.00
ATOM    463  N   MET    49     -23.090  23.670 -23.940  1.00  0.00
ATOM    464  HN  MET    49     -22.240  24.170 -24.150  1.00  0.00
ATOM    465  CA  MET    49     -23.420  22.490 -24.700  1.00  0.00
ATOM    466  CB  MET    49     -24.300  22.690 -25.940  1.00  0.00
ATOM    467  CG  MET    49     -25.770  22.940 -25.620  1.00  0.00
ATOM    468  SD  MET    49     -26.850  22.650 -27.040  1.00  0.00
ATOM    469  CE  MET    49     -26.600  20.850 -27.040  1.00  0.00
ATOM    470  C   MET    49     -22.160  21.810 -25.150  1.00  0.00
ATOM    471  O   MET    49     -21.110  21.980 -24.530  1.00  0.00
ATOM    472  N   GLU    50     -22.230  20.970 -26.210  1.00  0.00
ATOM    473  HN  GLU    50     -23.090  20.820 -26.720  1.00  0.00
ATOM    474  CA  GLU    50     -21.010  20.300 -26.560  1.00  0.00
ATOM    475  CB  GLU    50     -20.660  19.180 -25.570  1.00  0.00
ATOM    476  CG  GLU    50     -19.450  18.340 -25.970  1.00  0.00
ATOM    477  CD  GLU    50     -19.280  17.240 -24.930  1.00  0.00
ATOM    478  OE1 GLU    50     -19.210  17.570 -23.720  1.00  0.00
ATOM    479  OE2 GLU    50     -19.220  16.050 -25.350  1.00  0.00
ATOM    480  C   GLU    50     -21.090  19.640 -27.910  1.00  0.00
ATOM    481  O   GLU    50     -22.110  19.040 -28.270  1.00  0.00
ATOM    482  N   ILE    51     -20.000  19.750 -28.690  1.00  0.00
ATOM    483  HN  ILE    51     -19.270  20.390 -28.420  1.00  0.00
ATOM    484  CA  ILE    51     -19.840  19.000 -29.910  1.00  0.00
ATOM    485  CB  ILE    51     -20.870  19.260 -30.990  1.00  0.00
ATOM    486  CG2 ILE    51     -20.660  20.650 -31.610  1.00  0.00
ATOM    487  CG1 ILE    51     -20.800  18.130 -32.030  1.00  0.00
ATOM    488  CD1 ILE    51     -21.220  16.770 -31.470  1.00  0.00
ATOM    489  C   ILE    51     -18.450  19.260 -30.440  1.00  0.00
ATOM    490  O   ILE    51     -18.090  20.390 -30.770  1.00  0.00
ATOM    491  N   ASN    52     -17.610  18.220 -30.520  1.00  0.00
ATOM    492  HN  ASN    52     -17.890  17.290 -30.230  1.00  0.00
ATOM    493  CA  ASN    52     -16.300  18.470 -31.040  1.00  0.00
ATOM    494  CB  ASN    52     -15.270  17.380 -30.700  1.00  0.00
ATOM    495  CG  ASN    52     -13.950  17.800 -31.320  1.00  0.00
ATOM    496  OD1 ASN    52     -13.320  18.750 -30.870  1.00  0.00
ATOM    497  ND2 ASN    52     -13.510  17.060 -32.380  1.00  0.00
ATOM    498 HD22 ASN    52     -14.060  16.290 -32.720  1.00  0.00
ATOM    499 HD21 ASN    52     -12.640  17.300 -32.840  1.00  0.00
ATOM    500  C   ASN    52     -16.440  18.480 -32.520  1.00  0.00
ATOM    501  O   ASN    52     -16.580  17.430 -33.140  1.00  0.00
ATOM    502  N   ASP    53     -16.400  19.680 -33.140  1.00  0.00
ATOM    503  HN  ASP    53     -16.240  20.530 -32.620  1.00  0.00
ATOM    504  CA  ASP    53     -16.590  19.690 -34.560  1.00  0.00
ATOM    505  CB  ASP    53     -18.020  20.090 -34.990  1.00  0.00
ATOM    506  CG  ASP    53     -18.980  18.920 -34.760  1.00  0.00
ATOM    507  OD1 ASP    53     -18.500  17.750 -34.760  1.00  0.00
ATOM    508  OD2 ASP    53     -20.200  19.180 -34.610  1.00  0.00
ATOM    509  C   ASP    53     -15.690  20.660 -35.240  1.00  0.00
ATOM    510  O   ASP    53     -16.150  21.670 -35.780  1.00  0.00
ATOM    511  N   HIS    54     -14.370  20.430 -35.220  1.00  0.00
ATOM    512  HN  HIS    54     -13.990  19.700 -34.630  1.00  0.00
ATOM    513  CA  HIS    54     -13.490  21.220 -36.030  1.00  0.00
ATOM    514  ND1 HIS    54     -11.420  19.210 -34.040  1.00  0.00
ATOM    515  CG  HIS    54     -11.650  19.650 -35.320  1.00  0.00
ATOM    516  CB  HIS    54     -12.010  21.070 -35.650  1.00  0.00
ATOM    517  NE2 HIS    54     -11.180  17.450 -35.370  1.00  0.00
ATOM    518  HE2 HIS    54     -11.010  16.510 -35.700  1.00  0.00
ATOM    519  CD2 HIS    54     -11.500  18.570 -36.120  1.00  0.00
ATOM    520  CE1 HIS    54     -11.140  17.890 -34.130  1.00  0.00
ATOM    521  C   HIS    54     -13.660  20.720 -37.430  1.00  0.00
ATOM    522  O   HIS    54     -13.460  21.460 -38.400  1.00  0.00
ATOM    523  N   GLN    55     -13.970  19.420 -37.550  1.00  0.00
ATOM    524  HN  GLN    55     -14.070  18.870 -36.710  1.00  0.00
ATOM    525  CA  GLN    55     -14.160  18.780 -38.820  1.00  0.00
ATOM    526  CB  GLN    55     -14.190  17.240 -38.750  1.00  0.00
ATOM    527  CG  GLN    55     -15.400  16.670 -38.000  1.00  0.00
ATOM    528  CD  GLN    55     -15.350  15.150 -38.150  1.00  0.00
ATOM    529  OE1 GLN    55     -14.300  14.530 -38.030  1.00  0.00
ATOM    530  NE2 GLN    55     -16.530  14.540 -38.430  1.00  0.00
ATOM    531 HE22 GLN    55     -17.380  15.080 -38.520  1.00  0.00
ATOM    532 HE21 GLN    55     -16.560  13.530 -38.540  1.00  0.00
ATOM    533  C   GLN    55     -15.450  19.220 -39.450  1.00  0.00
ATOM    534  O   GLN    55     -15.540  19.340 -40.670  1.00  0.00
ATOM    535  N   LEU    56     -16.480  19.460 -38.630  1.00  0.00
ATOM    536  HN  LEU    56     -16.350  19.440 -37.630  1.00  0.00
ATOM    537  CA  LEU    56     -17.780  19.760 -39.170  1.00  0.00
ATOM    538  CB  LEU    56     -18.860  19.820 -38.090  1.00  0.00
ATOM    539  CG  LEU    56     -20.280  19.800 -38.650  1.00  0.00
ATOM    540  CD2 LEU    56     -21.330  20.150 -37.590  1.00  0.00
ATOM    541  CD1 LEU    56     -20.560  18.450 -39.340  1.00  0.00
ATOM    542  C   LEU    56     -17.720  21.100 -39.840  1.00  0.00
ATOM    543  O   LEU    56     -16.900  21.950 -39.500  1.00  0.00
ATOM    544  N   SER    57     -18.590  21.300 -40.860  1.00  0.00
ATOM    545  HN  SER    57     -19.230  20.560 -41.100  1.00  0.00
ATOM    546  CA  SER    57     -18.620  22.530 -41.600  1.00  0.00
ATOM    547  CB  SER    57     -19.340  22.390 -42.960  1.00  0.00
ATOM    548  OG  SER    57     -20.720  22.130 -42.750  1.00  0.00
ATOM    549  HG  SER    57     -21.160  22.040 -43.600  1.00  0.00
ATOM    550  C   SER    57     -19.380  23.540 -40.800  1.00  0.00
ATOM    551  O   SER    57     -19.980  23.220 -39.780  1.00  0.00
ATOM    552  N   VAL    58     -19.350  24.810 -41.260  1.00  0.00
ATOM    553  HN  VAL    58     -18.830  25.020 -42.100  1.00  0.00
ATOM    554  CA  VAL    58     -20.020  25.880 -40.570  1.00  0.00
ATOM    555  CB  VAL    58     -19.810  27.210 -41.240  1.00  0.00
ATOM    556  CG1 VAL    58     -20.630  28.260 -40.470  1.00  0.00
ATOM    557  CG2 VAL    58     -18.310  27.510 -41.300  1.00  0.00
ATOM    558  C   VAL    58     -21.490  25.620 -40.580  1.00  0.00
ATOM    559  O   VAL    58     -22.160  25.780 -39.570  1.00  0.00
ATOM    560  N   ALA    59     -22.030  25.220 -41.750  1.00  0.00
ATOM    561  HN  ALA    59     -21.440  25.090 -42.560  1.00  0.00
ATOM    562  CA  ALA    59     -23.440  24.970 -41.860  1.00  0.00
ATOM    563  CB  ALA    59     -23.870  24.630 -43.300  1.00  0.00
ATOM    564  C   ALA    59     -23.810  23.800 -41.000  1.00  0.00
ATOM    565  O   ALA    59     -24.760  23.860 -40.230  1.00  0.00
ATOM    566  N   GLU    60     -23.010  22.720 -41.070  1.00  0.00
ATOM    567  HN  GLU    60     -22.170  22.740 -41.620  1.00  0.00
ATOM    568  CA  GLU    60     -23.360  21.540 -40.340  1.00  0.00
ATOM    569  CB  GLU    60     -22.430  20.350 -40.600  1.00  0.00
ATOM    570  CG  GLU    60     -22.520  19.810 -42.030  1.00  0.00
ATOM    571  CD  GLU    60     -21.910  18.420 -42.060  1.00  0.00
ATOM    572  OE1 GLU    60     -22.520  17.490 -41.470  1.00  0.00
ATOM    573  OE2 GLU    60     -20.820  18.260 -42.680  1.00  0.00
ATOM    574  C   GLU    60     -23.380  21.840 -38.880  1.00  0.00
ATOM    575  O   GLU    60     -24.180  21.280 -38.130  1.00  0.00
ATOM    576  N   LEU    61     -22.470  22.720 -38.420  1.00  0.00
ATOM    577  HN  LEU    61     -21.830  23.150 -39.070  1.00  0.00
ATOM    578  CA  LEU    61     -22.400  23.060 -37.030  1.00  0.00
ATOM    579  CB  LEU    61     -21.160  23.910 -36.720  1.00  0.00
ATOM    580  CG  LEU    61     -20.920  24.120 -35.230  1.00  0.00
ATOM    581  CD2 LEU    61     -19.830  25.180 -34.990  1.00  0.00
ATOM    582  CD1 LEU    61     -20.630  22.790 -34.520  1.00  0.00
ATOM    583  C   LEU    61     -23.630  23.820 -36.620  1.00  0.00
ATOM    584  O   LEU    61     -24.270  23.510 -35.610  1.00  0.00
ATOM    585  N   GLU    62     -24.030  24.820 -37.430  1.00  0.00
ATOM    586  HN  GLU    62     -23.500  25.010 -38.270  1.00  0.00
ATOM    587  CA  GLU    62     -25.180  25.620 -37.120  1.00  0.00
ATOM    588  CB  GLU    62     -25.460  26.690 -38.190  1.00  0.00
ATOM    589  CG  GLU    62     -24.430  27.820 -38.220  1.00  0.00
ATOM    590  CD  GLU    62     -24.820  28.780 -39.330  1.00  0.00
ATOM    591  OE1 GLU    62     -25.510  28.340 -40.280  1.00  0.00
ATOM    592  OE2 GLU    62     -24.420  29.980 -39.250  1.00  0.00
ATOM    593  C   GLU    62     -26.330  24.680 -37.130  1.00  0.00
ATOM    594  O   GLU    62     -27.310  24.870 -36.420  1.00  0.00
ATOM    595  N   GLN    63     -26.240  23.650 -37.990  1.00  0.00
ATOM    596  HN  GLN    63     -25.410  23.570 -38.560  1.00  0.00
ATOM    597  CA  GLN    63     -27.270  22.670 -38.140  1.00  0.00
ATOM    598  CB  GLN    63     -26.920  21.670 -39.260  1.00  0.00
ATOM    599  CG  GLN    63     -27.960  20.580 -39.500  1.00  0.00
ATOM    600  CD  GLN    63     -29.040  21.120 -40.420  1.00  0.00
ATOM    601  OE1 GLN    63     -28.950  22.240 -40.910  1.00  0.00
ATOM    602  NE2 GLN    63     -30.090  20.290 -40.680  1.00  0.00
ATOM    603 HE22 GLN    63     -30.120  19.380 -40.260  1.00  0.00
ATOM    604 HE21 GLN    63     -30.830  20.600 -41.290  1.00  0.00
ATOM    605  C   GLN    63     -27.430  21.860 -36.890  1.00  0.00
ATOM    606  O   GLN    63     -28.530  21.760 -36.360  1.00  0.00
ATOM    607  N   LYS    64     -26.330  21.320 -36.340  1.00  0.00
ATOM    608  HN  LYS    64     -25.410  21.540 -36.690  1.00  0.00
ATOM    609  CA  LYS    64     -26.490  20.410 -35.230  1.00  0.00
ATOM    610  CB  LYS    64     -25.170  19.750 -34.790  1.00  0.00
ATOM    611  CG  LYS    64     -25.410  18.460 -34.010  1.00  0.00
ATOM    612  CD  LYS    64     -24.200  17.530 -33.990  1.00  0.00
ATOM    613  CE  LYS    64     -24.530  16.100 -33.540  1.00  0.00
ATOM    614  NZ  LYS    64     -23.390  15.200 -33.830  1.00  0.00
ATOM    615  HZ1 LYS    64     -23.210  15.200 -34.830  1.00  0.00
ATOM    616  HZ2 LYS    64     -22.570  15.530 -33.330  1.00  0.00
ATOM    617  HZ3 LYS    64     -23.620  14.260 -33.530  1.00  0.00
ATOM    618  C   LYS    64     -27.110  21.130 -34.080  1.00  0.00
ATOM    619  O   LYS    64     -28.050  20.630 -33.460  1.00  0.00
ATOM    620  N   TYR    65     -26.590  22.320 -33.760  1.00  0.00
ATOM    621  HN  TYR    65     -25.800  22.650 -34.290  1.00  0.00
ATOM    622  CA  TYR    65     -27.100  23.160 -32.710  1.00  0.00
ATOM    623  CB  TYR    65     -26.150  24.300 -32.310  1.00  0.00
ATOM    624  CG  TYR    65     -25.040  23.640 -31.570  1.00  0.00
ATOM    625  CD1 TYR    65     -23.950  23.120 -32.230  1.00  0.00
ATOM    626  CD2 TYR    65     -25.110  23.540 -30.200  1.00  0.00
ATOM    627  CE1 TYR    65     -22.950  22.500 -31.520  1.00  0.00
ATOM    628  CE2 TYR    65     -24.100  22.930 -29.490  1.00  0.00
ATOM    629  CZ  TYR    65     -23.020  22.410 -30.160  1.00  0.00
ATOM    630  OH  TYR    65     -21.990  21.770 -29.440  1.00  0.00
ATOM    631  HH  TYR    65     -22.190  21.790 -28.510  1.00  0.00
ATOM    632  C   TYR    65     -28.420  23.740 -33.110  1.00  0.00
ATOM    633  O   TYR    65     -29.240  24.060 -32.250  1.00  0.00
ATOM    634  N   GLN    66     -28.650  23.880 -34.430  1.00  0.00
ATOM    635  HN  GLN    66     -27.970  23.520 -35.080  1.00  0.00
ATOM    636  CA  GLN    66     -29.830  24.510 -34.940  1.00  0.00
ATOM    637  CB  GLN    66     -31.140  23.750 -34.640  1.00  0.00
ATOM    638  CG  GLN    66     -31.290  22.480 -35.480  1.00  0.00
ATOM    639  CD  GLN    66     -31.580  22.910 -36.910  1.00  0.00
ATOM    640  OE1 GLN    66     -31.150  23.980 -37.340  1.00  0.00
ATOM    641  NE2 GLN    66     -32.320  22.060 -37.670  1.00  0.00
ATOM    642 HE22 GLN    66     -32.660  21.190 -37.270  1.00  0.00
ATOM    643 HE21 GLN    66     -32.540  22.300 -38.620  1.00  0.00
ATOM    644  C   GLN    66     -29.960  25.900 -34.410  1.00  0.00
ATOM    645  O   GLN    66     -30.810  26.190 -33.560  1.00  0.00
ATOM    646  N   THR    67     -29.060  26.800 -34.870  1.00  0.00
ATOM    647  HN  THR    67     -28.350  26.490 -35.530  1.00  0.00
ATOM    648  CA  THR    67     -29.090  28.170 -34.450  1.00  0.00
ATOM    649  CB  THR    67     -27.910  28.560 -33.630  1.00  0.00
ATOM    650  OG1 THR    67     -26.730  28.520 -34.420  1.00  0.00
ATOM    651  HG1 THR    67     -25.970  28.770 -33.880  1.00  0.00
ATOM    652  CG2 THR    67     -27.770  27.550 -32.470  1.00  0.00
ATOM    653  C   THR    67     -29.040  29.030 -35.680  1.00  0.00
ATOM    654  O   THR    67     -28.740  28.570 -36.780  1.00  0.00
ATOM    655  N   SER    68     -29.350  30.340 -35.510  1.00  0.00
ATOM    656  HN  SER    68     -29.620  30.670 -34.600  1.00  0.00
ATOM    657  CA  SER    68     -29.300  31.260 -36.610  1.00  0.00
ATOM    658  CB  SER    68     -30.570  32.110 -36.760  1.00  0.00
ATOM    659  OG  SER    68     -30.440  32.990 -37.870  1.00  0.00
ATOM    660  HG  SER    68     -31.240  33.520 -37.950  1.00  0.00
ATOM    661  C   SER    68     -28.160  32.190 -36.360  1.00  0.00
ATOM    662  O   SER    68     -28.090  32.850 -35.330  1.00  0.00
ATOM    663  N   ALA    69     -27.230  32.290 -37.330  1.00  0.00
ATOM    664  HN  ALA    69     -27.370  31.780 -38.200  1.00  0.00
ATOM    665  CA  ALA    69     -26.060  33.090 -37.170  1.00  0.00
ATOM    666  CB  ALA    69     -25.150  33.080 -38.410  1.00  0.00
ATOM    667  C   ALA    69     -26.480  34.510 -36.940  1.00  0.00
ATOM    668  O   ALA    69     -25.840  35.230 -36.180  1.00  0.00
ATOM    669  N   THR    70     -27.520  34.970 -37.650  1.00  0.00
ATOM    670  HN  THR    70     -27.990  34.360 -38.310  1.00  0.00
ATOM    671  CA  THR    70     -27.970  36.320 -37.490  1.00  0.00
ATOM    672  CB  THR    70     -28.950  36.710 -38.540  1.00  0.00
ATOM    673  OG1 THR    70     -30.110  35.890 -38.460  1.00  0.00
ATOM    674  HG1 THR    70     -30.740  36.140 -39.150  1.00  0.00
ATOM    675  CG2 THR    70     -28.280  36.540 -39.920  1.00  0.00
ATOM    676  C   THR    70     -28.620  36.540 -36.150  1.00  0.00
ATOM    677  O   THR    70     -28.220  37.430 -35.400  1.00  0.00
ATOM    678  N   LYS    71     -29.670  35.740 -35.830  1.00  0.00
ATOM    679  HN  LYS    71     -29.920  35.010 -36.480  1.00  0.00
ATOM    680  CA  LYS    71     -30.460  35.900 -34.640  1.00  0.00
ATOM    681  CB  LYS    71     -31.790  35.140 -34.720  1.00  0.00
ATOM    682  CG  LYS    71     -32.730  35.680 -35.800  1.00  0.00
ATOM    683  CD  LYS    71     -33.890  34.740 -36.130  1.00  0.00
ATOM    684  CE  LYS    71     -34.830  35.290 -37.210  1.00  0.00
ATOM    685  NZ  LYS    71     -35.890  34.300 -37.490  1.00  0.00
ATOM    686  HZ1 LYS    71     -35.480  33.440 -37.820  1.00  0.00
ATOM    687  HZ2 LYS    71     -36.420  34.120 -36.650  1.00  0.00
ATOM    688  HZ3 LYS    71     -36.510  34.670 -38.210  1.00  0.00
ATOM    689  C   LYS    71     -29.770  35.410 -33.400  1.00  0.00
ATOM    690  O   LYS    71     -29.600  36.150 -32.430  1.00  0.00
ATOM    691  N   GLY    72     -29.310  34.140 -33.420  1.00  0.00
ATOM    692  HN  GLY    72     -29.390  33.600 -34.270  1.00  0.00
ATOM    693  CA  GLY    72     -28.710  33.540 -32.260  1.00  0.00
ATOM    694  C   GLY    72     -29.710  32.650 -31.580  1.00  0.00
ATOM    695  O   GLY    72     -30.810  32.410 -32.080  1.00  0.00
ATOM    696  N   LEU    73     -29.320  32.110 -30.400  1.00  0.00
ATOM    697  HN  LEU    73     -28.400  32.360 -30.050  1.00  0.00
ATOM    698  CA  LEU    73     -30.120  31.210 -29.630  1.00  0.00
ATOM    699  CB  LEU    73     -29.340  30.550 -28.480  1.00  0.00
ATOM    700  CG  LEU    73     -28.220  29.600 -28.940  1.00  0.00
ATOM    701  CD2 LEU    73     -28.780  28.530 -29.890  1.00  0.00
ATOM    702  CD1 LEU    73     -27.490  28.980 -27.740  1.00  0.00
ATOM    703  C   LEU    73     -31.240  31.980 -29.000  1.00  0.00
ATOM    704  O   LEU    73     -31.060  33.120 -28.570  1.00  0.00
ATOM    705  N   SER    74     -32.430  31.350 -28.920  1.00  0.00
ATOM    706  HN  SER    74     -32.530  30.430 -29.300  1.00  0.00
ATOM    707  CA  SER    74     -33.540  32.000 -28.300  1.00  0.00
ATOM    708  CB  SER    74     -34.890  31.320 -28.620  1.00  0.00
ATOM    709  OG  SER    74     -34.910  30.000 -28.120  1.00  0.00
ATOM    710  HG  SER    74     -35.750  29.590 -28.320  1.00  0.00
ATOM    711  C   SER    74     -33.320  31.930 -26.830  1.00  0.00
ATOM    712  O   SER    74     -32.560  31.090 -26.340  1.00  0.00
ATOM    713  N   ALA    75     -34.020  32.790 -26.080  1.00  0.00
ATOM    714  HN  ALA    75     -34.690  33.400 -26.520  1.00  0.00
ATOM    715  CA  ALA    75     -33.840  32.870 -24.660  1.00  0.00
ATOM    716  CB  ALA    75     -34.810  33.850 -23.980  1.00  0.00
ATOM    717  C   ALA    75     -34.100  31.510 -24.110  1.00  0.00
ATOM    718  O   ALA    75     -33.500  31.100 -23.120  1.00  0.00
ATOM    719  N   SER    76     -35.050  30.790 -24.730  1.00  0.00
ATOM    720  HN  SER    76     -35.520  31.180 -25.530  1.00  0.00
ATOM    721  CA  SER    76     -35.390  29.480 -24.280  1.00  0.00
ATOM    722  CB  SER    76     -36.600  28.890 -25.030  1.00  0.00
ATOM    723  OG  SER    76     -37.760  29.660 -24.760  1.00  0.00
ATOM    724  HG  SER    76     -38.510  29.290 -25.230  1.00  0.00
ATOM    725  C   SER    76     -34.240  28.520 -24.470  1.00  0.00
ATOM    726  O   SER    76     -33.930  27.740 -23.570  1.00  0.00
ATOM    727  N   LEU    77     -33.570  28.580 -25.630  1.00  0.00
ATOM    728  HN  LEU    77     -33.800  29.300 -26.300  1.00  0.00
ATOM    729  CA  LEU    77     -32.530  27.630 -25.930  1.00  0.00
ATOM    730  CB  LEU    77     -31.940  27.820 -27.340  1.00  0.00
ATOM    731  CG  LEU    77     -32.960  27.540 -28.460  1.00  0.00
ATOM    732  CD2 LEU    77     -33.640  26.170 -28.270  1.00  0.00
ATOM    733  CD1 LEU    77     -32.330  27.700 -29.850  1.00  0.00
ATOM    734  C   LEU    77     -31.440  27.780 -24.930  1.00  0.00
ATOM    735  O   LEU    77     -30.790  26.810 -24.560  1.00  0.00
ATOM    736  N   ALA    78     -31.190  29.020 -24.480  1.00  0.00
ATOM    737  HN  ALA    78     -31.750  29.800 -24.800  1.00  0.00
ATOM    738  CA  ALA    78     -30.130  29.230 -23.550  1.00  0.00
ATOM    739  CB  ALA    78     -29.990  30.710 -23.140  1.00  0.00
ATOM    740  C   ALA    78     -30.410  28.440 -22.310  1.00  0.00
ATOM    741  O   ALA    78     -29.540  27.740 -21.800  1.00  0.00
ATOM    742  N   ALA    79     -31.660  28.510 -21.810  1.00  0.00
ATOM    743  HN  ALA    79     -32.370  29.060 -22.280  1.00  0.00
ATOM    744  CA  ALA    79     -31.980  27.800 -20.610  1.00  0.00
ATOM    745  CB  ALA    79     -33.420  28.040 -20.140  1.00  0.00
ATOM    746  C   ALA    79     -31.830  26.330 -20.870  1.00  0.00
ATOM    747  O   ALA    79     -31.240  25.610 -20.080  1.00  0.00
ATOM    748  N   GLU    80     -32.350  25.870 -22.030  1.00  0.00
ATOM    749  HN  GLU    80     -32.740  26.510 -22.700  1.00  0.00
ATOM    750  CA  GLU    80     -32.330  24.470 -22.310  1.00  0.00
ATOM    751  CB  GLU    80     -33.030  24.110 -23.630  1.00  0.00
ATOM    752  CG  GLU    80     -33.010  22.610 -23.920  1.00  0.00
ATOM    753  CD  GLU    80     -33.850  21.920 -22.860  1.00  0.00
ATOM    754  OE1 GLU    80     -35.030  22.310 -22.700  1.00  0.00
ATOM    755  OE2 GLU    80     -33.310  21.000 -22.190  1.00  0.00
ATOM    756  C   GLU    80     -30.920  23.970 -22.410  1.00  0.00
ATOM    757  O   GLU    80     -30.590  22.940 -21.830  1.00  0.00
ATOM    758  N   LEU    81     -30.060  24.700 -23.150  1.00  0.00
ATOM    759  HN  LEU    81     -30.370  25.560 -23.560  1.00  0.00
ATOM    760  CA  LEU    81     -28.710  24.270 -23.350  1.00  0.00
ATOM    761  CB  LEU    81     -27.950  25.200 -24.320  1.00  0.00
ATOM    762  CG  LEU    81     -28.700  25.410 -25.650  1.00  0.00
ATOM    763  CD2 LEU    81     -29.380  24.130 -26.130  1.00  0.00
ATOM    764  CD1 LEU    81     -27.790  26.080 -26.690  1.00  0.00
ATOM    765  C   LEU    81     -27.990  24.320 -22.040  1.00  0.00
ATOM    766  O   LEU    81     -27.260  23.410 -21.670  1.00  0.00
ATOM    767  N   LEU    82     -28.250  25.390 -21.290  1.00  0.00
ATOM    768  HN  LEU    82     -28.940  26.050 -21.630  1.00  0.00
ATOM    769  CA  LEU    82     -27.620  25.680 -20.040  1.00  0.00
ATOM    770  CB  LEU    82     -28.360  26.910 -19.460  1.00  0.00
ATOM    771  CG  LEU    82     -28.150  27.370 -18.010  1.00  0.00
ATOM    772  CD2 LEU    82     -28.610  26.320 -16.980  1.00  0.00
ATOM    773  CD1 LEU    82     -28.880  28.690 -17.760  1.00  0.00
ATOM    774  C   LEU    82     -27.800  24.500 -19.150  1.00  0.00
ATOM    775  O   LEU    82     -26.840  23.970 -18.590  1.00  0.00
ATOM    776  N   LEU    83     -29.060  24.040 -19.010  1.00  0.00
ATOM    777  HN  LEU    83     -29.790  24.500 -19.530  1.00  0.00
ATOM    778  CA  LEU    83     -29.400  22.930 -18.180  1.00  0.00
ATOM    779  CB  LEU    83     -30.930  22.760 -18.080  1.00  0.00
ATOM    780  CG  LEU    83     -31.490  21.650 -17.150  1.00  0.00
ATOM    781  CD2 LEU    83     -30.980  20.240 -17.480  1.00  0.00
ATOM    782  CD1 LEU    83     -33.030  21.690 -17.150  1.00  0.00
ATOM    783  C   LEU    83     -28.790  21.700 -18.770  1.00  0.00
ATOM    784  O   LEU    83     -28.350  20.810 -18.050  1.00  0.00
ATOM    785  N   ARG    84     -28.790  21.620 -20.110  1.00  0.00
ATOM    786  HN  ARG    84     -29.130  22.400 -20.650  1.00  0.00
ATOM    787  CA  ARG    84     -28.310  20.460 -20.800  1.00  0.00
ATOM    788  CB  ARG    84     -28.450  20.570 -22.330  1.00  0.00
ATOM    789  CG  ARG    84     -27.950  19.330 -23.080  1.00  0.00
ATOM    790  CD  ARG    84     -27.740  19.580 -24.580  1.00  0.00
ATOM    791  NE  ARG    84     -27.390  18.270 -25.210  1.00  0.00
ATOM    792  HE  ARG    84     -26.420  17.990 -25.280  1.00  0.00
ATOM    793  CZ  ARG    84     -28.380  17.470 -25.680  1.00  0.00
ATOM    794  NH1 ARG    84     -29.680  17.880 -25.600  1.00  0.00
ATOM    795 HH11 ARG    84     -29.900  18.780 -25.190  1.00  0.00
ATOM    796 HH12 ARG    84     -30.420  17.290 -25.960  1.00  0.00
ATOM    797  NH2 ARG    84     -28.080  16.260 -26.240  1.00  0.00
ATOM    798 HH21 ARG    84     -27.120  15.950 -26.300  1.00  0.00
ATOM    799 HH22 ARG    84     -28.820  15.670 -26.600  1.00  0.00
ATOM    800  C   ARG    84     -26.850  20.260 -20.530  1.00  0.00
ATOM    801  O   ARG    84     -26.440  19.160 -20.150  1.00  0.00
ATOM    802  N   ASP    85     -26.030  21.310 -20.680  1.00  0.00
ATOM    803  HN  ASP    85     -26.360  22.240 -20.900  1.00  0.00
ATOM    804  CA  ASP    85     -24.650  21.000 -20.490  1.00  0.00
ATOM    805  CB  ASP    85     -23.780  21.330 -21.700  1.00  0.00
ATOM    806  CG  ASP    85     -22.470  20.580 -21.530  1.00  0.00
ATOM    807  OD1 ASP    85     -22.420  19.710 -20.610  1.00  0.00
ATOM    808  OD2 ASP    85     -21.520  20.850 -22.300  1.00  0.00
ATOM    809  C   ASP    85     -24.150  21.580 -19.190  1.00  0.00
ATOM    810  O   ASP    85     -23.570  20.840 -18.380  1.00  0.00
ATOM    811  N   GLY    86     -24.340  22.880 -18.900  1.00  0.00
ATOM    812  HN  GLY    86     -24.750  23.510 -19.580  1.00  0.00
ATOM    813  CA  GLY    86     -23.950  23.340 -17.590  1.00  0.00
ATOM    814  C   GLY    86     -23.190  24.620 -17.690  1.00  0.00
ATOM    815  O   GLY    86     -22.770  25.010 -18.760  1.00  0.00
ATOM    816  N   PRO    87     -22.960  25.290 -16.590  1.00  0.00
ATOM    817  CA  PRO    87     -22.280  26.550 -16.600  1.00  0.00
ATOM    818  CD  PRO    87     -22.880  24.630 -15.290  1.00  0.00
ATOM    819  CB  PRO    87     -22.120  26.930 -15.130  1.00  0.00
ATOM    820  CG  PRO    87     -22.010  25.560 -14.440  1.00  0.00
ATOM    821  C   PRO    87     -20.940  26.390 -17.250  1.00  0.00
ATOM    822  O   PRO    87     -20.290  25.370 -17.020  1.00  0.00
ATOM    823  N   ASN    88     -20.500  27.380 -18.040  1.00  0.00
ATOM    824  HN  ASN    88     -21.080  28.200 -18.170  1.00  0.00
ATOM    825  CA  ASN    88     -19.230  27.310 -18.710  1.00  0.00
ATOM    826  CB  ASN    88     -19.170  28.250 -19.930  1.00  0.00
ATOM    827  CG  ASN    88     -17.780  28.210 -20.540  1.00  0.00
ATOM    828  OD1 ASN    88     -16.940  27.370 -20.180  1.00  0.00
ATOM    829  ND2 ASN    88     -17.510  29.140 -21.490  1.00  0.00
ATOM    830 HD22 ASN    88     -18.220  29.810 -21.750  1.00  0.00
ATOM    831 HD21 ASN    88     -16.600  29.170 -21.930  1.00  0.00
ATOM    832  C   ASN    88     -18.190  27.800 -17.750  1.00  0.00
ATOM    833  O   ASN    88     -17.850  28.980 -17.760  1.00  0.00
ATOM    834  N   ALA    89     -17.650  26.890 -16.920  1.00  0.00
ATOM    835  HN  ALA    89     -17.970  25.940 -16.950  1.00  0.00
ATOM    836  CA  ALA    89     -16.620  27.260 -15.980  1.00  0.00
ATOM    837  CB  ALA    89     -17.120  28.120 -14.810  1.00  0.00
ATOM    838  C   ALA    89     -16.070  26.000 -15.380  1.00  0.00
ATOM    839  O   ALA    89     -16.690  24.940 -15.460  1.00  0.00
ATOM    840  N   LEU    90     -14.870  26.080 -14.770  1.00  0.00
ATOM    841  HN  LEU    90     -14.380  26.960 -14.740  1.00  0.00
ATOM    842  CA  LEU    90     -14.280  24.920 -14.140  1.00  0.00
ATOM    843  CB  LEU    90     -12.750  24.870 -14.220  1.00  0.00
ATOM    844  CG  LEU    90     -12.180  24.570 -15.620  1.00  0.00
ATOM    845  CD2 LEU    90     -10.670  24.310 -15.560  1.00  0.00
ATOM    846  CD1 LEU    90     -12.560  25.680 -16.620  1.00  0.00
ATOM    847  C   LEU    90     -14.650  24.920 -12.690  1.00  0.00
ATOM    848  O   LEU    90     -14.710  25.970 -12.050  1.00  0.00
ATOM    849  N   ARG    91     -14.900  23.720 -12.120  1.00  0.00
ATOM    850  HN  ARG    91     -14.780  22.870 -12.650  1.00  0.00
ATOM    851  CA  ARG    91     -15.330  23.670 -10.750  1.00  0.00
ATOM    852  CB  ARG    91     -15.660  22.250 -10.250  1.00  0.00
ATOM    853  CG  ARG    91     -16.770  21.550 -11.030  1.00  0.00
ATOM    854  CD  ARG    91     -17.130  20.180 -10.460  1.00  0.00
ATOM    855  NE  ARG    91     -15.860  19.420 -10.330  1.00  0.00
ATOM    856  HE  ARG    91     -14.980  19.910 -10.290  1.00  0.00
ATOM    857  CZ  ARG    91     -15.880  18.050 -10.270  1.00  0.00
ATOM    858  NH1 ARG    91     -17.060  17.380 -10.400  1.00  0.00
ATOM    859 HH11 ARG    91     -17.920  17.890 -10.540  1.00  0.00
ATOM    860 HH12 ARG    91     -17.070  16.370 -10.360  1.00  0.00
ATOM    861  NH2 ARG    91     -14.720  17.360 -10.080  1.00  0.00
ATOM    862 HH21 ARG    91     -13.840  17.860  -9.980  1.00  0.00
ATOM    863 HH22 ARG    91     -14.730  16.350 -10.040  1.00  0.00
ATOM    864  C   ARG    91     -14.220  24.180  -9.880  1.00  0.00
ATOM    865  O   ARG    91     -13.080  23.750 -10.010  1.00  0.00
ATOM    866  N   PRO    92     -14.530  25.120  -9.010  1.00  0.00
ATOM    867  CA  PRO    92     -13.530  25.630  -8.120  1.00  0.00
ATOM    868  CD  PRO    92     -15.550  26.110  -9.320  1.00  0.00
ATOM    869  CB  PRO    92     -13.980  27.040  -7.720  1.00  0.00
ATOM    870  CG  PRO    92     -15.460  27.110  -8.150  1.00  0.00
ATOM    871  C   PRO    92     -13.250  24.740  -6.940  1.00  0.00
ATOM    872  O   PRO    92     -14.200  24.430  -6.220  1.00  0.00
ATOM    873  N   PRO    93     -12.030  24.330  -6.710  1.00  0.00
ATOM    874  CA  PRO    93     -11.780  23.530  -5.530  1.00  0.00
ATOM    875  CD  PRO    93     -11.280  23.810  -7.850  1.00  0.00
ATOM    876  CB  PRO    93     -10.850  22.400  -5.950  1.00  0.00
ATOM    877  CG  PRO    93     -10.950  22.360  -7.480  1.00  0.00
ATOM    878  C   PRO    93     -11.130  24.340  -4.440  1.00  0.00
ATOM    879  O   PRO    93     -10.500  25.350  -4.730  1.00  0.00
ATOM    880  N   ARG    94     -11.270  23.880  -3.180  1.00  0.00
ATOM    881  HN  ARG    94     -11.900  23.100  -3.030  1.00  0.00
ATOM    882  CA  ARG    94     -10.580  24.410  -2.030  1.00  0.00
ATOM    883  CB  ARG    94     -11.050  25.820  -1.640  1.00  0.00
ATOM    884  CG  ARG    94     -12.560  25.920  -1.350  1.00  0.00
ATOM    885  CD  ARG    94     -13.030  27.320  -0.960  1.00  0.00
ATOM    886  NE  ARG    94     -14.480  27.210  -0.650  1.00  0.00
ATOM    887  HE  ARG    94     -14.800  27.150   0.310  1.00  0.00
ATOM    888  CZ  ARG    94     -15.390  27.200  -1.670  1.00  0.00
ATOM    889  NH1 ARG    94     -14.960  27.280  -2.970  1.00  0.00
ATOM    890 HH11 ARG    94     -13.970  27.340  -3.170  1.00  0.00
ATOM    891 HH12 ARG    94     -15.630  27.270  -3.720  1.00  0.00
ATOM    892  NH2 ARG    94     -16.730  27.120  -1.400  1.00  0.00
ATOM    893 HH21 ARG    94     -17.040  27.060  -0.440  1.00  0.00
ATOM    894 HH22 ARG    94     -17.400  27.110  -2.150  1.00  0.00
ATOM    895  C   ARG    94     -10.900  23.460  -0.900  1.00  0.00
ATOM    896  O   ARG    94     -11.600  23.790   0.060  1.00  0.00
ATOM    897  N   GLY    95     -10.320  22.260  -0.960  1.00  0.00
ATOM    898  HN  GLY    95      -9.610  22.100  -1.660  1.00  0.00
ATOM    899  CA  GLY    95     -10.670  21.180  -0.080  1.00  0.00
ATOM    900  C   GLY    95     -10.370  21.420   1.370  1.00  0.00
ATOM    901  O   GLY    95     -11.110  20.930   2.220  1.00  0.00
ATOM    902  N   THR    96      -9.290  22.140   1.730  1.00  0.00
ATOM    903  HN  THR    96      -8.760  22.670   1.050  1.00  0.00
ATOM    904  CA  THR    96      -8.930  22.100   3.120  1.00  0.00
ATOM    905  CB  THR    96      -7.480  21.780   3.350  1.00  0.00
ATOM    906  OG1 THR    96      -7.160  20.520   2.790  1.00  0.00
ATOM    907  HG1 THR    96      -6.230  20.330   2.940  1.00  0.00
ATOM    908  CG2 THR    96      -7.220  21.780   4.860  1.00  0.00
ATOM    909  C   THR    96      -9.230  23.350   3.900  1.00  0.00
ATOM    910  O   THR    96      -8.680  24.420   3.650  1.00  0.00
ATOM    911  N   PRO    97     -10.080  23.180   4.880  1.00  0.00
ATOM    912  CA  PRO    97     -10.410  24.250   5.780  1.00  0.00
ATOM    913  CD  PRO    97     -11.210  22.290   4.680  1.00  0.00
ATOM    914  CB  PRO    97     -11.750  23.880   6.430  1.00  0.00
ATOM    915  CG  PRO    97     -12.400  22.950   5.390  1.00  0.00
ATOM    916  C   PRO    97      -9.330  24.430   6.800  1.00  0.00
ATOM    917  O   PRO    97      -8.560  23.490   7.030  1.00  0.00
ATOM    918  N   GLU    98      -9.260  25.610   7.430  1.00  0.00
ATOM    919  HN  GLU    98      -9.950  26.320   7.230  1.00  0.00
ATOM    920  CA  GLU    98      -8.230  25.900   8.390  1.00  0.00
ATOM    921  CB  GLU    98      -8.290  27.330   8.930  1.00  0.00
ATOM    922  CG  GLU    98      -7.990  28.400   7.880  1.00  0.00
ATOM    923  CD  GLU    98      -6.490  28.430   7.640  1.00  0.00
ATOM    924  OE1 GLU    98      -5.740  27.870   8.490  1.00  0.00
ATOM    925  OE2 GLU    98      -6.070  29.010   6.600  1.00  0.00
ATOM    926  C   GLU    98      -8.360  24.980   9.560  1.00  0.00
ATOM    927  O   GLU    98      -7.370  24.430  10.030  1.00  0.00
ATOM    928  N   TYR    99      -9.590  24.770  10.050  1.00  0.00
ATOM    929  HN  TYR    99     -10.400  25.180   9.610  1.00  0.00
ATOM    930  CA  TYR    99      -9.740  23.950  11.220  1.00  0.00
ATOM    931  CB  TYR    99     -11.190  23.920  11.730  1.00  0.00
ATOM    932  CG  TYR    99     -11.260  22.900  12.830  1.00  0.00
ATOM    933  CD1 TYR    99     -10.970  23.240  14.130  1.00  0.00
ATOM    934  CD2 TYR    99     -11.590  21.600  12.530  1.00  0.00
ATOM    935  CE1 TYR    99     -11.030  22.300  15.130  1.00  0.00
ATOM    936  CE2 TYR    99     -11.650  20.650  13.530  1.00  0.00
ATOM    937  CZ  TYR    99     -11.370  21.000  14.830  1.00  0.00
ATOM    938  OH  TYR    99     -11.430  20.020  15.840  1.00  0.00
ATOM    939  HH  TYR    99     -11.680  19.180  15.460  1.00  0.00
ATOM    940  C   TYR    99      -9.310  22.560  10.920  1.00  0.00
ATOM    941  O   TYR    99      -8.540  21.960  11.670  1.00  0.00
ATOM    942  N   VAL   100      -9.780  22.000   9.800  1.00  0.00
ATOM    943  HN  VAL   100     -10.370  22.540   9.180  1.00  0.00
ATOM    944  CA  VAL   100      -9.450  20.650   9.470  1.00  0.00
ATOM    945  CB  VAL   100     -10.150  20.150   8.240  1.00  0.00
ATOM    946  CG1 VAL   100     -11.670  20.160   8.520  1.00  0.00
ATOM    947  CG2 VAL   100      -9.740  21.020   7.030  1.00  0.00
ATOM    948  C   VAL   100      -7.970  20.590   9.250  1.00  0.00
ATOM    949  O   VAL   100      -7.340  19.570   9.540  1.00  0.00
ATOM    950  N   LYS   101      -7.380  21.690   8.740  1.00  0.00
ATOM    951  HN  LYS   101      -7.930  22.510   8.560  1.00  0.00
ATOM    952  CA  LYS   101      -5.970  21.700   8.460  1.00  0.00
ATOM    953  CB  LYS   101      -5.460  23.030   7.900  1.00  0.00
ATOM    954  CG  LYS   101      -3.930  23.050   7.810  1.00  0.00
ATOM    955  CD  LYS   101      -3.360  21.940   6.920  1.00  0.00
ATOM    956  CE  LYS   101      -3.630  22.140   5.440  1.00  0.00
ATOM    957  NZ  LYS   101      -3.040  21.020   4.680  1.00  0.00
ATOM    958  HZ1 LYS   101      -2.040  20.990   4.840  1.00  0.00
ATOM    959  HZ2 LYS   101      -3.460  20.150   4.980  1.00  0.00
ATOM    960  HZ3 LYS   101      -3.210  21.160   3.680  1.00  0.00
ATOM    961  C   LYS   101      -5.180  21.410   9.700  1.00  0.00
ATOM    962  O   LYS   101      -4.260  20.600   9.670  1.00  0.00
ATOM    963  N   PHE   102      -5.530  22.030  10.840  1.00  0.00
ATOM    964  HN  PHE   102      -6.330  22.650  10.860  1.00  0.00
ATOM    965  CA  PHE   102      -4.770  21.820  12.040  1.00  0.00
ATOM    966  CB  PHE   102      -5.330  22.550  13.280  1.00  0.00
ATOM    967  CG  PHE   102      -5.280  24.020  13.080  1.00  0.00
ATOM    968  CD1 PHE   102      -4.160  24.740  13.420  1.00  0.00
ATOM    969  CD2 PHE   102      -6.350  24.690  12.550  1.00  0.00
ATOM    970  CE1 PHE   102      -4.110  26.100  13.240  1.00  0.00
ATOM    971  CE2 PHE   102      -6.320  26.050  12.360  1.00  0.00
ATOM    972  CZ  PHE   102      -5.190  26.760  12.700  1.00  0.00
ATOM    973  C   PHE   102      -4.840  20.360  12.370  1.00  0.00
ATOM    974  O   PHE   102      -3.840  19.750  12.760  1.00  0.00
ATOM    975  N   ALA   103      -6.040  19.770  12.220  1.00  0.00
ATOM    976  HN  ALA   103      -6.790  20.330  11.860  1.00  0.00
ATOM    977  CA  ALA   103      -6.320  18.400  12.550  1.00  0.00
ATOM    978  CB  ALA   103      -7.790  18.030  12.320  1.00  0.00
ATOM    979  C   ALA   103      -5.480  17.490  11.710  1.00  0.00
ATOM    980  O   ALA   103      -4.990  16.460  12.180  1.00  0.00
ATOM    981  N   ARG   104      -5.280  17.850  10.430  1.00  0.00
ATOM    982  HN  ARG   104      -5.630  18.730  10.100  1.00  0.00
ATOM    983  CA  ARG   104      -4.560  17.000   9.520  1.00  0.00
ATOM    984  CB  ARG   104      -4.400  17.610   8.120  1.00  0.00
ATOM    985  CG  ARG   104      -3.960  16.590   7.070  1.00  0.00
ATOM    986  CD  ARG   104      -5.060  15.580   6.730  1.00  0.00
ATOM    987  NE  ARG   104      -4.550  14.700   5.650  1.00  0.00
ATOM    988  HE  ARG   104      -3.550  14.580   5.520  1.00  0.00
ATOM    989  CZ  ARG   104      -5.420  14.050   4.820  1.00  0.00
ATOM    990  NH1 ARG   104      -6.770  14.210   5.000  1.00  0.00
ATOM    991 HH11 ARG   104      -7.110  14.810   5.740  1.00  0.00
ATOM    992 HH12 ARG   104      -7.420  13.740   4.390  1.00  0.00
ATOM    993  NH2 ARG   104      -4.960  13.250   3.820  1.00  0.00
ATOM    994 HH21 ARG   104      -3.960  13.140   3.690  1.00  0.00
ATOM    995 HH22 ARG   104      -5.610  12.780   3.210  1.00  0.00
ATOM    996  C   ARG   104      -3.190  16.810  10.090  1.00  0.00
ATOM    997  O   ARG   104      -2.550  15.780   9.880  1.00  0.00
ATOM    998  N   GLN   105      -2.720  17.810  10.840  1.00  0.00
ATOM    999  HN  GLN   105      -3.330  18.610  10.990  1.00  0.00
ATOM   1000  CA  GLN   105      -1.430  17.850  11.450  1.00  0.00
ATOM   1001  CB  GLN   105      -1.120  19.210  12.110  1.00  0.00
ATOM   1002  CG  GLN   105      -1.100  20.350  11.100  1.00  0.00
ATOM   1003  CD  GLN   105      -0.170  19.930   9.960  1.00  0.00
ATOM   1004  OE1 GLN   105       1.000  19.620  10.170  1.00  0.00
ATOM   1005  NE2 GLN   105      -0.720  19.910   8.710  1.00  0.00
ATOM   1006 HE22 GLN   105      -1.690  20.170   8.580  1.00  0.00
ATOM   1007 HE21 GLN   105      -0.160  19.640   7.920  1.00  0.00
ATOM   1008  C   GLN   105      -1.280  16.780  12.490  1.00  0.00
ATOM   1009  O   GLN   105      -0.150  16.520  12.900  1.00  0.00
ATOM   1010  N   LEU   106      -2.410  16.270  13.040  1.00  0.00
ATOM   1011  HN  LEU   106      -3.260  16.690  12.710  1.00  0.00
ATOM   1012  CA  LEU   106      -2.570  15.230  14.030  1.00  0.00
ATOM   1013  CB  LEU   106      -3.920  15.330  14.750  1.00  0.00
ATOM   1014  CG  LEU   106      -4.060  16.590  15.620  1.00  0.00
ATOM   1015  CD2 LEU   106      -5.300  16.520  16.520  1.00  0.00
ATOM   1016  CD1 LEU   106      -4.020  17.860  14.760  1.00  0.00
ATOM   1017  C   LEU   106      -2.430  13.810  13.530  1.00  0.00
ATOM   1018  O   LEU   106      -2.310  12.910  14.360  1.00  0.00
ATOM   1019  N   ALA   107      -2.560  13.530  12.220  1.00  0.00
ATOM   1020  HN  ALA   107      -2.610  14.300  11.570  1.00  0.00
ATOM   1021  CA  ALA   107      -2.630  12.180  11.680  1.00  0.00
ATOM   1022  CB  ALA   107      -2.900  12.180  10.170  1.00  0.00
ATOM   1023  C   ALA   107      -1.430  11.310  11.910  1.00  0.00
ATOM   1024  O   ALA   107      -1.590  10.120  12.190  1.00  0.00
ATOM   1025  N   GLY   108      -0.190  11.830  11.790  1.00  0.00
ATOM   1026  HN  GLY   108      -0.070  12.820  11.660  1.00  0.00
ATOM   1027  CA  GLY   108       0.960  10.970  11.850  1.00  0.00
ATOM   1028  C   GLY   108       1.000  10.230  13.150  1.00  0.00
ATOM   1029  O   GLY   108       0.770  10.790  14.220  1.00  0.00
ATOM   1030  N   GLY   109       1.370   8.930  13.090  1.00  0.00
ATOM   1031  HN  GLY   109       1.640   8.550  12.190  1.00  0.00
ATOM   1032  CA  GLY   109       1.400   8.090  14.250  1.00  0.00
ATOM   1033  C   GLY   109       2.380   8.630  15.250  1.00  0.00
ATOM   1034  O   GLY   109       2.100   8.630  16.440  1.00  0.00
ATOM   1035  N   LEU   110       3.560   9.100  14.790  1.00  0.00
ATOM   1036  HN  LEU   110       3.750   9.130  13.800  1.00  0.00
ATOM   1037  CA  LEU   110       4.540   9.560  15.730  1.00  0.00
ATOM   1038  CB  LEU   110       5.840  10.060  15.080  1.00  0.00
ATOM   1039  CG  LEU   110       6.710   8.960  14.460  1.00  0.00
ATOM   1040  CD2 LEU   110       6.900   7.790  15.440  1.00  0.00
ATOM   1041  CD1 LEU   110       8.040   9.520  13.930  1.00  0.00
ATOM   1042  C   LEU   110       4.000  10.700  16.520  1.00  0.00
ATOM   1043  O   LEU   110       4.090  10.710  17.750  1.00  0.00
ATOM   1044  N   GLN   111       3.390  11.680  15.840  1.00  0.00
ATOM   1045  HN  GLN   111       3.300  11.600  14.840  1.00  0.00
ATOM   1046  CA  GLN   111       2.870  12.840  16.500  1.00  0.00
ATOM   1047  CB  GLN   111       2.220  13.830  15.520  1.00  0.00
ATOM   1048  CG  GLN   111       1.830  15.170  16.140  1.00  0.00
ATOM   1049  CD  GLN   111       3.090  16.010  16.260  1.00  0.00
ATOM   1050  OE1 GLN   111       3.920  16.030  15.350  1.00  0.00
ATOM   1051  NE2 GLN   111       3.260  16.710  17.410  1.00  0.00
ATOM   1052 HE22 GLN   111       2.560  16.660  18.140  1.00  0.00
ATOM   1053 HE21 GLN   111       4.080  17.280  17.540  1.00  0.00
ATOM   1054  C   GLN   111       1.800  12.370  17.440  1.00  0.00
ATOM   1055  O   GLN   111       1.610  12.940  18.510  1.00  0.00
ATOM   1056  N   CYS   112       1.050  11.340  17.020  1.00  0.00
ATOM   1057  HN  CYS   112       1.240  10.930  16.120  1.00  0.00
ATOM   1058  CA  CYS   112      -0.020  10.800  17.810  1.00  0.00
ATOM   1059  CB  CYS   112      -0.830   9.740  17.040  1.00  0.00
ATOM   1060  SG  CYS   112      -2.180   9.070  18.040  1.00  0.00
ATOM   1061  C   CYS   112       0.520  10.150  19.040  1.00  0.00
ATOM   1062  O   CYS   112      -0.030  10.320  20.130  1.00  0.00
ATOM   1063  N   LEU   113       1.630   9.390  18.910  1.00  0.00
ATOM   1064  HN  LEU   113       2.080   9.340  18.010  1.00  0.00
ATOM   1065  CA  LEU   113       2.180   8.660  20.010  1.00  0.00
ATOM   1066  CB  LEU   113       3.450   7.890  19.630  1.00  0.00
ATOM   1067  CG  LEU   113       4.070   7.110  20.800  1.00  0.00
ATOM   1068  CD2 LEU   113       5.490   6.610  20.450  1.00  0.00
ATOM   1069  CD1 LEU   113       3.150   5.990  21.300  1.00  0.00
ATOM   1070  C   LEU   113       2.550   9.640  21.070  1.00  0.00
ATOM   1071  O   LEU   113       2.310   9.410  22.260  1.00  0.00
ATOM   1072  N   MET   114       3.150  10.770  20.670  1.00  0.00
ATOM   1073  HN  MET   114       3.310  10.930  19.690  1.00  0.00
ATOM   1074  CA  MET   114       3.550  11.750  21.630  1.00  0.00
ATOM   1075  CB  MET   114       4.290  12.960  21.030  1.00  0.00
ATOM   1076  CG  MET   114       5.720  12.640  20.610  1.00  0.00
ATOM   1077  SD  MET   114       6.780  12.070  21.970  1.00  0.00
ATOM   1078  CE  MET   114       6.690  13.600  22.950  1.00  0.00
ATOM   1079  C   MET   114       2.340  12.270  22.320  1.00  0.00
ATOM   1080  O   MET   114       2.400  12.560  23.510  1.00  0.00
ATOM   1081  N   TRP   115       1.210  12.400  21.610  1.00  0.00
ATOM   1082  HN  TRP   115       1.190  12.100  20.640  1.00  0.00
ATOM   1083  CA  TRP   115       0.020  12.960  22.190  1.00  0.00
ATOM   1084  CB  TRP   115      -1.170  12.960  21.210  1.00  0.00
ATOM   1085  CG  TRP   115      -2.430  13.570  21.770  1.00  0.00
ATOM   1086  CD2 TRP   115      -3.750  13.220  21.350  1.00  0.00
ATOM   1087  CD1 TRP   115      -2.570  14.500  22.760  1.00  0.00
ATOM   1088  NE1 TRP   115      -3.900  14.770  22.970  1.00  0.00
ATOM   1089  HE1 TRP   115      -4.270  15.430  23.640  1.00  0.00
ATOM   1090  CE2 TRP   115      -4.640  13.990  22.110  1.00  0.00
ATOM   1091  CE3 TRP   115      -4.200  12.340  20.410  1.00  0.00
ATOM   1092  CZ2 TRP   115      -5.990  13.880  21.930  1.00  0.00
ATOM   1093  CZ3 TRP   115      -5.560  12.240  20.230  1.00  0.00
ATOM   1094  CH2 TRP   115      -6.440  12.990  20.980  1.00  0.00
ATOM   1095  C   TRP   115      -0.400  12.120  23.360  1.00  0.00
ATOM   1096  O   TRP   115      -0.570  12.620  24.460  1.00  0.00
ATOM   1097  N   VAL   116      -0.540  10.790  23.150  1.00  0.00
ATOM   1098  HN  VAL   116      -0.340  10.400  22.240  1.00  0.00
ATOM   1099  CA  VAL   116      -0.980   9.940  24.210  1.00  0.00
ATOM   1100  CB  VAL   116      -1.120   8.500  23.810  1.00  0.00
ATOM   1101  CG1 VAL   116      -2.220   8.400  22.740  1.00  0.00
ATOM   1102  CG2 VAL   116       0.250   7.980  23.370  1.00  0.00
ATOM   1103  C   VAL   116       0.060  10.030  25.280  1.00  0.00
ATOM   1104  O   VAL   116      -0.230   9.910  26.470  1.00  0.00
ATOM   1105  N   ALA   117       1.320  10.230  24.860  1.00  0.00
ATOM   1106  HN  ALA   117       1.490  10.290  23.860  1.00  0.00
ATOM   1107  CA  ALA   117       2.440  10.350  25.750  1.00  0.00
ATOM   1108  CB  ALA   117       3.770  10.500  25.000  1.00  0.00
ATOM   1109  C   ALA   117       2.260  11.580  26.590  1.00  0.00
ATOM   1110  O   ALA   117       2.700  11.630  27.740  1.00  0.00
ATOM   1111  N   ALA   118       1.680  12.640  26.000  1.00  0.00
ATOM   1112  HN  ALA   118       1.390  12.540  25.040  1.00  0.00
ATOM   1113  CA  ALA   118       1.430  13.900  26.640  1.00  0.00
ATOM   1114  CB  ALA   118       0.910  14.970  25.680  1.00  0.00
ATOM   1115  C   ALA   118       0.390  13.730  27.700  1.00  0.00
ATOM   1116  O   ALA   118       0.450  14.390  28.740  1.00  0.00
ATOM   1117  N   ALA   119      -0.630  12.890  27.440  1.00  0.00
ATOM   1118  HN  ALA   119      -0.630  12.370  26.570  1.00  0.00
ATOM   1119  CA  ALA   119      -1.700  12.720  28.370  1.00  0.00
ATOM   1120  CB  ALA   119      -2.830  11.830  27.820  1.00  0.00
ATOM   1121  C   ALA   119      -1.220  12.090  29.640  1.00  0.00
ATOM   1122  O   ALA   119      -1.480  12.610  30.730  1.00  0.00
ATOM   1123  N   ILE   120      -0.470  10.980  29.550  1.00  0.00
ATOM   1124  HN  ILE   120      -0.190  10.630  28.640  1.00  0.00
ATOM   1125  CA  ILE   120      -0.060  10.310  30.740  1.00  0.00
ATOM   1126  CB  ILE   120       0.690   9.020  30.490  1.00  0.00
ATOM   1127  CG2 ILE   120      -0.260   8.090  29.730  1.00  0.00
ATOM   1128  CG1 ILE   120       2.030   9.230  29.760  1.00  0.00
ATOM   1129  CD1 ILE   120       3.200   9.620  30.670  1.00  0.00
ATOM   1130  C   ILE   120       0.780  11.260  31.520  1.00  0.00
ATOM   1131  O   ILE   120       0.610  11.420  32.730  1.00  0.00
ATOM   1132  N   CYS   121       1.670  11.990  30.840  1.00  0.00
ATOM   1133  HN  CYS   121       1.750  11.880  29.840  1.00  0.00
ATOM   1134  CA  CYS   121       2.510  12.910  31.530  1.00  0.00
ATOM   1135  CB  CYS   121       3.460  13.670  30.590  1.00  0.00
ATOM   1136  SG  CYS   121       4.520  14.850  31.480  1.00  0.00
ATOM   1137  C   CYS   121       1.610  13.910  32.190  1.00  0.00
ATOM   1138  O   CYS   121       1.830  14.300  33.330  1.00  0.00
ATOM   1139  N   LEU   122       0.550  14.330  31.470  1.00  0.00
ATOM   1140  HN  LEU   122       0.400  13.930  30.550  1.00  0.00
ATOM   1141  CA  LEU   122      -0.370  15.320  31.950  1.00  0.00
ATOM   1142  CB  LEU   122      -1.480  15.580  30.900  1.00  0.00
ATOM   1143  CG  LEU   122      -2.570  16.620  31.250  1.00  0.00
ATOM   1144  CD2 LEU   122      -1.950  18.000  31.540  1.00  0.00
ATOM   1145  CD1 LEU   122      -3.510  16.130  32.360  1.00  0.00
ATOM   1146  C   LEU   122      -1.030  14.800  33.190  1.00  0.00
ATOM   1147  O   LEU   122      -1.160  15.510  34.180  1.00  0.00
ATOM   1148  N   ILE   123      -1.480  13.530  33.180  1.00  0.00
ATOM   1149  HN  ILE   123      -1.340  12.970  32.350  1.00  0.00
ATOM   1150  CA  ILE   123      -2.140  12.970  34.320  1.00  0.00
ATOM   1151  CB  ILE   123      -2.830  11.670  34.040  1.00  0.00
ATOM   1152  CG2 ILE   123      -3.910  11.940  32.970  1.00  0.00
ATOM   1153  CG1 ILE   123      -1.830  10.580  33.630  1.00  0.00
ATOM   1154  CD1 ILE   123      -2.460   9.190  33.580  1.00  0.00
ATOM   1155  C   ILE   123      -1.170  12.770  35.440  1.00  0.00
ATOM   1156  O   ILE   123      -1.510  12.960  36.610  1.00  0.00
ATOM   1157  N   ALA   124       0.070  12.360  35.110  1.00  0.00
ATOM   1158  HN  ALA   124       0.320  12.280  34.140  1.00  0.00
ATOM   1159  CA  ALA   124       1.050  12.040  36.110  1.00  0.00
ATOM   1160  CB  ALA   124       2.380  11.570  35.500  1.00  0.00
ATOM   1161  C   ALA   124       1.350  13.240  36.950  1.00  0.00
ATOM   1162  O   ALA   124       1.520  13.120  38.160  1.00  0.00
ATOM   1163  N   PHE   125       1.440  14.440  36.330  1.00  0.00
ATOM   1164  HN  PHE   125       1.260  14.520  35.340  1.00  0.00
ATOM   1165  CA  PHE   125       1.790  15.590  37.110  1.00  0.00
ATOM   1166  CB  PHE   125       2.110  16.900  36.340  1.00  0.00
ATOM   1167  CG  PHE   125       0.900  17.650  35.870  1.00  0.00
ATOM   1168  CD1 PHE   125       0.160  18.440  36.740  1.00  0.00
ATOM   1169  CD2 PHE   125       0.540  17.620  34.550  1.00  0.00
ATOM   1170  CE1 PHE   125      -0.930  19.140  36.310  1.00  0.00
ATOM   1171  CE2 PHE   125      -0.560  18.330  34.110  1.00  0.00
ATOM   1172  CZ  PHE   125      -1.300  19.080  34.990  1.00  0.00
ATOM   1173  C   PHE   125       0.670  15.860  38.050  1.00  0.00
ATOM   1174  O   PHE   125       0.900  16.450  39.110  1.00  0.00
ATOM   1175  N   ALA   126      -0.560  15.520  37.640  1.00  0.00
ATOM   1176  HN  ALA   126      -0.650  15.080  36.740  1.00  0.00
ATOM   1177  CA  ALA   126      -1.760  15.740  38.400  1.00  0.00
ATOM   1178  CB  ALA   126      -3.040  15.340  37.630  1.00  0.00
ATOM   1179  C   ALA   126      -1.750  14.950  39.670  1.00  0.00
ATOM   1180  O   ALA   126      -2.190  15.460  40.700  1.00  0.00
ATOM   1181  N   ILE   127      -1.250  13.700  39.670  1.00  0.00
ATOM   1182  HN  ILE   127      -0.850  13.290  38.830  1.00  0.00
ATOM   1183  CA  ILE   127      -1.320  12.970  40.900  1.00  0.00
ATOM   1184  CB  ILE   127      -1.820  11.560  40.750  1.00  0.00
ATOM   1185  CG2 ILE   127      -3.280  11.630  40.250  1.00  0.00
ATOM   1186  CG1 ILE   127      -0.900  10.720  39.840  1.00  0.00
ATOM   1187  CD1 ILE   127      -1.190   9.220  39.900  1.00  0.00
ATOM   1188  C   ILE   127       0.000  12.970  41.600  1.00  0.00
ATOM   1189  O   ILE   127       0.880  12.150  41.350  1.00  0.00
ATOM   1190  N   GLN   128       0.140  13.910  42.550  1.00  0.00
ATOM   1191  HN  GLN   128      -0.620  14.560  42.730  1.00  0.00
ATOM   1192  CA  GLN   128       1.340  14.010  43.320  1.00  0.00
ATOM   1193  CB  GLN   128       1.860  15.440  43.470  1.00  0.00
ATOM   1194  CG  GLN   128       2.250  16.150  42.170  1.00  0.00
ATOM   1195  CD  GLN   128       2.520  17.580  42.590  1.00  0.00
ATOM   1196  OE1 GLN   128       2.860  18.440  41.770  1.00  0.00
ATOM   1197  NE2 GLN   128       2.350  17.850  43.910  1.00  0.00
ATOM   1198 HE22 GLN   128       2.060  17.110  44.540  1.00  0.00
ATOM   1199 HE21 GLN   128       2.500  18.780  44.260  1.00  0.00
ATOM   1200  C   GLN   128       0.960  13.590  44.690  1.00  0.00
ATOM   1201  O   GLN   128      -0.190  13.750  45.100  1.00  0.00
ATOM   1202  N   ALA   129       1.950  13.060  45.440  1.00  0.00
ATOM   1203  HN  ALA   129       2.870  12.970  45.050  1.00  0.00
ATOM   1204  CA  ALA   129       1.720  12.610  46.790  1.00  0.00
ATOM   1205  CB  ALA   129       2.990  12.060  47.460  1.00  0.00
ATOM   1206  C   ALA   129       1.280  13.800  47.570  1.00  0.00
ATOM   1207  O   ALA   129       0.360  13.720  48.380  1.00  0.00
ATOM   1208  N   SER   130       1.930  14.950  47.320  1.00  0.00
ATOM   1209  HN  SER   130       2.690  14.940  46.650  1.00  0.00
ATOM   1210  CA  SER   130       1.590  16.190  47.950  1.00  0.00
ATOM   1211  CB  SER   130       2.750  17.200  47.920  1.00  0.00
ATOM   1212  OG  SER   130       3.080  17.480  46.570  1.00  0.00
ATOM   1213  HG  SER   130       3.810  18.110  46.540  1.00  0.00
ATOM   1214  C   SER   130       0.500  16.820  47.150  1.00  0.00
ATOM   1215  O   SER   130       0.630  17.040  45.950  1.00  0.00
ATOM   1216  N   GLU   131      -0.600  17.190  47.830  1.00  0.00
ATOM   1217  HN  GLU   131      -0.680  17.000  48.820  1.00  0.00
ATOM   1218  CA  GLU   131      -1.670  17.850  47.150  1.00  0.00
ATOM   1219  CB  GLU   131      -3.010  17.080  47.130  1.00  0.00
ATOM   1220  CG  GLU   131      -3.510  16.600  48.490  1.00  0.00
ATOM   1221  CD  GLU   131      -3.100  15.140  48.650  1.00  0.00
ATOM   1222  OE1 GLU   131      -1.870  14.890  48.790  1.00  0.00
ATOM   1223  OE2 GLU   131      -4.000  14.260  48.610  1.00  0.00
ATOM   1224  C   GLU   131      -1.850  19.150  47.860  1.00  0.00
ATOM   1225  O   GLU   131      -1.440  19.280  49.010  1.00  0.00
ATOM   1226  N   GLY   132      -2.450  20.140  47.180  1.00  0.00
ATOM   1227  HN  GLY   132      -2.780  19.990  46.230  1.00  0.00
ATOM   1228  CA  GLY   132      -2.620  21.420  47.800  1.00  0.00
ATOM   1229  C   GLY   132      -1.270  22.070  47.840  1.00  0.00
ATOM   1230  O   GLY   132      -0.940  22.760  48.800  1.00  0.00
ATOM   1231  N   ASP   133      -0.470  21.840  46.780  1.00  0.00
ATOM   1232  HN  ASP   133      -0.810  21.260  46.030  1.00  0.00
ATOM   1233  CA  ASP   133       0.860  22.390  46.680  1.00  0.00
ATOM   1234  CB  ASP   133       1.700  21.770  45.550  1.00  0.00
ATOM   1235  CG  ASP   133       1.970  20.300  45.840  1.00  0.00
ATOM   1236  OD1 ASP   133       1.030  19.560  46.230  1.00  0.00
ATOM   1237  OD2 ASP   133       3.140  19.880  45.650  1.00  0.00
ATOM   1238  C   ASP   133       0.780  23.840  46.340  1.00  0.00
ATOM   1239  O   ASP   133      -0.060  24.280  45.560  1.00  0.00
ATOM   1240  N   LEU   134       1.690  24.630  46.950  1.00  0.00
ATOM   1241  HN  LEU   134       2.330  24.240  47.620  1.00  0.00
ATOM   1242  CA  LEU   134       1.750  26.030  46.640  1.00  0.00
ATOM   1243  CB  LEU   134       2.020  26.940  47.850  1.00  0.00
ATOM   1244  CG  LEU   134       0.890  26.940  48.910  1.00  0.00
ATOM   1245  CD2 LEU   134       1.050  28.110  49.890  1.00  0.00
ATOM   1246  CD1 LEU   134       0.780  25.580  49.620  1.00  0.00
ATOM   1247  C   LEU   134       2.920  26.170  45.730  1.00  0.00
ATOM   1248  O   LEU   134       3.950  25.510  45.910  1.00  0.00
ATOM   1249  N   THR   135       2.800  27.020  44.690  1.00  0.00
ATOM   1250  HN  THR   135       1.960  27.550  44.550  1.00  0.00
ATOM   1251  CA  THR   135       3.910  27.140  43.800  1.00  0.00
ATOM   1252  CB  THR   135       3.560  26.950  42.340  1.00  0.00
ATOM   1253  OG1 THR   135       4.710  27.080  41.520  1.00  0.00
ATOM   1254  HG1 THR   135       4.460  26.960  40.600  1.00  0.00
ATOM   1255  CG2 THR   135       2.480  27.970  41.930  1.00  0.00
ATOM   1256  C   THR   135       4.480  28.510  43.960  1.00  0.00
ATOM   1257  O   THR   135       3.820  29.420  44.450  1.00  0.00
ATOM   1258  N   THR   136       5.770  28.650  43.590  1.00  0.00
ATOM   1259  HN  THR   136       6.280  27.840  43.270  1.00  0.00
ATOM   1260  CA  THR   136       6.430  29.920  43.630  1.00  0.00
ATOM   1261  CB  THR   136       7.840  29.800  44.150  1.00  0.00
ATOM   1262  OG1 THR   136       7.820  29.070  45.370  1.00  0.00
ATOM   1263  HG1 THR   136       8.720  28.980  45.710  1.00  0.00
ATOM   1264  CG2 THR   136       8.410  31.200  44.460  1.00  0.00
ATOM   1265  C   THR   136       6.440  30.320  42.180  1.00  0.00
ATOM   1266  O   THR   136       5.480  30.030  41.480  1.00  0.00
ATOM   1267  N   ASP   137       7.510  31.000  41.700  1.00  0.00
ATOM   1268  HN  ASP   137       8.250  31.290  42.320  1.00  0.00
ATOM   1269  CA  ASP   137       7.590  31.310  40.300  1.00  0.00
ATOM   1270  CB  ASP   137       8.810  32.170  39.930  1.00  0.00
ATOM   1271  CG  ASP   137       8.550  33.540  40.530  1.00  0.00
ATOM   1272  OD1 ASP   137       7.430  33.720  41.090  1.00  0.00
ATOM   1273  OD2 ASP   137       9.460  34.410  40.450  1.00  0.00
ATOM   1274  C   ASP   137       7.710  29.980  39.640  1.00  0.00
ATOM   1275  O   ASP   137       8.740  29.320  39.700  1.00  0.00
ATOM   1276  N   ASP   138       6.610  29.560  38.990  1.00  0.00
ATOM   1277  HN  ASP   138       5.840  30.200  38.870  1.00  0.00
ATOM   1278  CA  ASP   138       6.500  28.240  38.480  1.00  0.00
ATOM   1279  CB  ASP   138       5.030  27.830  38.270  1.00  0.00
ATOM   1280  CG  ASP   138       4.950  26.320  38.350  1.00  0.00
ATOM   1281  OD1 ASP   138       5.520  25.660  37.440  1.00  0.00
ATOM   1282  OD2 ASP   138       4.340  25.790  39.320  1.00  0.00
ATOM   1283  C   ASP   138       7.270  28.100  37.200  1.00  0.00
ATOM   1284  O   ASP   138       7.270  28.980  36.340  1.00  0.00
ATOM   1285  N   ASN   139       7.960  26.950  37.080  1.00  0.00
ATOM   1286  HN  ASN   139       7.900  26.280  37.830  1.00  0.00
ATOM   1287  CA  ASN   139       8.790  26.610  35.960  1.00  0.00
ATOM   1288  CB  ASN   139      10.000  25.740  36.350  1.00  0.00
ATOM   1289  CG  ASN   139      10.870  26.540  37.310  1.00  0.00
ATOM   1290  OD1 ASN   139      10.610  27.710  37.570  1.00  0.00
ATOM   1291  ND2 ASN   139      11.930  25.890  37.860  1.00  0.00
ATOM   1292 HD22 ASN   139      12.110  24.920  37.630  1.00  0.00
ATOM   1293 HD21 ASN   139      12.540  26.370  38.510  1.00  0.00
ATOM   1294  C   ASN   139       7.960  25.810  34.990  1.00  0.00
ATOM   1295  O   ASN   139       6.800  25.500  35.250  1.00  0.00
ATOM   1296  N   LEU   140       8.560  25.470  33.830  1.00  0.00
ATOM   1297  HN  LEU   140       9.520  25.750  33.690  1.00  0.00
ATOM   1298  CA  LEU   140       7.910  24.730  32.780  1.00  0.00
ATOM   1299  CB  LEU   140       8.650  24.760  31.430  1.00  0.00
ATOM   1300  CG  LEU   140       8.620  26.120  30.710  1.00  0.00
ATOM   1301  CD2 LEU   140       9.300  27.220  31.530  1.00  0.00
ATOM   1302  CD1 LEU   140       7.190  26.490  30.280  1.00  0.00
ATOM   1303  C   LEU   140       7.750  23.290  33.180  1.00  0.00
ATOM   1304  O   LEU   140       8.560  22.720  33.900  1.00  0.00
ATOM   1305  N   TYR   141       6.670  22.670  32.680  1.00  0.00
ATOM   1306  HN  TYR   141       6.050  23.150  32.050  1.00  0.00
ATOM   1307  CA  TYR   141       6.400  21.320  33.060  1.00  0.00
ATOM   1308  CB  TYR   141       4.950  21.060  33.500  1.00  0.00
ATOM   1309  CG  TYR   141       4.700  21.670  34.840  1.00  0.00
ATOM   1310  CD1 TYR   141       5.050  20.980  35.990  1.00  0.00
ATOM   1311  CD2 TYR   141       4.110  22.900  34.970  1.00  0.00
ATOM   1312  CE1 TYR   141       4.830  21.520  37.230  1.00  0.00
ATOM   1313  CE2 TYR   141       3.880  23.450  36.210  1.00  0.00
ATOM   1314  CZ  TYR   141       4.240  22.760  37.340  1.00  0.00
ATOM   1315  OH  TYR   141       4.000  23.340  38.610  1.00  0.00
ATOM   1316  HH  TYR   141       3.590  24.200  38.490  1.00  0.00
ATOM   1317  C   TYR   141       6.610  20.460  31.860  1.00  0.00
ATOM   1318  O   TYR   141       6.310  20.850  30.730  1.00  0.00
ATOM   1319  N   LEU   142       7.060  19.210  32.150  1.00  0.00
ATOM   1320  HN  LEU   142       7.210  18.950  33.120  1.00  0.00
ATOM   1321  CA  LEU   142       7.340  18.250  31.110  1.00  0.00
ATOM   1322  CB  LEU   142       7.610  16.830  31.640  1.00  0.00
ATOM   1323  CG  LEU   142       7.870  15.820  30.510  1.00  0.00
ATOM   1324  CD2 LEU   142       7.950  14.390  31.060  1.00  0.00
ATOM   1325  CD1 LEU   142       9.090  16.200  29.660  1.00  0.00
ATOM   1326  C   LEU   142       6.190  18.150  30.150  1.00  0.00
ATOM   1327  O   LEU   142       6.400  18.210  28.940  1.00  0.00
ATOM   1328  N   ALA   143       4.950  18.030  30.650  1.00  0.00
ATOM   1329  HN  ALA   143       4.790  18.040  31.640  1.00  0.00
ATOM   1330  CA  ALA   143       3.830  17.860  29.750  1.00  0.00
ATOM   1331  CB  ALA   143       2.500  17.670  30.500  1.00  0.00
ATOM   1332  C   ALA   143       3.690  19.080  28.890  1.00  0.00
ATOM   1333  O   ALA   143       3.530  18.980  27.670  1.00  0.00
ATOM   1334  N   LEU   144       3.810  20.270  29.480  1.00  0.00
ATOM   1335  HN  LEU   144       4.040  20.330  30.460  1.00  0.00
ATOM   1336  CA  LEU   144       3.600  21.460  28.710  1.00  0.00
ATOM   1337  CB  LEU   144       3.710  22.760  29.540  1.00  0.00
ATOM   1338  CG  LEU   144       2.590  22.910  30.570  1.00  0.00
ATOM   1339  CD2 LEU   144       1.200  22.640  29.960  1.00  0.00
ATOM   1340  CD1 LEU   144       2.660  24.280  31.280  1.00  0.00
ATOM   1341  C   LEU   144       4.610  21.500  27.620  1.00  0.00
ATOM   1342  O   LEU   144       4.320  21.940  26.510  1.00  0.00
ATOM   1343  N   ALA   145       5.840  21.030  27.900  1.00  0.00
ATOM   1344  HN  ALA   145       6.050  20.650  28.810  1.00  0.00
ATOM   1345  CA  ALA   145       6.850  21.070  26.890  1.00  0.00
ATOM   1346  CB  ALA   145       8.200  20.520  27.380  1.00  0.00
ATOM   1347  C   ALA   145       6.430  20.230  25.720  1.00  0.00
ATOM   1348  O   ALA   145       6.440  20.690  24.580  1.00  0.00
ATOM   1349  N   LEU   146       5.980  18.980  25.970  1.00  0.00
ATOM   1350  HN  LEU   146       5.870  18.660  26.920  1.00  0.00
ATOM   1351  CA  LEU   146       5.670  18.120  24.870  1.00  0.00
ATOM   1352  CB  LEU   146       5.170  16.730  25.310  1.00  0.00
ATOM   1353  CG  LEU   146       6.250  15.870  25.990  1.00  0.00
ATOM   1354  CD2 LEU   146       7.500  15.740  25.120  1.00  0.00
ATOM   1355  CD1 LEU   146       5.680  14.510  26.410  1.00  0.00
ATOM   1356  C   LEU   146       4.580  18.740  24.050  1.00  0.00
ATOM   1357  O   LEU   146       4.720  18.930  22.840  1.00  0.00
ATOM   1358  N   ILE   147       3.490  19.170  24.700  1.00  0.00
ATOM   1359  HN  ILE   147       3.460  19.130  25.710  1.00  0.00
ATOM   1360  CA  ILE   147       2.360  19.690  23.980  1.00  0.00
ATOM   1361  CB  ILE   147       1.250  20.150  24.890  1.00  0.00
ATOM   1362  CG2 ILE   147       1.750  21.350  25.710  1.00  0.00
ATOM   1363  CG1 ILE   147      -0.020  20.430  24.070  1.00  0.00
ATOM   1364  CD1 ILE   147      -1.280  20.620  24.920  1.00  0.00
ATOM   1365  C   ILE   147       2.820  20.860  23.180  1.00  0.00
ATOM   1366  O   ILE   147       2.360  21.060  22.050  1.00  0.00
ATOM   1367  N   ALA   148       3.740  21.660  23.730  1.00  0.00
ATOM   1368  HN  ALA   148       4.120  21.440  24.640  1.00  0.00
ATOM   1369  CA  ALA   148       4.180  22.820  23.020  1.00  0.00
ATOM   1370  CB  ALA   148       5.240  23.620  23.790  1.00  0.00
ATOM   1371  C   ALA   148       4.790  22.400  21.720  1.00  0.00
ATOM   1372  O   ALA   148       4.550  23.020  20.690  1.00  0.00
ATOM   1373  N   VAL   149       5.610  21.330  21.720  1.00  0.00
ATOM   1374  HN  VAL   149       5.780  20.800  22.570  1.00  0.00
ATOM   1375  CA  VAL   149       6.230  20.950  20.490  1.00  0.00
ATOM   1376  CB  VAL   149       7.260  19.860  20.600  1.00  0.00
ATOM   1377  CG1 VAL   149       8.320  20.300  21.620  1.00  0.00
ATOM   1378  CG2 VAL   149       6.590  18.510  20.890  1.00  0.00
ATOM   1379  C   VAL   149       5.160  20.480  19.550  1.00  0.00
ATOM   1380  O   VAL   149       5.220  20.750  18.350  1.00  0.00
ATOM   1381  N   VAL   150       4.160  19.760  20.070  1.00  0.00
ATOM   1382  HN  VAL   150       4.140  19.580  21.070  1.00  0.00
ATOM   1383  CA  VAL   150       3.120  19.240  19.240  1.00  0.00
ATOM   1384  CB  VAL   150       2.100  18.450  20.000  1.00  0.00
ATOM   1385  CG1 VAL   150       0.990  18.030  19.030  1.00  0.00
ATOM   1386  CG2 VAL   150       2.810  17.270  20.680  1.00  0.00
ATOM   1387  C   VAL   150       2.420  20.390  18.590  1.00  0.00
ATOM   1388  O   VAL   150       2.150  20.360  17.380  1.00  0.00
ATOM   1389  N   VAL   151       2.080  21.440  19.360  1.00  0.00
ATOM   1390  HN  VAL   151       2.350  21.450  20.340  1.00  0.00
ATOM   1391  CA  VAL   151       1.350  22.560  18.820  1.00  0.00
ATOM   1392  CB  VAL   151       0.870  23.530  19.860  1.00  0.00
ATOM   1393  CG1 VAL   151      -0.080  22.800  20.820  1.00  0.00
ATOM   1394  CG2 VAL   151       2.080  24.190  20.550  1.00  0.00
ATOM   1395  C   VAL   151       2.190  23.300  17.830  1.00  0.00
ATOM   1396  O   VAL   151       1.720  23.630  16.740  1.00  0.00
ATOM   1397  N   VAL   152       3.460  23.560  18.160  1.00  0.00
ATOM   1398  HN  VAL   152       3.830  23.200  19.030  1.00  0.00
ATOM   1399  CA  VAL   152       4.300  24.330  17.290  1.00  0.00
ATOM   1400  CB  VAL   152       5.700  24.470  17.810  1.00  0.00
ATOM   1401  CG1 VAL   152       6.550  25.200  16.760  1.00  0.00
ATOM   1402  CG2 VAL   152       5.640  25.180  19.170  1.00  0.00
ATOM   1403  C   VAL   152       4.370  23.600  15.990  1.00  0.00
ATOM   1404  O   VAL   152       4.440  24.220  14.930  1.00  0.00
ATOM   1405  N   THR   153       4.360  22.260  16.040  1.00  0.00
ATOM   1406  HN  THR   153       4.280  21.800  16.940  1.00  0.00
ATOM   1407  CA  THR   153       4.470  21.480  14.850  1.00  0.00
ATOM   1408  CB  THR   153       4.450  20.000  15.130  1.00  0.00
ATOM   1409  OG1 THR   153       5.510  19.650  16.000  1.00  0.00
ATOM   1410  HG1 THR   153       5.480  18.700  16.170  1.00  0.00
ATOM   1411  CG2 THR   153       4.590  19.240  13.800  1.00  0.00
ATOM   1412  C   THR   153       3.320  21.780  13.940  1.00  0.00
ATOM   1413  O   THR   153       3.520  22.070  12.760  1.00  0.00
ATOM   1414  N   GLY   154       2.090  21.770  14.480  1.00  0.00
ATOM   1415  HN  GLY   154       1.990  21.610  15.480  1.00  0.00
ATOM   1416  CA  GLY   154       0.910  21.980  13.690  1.00  0.00
ATOM   1417  C   GLY   154       0.970  23.340  13.080  1.00  0.00
ATOM   1418  O   GLY   154       0.520  23.550  11.950  1.00  0.00
ATOM   1419  N   CYS   155       1.520  24.320  13.820  1.00  0.00
ATOM   1420  HN  CYS   155       1.930  24.100  14.710  1.00  0.00
ATOM   1421  CA  CYS   155       1.520  25.660  13.330  1.00  0.00
ATOM   1422  CB  CYS   155       2.260  26.630  14.280  1.00  0.00
ATOM   1423  SG  CYS   155       1.460  26.740  15.910  1.00  0.00
ATOM   1424  C   CYS   155       2.220  25.700  12.010  1.00  0.00
ATOM   1425  O   CYS   155       1.700  26.240  11.030  1.00  0.00
ATOM   1426  N   PHE   156       3.410  25.080  11.920  1.00  0.00
ATOM   1427  HN  PHE   156       3.770  24.570  12.720  1.00  0.00
ATOM   1428  CA  PHE   156       4.160  25.140  10.710  1.00  0.00
ATOM   1429  CB  PHE   156       5.540  24.450  10.810  1.00  0.00
ATOM   1430  CG  PHE   156       6.270  24.700   9.530  1.00  0.00
ATOM   1431  CD1 PHE   156       6.830  25.940   9.280  1.00  0.00
ATOM   1432  CD2 PHE   156       6.420  23.700   8.600  1.00  0.00
ATOM   1433  CE1 PHE   156       7.510  26.180   8.110  1.00  0.00
ATOM   1434  CE2 PHE   156       7.100  23.940   7.420  1.00  0.00
ATOM   1435  CZ  PHE   156       7.640  25.180   7.180  1.00  0.00
ATOM   1436  C   PHE   156       3.380  24.470   9.620  1.00  0.00
ATOM   1437  O   PHE   156       3.340  24.950   8.490  1.00  0.00
ATOM   1438  N   GLY   157       2.720  23.350   9.950  1.00  0.00
ATOM   1439  HN  GLY   157       2.710  23.040  10.910  1.00  0.00
ATOM   1440  CA  GLY   157       2.020  22.590   8.960  1.00  0.00
ATOM   1441  C   GLY   157       0.970  23.430   8.300  1.00  0.00
ATOM   1442  O   GLY   157       0.730  23.300   7.100  1.00  0.00
ATOM   1443  N   TYR   158       0.250  24.270   9.070  1.00  0.00
ATOM   1444  HN  TYR   158       0.420  24.340  10.060  1.00  0.00
ATOM   1445  CA  TYR   158      -0.780  25.070   8.450  1.00  0.00
ATOM   1446  CB  TYR   158      -1.820  25.680   9.410  1.00  0.00
ATOM   1447  CG  TYR   158      -1.260  26.790  10.240  1.00  0.00
ATOM   1448  CD1 TYR   158      -1.070  28.040   9.710  1.00  0.00
ATOM   1449  CD2 TYR   158      -0.970  26.580  11.570  1.00  0.00
ATOM   1450  CE1 TYR   158      -0.560  29.070  10.470  1.00  0.00
ATOM   1451  CE2 TYR   158      -0.460  27.600  12.340  1.00  0.00
ATOM   1452  CZ  TYR   158      -0.250  28.850  11.790  1.00  0.00
ATOM   1453  OH  TYR   158       0.270  29.890  12.580  1.00  0.00
ATOM   1454  HH  TYR   158       0.430  29.570  13.470  1.00  0.00
ATOM   1455  C   TYR   158      -0.180  26.160   7.630  1.00  0.00
ATOM   1456  O   TYR   158      -0.720  26.530   6.590  1.00  0.00
ATOM   1457  N   TYR   159       0.970  26.700   8.070  1.00  0.00
ATOM   1458  HN  TYR   159       1.430  26.250   8.850  1.00  0.00
ATOM   1459  CA  TYR   159       1.570  27.870   7.510  1.00  0.00
ATOM   1460  CB  TYR   159       2.910  28.160   8.210  1.00  0.00
ATOM   1461  CG  TYR   159       3.520  29.420   7.710  1.00  0.00
ATOM   1462  CD1 TYR   159       3.070  30.630   8.180  1.00  0.00
ATOM   1463  CD2 TYR   159       4.560  29.400   6.810  1.00  0.00
ATOM   1464  CE1 TYR   159       3.630  31.810   7.740  1.00  0.00
ATOM   1465  CE2 TYR   159       5.130  30.570   6.370  1.00  0.00
ATOM   1466  CZ  TYR   159       4.660  31.770   6.830  1.00  0.00
ATOM   1467  OH  TYR   159       5.240  32.980   6.380  1.00  0.00
ATOM   1468  HH  TYR   159       5.950  32.780   5.760  1.00  0.00
ATOM   1469  C   TYR   159       1.830  27.690   6.050  1.00  0.00
ATOM   1470  O   TYR   159       1.530  28.590   5.260  1.00  0.00
ATOM   1471  N   GLN   160       2.400  26.540   5.630  1.00  0.00
ATOM   1472  HN  GLN   160       2.590  25.810   6.300  1.00  0.00
ATOM   1473  CA  GLN   160       2.740  26.360   4.250  1.00  0.00
ATOM   1474  CB  GLN   160       3.700  25.190   3.990  1.00  0.00
ATOM   1475  CG  GLN   160       4.080  25.050   2.510  1.00  0.00
ATOM   1476  CD  GLN   160       5.000  26.200   2.120  1.00  0.00
ATOM   1477  OE1 GLN   160       6.110  25.980   1.630  1.00  0.00
ATOM   1478  NE2 GLN   160       4.540  27.470   2.320  1.00  0.00
ATOM   1479 HE22 GLN   160       3.620  27.610   2.720  1.00  0.00
ATOM   1480 HE21 GLN   160       5.110  28.260   2.070  1.00  0.00
ATOM   1481  C   GLN   160       1.540  26.170   3.360  1.00  0.00
ATOM   1482  O   GLN   160       1.490  26.690   2.250  1.00  0.00
ATOM   1483  N   GLU   161       0.530  25.430   3.850  1.00  0.00
ATOM   1484  HN  GLU   161       0.560  25.140   4.820  1.00  0.00
ATOM   1485  CA  GLU   161      -0.590  25.040   3.040  1.00  0.00
ATOM   1486  CB  GLU   161      -1.590  24.160   3.810  1.00  0.00
ATOM   1487  CG  GLU   161      -2.370  23.220   2.890  1.00  0.00
ATOM   1488  CD  GLU   161      -1.390  22.140   2.460  1.00  0.00
ATOM   1489  OE1 GLU   161      -0.190  22.230   2.850  1.00  0.00
ATOM   1490  OE2 GLU   161      -1.820  21.210   1.720  1.00  0.00
ATOM   1491  C   GLU   161      -1.290  26.260   2.550  1.00  0.00
ATOM   1492  O   GLU   161      -1.880  26.250   1.470  1.00  0.00
ATOM   1493  N   PHE   162      -1.270  27.350   3.340  1.00  0.00
ATOM   1494  HN  PHE   162      -0.800  27.310   4.240  1.00  0.00
ATOM   1495  CA  PHE   162      -1.920  28.550   2.920  1.00  0.00
ATOM   1496  CB  PHE   162      -1.760  29.690   3.940  1.00  0.00
ATOM   1497  CG  PHE   162      -2.340  30.910   3.320  1.00  0.00
ATOM   1498  CD1 PHE   162      -3.680  31.170   3.380  1.00  0.00
ATOM   1499  CD2 PHE   162      -1.510  31.800   2.670  1.00  0.00
ATOM   1500  CE1 PHE   162      -4.210  32.300   2.800  1.00  0.00
ATOM   1501  CE2 PHE   162      -2.030  32.940   2.090  1.00  0.00
ATOM   1502  CZ  PHE   162      -3.380  33.190   2.160  1.00  0.00
ATOM   1503  C   PHE   162      -1.300  29.030   1.640  1.00  0.00
ATOM   1504  O   PHE   162      -2.000  29.280   0.660  1.00  0.00
ATOM   1505  N   LYS   163       0.040  29.170   1.620  1.00  0.00
ATOM   1506  HN  LYS   163       0.560  28.930   2.450  1.00  0.00
ATOM   1507  CA  LYS   163       0.750  29.660   0.470  1.00  0.00
ATOM   1508  CB  LYS   163       2.230  29.980   0.740  1.00  0.00
ATOM   1509  CG  LYS   163       2.450  31.230   1.590  1.00  0.00
ATOM   1510  CD  LYS   163       3.910  31.430   2.000  1.00  0.00
ATOM   1511  CE  LYS   163       4.160  32.700   2.820  1.00  0.00
ATOM   1512  NZ  LYS   163       5.580  32.800   3.190  1.00  0.00
ATOM   1513  HZ1 LYS   163       5.850  31.980   3.740  1.00  0.00
ATOM   1514  HZ2 LYS   163       6.150  32.830   2.350  1.00  0.00
ATOM   1515  HZ3 LYS   163       5.740  33.640   3.730  1.00  0.00
ATOM   1516  C   LYS   163       0.720  28.660  -0.640  1.00  0.00
ATOM   1517  O   LYS   163       0.650  29.050  -1.810  1.00  0.00
ATOM   1518  N   SER   164       0.770  27.360  -0.310  1.00  0.00
ATOM   1519  HN  SER   164       0.720  27.100   0.670  1.00  0.00
ATOM   1520  CA  SER   164       0.900  26.330  -1.300  1.00  0.00
ATOM   1521  CB  SER   164       0.780  24.910  -0.720  1.00  0.00
ATOM   1522  OG  SER   164       1.820  24.680   0.210  1.00  0.00
ATOM   1523  HG  SER   164       1.740  23.790   0.570  1.00  0.00
ATOM   1524  C   SER   164      -0.150  26.500  -2.350  1.00  0.00
ATOM   1525  O   SER   164      -1.350  26.350  -2.110  1.00  0.00
ATOM   1526  N   THR   165       0.290  26.830  -3.580  1.00  0.00
ATOM   1527  HN  THR   165       1.290  26.930  -3.740  1.00  0.00
ATOM   1528  CA  THR   165      -0.620  27.030  -4.660  1.00  0.00
ATOM   1529  CB  THR   165      -0.350  28.270  -5.470  1.00  0.00
ATOM   1530  OG1 THR   165       0.930  28.190  -6.070  1.00  0.00
ATOM   1531  HG1 THR   165       1.090  28.980  -6.580  1.00  0.00
ATOM   1532  CG2 THR   165      -0.440  29.500  -4.540  1.00  0.00
ATOM   1533  C   THR   165      -0.500  25.870  -5.580  1.00  0.00
ATOM   1534  O   THR   165       0.500  25.150  -5.580  1.00  0.00
ATOM   1535  N   ASN   166      -1.550  25.650  -6.390  1.00  0.00
ATOM   1536  HN  ASN   166      -2.350  26.270  -6.350  1.00  0.00
ATOM   1537  CA  ASN   166      -1.560  24.550  -7.300  1.00  0.00
ATOM   1538  CB  ASN   166      -2.640  23.500  -6.980  1.00  0.00
ATOM   1539  CG  ASN   166      -4.000  24.200  -6.950  1.00  0.00
ATOM   1540  OD1 ASN   166      -4.140  25.270  -6.370  1.00  0.00
ATOM   1541  ND2 ASN   166      -5.020  23.580  -7.590  1.00  0.00
ATOM   1542 HD22 ASN   166      -4.860  22.690  -8.050  1.00  0.00
ATOM   1543 HD21 ASN   166      -5.940  23.990  -7.600  1.00  0.00
ATOM   1544  C   ASN   166      -1.790  25.080  -8.680  1.00  0.00
ATOM   1545  O   ASN   166      -2.250  26.200  -8.870  1.00  0.00
ATOM   1546  N   ILE   167      -1.430  24.260  -9.690  1.00  0.00
ATOM   1547  HN  ILE   167      -1.050  23.360  -9.450  1.00  0.00
ATOM   1548  CA  ILE   167      -1.550  24.580 -11.090  1.00  0.00
ATOM   1549  CB  ILE   167      -0.940  23.550 -11.980  1.00  0.00
ATOM   1550  CG2 ILE   167      -1.590  22.190 -11.680  1.00  0.00
ATOM   1551  CG1 ILE   167      -1.050  24.000 -13.450  1.00  0.00
ATOM   1552  CD1 ILE   167      -0.310  23.090 -14.440  1.00  0.00
ATOM   1553  C   ILE   167      -2.990  24.700 -11.500  1.00  0.00
ATOM   1554  O   ILE   167      -3.350  25.610 -12.240  1.00  0.00
ATOM   1555  N   ILE   168      -3.840  23.790 -11.010  1.00  0.00
ATOM   1556  HN  ILE   168      -3.520  23.100 -10.350  1.00  0.00
ATOM   1557  CA  ILE   168      -5.220  23.760 -11.430  1.00  0.00
ATOM   1558  CB  ILE   168      -6.050  22.750 -10.670  1.00  0.00
ATOM   1559  CG2 ILE   168      -7.520  22.970 -11.060  1.00  0.00
ATOM   1560  CG1 ILE   168      -5.550  21.320 -10.950  1.00  0.00
ATOM   1561  CD1 ILE   168      -5.720  20.890 -12.400  1.00  0.00
ATOM   1562  C   ILE   168      -5.800  25.100 -11.100  1.00  0.00
ATOM   1563  O   ILE   168      -6.610  25.640 -11.850  1.00  0.00
ATOM   1564  N   ALA   169      -5.360  25.670  -9.970  1.00  0.00
ATOM   1565  HN  ALA   169      -4.670  25.190  -9.410  1.00  0.00
ATOM   1566  CA  ALA   169      -5.850  26.950  -9.530  1.00  0.00
ATOM   1567  CB  ALA   169      -5.170  27.420  -8.240  1.00  0.00
ATOM   1568  C   ALA   169      -5.550  27.960 -10.590  1.00  0.00
ATOM   1569  O   ALA   169      -6.320  28.900 -10.790  1.00  0.00
ATOM   1570  N   SER   170      -4.420  27.810 -11.290  1.00  0.00
ATOM   1571  HN  SER   170      -3.840  27.010 -11.100  1.00  0.00
ATOM   1572  CA  SER   170      -3.980  28.740 -12.300  1.00  0.00
ATOM   1573  CB  SER   170      -2.560  28.440 -12.800  1.00  0.00
ATOM   1574  OG  SER   170      -2.190  29.390 -13.790  1.00  0.00
ATOM   1575  HG  SER   170      -1.300  29.200 -14.100  1.00  0.00
ATOM   1576  C   SER   170      -4.880  28.750 -13.510  1.00  0.00
ATOM   1577  O   SER   170      -5.120  29.800 -14.100  1.00  0.00
ATOM   1578  N   PHE   171      -5.440  27.590 -13.910  1.00  0.00
ATOM   1579  HN  PHE   171      -5.310  26.760 -13.350  1.00  0.00
ATOM   1580  CA  PHE   171      -6.210  27.510 -15.130  1.00  0.00
ATOM   1581  CB  PHE   171      -6.890  26.140 -15.340  1.00  0.00
ATOM   1582  CG  PHE   171      -5.850  25.090 -15.520  1.00  0.00
ATOM   1583  CD1 PHE   171      -5.320  24.430 -14.440  1.00  0.00
ATOM   1584  CD2 PHE   171      -5.410  24.760 -16.780  1.00  0.00
ATOM   1585  CE1 PHE   171      -4.360  23.460 -14.610  1.00  0.00
ATOM   1586  CE2 PHE   171      -4.450  23.790 -16.960  1.00  0.00
ATOM   1587  CZ  PHE   171      -3.930  23.140 -15.870  1.00  0.00
ATOM   1588  C   PHE   171      -7.340  28.490 -15.050  1.00  0.00
ATOM   1589  O   PHE   171      -7.620  29.210 -16.000  1.00  0.00
ATOM   1590  N   LYS   172      -8.000  28.560 -13.890  1.00  0.00
ATOM   1591  HN  LYS   172      -7.680  28.020 -13.100  1.00  0.00
ATOM   1592  CA  LYS   172      -9.160  29.390 -13.730  1.00  0.00
ATOM   1593  CB  LYS   172      -9.750  29.350 -12.320  1.00  0.00
ATOM   1594  CG  LYS   172     -10.300  27.960 -11.970  1.00  0.00
ATOM   1595  CD  LYS   172     -10.710  27.780 -10.510  1.00  0.00
ATOM   1596  CE  LYS   172     -12.220  27.620 -10.310  1.00  0.00
ATOM   1597  NZ  LYS   172     -12.930  28.850 -10.720  1.00  0.00
ATOM   1598  HZ1 LYS   172     -12.600  29.630 -10.160  1.00  0.00
ATOM   1599  HZ2 LYS   172     -12.740  29.040 -11.700  1.00  0.00
ATOM   1600  HZ3 LYS   172     -13.930  28.730 -10.580  1.00  0.00
ATOM   1601  C   LYS   172      -8.760  30.800 -14.070  1.00  0.00
ATOM   1602  O   LYS   172      -9.590  31.590 -14.510  1.00  0.00
ATOM   1603  N   ASN   173      -7.480  31.130 -13.860  1.00  0.00
ATOM   1604  HN  ASN   173      -6.850  30.430 -13.500  1.00  0.00
ATOM   1605  CA  ASN   173      -6.970  32.440 -14.140  1.00  0.00
ATOM   1606  CB  ASN   173      -5.480  32.580 -13.780  1.00  0.00
ATOM   1607  CG  ASN   173      -5.330  32.510 -12.270  1.00  0.00
ATOM   1608  OD1 ASN   173      -6.000  33.230 -11.540  1.00  0.00
ATOM   1609  ND2 ASN   173      -4.440  31.610 -11.790  1.00  0.00
ATOM   1610 HD22 ASN   173      -3.900  31.030 -12.420  1.00  0.00
ATOM   1611 HD21 ASN   173      -4.300  31.520 -10.790  1.00  0.00
ATOM   1612  C   ASN   173      -7.100  32.750 -15.600  1.00  0.00
ATOM   1613  O   ASN   173      -7.260  33.900 -15.980  1.00  0.00
ATOM   1614  N   LEU   174      -7.000  31.720 -16.470  1.00  0.00
ATOM   1615  HN  LEU   174      -6.880  30.790 -16.080  1.00  0.00
ATOM   1616  CA  LEU   174      -7.020  31.830 -17.910  1.00  0.00
ATOM   1617  CB  LEU   174      -6.580  30.530 -18.600  1.00  0.00
ATOM   1618  CG  LEU   174      -5.100  30.190 -18.360  1.00  0.00
ATOM   1619  CD2 LEU   174      -4.190  31.380 -18.720  1.00  0.00
ATOM   1620  CD1 LEU   174      -4.700  28.900 -19.090  1.00  0.00
ATOM   1621  C   LEU   174      -8.360  32.220 -18.490  1.00  0.00
ATOM   1622  O   LEU   174      -8.400  32.900 -19.510  1.00  0.00
ATOM   1623  N   VAL   175      -9.490  31.770 -17.890  1.00  0.00
ATOM   1624  HN  VAL   175      -9.410  31.220 -17.050  1.00  0.00
ATOM   1625  CA  VAL   175     -10.790  32.050 -18.440  1.00  0.00
ATOM   1626  CB  VAL   175     -11.870  31.190 -17.860  1.00  0.00
ATOM   1627  CG1 VAL   175     -13.210  31.590 -18.510  1.00  0.00
ATOM   1628  CG2 VAL   175     -11.490  29.710 -18.010  1.00  0.00
ATOM   1629  C   VAL   175     -11.180  33.460 -18.100  1.00  0.00
ATOM   1630  O   VAL   175     -11.010  33.910 -16.970  1.00  0.00
ATOM   1631  N   PRO   176     -11.740  34.170 -19.060  1.00  0.00
ATOM   1632  CA  PRO   176     -12.150  35.550 -18.900  1.00  0.00
ATOM   1633  CD  PRO   176     -11.630  33.780 -20.450  1.00  0.00
ATOM   1634  CB  PRO   176     -12.310  36.090 -20.320  1.00  0.00
ATOM   1635  CG  PRO   176     -12.440  34.840 -21.210  1.00  0.00
ATOM   1636  C   PRO   176     -13.390  35.720 -18.070  1.00  0.00
ATOM   1637  O   PRO   176     -14.120  34.750 -17.860  1.00  0.00
ATOM   1638  N   GLN   177     -13.600  36.940 -17.530  1.00  0.00
ATOM   1639  HN  GLN   177     -12.910  37.660 -17.700  1.00  0.00
ATOM   1640  CA  GLN   177     -14.740  37.300 -16.730  1.00  0.00
ATOM   1641  CB  GLN   177     -14.540  38.620 -15.970  1.00  0.00
ATOM   1642  CG  GLN   177     -15.740  39.030 -15.100  1.00  0.00
ATOM   1643  CD  GLN   177     -15.420  40.350 -14.400  1.00  0.00
ATOM   1644  OE1 GLN   177     -16.310  41.180 -14.200  1.00  0.00
ATOM   1645  NE2 GLN   177     -14.130  40.540 -14.010  1.00  0.00
ATOM   1646 HE22 GLN   177     -13.440  39.830 -14.190  1.00  0.00
ATOM   1647 HE21 GLN   177     -13.870  41.390 -13.540  1.00  0.00
ATOM   1648  C   GLN   177     -15.990  37.460 -17.550  1.00  0.00
ATOM   1649  O   GLN   177     -17.060  37.000 -17.150  1.00  0.00
ATOM   1650  N   GLN   178     -15.910  38.120 -18.730  1.00  0.00
ATOM   1651  HN  GLN   178     -15.000  38.400 -19.090  1.00  0.00
ATOM   1652  CA  GLN   178     -17.110  38.420 -19.470  1.00  0.00
ATOM   1653  CB  GLN   178     -17.470  39.910 -19.390  1.00  0.00
ATOM   1654  CG  GLN   178     -17.720  40.390 -17.960  1.00  0.00
ATOM   1655  CD  GLN   178     -17.920  41.900 -17.980  1.00  0.00
ATOM   1656  OE1 GLN   178     -18.470  42.450 -18.930  1.00  0.00
ATOM   1657  NE2 GLN   178     -17.450  42.590 -16.910  1.00  0.00
ATOM   1658 HE22 GLN   178     -17.000  42.090 -16.150  1.00  0.00
ATOM   1659 HE21 GLN   178     -17.550  43.590 -16.860  1.00  0.00
ATOM   1660  C   GLN   178     -16.890  38.080 -20.910  1.00  0.00
ATOM   1661  O   GLN   178     -15.760  37.860 -21.340  1.00  0.00
ATOM   1662  N   ALA   179     -17.990  38.000 -21.690  1.00  0.00
ATOM   1663  HN  ALA   179     -18.910  38.190 -21.310  1.00  0.00
ATOM   1664  CA  ALA   179     -17.850  37.660 -23.080  1.00  0.00
ATOM   1665  CB  ALA   179     -17.920  36.150 -23.350  1.00  0.00
ATOM   1666  C   ALA   179     -18.940  38.300 -23.880  1.00  0.00
ATOM   1667  O   ALA   179     -19.990  38.670 -23.360  1.00  0.00
ATOM   1668  N   THR   180     -18.710  38.420 -25.210  1.00  0.00
ATOM   1669  HN  THR   180     -17.840  38.100 -25.600  1.00  0.00
ATOM   1670  CA  THR   180     -19.690  39.020 -26.080  1.00  0.00
ATOM   1671  CB  THR   180     -19.100  39.960 -27.090  1.00  0.00
ATOM   1672  OG1 THR   180     -18.420  41.020 -26.430  1.00  0.00
ATOM   1673  HG1 THR   180     -18.040  41.610 -27.090  1.00  0.00
ATOM   1674  CG2 THR   180     -20.240  40.530 -27.960  1.00  0.00
ATOM   1675  C   THR   180     -20.370  37.920 -26.830  1.00  0.00
ATOM   1676  O   THR   180     -19.720  37.110 -27.500  1.00  0.00
ATOM   1677  N   VAL   181     -21.710  37.860 -26.730  1.00  0.00
ATOM   1678  HN  VAL   181     -22.200  38.540 -26.170  1.00  0.00
ATOM   1679  CA  VAL   181     -22.450  36.830 -27.400  1.00  0.00
ATOM   1680  CB  VAL   181     -22.950  35.770 -26.460  1.00  0.00
ATOM   1681  CG1 VAL   181     -21.740  35.070 -25.820  1.00  0.00
ATOM   1682  CG2 VAL   181     -23.890  36.420 -25.430  1.00  0.00
ATOM   1683  C   VAL   181     -23.650  37.470 -28.030  1.00  0.00
ATOM   1684  O   VAL   181     -24.110  38.510 -27.580  1.00  0.00
ATOM   1685  N   ILE   182     -24.170  36.860 -29.120  1.00  0.00
ATOM   1686  HN  ILE   182     -23.750  36.030 -29.510  1.00  0.00
ATOM   1687  CA  ILE   182     -25.340  37.440 -29.720  1.00  0.00
ATOM   1688  CB  ILE   182     -25.180  37.820 -31.170  1.00  0.00
ATOM   1689  CG2 ILE   182     -24.090  38.900 -31.260  1.00  0.00
ATOM   1690  CG1 ILE   182     -24.900  36.590 -32.050  1.00  0.00
ATOM   1691  CD1 ILE   182     -25.000  36.900 -33.550  1.00  0.00
ATOM   1692  C   ILE   182     -26.470  36.470 -29.570  1.00  0.00
ATOM   1693  O   ILE   182     -26.490  35.400 -30.170  1.00  0.00
ATOM   1694  N   ARG   183     -27.460  36.850 -28.740  1.00  0.00
ATOM   1695  HN  ARG   183     -27.390  37.740 -28.260  1.00  0.00
ATOM   1696  CA  ARG   183     -28.600  36.020 -28.510  1.00  0.00
ATOM   1697  CB  ARG   183     -29.100  36.080 -27.060  1.00  0.00
ATOM   1698  CG  ARG   183     -28.070  35.510 -26.080  1.00  0.00
ATOM   1699  CD  ARG   183     -28.100  33.980 -26.000  1.00  0.00
ATOM   1700  NE  ARG   183     -26.920  33.540 -25.210  1.00  0.00
ATOM   1701  HE  ARG   183     -26.080  33.230 -25.690  1.00  0.00
ATOM   1702  CZ  ARG   183     -26.950  33.550 -23.850  1.00  0.00
ATOM   1703  NH1 ARG   183     -28.050  34.030 -23.190  1.00  0.00
ATOM   1704 HH11 ARG   183     -28.840  34.370 -23.720  1.00  0.00
ATOM   1705 HH12 ARG   183     -28.080  34.030 -22.180  1.00  0.00
ATOM   1706  NH2 ARG   183     -25.890  33.080 -23.130  1.00  0.00
ATOM   1707 HH21 ARG   183     -25.070  32.720 -23.620  1.00  0.00
ATOM   1708 HH22 ARG   183     -25.910  33.090 -22.120  1.00  0.00
ATOM   1709  C   ARG   183     -29.700  36.500 -29.410  1.00  0.00
ATOM   1710  O   ARG   183     -29.700  37.640 -29.870  1.00  0.00
ATOM   1711  N   ASP   184     -30.660  35.610 -29.690  1.00  0.00
ATOM   1712  HN  ASP   184     -30.620  34.700 -29.270  1.00  0.00
ATOM   1713  CA  ASP   184     -31.750  35.920 -30.570  1.00  0.00
ATOM   1714  CB  ASP   184     -32.700  34.730 -30.740  1.00  0.00
ATOM   1715  CG  ASP   184     -33.780  35.090 -31.750  1.00  0.00
ATOM   1716  OD1 ASP   184     -33.650  36.140 -32.430  1.00  0.00
ATOM   1717  OD2 ASP   184     -34.770  34.300 -31.860  1.00  0.00
ATOM   1718  C   ASP   184     -32.540  37.050 -29.960  1.00  0.00
ATOM   1719  O   ASP   184     -33.070  37.890 -30.680  1.00  0.00
ATOM   1720  N   GLY   185     -32.640  37.090 -28.620  1.00  0.00
ATOM   1721  HN  GLY   185     -32.140  36.430 -28.050  1.00  0.00
ATOM   1722  CA  GLY   185     -33.470  38.080 -27.990  1.00  0.00
ATOM   1723  C   GLY   185     -33.000  39.490 -28.260  1.00  0.00
ATOM   1724  O   GLY   185     -33.810  40.360 -28.550  1.00  0.00
ATOM   1725  N   ASP   186     -31.680  39.750 -28.140  1.00  0.00
ATOM   1726  HN  ASP   186     -31.050  39.010 -27.890  1.00  0.00
ATOM   1727  CA  ASP   186     -31.160  41.080 -28.350  1.00  0.00
ATOM   1728  CB  ASP   186     -31.070  41.920 -27.060  1.00  0.00
ATOM   1729  CG  ASP   186     -32.470  42.330 -26.620  1.00  0.00
ATOM   1730  OD1 ASP   186     -33.200  42.940 -27.460  1.00  0.00
ATOM   1731  OD2 ASP   186     -32.830  42.030 -25.450  1.00  0.00
ATOM   1732  C   ASP   186     -29.750  40.890 -28.810  1.00  0.00
ATOM   1733  O   ASP   186     -29.480  40.160 -29.760  1.00  0.00
ATOM   1734  N   LYS   187     -28.810  41.630 -28.180  1.00  0.00
ATOM   1735  HN  LYS   187     -29.080  42.340 -27.520  1.00  0.00
ATOM   1736  CA  LYS   187     -27.410  41.400 -28.430  1.00  0.00
ATOM   1737  CB  LYS   187     -26.930  41.860 -29.820  1.00  0.00
ATOM   1738  CG  LYS   187     -26.930  43.370 -30.070  1.00  0.00
ATOM   1739  CD  LYS   187     -25.710  44.100 -29.500  1.00  0.00
ATOM   1740  CE  LYS   187     -24.510  44.100 -30.450  1.00  0.00
ATOM   1741  NZ  LYS   187     -23.410  44.900 -29.870  1.00  0.00
ATOM   1742  HZ1 LYS   187     -23.720  45.860 -29.730  1.00  0.00
ATOM   1743  HZ2 LYS   187     -23.130  44.500 -28.980  1.00  0.00
ATOM   1744  HZ3 LYS   187     -22.620  44.890 -30.510  1.00  0.00
ATOM   1745  C   LYS   187     -26.630  42.110 -27.360  1.00  0.00
ATOM   1746  O   LYS   187     -26.880  43.290 -27.150  1.00  0.00
ATOM   1747  N   PHE   188     -25.710  41.430 -26.620  1.00  0.00
ATOM   1748  HN  PHE   188     -25.560  40.440 -26.780  1.00  0.00
ATOM   1749  CA  PHE   188     -24.940  42.110 -25.600  1.00  0.00
ATOM   1750  CB  PHE   188     -25.780  42.680 -24.440  1.00  0.00
ATOM   1751  CG  PHE   188     -26.350  41.570 -23.620  1.00  0.00
ATOM   1752  CD1 PHE   188     -27.460  40.890 -24.040  1.00  0.00
ATOM   1753  CD2 PHE   188     -25.770  41.240 -22.420  1.00  0.00
ATOM   1754  CE1 PHE   188     -27.990  39.870 -23.280  1.00  0.00
ATOM   1755  CE2 PHE   188     -26.290  40.220 -21.650  1.00  0.00
ATOM   1756  CZ  PHE   188     -27.400  39.530 -22.080  1.00  0.00
ATOM   1757  C   PHE   188     -23.890  41.200 -25.030  1.00  0.00
ATOM   1758  O   PHE   188     -23.660  40.090 -25.510  1.00  0.00
ATOM   1759  N   GLN   189     -23.180  41.690 -23.970  1.00  0.00
ATOM   1760  HN  GLN   189     -23.400  42.600 -23.620  1.00  0.00
ATOM   1761  CA  GLN   189     -22.130  40.930 -23.350  1.00  0.00
ATOM   1762  CB  GLN   189     -20.900  41.780 -22.960  1.00  0.00
ATOM   1763  CG  GLN   189     -20.130  42.340 -24.160  1.00  0.00
ATOM   1764  CD  GLN   189     -18.960  43.150 -23.630  1.00  0.00
ATOM   1765  OE1 GLN   189     -18.830  44.340 -23.910  1.00  0.00
ATOM   1766  NE2 GLN   189     -18.090  42.480 -22.830  1.00  0.00
ATOM   1767 HE22 GLN   189     -18.230  41.510 -22.620  1.00  0.00
ATOM   1768 HE21 GLN   189     -17.290  42.970 -22.440  1.00  0.00
ATOM   1769  C   GLN   189     -22.650  40.330 -22.080  1.00  0.00
ATOM   1770  O   GLN   189     -23.260  41.000 -21.250  1.00  0.00
ATOM   1771  N   ILE   190     -22.380  39.020 -21.880  1.00  0.00
ATOM   1772  HN  ILE   190     -21.840  38.530 -22.570  1.00  0.00
ATOM   1773  CA  ILE   190     -22.840  38.310 -20.720  1.00  0.00
ATOM   1774  CB  ILE   190     -23.700  37.120 -21.050  1.00  0.00
ATOM   1775  CG2 ILE   190     -24.940  37.610 -21.810  1.00  0.00
ATOM   1776  CG1 ILE   190     -22.880  36.080 -21.850  1.00  0.00
ATOM   1777  CD1 ILE   190     -23.580  34.730 -21.970  1.00  0.00
ATOM   1778  C   ILE   190     -21.610  37.780 -20.050  1.00  0.00
ATOM   1779  O   ILE   190     -20.510  37.940 -20.570  1.00  0.00
ATOM   1780  N   ASN   191     -21.760  37.180 -18.860  1.00  0.00
ATOM   1781  HN  ASN   191     -22.680  37.080 -18.450  1.00  0.00
ATOM   1782  CA  ASN   191     -20.610  36.670 -18.170  1.00  0.00
ATOM   1783  CB  ASN   191     -20.880  36.310 -16.690  1.00  0.00
ATOM   1784  CG  ASN   191     -21.060  37.610 -15.920  1.00  0.00
ATOM   1785  OD1 ASN   191     -20.300  38.560 -16.120  1.00  0.00
ATOM   1786  ND2 ASN   191     -22.080  37.670 -15.030  1.00  0.00
ATOM   1787 HD22 ASN   191     -22.680  36.870 -14.900  1.00  0.00
ATOM   1788 HD21 ASN   191     -22.250  38.510 -14.500  1.00  0.00
ATOM   1789  C   ASN   191     -20.120  35.450 -18.870  1.00  0.00
ATOM   1790  O   ASN   191     -20.880  34.680 -19.450  1.00  0.00
ATOM   1791  N   ALA   192     -18.790  35.240 -18.790  1.00  0.00
ATOM   1792  HN  ALA   192     -18.240  35.890 -18.250  1.00  0.00
ATOM   1793  CA  ALA   192     -18.090  34.150 -19.420  1.00  0.00
ATOM   1794  CB  ALA   192     -16.570  34.190 -19.160  1.00  0.00
ATOM   1795  C   ALA   192     -18.610  32.870 -18.870  1.00  0.00
ATOM   1796  O   ALA   192     -18.580  31.830 -19.530  1.00  0.00
ATOM   1797  N   ASP   193     -19.030  32.890 -17.590  1.00  0.00
ATOM   1798  HN  ASP   193     -18.980  33.750 -17.070  1.00  0.00
ATOM   1799  CA  ASP   193     -19.560  31.720 -16.950  1.00  0.00
ATOM   1800  CB  ASP   193     -19.870  31.960 -15.460  1.00  0.00
ATOM   1801  CG  ASP   193     -18.540  32.100 -14.720  1.00  0.00
ATOM   1802  OD1 ASP   193     -17.600  31.320 -15.040  1.00  0.00
ATOM   1803  OD2 ASP   193     -18.450  33.000 -13.850  1.00  0.00
ATOM   1804  C   ASP   193     -20.860  31.320 -17.600  1.00  0.00
ATOM   1805  O   ASP   193     -21.160  30.130 -17.720  1.00  0.00
ATOM   1806  N   GLN   194     -21.650  32.320 -18.010  1.00  0.00
ATOM   1807  HN  GLN   194     -21.300  33.260 -17.930  1.00  0.00
ATOM   1808  CA  GLN   194     -22.970  32.170 -18.570  1.00  0.00
ATOM   1809  CB  GLN   194     -23.800  33.470 -18.500  1.00  0.00
ATOM   1810  CG  GLN   194     -24.050  33.870 -17.040  1.00  0.00
ATOM   1811  CD  GLN   194     -25.050  35.020 -16.990  1.00  0.00
ATOM   1812  OE1 GLN   194     -25.550  35.480 -18.020  1.00  0.00
ATOM   1813  NE2 GLN   194     -25.350  35.490 -15.750  1.00  0.00
ATOM   1814 HE22 GLN   194     -24.910  35.070 -14.940  1.00  0.00
ATOM   1815 HE21 GLN   194     -26.000  36.250 -15.640  1.00  0.00
ATOM   1816  C   GLN   194     -23.020  31.610 -19.970  1.00  0.00
ATOM   1817  O   GLN   194     -24.070  31.170 -20.410  1.00  0.00
ATOM   1818  N   LEU   195     -21.930  31.690 -20.760  1.00  0.00
ATOM   1819  HN  LEU   195     -21.060  32.050 -20.390  1.00  0.00
ATOM   1820  CA  LEU   195     -22.000  31.250 -22.130  1.00  0.00
ATOM   1821  CB  LEU   195     -20.710  31.480 -22.940  1.00  0.00
ATOM   1822  CG  LEU   195     -20.350  32.960 -23.140  1.00  0.00
ATOM   1823  CD2 LEU   195     -19.270  33.130 -24.230  1.00  0.00
ATOM   1824  CD1 LEU   195     -19.960  33.640 -21.810  1.00  0.00
ATOM   1825  C   LEU   195     -22.290  29.780 -22.200  1.00  0.00
ATOM   1826  O   LEU   195     -21.880  29.020 -21.330  1.00  0.00
ATOM   1827  N   VAL   196     -23.030  29.370 -23.260  1.00  0.00
ATOM   1828  HN  VAL   196     -23.310  30.050 -23.950  1.00  0.00
ATOM   1829  CA  VAL   196     -23.430  28.000 -23.450  1.00  0.00
ATOM   1830  CB  VAL   196     -24.920  27.810 -23.570  1.00  0.00
ATOM   1831  CG1 VAL   196     -25.630  28.410 -22.360  1.00  0.00
ATOM   1832  CG2 VAL   196     -25.400  28.400 -24.900  1.00  0.00
ATOM   1833  C   VAL   196     -22.980  27.600 -24.810  1.00  0.00
ATOM   1834  O   VAL   196     -22.770  28.430 -25.690  1.00  0.00
ATOM   1835  N   VAL   197     -22.830  26.290 -25.030  1.00  0.00
ATOM   1836  HN  VAL   197     -22.970  25.600 -24.300  1.00  0.00
ATOM   1837  CA  VAL   197     -22.460  25.900 -26.350  1.00  0.00
ATOM   1838  CB  VAL   197     -22.010  24.480 -26.420  1.00  0.00
ATOM   1839  CG1 VAL   197     -21.910  24.060 -27.870  1.00  0.00
ATOM   1840  CG2 VAL   197     -20.680  24.430 -25.660  1.00  0.00
ATOM   1841  C   VAL   197     -23.650  26.130 -27.230  1.00  0.00
ATOM   1842  O   VAL   197     -24.790  25.960 -26.810  1.00  0.00
ATOM   1843  N   GLY   198     -23.390  26.600 -28.470  1.00  0.00
ATOM   1844  HN  GLY   198     -22.440  26.790 -28.740  1.00  0.00
ATOM   1845  CA  GLY   198     -24.450  26.810 -29.420  1.00  0.00
ATOM   1846  C   GLY   198     -24.650  28.280 -29.700  1.00  0.00
ATOM   1847  O   GLY   198     -24.900  28.640 -30.850  1.00  0.00
ATOM   1848  N   ASP   199     -24.550  29.180 -28.710  1.00  0.00
ATOM   1849  HN  ASP   199     -24.310  28.900 -27.770  1.00  0.00
ATOM   1850  CA  ASP   199     -24.810  30.560 -29.040  1.00  0.00
ATOM   1851  CB  ASP   199     -25.190  31.430 -27.830  1.00  0.00
ATOM   1852  CG  ASP   199     -24.060  31.400 -26.820  1.00  0.00
ATOM   1853  OD1 ASP   199     -23.030  30.730 -27.090  1.00  0.00
ATOM   1854  OD2 ASP   199     -24.220  32.040 -25.740  1.00  0.00
ATOM   1855  C   ASP   199     -23.620  31.140 -29.750  1.00  0.00
ATOM   1856  O   ASP   199     -22.500  30.640 -29.630  1.00  0.00
ATOM   1857  N   LEU   200     -23.840  32.220 -30.540  1.00  0.00
ATOM   1858  HN  LEU   200     -24.780  32.600 -30.600  1.00  0.00
ATOM   1859  CA  LEU   200     -22.790  32.830 -31.300  1.00  0.00
ATOM   1860  CB  LEU   200     -23.260  33.510 -32.590  1.00  0.00
ATOM   1861  CG  LEU   200     -23.820  32.520 -33.630  1.00  0.00
ATOM   1862  CD2 LEU   200     -22.900  31.310 -33.820  1.00  0.00
ATOM   1863  CD1 LEU   200     -24.120  33.240 -34.950  1.00  0.00
ATOM   1864  C   LEU   200     -22.080  33.870 -30.480  1.00  0.00
ATOM   1865  O   LEU   200     -22.700  34.640 -29.740  1.00  0.00
ATOM   1866  N   VAL   201     -20.750  33.930 -30.640  1.00  0.00
ATOM   1867  HN  VAL   201     -20.300  33.320 -31.310  1.00  0.00
ATOM   1868  CA  VAL   201     -19.940  34.840 -29.890  1.00  0.00
ATOM   1869  CB  VAL   201     -18.990  34.160 -28.950  1.00  0.00
ATOM   1870  CG1 VAL   201     -19.800  33.390 -27.900  1.00  0.00
ATOM   1871  CG2 VAL   201     -18.040  33.270 -29.780  1.00  0.00
ATOM   1872  C   VAL   201     -19.120  35.660 -30.820  1.00  0.00
ATOM   1873  O   VAL   201     -18.990  35.350 -32.010  1.00  0.00
ATOM   1874  N   GLU   202     -18.570  36.780 -30.300  1.00  0.00
ATOM   1875  HN  GLU   202     -18.770  37.030 -29.350  1.00  0.00
ATOM   1876  CA  GLU   202     -17.720  37.610 -31.090  1.00  0.00
ATOM   1877  CB  GLU   202     -18.320  38.970 -31.460  1.00  0.00
ATOM   1878  CG  GLU   202     -17.480  39.730 -32.500  1.00  0.00
ATOM   1879  CD  GLU   202     -18.140  41.070 -32.780  1.00  0.00
ATOM   1880  OE1 GLU   202     -18.370  41.820 -31.800  1.00  0.00
ATOM   1881  OE2 GLU   202     -18.410  41.360 -33.970  1.00  0.00
ATOM   1882  C   GLU   202     -16.500  37.880 -30.280  1.00  0.00
ATOM   1883  O   GLU   202     -16.550  37.890 -29.050  1.00  0.00
ATOM   1884  N   MET   203     -15.370  38.090 -30.960  1.00  0.00
ATOM   1885  HN  MET   203     -15.390  38.030 -31.970  1.00  0.00
ATOM   1886  CA  MET   203     -14.130  38.380 -30.310  1.00  0.00
ATOM   1887  CB  MET   203     -13.210  37.150 -30.200  1.00  0.00
ATOM   1888  CG  MET   203     -13.800  36.040 -29.320  1.00  0.00
ATOM   1889  SD  MET   203     -12.860  34.490 -29.330  1.00  0.00
ATOM   1890  CE  MET   203     -13.430  33.940 -30.970  1.00  0.00
ATOM   1891  C   MET   203     -13.440  39.380 -31.170  1.00  0.00
ATOM   1892  O   MET   203     -13.650  39.420 -32.380  1.00  0.00
ATOM   1893  N   LYS   204     -12.600  40.230 -30.540  1.00  0.00
ATOM   1894  HN  LYS   204     -12.510  40.150 -29.540  1.00  0.00
ATOM   1895  CA  LYS   204     -11.850  41.260 -31.200  1.00  0.00
ATOM   1896  CB  LYS   204     -12.420  42.670 -30.930  1.00  0.00
ATOM   1897  CG  LYS   204     -11.650  43.820 -31.610  1.00  0.00
ATOM   1898  CD  LYS   204     -12.370  45.170 -31.630  1.00  0.00
ATOM   1899  CE  LYS   204     -11.580  46.260 -32.360  1.00  0.00
ATOM   1900  NZ  LYS   204     -12.300  47.540 -32.320  1.00  0.00
ATOM   1901  HZ1 LYS   204     -13.200  47.440 -32.780  1.00  0.00
ATOM   1902  HZ2 LYS   204     -12.450  47.830 -31.360  1.00  0.00
ATOM   1903  HZ3 LYS   204     -11.760  48.250 -32.800  1.00  0.00
ATOM   1904  C   LYS   204     -10.490  41.200 -30.590  1.00  0.00
ATOM   1905  O   LYS   204     -10.260  40.420 -29.660  1.00  0.00
ATOM   1906  N   GLY   205      -9.550  42.020 -31.090  1.00  0.00
ATOM   1907  HN  GLY   205      -9.790  42.660 -31.830  1.00  0.00
ATOM   1908  CA  GLY   205      -8.220  42.010 -30.580  1.00  0.00
ATOM   1909  C   GLY   205      -8.250  42.350 -29.120  1.00  0.00
ATOM   1910  O   GLY   205      -9.050  43.160 -28.660  1.00  0.00
ATOM   1911  N   GLY   206      -7.360  41.690 -28.360  1.00  0.00
ATOM   1912  HN  GLY   206      -6.780  40.980 -28.790  1.00  0.00
ATOM   1913  CA  GLY   206      -7.200  41.950 -26.960  1.00  0.00
ATOM   1914  C   GLY   206      -8.130  41.080 -26.190  1.00  0.00
ATOM   1915  O   GLY   206      -7.930  40.850 -25.000  1.00  0.00
ATOM   1916  N   ASP   207      -9.180  40.560 -26.850  1.00  0.00
ATOM   1917  HN  ASP   207      -9.290  40.730 -27.840  1.00  0.00
ATOM   1918  CA  ASP   207     -10.140  39.760 -26.140  1.00  0.00
ATOM   1919  CB  ASP   207     -11.440  39.510 -26.930  1.00  0.00
ATOM   1920  CG  ASP   207     -12.200  40.820 -26.990  1.00  0.00
ATOM   1921  OD1 ASP   207     -12.190  41.560 -25.970  1.00  0.00
ATOM   1922  OD2 ASP   207     -12.810  41.110 -28.060  1.00  0.00
ATOM   1923  C   ASP   207      -9.540  38.430 -25.860  1.00  0.00
ATOM   1924  O   ASP   207      -8.630  37.970 -26.550  1.00  0.00
ATOM   1925  N   ARG   208     -10.030  37.780 -24.780  1.00  0.00
ATOM   1926  HN  ARG   208     -10.720  38.230 -24.200  1.00  0.00
ATOM   1927  CA  ARG   208      -9.580  36.460 -24.470  1.00  0.00
ATOM   1928  CB  ARG   208      -9.270  36.230 -22.980  1.00  0.00
ATOM   1929  CG  ARG   208      -7.980  36.900 -22.530  1.00  0.00
ATOM   1930  CD  ARG   208      -7.620  36.610 -21.070  1.00  0.00
ATOM   1931  NE  ARG   208      -6.270  37.200 -20.820  1.00  0.00
ATOM   1932  HE  ARG   208      -5.600  37.270 -21.570  1.00  0.00
ATOM   1933  CZ  ARG   208      -5.950  37.650 -19.570  1.00  0.00
ATOM   1934  NH1 ARG   208      -6.870  37.590 -18.570  1.00  0.00
ATOM   1935 HH11 ARG   208      -7.790  37.200 -18.750  1.00  0.00
ATOM   1936 HH12 ARG   208      -6.640  37.920 -17.650  1.00  0.00
ATOM   1937  NH2 ARG   208      -4.710  38.180 -19.340  1.00  0.00
ATOM   1938 HH21 ARG   208      -4.030  38.220 -20.090  1.00  0.00
ATOM   1939 HH22 ARG   208      -4.470  38.510 -18.420  1.00  0.00
ATOM   1940  C   ARG   208     -10.710  35.560 -24.810  1.00  0.00
ATOM   1941  O   ARG   208     -11.830  35.740 -24.330  1.00  0.00
ATOM   1942  N   VAL   209     -10.440  34.540 -25.650  1.00  0.00
ATOM   1943  HN  VAL   209      -9.490  34.380 -25.960  1.00  0.00
ATOM   1944  CA  VAL   209     -11.500  33.680 -26.090  1.00  0.00
ATOM   1945  CB  VAL   209     -11.010  32.630 -27.050  1.00  0.00
ATOM   1946  CG1 VAL   209     -12.190  31.750 -27.490  1.00  0.00
ATOM   1947  CG2 VAL   209     -10.250  33.310 -28.200  1.00  0.00
ATOM   1948  C   VAL   209     -12.080  32.990 -24.890  1.00  0.00
ATOM   1949  O   VAL   209     -11.390  32.290 -24.150  1.00  0.00
ATOM   1950  N   PRO   210     -13.350  33.210 -24.690  1.00  0.00
ATOM   1951  CA  PRO   210     -14.150  32.700 -23.600  1.00  0.00
ATOM   1952  CD  PRO   210     -14.120  34.060 -25.590  1.00  0.00
ATOM   1953  CB  PRO   210     -15.470  33.470 -23.660  1.00  0.00
ATOM   1954  CG  PRO   210     -15.580  33.880 -25.140  1.00  0.00
ATOM   1955  C   PRO   210     -14.400  31.220 -23.640  1.00  0.00
ATOM   1956  O   PRO   210     -14.740  30.660 -22.600  1.00  0.00
ATOM   1957  N   ALA   211     -14.300  30.570 -24.810  1.00  0.00
ATOM   1958  HN  ALA   211     -13.980  31.030 -25.640  1.00  0.00
ATOM   1959  CA  ALA   211     -14.660  29.180 -24.820  1.00  0.00
ATOM   1960  CB  ALA   211     -16.180  28.940 -24.780  1.00  0.00
ATOM   1961  C   ALA   211     -14.160  28.560 -26.090  1.00  0.00
ATOM   1962  O   ALA   211     -13.520  29.220 -26.900  1.00  0.00
ATOM   1963  N   ASP   212     -14.400  27.240 -26.260  1.00  0.00
ATOM   1964  HN  ASP   212     -14.860  26.700 -25.540  1.00  0.00
ATOM   1965  CA  ASP   212     -13.990  26.620 -27.490  1.00  0.00
ATOM   1966  CB  ASP   212     -13.990  25.090 -27.470  1.00  0.00
ATOM   1967  CG  ASP   212     -12.730  24.620 -26.740  1.00  0.00
ATOM   1968  OD1 ASP   212     -11.920  25.480 -26.320  1.00  0.00
ATOM   1969  OD2 ASP   212     -12.570  23.380 -26.590  1.00  0.00
ATOM   1970  C   ASP   212     -14.950  27.100 -28.540  1.00  0.00
ATOM   1971  O   ASP   212     -16.150  26.820 -28.460  1.00  0.00
ATOM   1972  N   ILE   213     -14.430  27.840 -29.540  1.00  0.00
ATOM   1973  HN  ILE   213     -13.440  27.970 -29.610  1.00  0.00
ATOM   1974  CA  ILE   213     -15.310  28.430 -30.510  1.00  0.00
ATOM   1975  CB  ILE   213     -15.300  29.930 -30.430  1.00  0.00
ATOM   1976  CG2 ILE   213     -16.120  30.480 -31.610  1.00  0.00
ATOM   1977  CG1 ILE   213     -15.800  30.390 -29.050  1.00  0.00
ATOM   1978  CD1 ILE   213     -15.470  31.850 -28.730  1.00  0.00
ATOM   1979  C   ILE   213     -14.920  28.060 -31.910  1.00  0.00
ATOM   1980  O   ILE   213     -13.780  28.250 -32.330  1.00  0.00
ATOM   1981  N   ARG   214     -15.890  27.510 -32.690  1.00  0.00
ATOM   1982  HN  ARG   214     -16.790  27.270 -32.300  1.00  0.00
ATOM   1983  CA  ARG   214     -15.610  27.280 -34.070  1.00  0.00
ATOM   1984  CB  ARG   214     -16.500  26.240 -34.760  1.00  0.00
ATOM   1985  CG  ARG   214     -15.920  25.790 -36.100  1.00  0.00
ATOM   1986  CD  ARG   214     -16.950  25.200 -37.050  1.00  0.00
ATOM   1987  NE  ARG   214     -16.230  24.510 -38.160  1.00  0.00
ATOM   1988  HE  ARG   214     -16.050  23.520 -38.090  1.00  0.00
ATOM   1989  CZ  ARG   214     -15.820  25.200 -39.270  1.00  0.00
ATOM   1990  NH1 ARG   214     -15.930  26.560 -39.320  1.00  0.00
ATOM   1991 HH11 ARG   214     -16.320  27.060 -38.540  1.00  0.00
ATOM   1992 HH12 ARG   214     -15.620  27.060 -40.140  1.00  0.00
ATOM   1993  NH2 ARG   214     -15.290  24.520 -40.320  1.00  0.00
ATOM   1994 HH21 ARG   214     -15.210  23.510 -40.290  1.00  0.00
ATOM   1995 HH22 ARG   214     -14.990  25.020 -41.150  1.00  0.00
ATOM   1996  C   ARG   214     -15.890  28.600 -34.720  1.00  0.00
ATOM   1997  O   ARG   214     -16.850  29.280 -34.350  1.00  0.00
ATOM   1998  N   ILE   215     -15.090  28.990 -35.730  1.00  0.00
ATOM   1999  HN  ILE   215     -14.370  28.380 -36.080  1.00  0.00
ATOM   2000  CA  ILE   215     -15.270  30.300 -36.300  1.00  0.00
ATOM   2001  CB  ILE   215     -13.970  30.910 -36.770  1.00  0.00
ATOM   2002  CG2 ILE   215     -14.290  32.260 -37.440  1.00  0.00
ATOM   2003  CG1 ILE   215     -12.980  31.030 -35.600  1.00  0.00
ATOM   2004  CD1 ILE   215     -11.560  31.350 -36.060  1.00  0.00
ATOM   2005  C   ILE   215     -16.170  30.220 -37.500  1.00  0.00
ATOM   2006  O   ILE   215     -15.950  29.430 -38.410  1.00  0.00
ATOM   2007  N   LEU   216     -17.290  30.980 -37.450  1.00  0.00
ATOM   2008  HN  LEU   216     -17.490  31.480 -36.590  1.00  0.00
ATOM   2009  CA  LEU   216     -18.200  31.100 -38.550  1.00  0.00
ATOM   2010  CB  LEU   216     -19.560  31.650 -38.090  1.00  0.00
ATOM   2011  CG  LEU   216     -20.270  30.740 -37.070  1.00  0.00
ATOM   2012  CD2 LEU   216     -20.410  29.310 -37.600  1.00  0.00
ATOM   2013  CD1 LEU   216     -21.620  31.350 -36.650  1.00  0.00
ATOM   2014  C   LEU   216     -17.680  32.050 -39.590  1.00  0.00
ATOM   2015  O   LEU   216     -17.540  31.700 -40.760  1.00  0.00
ATOM   2016  N   GLN   217     -17.350  33.290 -39.170  1.00  0.00
ATOM   2017  HN  GLN   217     -17.380  33.510 -38.180  1.00  0.00
ATOM   2018  CA  GLN   217     -16.970  34.300 -40.110  1.00  0.00
ATOM   2019  CB  GLN   217     -18.090  35.300 -40.430  1.00  0.00
ATOM   2020  CG  GLN   217     -18.500  36.130 -39.210  1.00  0.00
ATOM   2021  CD  GLN   217     -19.590  37.100 -39.640  1.00  0.00
ATOM   2022  OE1 GLN   217     -20.500  37.410 -38.870  1.00  0.00
ATOM   2023  NE2 GLN   217     -19.500  37.600 -40.900  1.00  0.00
ATOM   2024 HE22 GLN   217     -18.730  37.320 -41.490  1.00  0.00
ATOM   2025 HE21 GLN   217     -20.190  38.250 -41.240  1.00  0.00
ATOM   2026  C   GLN   217     -15.890  35.110 -39.490  1.00  0.00
ATOM   2027  O   GLN   217     -15.970  35.480 -38.320  1.00  0.00
ATOM   2028  N   ALA   218     -14.840  35.430 -40.270  1.00  0.00
ATOM   2029  HN  ALA   218     -14.810  35.130 -41.240  1.00  0.00
ATOM   2030  CA  ALA   218     -13.780  36.200 -39.710  1.00  0.00
ATOM   2031  CB  ALA   218     -12.480  35.400 -39.510  1.00  0.00
ATOM   2032  C   ALA   218     -13.470  37.310 -40.640  1.00  0.00
ATOM   2033  O   ALA   218     -13.550  37.180 -41.860  1.00  0.00
ATOM   2034  N   GLN   219     -13.140  38.480 -40.070  1.00  0.00
ATOM   2035  HN  GLN   219     -13.170  38.600 -39.070  1.00  0.00
ATOM   2036  CA  GLN   219     -12.750  39.530 -40.940  1.00  0.00
ATOM   2037  CB  GLN   219     -12.540  40.880 -40.230  1.00  0.00
ATOM   2038  CG  GLN   219     -11.380  40.880 -39.240  1.00  0.00
ATOM   2039  CD  GLN   219     -11.240  42.280 -38.670  1.00  0.00
ATOM   2040  OE1 GLN   219     -10.170  42.650 -38.170  1.00  0.00
ATOM   2041  NE2 GLN   219     -12.330  43.090 -38.750  1.00  0.00
ATOM   2042 HE22 GLN   219     -13.180  42.750 -39.170  1.00  0.00
ATOM   2043 HE21 GLN   219     -12.290  44.030 -38.390  1.00  0.00
ATOM   2044  C   GLN   219     -11.410  39.150 -41.550  1.00  0.00
ATOM   2045  O   GLN   219     -11.210  39.280 -42.760  1.00  0.00
ATOM   2046  N   GLY   220     -10.470  38.650 -40.710  1.00  0.00
ATOM   2047  HN  GLY   220     -10.750  38.560 -39.750  1.00  0.00
ATOM   2048  CA  GLY   220      -9.110  38.210 -40.990  1.00  0.00
ATOM   2049  C   GLY   220      -8.510  38.140 -39.610  1.00  0.00
ATOM   2050  O   GLY   220      -8.390  39.170 -38.950  1.00  0.00
ATOM   2051  N   ARG   221      -8.080  36.950 -39.140  1.00  0.00
ATOM   2052  HN  ARG   221      -7.950  36.140 -39.720  1.00  0.00
ATOM   2053  CA  ARG   221      -7.800  36.950 -37.720  1.00  0.00
ATOM   2054  CB  ARG   221      -8.900  36.250 -36.910  1.00  0.00
ATOM   2055  CG  ARG   221      -8.720  36.320 -35.390  1.00  0.00
ATOM   2056  CD  ARG   221      -9.890  35.730 -34.600  1.00  0.00
ATOM   2057  NE  ARG   221      -9.590  34.300 -34.320  1.00  0.00
ATOM   2058  HE  ARG   221      -9.110  33.740 -35.010  1.00  0.00
ATOM   2059  CZ  ARG   221      -9.980  33.740 -33.140  1.00  0.00
ATOM   2060  NH1 ARG   221     -10.640  34.490 -32.200  1.00  0.00
ATOM   2061 HH11 ARG   221     -10.850  35.460 -32.390  1.00  0.00
ATOM   2062 HH12 ARG   221     -10.920  34.070 -31.330  1.00  0.00
ATOM   2063  NH2 ARG   221      -9.690  32.430 -32.880  1.00  0.00
ATOM   2064 HH21 ARG   221      -9.200  31.870 -33.560  1.00  0.00
ATOM   2065 HH22 ARG   221      -9.980  32.020 -32.000  1.00  0.00
ATOM   2066  C   ARG   221      -6.500  36.310 -37.350  1.00  0.00
ATOM   2067  O   ARG   221      -6.020  35.390 -38.020  1.00  0.00
ATOM   2068  N   LYS   222      -5.910  36.810 -36.240  1.00  0.00
ATOM   2069  HN  LYS   222      -6.360  37.590 -35.780  1.00  0.00
ATOM   2070  CA  LYS   222      -4.690  36.300 -35.670  1.00  0.00
ATOM   2071  CB  LYS   222      -3.540  37.320 -35.590  1.00  0.00
ATOM   2072  CG  LYS   222      -2.990  37.840 -36.920  1.00  0.00
ATOM   2073  CD  LYS   222      -1.980  38.970 -36.690  1.00  0.00
ATOM   2074  CE  LYS   222      -1.280  39.480 -37.950  1.00  0.00
ATOM   2075  NZ  LYS   222      -0.320  40.550 -37.590  1.00  0.00
ATOM   2076  HZ1 LYS   222      -0.820  41.320 -37.140  1.00  0.00
ATOM   2077  HZ2 LYS   222       0.370  40.180 -36.950  1.00  0.00
ATOM   2078  HZ3 LYS   222       0.140  40.890 -38.430  1.00  0.00
ATOM   2079  C   LYS   222      -4.970  35.960 -34.240  1.00  0.00
ATOM   2080  O   LYS   222      -5.830  36.570 -33.610  1.00  0.00
ATOM   2081  N   VAL   223      -4.240  34.970 -33.690  1.00  0.00
ATOM   2082  HN  VAL   223      -3.540  34.480 -34.230  1.00  0.00
ATOM   2083  CA  VAL   223      -4.470  34.620 -32.320  1.00  0.00
ATOM   2084  CB  VAL   223      -5.370  33.430 -32.150  1.00  0.00
ATOM   2085  CG1 VAL   223      -6.780  33.790 -32.640  1.00  0.00
ATOM   2086  CG2 VAL   223      -4.720  32.260 -32.910  1.00  0.00
ATOM   2087  C   VAL   223      -3.180  34.260 -31.660  1.00  0.00
ATOM   2088  O   VAL   223      -2.250  33.750 -32.300  1.00  0.00
ATOM   2089  N   ASP   224      -3.100  34.510 -30.340  1.00  0.00
ATOM   2090  HN  ASP   224      -3.890  34.940 -29.870  1.00  0.00
ATOM   2091  CA  ASP   224      -1.930  34.170 -29.600  1.00  0.00
ATOM   2092  CB  ASP   224      -1.560  35.230 -28.550  1.00  0.00
ATOM   2093  CG  ASP   224      -0.160  34.940 -28.050  1.00  0.00
ATOM   2094  OD1 ASP   224       0.630  34.360 -28.840  1.00  0.00
ATOM   2095  OD2 ASP   224       0.130  35.300 -26.880  1.00  0.00
ATOM   2096  C   ASP   224      -2.260  32.910 -28.860  1.00  0.00
ATOM   2097  O   ASP   224      -2.810  32.950 -27.760  1.00  0.00
ATOM   2098  N   ASN   225      -1.940  31.740 -29.450  1.00  0.00
ATOM   2099  HN  ASN   225      -1.490  31.730 -30.360  1.00  0.00
ATOM   2100  CA  ASN   225      -2.240  30.520 -28.780  1.00  0.00
ATOM   2101  CB  ASN   225      -2.470  29.350 -29.750  1.00  0.00
ATOM   2102  CG  ASN   225      -3.660  29.670 -30.640  1.00  0.00
ATOM   2103  OD1 ASN   225      -4.470  30.540 -30.340  1.00  0.00
ATOM   2104  ND2 ASN   225      -3.760  28.940 -31.790  1.00  0.00
ATOM   2105 HD22 ASN   225      -3.070  28.240 -32.000  1.00  0.00
ATOM   2106 HD21 ASN   225      -4.530  29.110 -32.420  1.00  0.00
ATOM   2107  C   ASN   225      -1.040  30.180 -27.960  1.00  0.00
ATOM   2108  O   ASN   225      -0.540  29.060 -28.020  1.00  0.00
ATOM   2109  N   SER   226      -0.550  31.150 -27.170  1.00  0.00
ATOM   2110  HN  SER   226      -1.040  32.040 -27.130  1.00  0.00
ATOM   2111  CA  SER   226       0.620  30.980 -26.360  1.00  0.00
ATOM   2112  CB  SER   226       1.130  32.300 -25.760  1.00  0.00
ATOM   2113  OG  SER   226       1.620  33.150 -26.780  1.00  0.00
ATOM   2114  HG  SER   226       1.930  33.970 -26.390  1.00  0.00
ATOM   2115  C   SER   226       0.380  30.060 -25.210  1.00  0.00
ATOM   2116  O   SER   226       1.180  29.160 -24.960  1.00  0.00
ATOM   2117  N   SER   227      -0.750  30.230 -24.500  1.00  0.00
ATOM   2118  HN  SER   227      -1.440  30.890 -24.820  1.00  0.00
ATOM   2119  CA  SER   227      -0.970  29.480 -23.300  1.00  0.00
ATOM   2120  CB  SER   227      -2.350  29.750 -22.670  1.00  0.00
ATOM   2121  OG  SER   227      -2.500  28.980 -21.490  1.00  0.00
ATOM   2122  HG  SER   227      -3.360  29.150 -21.110  1.00  0.00
ATOM   2123  C   SER   227      -0.900  28.020 -23.620  1.00  0.00
ATOM   2124  O   SER   227      -0.500  27.220 -22.780  1.00  0.00
ATOM   2125  N   LEU   228      -1.330  27.630 -24.830  1.00  0.00
ATOM   2126  HN  LEU   228      -1.700  28.290 -25.500  1.00  0.00
ATOM   2127  CA  LEU   228      -1.240  26.230 -25.130  1.00  0.00
ATOM   2128  CB  LEU   228      -1.950  25.880 -26.450  1.00  0.00
ATOM   2129  CG  LEU   228      -3.460  26.180 -26.440  1.00  0.00
ATOM   2130  CD2 LEU   228      -4.150  25.570 -25.220  1.00  0.00
ATOM   2131  CD1 LEU   228      -4.100  25.780 -27.780  1.00  0.00
ATOM   2132  C   LEU   228       0.190  25.800 -25.280  1.00  0.00
ATOM   2133  O   LEU   228       0.670  24.990 -24.490  1.00  0.00
ATOM   2134  N   THR   229       0.880  26.280 -26.340  1.00  0.00
ATOM   2135  HN  THR   229       0.410  26.920 -26.960  1.00  0.00
ATOM   2136  CA  THR   229       2.250  25.920 -26.620  1.00  0.00
ATOM   2137  CB  THR   229       2.510  25.880 -28.100  1.00  0.00
ATOM   2138  OG1 THR   229       2.330  27.170 -28.670  1.00  0.00
ATOM   2139  HG1 THR   229       2.500  27.130 -29.610  1.00  0.00
ATOM   2140  CG2 THR   229       1.530  24.880 -28.730  1.00  0.00
ATOM   2141  C   THR   229       3.310  26.770 -25.980  1.00  0.00
ATOM   2142  O   THR   229       4.170  26.250 -25.260  1.00  0.00
ATOM   2143  N   GLY   230       3.240  28.100 -26.170  1.00  0.00
ATOM   2144  HN  GLY   230       2.440  28.480 -26.650  1.00  0.00
ATOM   2145  CA  GLY   230       4.260  29.010 -25.690  1.00  0.00
ATOM   2146  C   GLY   230       4.850  29.770 -26.840  1.00  0.00
ATOM   2147  O   GLY   230       5.390  30.860 -26.640  1.00  0.00
ATOM   2148  N   GLU   231       4.800  29.250 -28.080  1.00  0.00
ATOM   2149  HN  GLU   231       4.400  28.340 -28.260  1.00  0.00
ATOM   2150  CA  GLU   231       5.350  30.050 -29.140  1.00  0.00
ATOM   2151  CB  GLU   231       5.420  29.320 -30.500  1.00  0.00
ATOM   2152  CG  GLU   231       6.540  28.280 -30.570  1.00  0.00
ATOM   2153  CD  GLU   231       6.130  27.030 -29.810  1.00  0.00
ATOM   2154  OE1 GLU   231       4.950  26.970 -29.370  1.00  0.00
ATOM   2155  OE2 GLU   231       6.980  26.120 -29.660  1.00  0.00
ATOM   2156  C   GLU   231       4.470  31.250 -29.270  1.00  0.00
ATOM   2157  O   GLU   231       3.300  31.150 -29.640  1.00  0.00
ATOM   2158  N   SER   232       5.040  32.440 -29.010  1.00  0.00
ATOM   2159  HN  SER   232       6.030  32.490 -28.820  1.00  0.00
ATOM   2160  CA  SER   232       4.280  33.660 -29.010  1.00  0.00
ATOM   2161  CB  SER   232       5.090  34.880 -28.550  1.00  0.00
ATOM   2162  OG  SER   232       5.430  34.760 -27.170  1.00  0.00
ATOM   2163  HG  SER   232       5.930  35.530 -26.900  1.00  0.00
ATOM   2164  C   SER   232       3.780  33.950 -30.380  1.00  0.00
ATOM   2165  O   SER   232       2.820  34.700 -30.550  1.00  0.00
ATOM   2166  N   GLU   233       4.420  33.360 -31.410  1.00  0.00
ATOM   2167  HN  GLU   233       5.170  32.710 -31.210  1.00  0.00
ATOM   2168  CA  GLU   233       4.060  33.630 -32.770  1.00  0.00
ATOM   2169  CB  GLU   233       4.810  32.720 -33.770  1.00  0.00
ATOM   2170  CG  GLU   233       4.630  33.120 -35.230  1.00  0.00
ATOM   2171  CD  GLU   233       5.530  34.320 -35.500  1.00  0.00
ATOM   2172  OE1 GLU   233       5.840  35.060 -34.530  1.00  0.00
ATOM   2173  OE2 GLU   233       5.930  34.510 -36.680  1.00  0.00
ATOM   2174  C   GLU   233       2.600  33.390 -32.930  1.00  0.00
ATOM   2175  O   GLU   233       2.080  32.300 -32.700  1.00  0.00
ATOM   2176  N   PRO   234       1.930  34.430 -33.360  1.00  0.00
ATOM   2177  CA  PRO   234       0.500  34.420 -33.560  1.00  0.00
ATOM   2178  CD  PRO   234       2.470  35.770 -33.250  1.00  0.00
ATOM   2179  CB  PRO   234       0.100  35.880 -33.730  1.00  0.00
ATOM   2180  CG  PRO   234       1.420  36.630 -33.960  1.00  0.00
ATOM   2181  C   PRO   234       0.190  33.580 -34.750  1.00  0.00
ATOM   2182  O   PRO   234       1.060  33.400 -35.590  1.00  0.00
ATOM   2183  N   GLN   235      -1.040  33.030 -34.820  1.00  0.00
ATOM   2184  HN  GLN   235      -1.710  33.200 -34.090  1.00  0.00
ATOM   2185  CA  GLN   235      -1.390  32.200 -35.940  1.00  0.00
ATOM   2186  CB  GLN   235      -1.690  30.740 -35.570  1.00  0.00
ATOM   2187  CG  GLN   235      -0.450  29.980 -35.070  1.00  0.00
ATOM   2188  CD  GLN   235      -0.850  28.550 -34.750  1.00  0.00
ATOM   2189  OE1 GLN   235      -1.780  27.990 -35.340  1.00  0.00
ATOM   2190  NE2 GLN   235      -0.130  27.920 -33.780  1.00  0.00
ATOM   2191 HE22 GLN   235       0.620  28.410 -33.320  1.00  0.00
ATOM   2192 HE21 GLN   235      -0.350  26.970 -33.520  1.00  0.00
ATOM   2193  C   GLN   235      -2.600  32.780 -36.600  1.00  0.00
ATOM   2194  O   GLN   235      -3.330  33.590 -36.030  1.00  0.00
ATOM   2195  N   THR   236      -2.840  32.380 -37.870  1.00  0.00
ATOM   2196  HN  THR   236      -2.220  31.700 -38.300  1.00  0.00
ATOM   2197  CA  THR   236      -3.950  32.890 -38.620  1.00  0.00
ATOM   2198  CB  THR   236      -3.570  33.310 -40.010  1.00  0.00
ATOM   2199  OG1 THR   236      -4.660  33.960 -40.650  1.00  0.00
ATOM   2200  HG1 THR   236      -4.400  34.220 -41.530  1.00  0.00
ATOM   2201  CG2 THR   236      -3.150  32.060 -40.810  1.00  0.00
ATOM   2202  C   THR   236      -5.020  31.850 -38.720  1.00  0.00
ATOM   2203  O   THR   236      -4.770  30.690 -39.050  1.00  0.00
ATOM   2204  N   ARG   237      -6.270  32.250 -38.420  1.00  0.00
ATOM   2205  HN  ARG   237      -6.420  33.220 -38.160  1.00  0.00
ATOM   2206  CA  ARG   237      -7.400  31.360 -38.440  1.00  0.00
ATOM   2207  CB  ARG   237      -8.480  31.650 -37.380  1.00  0.00
ATOM   2208  CG  ARG   237      -8.210  31.060 -36.000  1.00  0.00
ATOM   2209  CD  ARG   237      -7.130  31.760 -35.180  1.00  0.00
ATOM   2210  NE  ARG   237      -7.200  31.140 -33.820  1.00  0.00
ATOM   2211  HE  ARG   237      -7.720  31.590 -33.090  1.00  0.00
ATOM   2212  CZ  ARG   237      -6.540  29.970 -33.570  1.00  0.00
ATOM   2213  NH1 ARG   237      -5.820  29.370 -34.560  1.00  0.00
ATOM   2214 HH11 ARG   237      -5.770  29.780 -35.480  1.00  0.00
ATOM   2215 HH12 ARG   237      -5.330  28.500 -34.370  1.00  0.00
ATOM   2216  NH2 ARG   237      -6.600  29.410 -32.330  1.00  0.00
ATOM   2217 HH21 ARG   237      -7.130  29.860 -31.600  1.00  0.00
ATOM   2218 HH22 ARG   237      -6.110  28.550 -32.140  1.00  0.00
ATOM   2219  C   ARG   237      -8.110  31.440 -39.760  1.00  0.00
ATOM   2220  O   ARG   237      -7.910  32.360 -40.540  1.00  0.00
ATOM   2221  N   SER   238      -8.970  30.430 -40.030  1.00  0.00
ATOM   2222  HN  SER   238      -9.070  29.670 -39.380  1.00  0.00
ATOM   2223  CA  SER   238      -9.730  30.420 -41.260  1.00  0.00
ATOM   2224  CB  SER   238      -9.090  29.580 -42.370  1.00  0.00
ATOM   2225  OG  SER   238      -7.830  30.120 -42.740  1.00  0.00
ATOM   2226  HG  SER   238      -7.450  29.580 -43.440  1.00  0.00
ATOM   2227  C   SER   238     -11.090  29.810 -40.980  1.00  0.00
ATOM   2228  O   SER   238     -11.340  29.260 -39.910  1.00  0.00
ATOM   2229  N   PRO   239     -12.000  30.060 -41.890  1.00  0.00
ATOM   2230  CA  PRO   239     -13.310  29.440 -41.820  1.00  0.00
ATOM   2231  CD  PRO   239     -12.070  31.390 -42.450  1.00  0.00
ATOM   2232  CB  PRO   239     -14.260  30.370 -42.580  1.00  0.00
ATOM   2233  CG  PRO   239     -13.560  31.740 -42.530  1.00  0.00
ATOM   2234  C   PRO   239     -13.410  28.030 -42.350  1.00  0.00
ATOM   2235  O   PRO   239     -14.300  27.300 -41.920  1.00  0.00
ATOM   2236  N   GLU   240     -12.500  27.630 -43.270  1.00  0.00
ATOM   2237  HN  GLU   240     -11.730  28.230 -43.490  1.00  0.00
ATOM   2238  CA  GLU   240     -12.600  26.360 -43.940  1.00  0.00
ATOM   2239  CB  GLU   240     -11.520  26.170 -45.030  1.00  0.00
ATOM   2240  CG  GLU   240     -11.690  24.910 -45.880  1.00  0.00
ATOM   2241  CD  GLU   240     -10.700  25.000 -47.030  1.00  0.00
ATOM   2242  OE1 GLU   240     -10.830  25.930 -47.870  1.00  0.00
ATOM   2243  OE2 GLU   240      -9.790  24.130 -47.100  1.00  0.00
ATOM   2244  C   GLU   240     -12.500  25.250 -42.940  1.00  0.00
ATOM   2245  O   GLU   240     -11.920  25.420 -41.870  1.00  0.00
ATOM   2246  N   CYS   241     -13.110  24.080 -43.260  1.00  0.00
ATOM   2247  HN  CYS   241     -13.550  24.000 -44.160  1.00  0.00
ATOM   2248  CA  CYS   241     -13.160  22.960 -42.360  1.00  0.00
ATOM   2249  CB  CYS   241     -14.270  21.950 -42.720  1.00  0.00
ATOM   2250  SG  CYS   241     -14.040  21.210 -44.360  1.00  0.00
ATOM   2251  C   CYS   241     -11.860  22.210 -42.370  1.00  0.00
ATOM   2252  O   CYS   241     -11.090  22.280 -43.330  1.00  0.00
ATOM   2253  N   THR   242     -11.580  21.470 -41.270  1.00  0.00
ATOM   2254  HN  THR   242     -12.250  21.440 -40.510  1.00  0.00
ATOM   2255  CA  THR   242     -10.360  20.720 -41.170  1.00  0.00
ATOM   2256  CB  THR   242      -9.410  21.280 -40.150  1.00  0.00
ATOM   2257  OG1 THR   242      -9.990  21.220 -38.860  1.00  0.00
ATOM   2258  HG1 THR   242      -9.370  21.580 -38.210  1.00  0.00
ATOM   2259  CG2 THR   242      -9.070  22.730 -40.520  1.00  0.00
ATOM   2260  C   THR   242     -10.660  19.320 -40.750  1.00  0.00
ATOM   2261  O   THR   242     -11.640  19.040 -40.060  1.00  0.00
ATOM   2262  N   HIS   243      -9.820  18.380 -41.220  1.00  0.00
ATOM   2263  HN  HIS   243      -9.060  18.680 -41.820  1.00  0.00
ATOM   2264  CA  HIS   243      -9.930  16.990 -40.920  1.00  0.00
ATOM   2265  ND1 HIS   243      -9.400  17.140 -44.150  1.00  0.00
ATOM   2266  CG  HIS   243      -9.560  16.100 -43.260  1.00  0.00
ATOM   2267  CB  HIS   243      -9.070  16.110 -41.840  1.00  0.00
ATOM   2268  NE2 HIS   243     -10.480  15.530 -45.240  1.00  0.00
ATOM   2269  HE2 HIS   243     -10.950  15.020 -45.970  1.00  0.00
ATOM   2270  CD2 HIS   243     -10.220  15.120 -43.950  1.00  0.00
ATOM   2271  CE1 HIS   243      -9.970  16.750 -45.320  1.00  0.00
ATOM   2272  C   HIS   243      -9.540  16.670 -39.490  1.00  0.00
ATOM   2273  O   HIS   243     -10.230  15.880 -38.840  1.00  0.00
ATOM   2274  N   GLU   244      -8.450  17.270 -38.950  1.00  0.00
ATOM   2275  HN  GLU   244      -8.010  18.040 -39.430  1.00  0.00
ATOM   2276  CA  GLU   244      -7.940  16.790 -37.690  1.00  0.00
ATOM   2277  CB  GLU   244      -6.490  16.280 -37.750  1.00  0.00
ATOM   2278  CG  GLU   244      -6.380  14.850 -38.260  1.00  0.00
ATOM   2279  CD  GLU   244      -6.910  13.930 -37.160  1.00  0.00
ATOM   2280  OE1 GLU   244      -7.670  14.440 -36.290  1.00  0.00
ATOM   2281  OE2 GLU   244      -6.560  12.720 -37.170  1.00  0.00
ATOM   2282  C   GLU   244      -8.010  17.780 -36.550  1.00  0.00
ATOM   2283  O   GLU   244      -8.770  18.750 -36.560  1.00  0.00
ATOM   2284  N   SER   245      -7.170  17.480 -35.530  1.00  0.00
ATOM   2285  HN  SER   245      -6.520  16.740 -35.770  1.00  0.00
ATOM   2286  CA  SER   245      -6.990  17.970 -34.180  1.00  0.00
ATOM   2287  CB  SER   245      -5.920  17.120 -33.460  1.00  0.00
ATOM   2288  OG  SER   245      -6.350  15.770 -33.380  1.00  0.00
ATOM   2289  HG  SER   245      -5.680  15.250 -32.930  1.00  0.00
ATOM   2290  C   SER   245      -6.590  19.440 -34.070  1.00  0.00
ATOM   2291  O   SER   245      -6.540  20.140 -35.080  1.00  0.00
ATOM   2292  N   PRO   246      -6.330  19.910 -32.840  1.00  0.00
ATOM   2293  CA  PRO   246      -6.040  21.300 -32.560  1.00  0.00
ATOM   2294  CD  PRO   246      -7.000  19.300 -31.690  1.00  0.00
ATOM   2295  CB  PRO   246      -6.060  21.440 -31.030  1.00  0.00
ATOM   2296  CG  PRO   246      -7.080  20.380 -30.600  1.00  0.00
ATOM   2297  C   PRO   246      -4.920  22.070 -33.200  1.00  0.00
ATOM   2298  O   PRO   246      -5.170  23.210 -33.600  1.00  0.00
ATOM   2299  N   LEU   247      -3.700  21.530 -33.340  1.00  0.00
ATOM   2300  HN  LEU   247      -3.500  20.580 -33.040  1.00  0.00
ATOM   2301  CA  LEU   247      -2.670  22.350 -33.930  1.00  0.00
ATOM   2302  CB  LEU   247      -1.300  21.650 -34.010  1.00  0.00
ATOM   2303  CG  LEU   247      -0.200  22.520 -34.640  1.00  0.00
ATOM   2304  CD2 LEU   247       1.050  21.680 -34.970  1.00  0.00
ATOM   2305  CD1 LEU   247       0.120  23.730 -33.750  1.00  0.00
ATOM   2306  C   LEU   247      -3.120  22.630 -35.330  1.00  0.00
ATOM   2307  O   LEU   247      -3.010  23.750 -35.830  1.00  0.00
ATOM   2308  N   GLU   248      -3.660  21.580 -35.970  1.00  0.00
ATOM   2309  HN  GLU   248      -3.710  20.700 -35.470  1.00  0.00
ATOM   2310  CA  GLU   248      -4.160  21.630 -37.300  1.00  0.00
ATOM   2311  CB  GLU   248      -4.500  20.240 -37.860  1.00  0.00
ATOM   2312  CG  GLU   248      -4.730  20.210 -39.370  1.00  0.00
ATOM   2313  CD  GLU   248      -3.370  20.340 -40.040  1.00  0.00
ATOM   2314  OE1 GLU   248      -2.630  19.320 -40.080  1.00  0.00
ATOM   2315  OE2 GLU   248      -3.050  21.460 -40.530  1.00  0.00
ATOM   2316  C   GLU   248      -5.400  22.470 -37.340  1.00  0.00
ATOM   2317  O   GLU   248      -5.700  23.050 -38.380  1.00  0.00
ATOM   2318  N   THR   249      -6.170  22.530 -36.230  1.00  0.00
ATOM   2319  HN  THR   249      -5.860  22.090 -35.380  1.00  0.00
ATOM   2320  CA  THR   249      -7.430  23.230 -36.270  1.00  0.00
ATOM   2321  CB  THR   249      -8.290  23.060 -35.050  1.00  0.00
ATOM   2322  OG1 THR   249      -8.580  21.690 -34.830  1.00  0.00
ATOM   2323  HG1 THR   249      -9.120  21.610 -34.050  1.00  0.00
ATOM   2324  CG2 THR   249      -9.600  23.820 -35.310  1.00  0.00
ATOM   2325  C   THR   249      -7.230  24.700 -36.460  1.00  0.00
ATOM   2326  O   THR   249      -7.170  25.470 -35.500  1.00  0.00
ATOM   2327  N   ARG   250      -7.180  25.110 -37.740  1.00  0.00
ATOM   2328  HN  ARG   250      -7.280  24.390 -38.450  1.00  0.00
ATOM   2329  CA  ARG   250      -7.010  26.450 -38.210  1.00  0.00
ATOM   2330  CB  ARG   250      -6.790  26.530 -39.730  1.00  0.00
ATOM   2331  CG  ARG   250      -5.530  25.840 -40.210  1.00  0.00
ATOM   2332  CD  ARG   250      -5.330  25.930 -41.730  1.00  0.00
ATOM   2333  NE  ARG   250      -6.490  25.250 -42.370  1.00  0.00
ATOM   2334  HE  ARG   250      -7.330  25.780 -42.580  1.00  0.00
ATOM   2335  CZ  ARG   250      -6.420  23.930 -42.680  1.00  0.00
ATOM   2336  NH1 ARG   250      -5.280  23.220 -42.410  1.00  0.00
ATOM   2337 HH11 ARG   250      -4.490  23.680 -41.990  1.00  0.00
ATOM   2338 HH12 ARG   250      -5.240  22.230 -42.640  1.00  0.00
ATOM   2339  NH2 ARG   250      -7.490  23.300 -43.250  1.00  0.00
ATOM   2340 HH21 ARG   250      -8.340  23.820 -43.440  1.00  0.00
ATOM   2341 HH22 ARG   250      -7.440  22.320 -43.470  1.00  0.00
ATOM   2342  C   ARG   250      -8.230  27.260 -37.930  1.00  0.00
ATOM   2343  O   ARG   250      -8.150  28.490 -37.860  1.00  0.00
ATOM   2344  N   ASN   251      -9.410  26.620 -37.830  1.00  0.00
ATOM   2345  HN  ASN   251      -9.430  25.610 -37.860  1.00  0.00
ATOM   2346  CA  ASN   251     -10.620  27.370 -37.700  1.00  0.00
ATOM   2347  CB  ASN   251     -11.720  26.860 -38.660  1.00  0.00
ATOM   2348  CG  ASN   251     -12.060  25.390 -38.390  1.00  0.00
ATOM   2349  OD1 ASN   251     -11.790  24.810 -37.340  1.00  0.00
ATOM   2350  ND2 ASN   251     -12.670  24.730 -39.410  1.00  0.00
ATOM   2351 HD22 ASN   251     -12.870  25.210 -40.280  1.00  0.00
ATOM   2352 HD21 ASN   251     -12.910  23.750 -39.310  1.00  0.00
ATOM   2353  C   ASN   251     -11.210  27.270 -36.320  1.00  0.00
ATOM   2354  O   ASN   251     -12.430  27.360 -36.190  1.00  0.00
ATOM   2355  N   ILE   252     -10.400  27.150 -35.260  1.00  0.00
ATOM   2356  HN  ILE   252      -9.390  27.140 -35.370  1.00  0.00
ATOM   2357  CA  ILE   252     -11.010  27.040 -33.970  1.00  0.00
ATOM   2358  CB  ILE   252     -10.770  25.700 -33.310  1.00  0.00
ATOM   2359  CG2 ILE   252      -9.270  25.600 -32.980  1.00  0.00
ATOM   2360  CG1 ILE   252     -11.680  25.550 -32.070  1.00  0.00
ATOM   2361  CD1 ILE   252     -13.160  25.460 -32.400  1.00  0.00
ATOM   2362  C   ILE   252     -10.380  28.050 -33.070  1.00  0.00
ATOM   2363  O   ILE   252      -9.260  28.490 -33.310  1.00  0.00
ATOM   2364  N   ALA   253     -11.120  28.490 -32.030  1.00  0.00
ATOM   2365  HN  ALA   253     -12.070  28.170 -31.910  1.00  0.00
ATOM   2366  CA  ALA   253     -10.540  29.410 -31.100  1.00  0.00
ATOM   2367  CB  ALA   253     -11.340  30.720 -30.970  1.00  0.00
ATOM   2368  C   ALA   253     -10.580  28.730 -29.770  1.00  0.00
ATOM   2369  O   ALA   253     -11.630  28.270 -29.330  1.00  0.00
ATOM   2370  N   PHE   254      -9.420  28.660 -29.070  1.00  0.00
ATOM   2371  HN  PHE   254      -8.590  29.120 -29.410  1.00  0.00
ATOM   2372  CA  PHE   254      -9.390  27.930 -27.830  1.00  0.00
ATOM   2373  CB  PHE   254      -8.060  27.180 -27.610  1.00  0.00
ATOM   2374  CG  PHE   254      -7.880  26.230 -28.740  1.00  0.00
ATOM   2375  CD1 PHE   254      -7.230  26.630 -29.890  1.00  0.00
ATOM   2376  CD2 PHE   254      -8.360  24.940 -28.680  1.00  0.00
ATOM   2377  CE1 PHE   254      -7.060  25.760 -30.940  1.00  0.00
ATOM   2378  CE2 PHE   254      -8.190  24.070 -29.720  1.00  0.00
ATOM   2379  CZ  PHE   254      -7.540  24.480 -30.860  1.00  0.00
ATOM   2380  C   PHE   254      -9.560  28.880 -26.690  1.00  0.00
ATOM   2381  O   PHE   254      -9.030  29.990 -26.710  1.00  0.00
ATOM   2382  N   PHE   255     -10.280  28.450 -25.630  1.00  0.00
ATOM   2383  HN  PHE   255     -10.660  27.520 -25.580  1.00  0.00
ATOM   2384  CA  PHE   255     -10.490  29.410 -24.580  1.00  0.00
ATOM   2385  CB  PHE   255     -11.610  29.110 -23.560  1.00  0.00
ATOM   2386  CG  PHE   255     -11.150  28.330 -22.380  1.00  0.00
ATOM   2387  CD1 PHE   255     -10.560  28.990 -21.320  1.00  0.00
ATOM   2388  CD2 PHE   255     -11.330  26.970 -22.290  1.00  0.00
ATOM   2389  CE1 PHE   255     -10.130  28.310 -20.210  1.00  0.00
ATOM   2390  CE2 PHE   255     -10.900  26.290 -21.170  1.00  0.00
ATOM   2391  CZ  PHE   255     -10.300  26.950 -20.120  1.00  0.00
ATOM   2392  C   PHE   255      -9.190  29.550 -23.870  1.00  0.00
ATOM   2393  O   PHE   255      -8.420  28.600 -23.770  1.00  0.00
ATOM   2394  N   SER   256      -8.970  30.750 -23.300  1.00  0.00
ATOM   2395  HN  SER   256      -9.740  31.410 -23.310  1.00  0.00
ATOM   2396  CA  SER   256      -7.750  31.190 -22.680  1.00  0.00
ATOM   2397  CB  SER   256      -6.970  30.070 -21.970  1.00  0.00
ATOM   2398  OG  SER   256      -7.740  29.520 -20.920  1.00  0.00
ATOM   2399  HG  SER   256      -7.230  28.820 -20.490  1.00  0.00
ATOM   2400  C   SER   256      -6.820  31.770 -23.710  1.00  0.00
ATOM   2401  O   SER   256      -5.770  32.300 -23.340  1.00  0.00
ATOM   2402  N   THR   257      -7.200  31.740 -25.000  1.00  0.00
ATOM   2403  HN  THR   257      -8.090  31.320 -25.230  1.00  0.00
ATOM   2404  CA  THR   257      -6.400  32.280 -26.080  1.00  0.00
ATOM   2405  CB  THR   257      -6.670  31.580 -27.390  1.00  0.00
ATOM   2406  OG1 THR   257      -6.400  30.200 -27.250  1.00  0.00
ATOM   2407  HG1 THR   257      -6.570  29.750 -28.080  1.00  0.00
ATOM   2408  CG2 THR   257      -5.790  32.160 -28.510  1.00  0.00
ATOM   2409  C   THR   257      -6.720  33.750 -26.220  1.00  0.00
ATOM   2410  O   THR   257      -7.710  34.230 -25.660  1.00  0.00
ATOM   2411  N   MET   258      -5.880  34.500 -26.970  1.00  0.00
ATOM   2412  HN  MET   258      -5.100  34.040 -27.430  1.00  0.00
ATOM   2413  CA  MET   258      -6.040  35.920 -27.130  1.00  0.00
ATOM   2414  CB  MET   258      -4.820  36.700 -26.610  1.00  0.00
ATOM   2415  CG  MET   258      -4.490  36.410 -25.150  1.00  0.00
ATOM   2416  SD  MET   258      -3.820  34.740 -24.870  1.00  0.00
ATOM   2417  CE  MET   258      -3.930  34.810 -23.060  1.00  0.00
ATOM   2418  C   MET   258      -6.170  36.250 -28.590  1.00  0.00
ATOM   2419  O   MET   258      -5.490  35.660 -29.440  1.00  0.00
ATOM   2420  N   CYS   259      -7.040  37.220 -28.910  1.00  0.00
ATOM   2421  HN  CYS   259      -7.580  37.680 -28.190  1.00  0.00
ATOM   2422  CA  CYS   259      -7.220  37.610 -30.290  1.00  0.00
ATOM   2423  CB  CYS   259      -8.590  38.250 -30.570  1.00  0.00
ATOM   2424  SG  CYS   259      -9.960  37.080 -30.320  1.00  0.00
ATOM   2425  C   CYS   259      -6.170  38.620 -30.600  1.00  0.00
ATOM   2426  O   CYS   259      -6.320  39.800 -30.300  1.00  0.00
ATOM   2427  N   LEU   260      -5.070  38.160 -31.220  1.00  0.00
ATOM   2428  HN  LEU   260      -5.010  37.190 -31.480  1.00  0.00
ATOM   2429  CA  LEU   260      -3.980  39.050 -31.500  1.00  0.00
ATOM   2430  CB  LEU   260      -2.760  38.380 -32.140  1.00  0.00
ATOM   2431  CG  LEU   260      -1.640  39.400 -32.420  1.00  0.00
ATOM   2432  CD2 LEU   260      -0.570  38.830 -33.350  1.00  0.00
ATOM   2433  CD1 LEU   260      -1.070  39.990 -31.120  1.00  0.00
ATOM   2434  C   LEU   260      -4.420  40.100 -32.460  1.00  0.00
ATOM   2435  O   LEU   260      -4.140  41.280 -32.260  1.00  0.00
ATOM   2436  N   GLU   261      -5.130  39.720 -33.550  1.00  0.00
ATOM   2437  HN  GLU   261      -5.400  38.750 -33.700  1.00  0.00
ATOM   2438  CA  GLU   261      -5.470  40.760 -34.460  1.00  0.00
ATOM   2439  CB  GLU   261      -4.400  40.970 -35.540  1.00  0.00
ATOM   2440  CG  GLU   261      -4.610  42.210 -36.420  1.00  0.00
ATOM   2441  CD  GLU   261      -5.160  41.750 -37.760  1.00  0.00
ATOM   2442  OE1 GLU   261      -4.400  41.060 -38.500  1.00  0.00
ATOM   2443  OE2 GLU   261      -6.330  42.080 -38.070  1.00  0.00
ATOM   2444  C   GLU   261      -6.790  40.460 -35.110  1.00  0.00
ATOM   2445  O   GLU   261      -7.140  39.300 -35.320  1.00  0.00
ATOM   2446  N   GLY   262      -7.550  41.530 -35.430  1.00  0.00
ATOM   2447  HN  GLY   262      -7.240  42.450 -35.150  1.00  0.00
ATOM   2448  CA  GLY   262      -8.800  41.400 -36.140  1.00  0.00
ATOM   2449  C   GLY   262      -9.950  41.150 -35.210  1.00  0.00
ATOM   2450  O   GLY   262      -9.830  41.280 -33.990  1.00  0.00
ATOM   2451  N   THR   263     -11.120  40.830 -35.810  1.00  0.00
ATOM   2452  HN  THR   263     -11.160  40.800 -36.820  1.00  0.00
ATOM   2453  CA  THR   263     -12.320  40.520 -35.070  1.00  0.00
ATOM   2454  CB  THR   263     -13.200  41.720 -34.890  1.00  0.00
ATOM   2455  OG1 THR   263     -13.720  42.130 -36.140  1.00  0.00
ATOM   2456  HG1 THR   263     -14.290  42.900 -36.020  1.00  0.00
ATOM   2457  CG2 THR   263     -12.340  42.850 -34.300  1.00  0.00
ATOM   2458  C   THR   263     -13.130  39.550 -35.880  1.00  0.00
ATOM   2459  O   THR   263     -13.300  39.740 -37.080  1.00  0.00
ATOM   2460  N   ALA   264     -13.690  38.500 -35.250  1.00  0.00
ATOM   2461  HN  ALA   264     -13.550  38.390 -34.250  1.00  0.00
ATOM   2462  CA  ALA   264     -14.470  37.540 -35.980  1.00  0.00
ATOM   2463  CB  ALA   264     -13.650  36.330 -36.460  1.00  0.00
ATOM   2464  C   ALA   264     -15.540  37.010 -35.070  1.00  0.00
ATOM   2465  O   ALA   264     -15.540  37.280 -33.870  1.00  0.00
ATOM   2466  N   GLN   265     -16.500  36.260 -35.650  1.00  0.00
ATOM   2467  HN  GLN   265     -16.460  36.090 -36.640  1.00  0.00
ATOM   2468  CA  GLN   265     -17.580  35.710 -34.880  1.00  0.00
ATOM   2469  CB  GLN   265     -18.940  36.330 -35.250  1.00  0.00
ATOM   2470  CG  GLN   265     -20.130  35.780 -34.460  1.00  0.00
ATOM   2471  CD  GLN   265     -21.330  36.650 -34.780  1.00  0.00
ATOM   2472  OE1 GLN   265     -21.720  37.500 -33.990  1.00  0.00
ATOM   2473  NE2 GLN   265     -21.950  36.440 -35.980  1.00  0.00
ATOM   2474 HE22 GLN   265     -21.600  35.720 -36.610  1.00  0.00
ATOM   2475 HE21 GLN   265     -22.750  36.990 -36.240  1.00  0.00
ATOM   2476  C   GLN   265     -17.640  34.240 -35.190  1.00  0.00
ATOM   2477  O   GLN   265     -17.240  33.810 -36.260  1.00  0.00
ATOM   2478  N   GLY   266     -18.150  33.440 -34.230  1.00  0.00
ATOM   2479  HN  GLY   266     -18.480  33.830 -33.360  1.00  0.00
ATOM   2480  CA  GLY   266     -18.220  32.020 -34.450  1.00  0.00
ATOM   2481  C   GLY   266     -19.220  31.420 -33.510  1.00  0.00
ATOM   2482  O   GLY   266     -19.880  32.110 -32.740  1.00  0.00
ATOM   2483  N   LEU   267     -19.340  30.080 -33.570  1.00  0.00
ATOM   2484  HN  LEU   267     -18.720  29.580 -34.190  1.00  0.00
ATOM   2485  CA  LEU   267     -20.280  29.290 -32.820  1.00  0.00
ATOM   2486  CB  LEU   267     -21.010  28.320 -33.760  1.00  0.00
ATOM   2487  CG  LEU   267     -21.730  27.160 -33.060  1.00  0.00
ATOM   2488  CD2 LEU   267     -22.520  26.310 -34.070  1.00  0.00
ATOM   2489  CD1 LEU   267     -22.610  27.660 -31.930  1.00  0.00
ATOM   2490  C   LEU   267     -19.570  28.490 -31.750  1.00  0.00
ATOM   2491  O   LEU   267     -18.650  27.730 -32.050  1.00  0.00
ATOM   2492  N   VAL   268     -20.010  28.620 -30.480  1.00  0.00
ATOM   2493  HN  VAL   268     -20.810  29.210 -30.290  1.00  0.00
ATOM   2494  CA  VAL   268     -19.380  27.930 -29.380  1.00  0.00
ATOM   2495  CB  VAL   268     -19.830  28.430 -28.040  1.00  0.00
ATOM   2496  CG1 VAL   268     -19.220  27.530 -26.950  1.00  0.00
ATOM   2497  CG2 VAL   268     -19.450  29.910 -27.920  1.00  0.00
ATOM   2498  C   VAL   268     -19.710  26.470 -29.450  1.00  0.00
ATOM   2499  O   VAL   268     -20.880  26.090 -29.380  1.00  0.00
ATOM   2500  N   VAL   269     -18.670  25.630 -29.640  1.00  0.00
ATOM   2501  HN  VAL   269     -17.760  26.040 -29.760  1.00  0.00
ATOM   2502  CA  VAL   269     -18.770  24.190 -29.700  1.00  0.00
ATOM   2503  CB  VAL   269     -17.600  23.590 -30.430  1.00  0.00
ATOM   2504  CG1 VAL   269     -17.640  24.080 -31.880  1.00  0.00
ATOM   2505  CG2 VAL   269     -16.310  23.950 -29.680  1.00  0.00
ATOM   2506  C   VAL   269     -18.850  23.530 -28.350  1.00  0.00
ATOM   2507  O   VAL   269     -19.620  22.580 -28.180  1.00  0.00
ATOM   2508  N   ASN   270     -18.040  23.980 -27.360  1.00  0.00
ATOM   2509  HN  ASN   270     -17.460  24.790 -27.530  1.00  0.00
ATOM   2510  CA  ASN   270     -17.990  23.330 -26.080  1.00  0.00
ATOM   2511  CB  ASN   270     -16.890  22.250 -25.960  1.00  0.00
ATOM   2512  CG  ASN   270     -17.190  21.050 -26.840  1.00  0.00
ATOM   2513  OD1 ASN   270     -17.520  21.160 -28.020  1.00  0.00
ATOM   2514  ND2 ASN   270     -17.030  19.840 -26.240  1.00  0.00
ATOM   2515 HD22 ASN   270     -16.750  19.790 -25.270  1.00  0.00
ATOM   2516 HD21 ASN   270     -17.200  18.990 -26.760  1.00  0.00
ATOM   2517  C   ASN   270     -17.580  24.330 -25.040  1.00  0.00
ATOM   2518  O   ASN   270     -17.090  25.410 -25.360  1.00  0.00
ATOM   2519  N   THR   271     -17.770  23.990 -23.750  1.00  0.00
ATOM   2520  HN  THR   271     -18.240  23.120 -23.510  1.00  0.00
ATOM   2521  CA  THR   271     -17.310  24.870 -22.710  1.00  0.00
ATOM   2522  CB  THR   271     -18.300  25.880 -22.250  1.00  0.00
ATOM   2523  OG1 THR   271     -19.340  25.230 -21.550  1.00  0.00
ATOM   2524  HG1 THR   271     -19.980  25.890 -21.260  1.00  0.00
ATOM   2525  CG2 THR   271     -18.870  26.620 -23.470  1.00  0.00
ATOM   2526  C   THR   271     -16.940  24.040 -21.520  1.00  0.00
ATOM   2527  O   THR   271     -16.780  22.820 -21.610  1.00  0.00
ATOM   2528  N   GLY   272     -16.710  24.700 -20.360  1.00  0.00
ATOM   2529  HN  GLY   272     -16.730  25.710 -20.370  1.00  0.00
ATOM   2530  CA  GLY   272     -16.420  24.010 -19.140  1.00  0.00
ATOM   2531  C   GLY   272     -15.220  23.130 -19.310  1.00  0.00
ATOM   2532  O   GLY   272     -14.310  23.430 -20.090  1.00  0.00
ATOM   2533  N   ASP   273     -15.230  22.000 -18.590  1.00  0.00
ATOM   2534  HN  ASP   273     -16.060  21.830 -18.040  1.00  0.00
ATOM   2535  CA  ASP   273     -14.210  20.990 -18.520  1.00  0.00
ATOM   2536  CB  ASP   273     -14.540  19.880 -17.510  1.00  0.00
ATOM   2537  CG  ASP   273     -14.470  20.480 -16.110  1.00  0.00
ATOM   2538  OD1 ASP   273     -13.430  21.110 -15.780  1.00  0.00
ATOM   2539  OD2 ASP   273     -15.460  20.320 -15.350  1.00  0.00
ATOM   2540  C   ASP   273     -14.070  20.330 -19.860  1.00  0.00
ATOM   2541  O   ASP   273     -13.120  19.580 -20.100  1.00  0.00
ATOM   2542  N   ARG   274     -15.080  20.500 -20.730  1.00  0.00
ATOM   2543  HN  ARG   274     -15.860  21.080 -20.440  1.00  0.00
ATOM   2544  CA  ARG   274     -15.130  19.910 -22.040  1.00  0.00
ATOM   2545  CB  ARG   274     -16.500  20.080 -22.730  1.00  0.00
ATOM   2546  CG  ARG   274     -17.630  19.360 -22.000  1.00  0.00
ATOM   2547  CD  ARG   274     -17.200  18.030 -21.380  1.00  0.00
ATOM   2548  NE  ARG   274     -16.590  17.210 -22.460  1.00  0.00
ATOM   2549  HE  ARG   274     -16.500  17.590 -23.390  1.00  0.00
ATOM   2550  CZ  ARG   274     -16.160  15.940 -22.200  1.00  0.00
ATOM   2551  NH1 ARG   274     -16.330  15.410 -20.950  1.00  0.00
ATOM   2552 HH11 ARG   274     -16.780  15.950 -20.230  1.00  0.00
ATOM   2553 HH12 ARG   274     -16.020  14.470 -20.760  1.00  0.00
ATOM   2554  NH2 ARG   274     -15.570  15.200 -23.180  1.00  0.00
ATOM   2555 HH21 ARG   274     -15.440  15.600 -24.110  1.00  0.00
ATOM   2556 HH22 ARG   274     -15.250  14.260 -22.990  1.00  0.00
ATOM   2557  C   ARG   274     -14.110  20.510 -22.970  1.00  0.00
ATOM   2558  O   ARG   274     -13.670  19.850 -23.910  1.00  0.00
ATOM   2559  N   THR   275     -13.730  21.780 -22.750  1.00  0.00
ATOM   2560  HN  THR   275     -14.090  22.270 -21.940  1.00  0.00
ATOM   2561  CA  THR   275     -12.830  22.480 -23.630  1.00  0.00
ATOM   2562  CB  THR   275     -12.770  23.940 -23.320  1.00  0.00
ATOM   2563  OG1 THR   275     -12.380  24.100 -21.970  1.00  0.00
ATOM   2564  HG1 THR   275     -12.340  25.040 -21.760  1.00  0.00
ATOM   2565  CG2 THR   275     -14.160  24.540 -23.560  1.00  0.00
ATOM   2566  C   THR   275     -11.440  21.920 -23.540  1.00  0.00
ATOM   2567  O   THR   275     -11.130  21.110 -22.660  1.00  0.00
ATOM   2568  N   ILE   276     -10.560  22.380 -24.450  1.00  0.00
ATOM   2569  HN  ILE   276     -10.840  23.110 -25.080  1.00  0.00
ATOM   2570  CA  ILE   276      -9.230  21.850 -24.550  1.00  0.00
ATOM   2571  CB  ILE   276      -8.400  22.520 -25.610  1.00  0.00
ATOM   2572  CG2 ILE   276      -9.070  22.250 -26.970  1.00  0.00
ATOM   2573  CG1 ILE   276      -8.200  24.010 -25.300  1.00  0.00
ATOM   2574  CD1 ILE   276      -7.040  24.650 -26.060  1.00  0.00
ATOM   2575  C   ILE   276      -8.530  22.050 -23.240  1.00  0.00
ATOM   2576  O   ILE   276      -7.820  21.160 -22.780  1.00  0.00
ATOM   2577  N   ILE   277      -8.700  23.240 -22.630  1.00  0.00
ATOM   2578  HN  ILE   277      -9.300  23.930 -23.060  1.00  0.00
ATOM   2579  CA  ILE   277      -8.050  23.540 -21.390  1.00  0.00
ATOM   2580  CB  ILE   277      -8.280  24.960 -20.970  1.00  0.00
ATOM   2581  CG2 ILE   277      -7.330  25.260 -19.800  1.00  0.00
ATOM   2582  CG1 ILE   277      -8.120  25.900 -22.170  1.00  0.00
ATOM   2583  CD1 ILE   277      -6.880  25.630 -23.010  1.00  0.00
ATOM   2584  C   ILE   277      -8.660  22.690 -20.320  1.00  0.00
ATOM   2585  O   ILE   277      -7.970  22.100 -19.500  1.00  0.00
ATOM   2586  N   GLY   278     -10.010  22.600 -20.340  1.00  0.00
ATOM   2587  HN  GLY   278     -10.510  23.030 -21.100  1.00  0.00
ATOM   2588  CA  GLY   278     -10.750  21.910 -19.320  1.00  0.00
ATOM   2589  C   GLY   278     -10.330  20.480 -19.270  1.00  0.00
ATOM   2590  O   GLY   278     -10.240  19.890 -18.200  1.00  0.00
ATOM   2591  N   ARG   279     -10.070  19.870 -20.450  1.00  0.00
ATOM   2592  HN  ARG   279     -10.160  20.390 -21.310  1.00  0.00
ATOM   2593  CA  ARG   279      -9.680  18.490 -20.460  1.00  0.00
ATOM   2594  CB  ARG   279      -9.400  17.990 -21.880  1.00  0.00
ATOM   2595  CG  ARG   279     -10.650  17.690 -22.700  1.00  0.00
ATOM   2596  CD  ARG   279     -10.310  17.190 -24.110  1.00  0.00
ATOM   2597  NE  ARG   279     -11.430  16.310 -24.540  1.00  0.00
ATOM   2598  HE  ARG   279     -12.390  16.600 -24.410  1.00  0.00
ATOM   2599  CZ  ARG   279     -11.130  15.110 -25.110  1.00  0.00
ATOM   2600  NH1 ARG   279      -9.830  14.760 -25.320  1.00  0.00
ATOM   2601 HH11 ARG   279      -9.090  15.390 -25.050  1.00  0.00
ATOM   2602 HH12 ARG   279      -9.600  13.870 -25.740  1.00  0.00
ATOM   2603  NH2 ARG   279     -12.130  14.250 -25.470  1.00  0.00
ATOM   2604 HH21 ARG   279     -13.090  14.510 -25.320  1.00  0.00
ATOM   2605 HH22 ARG   279     -11.900  13.360 -25.890  1.00  0.00
ATOM   2606  C   ARG   279      -8.400  18.370 -19.700  1.00  0.00
ATOM   2607  O   ARG   279      -8.250  17.470 -18.880  1.00  0.00
ATOM   2608  N   ILE   280      -7.460  19.290 -19.950  1.00  0.00
ATOM   2609  HN  ILE   280      -7.670  20.040 -20.600  1.00  0.00
ATOM   2610  CA  ILE   280      -6.180  19.240 -19.330  1.00  0.00
ATOM   2611  CB  ILE   280      -5.300  20.390 -19.750  1.00  0.00
ATOM   2612  CG2 ILE   280      -4.070  20.410 -18.830  1.00  0.00
ATOM   2613  CG1 ILE   280      -4.980  20.310 -21.250  1.00  0.00
ATOM   2614  CD1 ILE   280      -4.340  21.580 -21.800  1.00  0.00
ATOM   2615  C   ILE   280      -6.360  19.360 -17.860  1.00  0.00
ATOM   2616  O   ILE   280      -5.730  18.640 -17.080  1.00  0.00
ATOM   2617  N   ALA   281      -7.270  20.250 -17.430  1.00  0.00
ATOM   2618  HN  ALA   281      -7.800  20.780 -18.100  1.00  0.00
ATOM   2619  CA  ALA   281      -7.480  20.470 -16.030  1.00  0.00
ATOM   2620  CB  ALA   281      -8.570  21.530 -15.760  1.00  0.00
ATOM   2621  C   ALA   281      -7.940  19.190 -15.430  1.00  0.00
ATOM   2622  O   ALA   281      -7.590  18.860 -14.300  1.00  0.00
ATOM   2623  N   SER   282      -8.780  18.430 -16.160  1.00  0.00
ATOM   2624  HN  SER   282      -9.050  18.740 -17.080  1.00  0.00
ATOM   2625  CA  SER   282      -9.290  17.180 -15.660  1.00  0.00
ATOM   2626  CB  SER   282     -10.330  16.550 -16.590  1.00  0.00
ATOM   2627  OG  SER   282     -11.480  17.390 -16.680  1.00  0.00
ATOM   2628  HG  SER   282     -12.130  16.990 -17.260  1.00  0.00
ATOM   2629  C   SER   282      -8.170  16.200 -15.510  1.00  0.00
ATOM   2630  O   SER   282      -8.090  15.470 -14.520  1.00  0.00
ATOM   2631  N   LEU   283      -7.250  16.170 -16.500  1.00  0.00
ATOM   2632  HN  LEU   283      -7.320  16.820 -17.260  1.00  0.00
ATOM   2633  CA  LEU   283      -6.180  15.220 -16.480  1.00  0.00
ATOM   2634  CB  LEU   283      -5.250  15.360 -17.700  1.00  0.00
ATOM   2635  CG  LEU   283      -5.940  15.190 -19.060  1.00  0.00
ATOM   2636  CD2 LEU   283      -6.730  13.880 -19.130  1.00  0.00
ATOM   2637  CD1 LEU   283      -4.920  15.340 -20.210  1.00  0.00
ATOM   2638  C   LEU   283      -5.330  15.490 -15.290  1.00  0.00
ATOM   2639  O   LEU   283      -4.920  14.570 -14.580  1.00  0.00
ATOM   2640  N   ALA   284      -5.040  16.770 -15.030  1.00  0.00
ATOM   2641  HN  ALA   284      -5.450  17.490 -15.610  1.00  0.00
ATOM   2642  CA  ALA   284      -4.180  17.150 -13.950  1.00  0.00
ATOM   2643  CB  ALA   284      -3.930  18.660 -13.880  1.00  0.00
ATOM   2644  C   ALA   284      -4.800  16.730 -12.660  1.00  0.00
ATOM   2645  O   ALA   284      -4.110  16.250 -11.760  1.00  0.00
ATOM   2646  N   SER   285      -6.120  16.910 -12.530  1.00  0.00
ATOM   2647  HN  SER   285      -6.650  17.280 -13.310  1.00  0.00
ATOM   2648  CA  SER   285      -6.790  16.590 -11.310  1.00  0.00
ATOM   2649  CB  SER   285      -8.280  16.980 -11.320  1.00  0.00
ATOM   2650  OG  SER   285      -8.880  16.620 -10.080  1.00  0.00
ATOM   2651  HG  SER   285      -9.810  16.860 -10.100  1.00  0.00
ATOM   2652  C   SER   285      -6.700  15.100 -11.110  1.00  0.00
ATOM   2653  O   SER   285      -6.720  14.630  -9.980  1.00  0.00
ATOM   2654  N   GLY   286      -6.650  14.340 -12.220  1.00  0.00
ATOM   2655  HN  GLY   286      -6.640  14.810 -13.110  1.00  0.00
ATOM   2656  CA  GLY   286      -6.610  12.910 -12.190  1.00  0.00
ATOM   2657  C   GLY   286      -5.320  12.370 -11.640  1.00  0.00
ATOM   2658  O   GLY   286      -5.330  11.400 -10.890  1.00  0.00
ATOM   2659  N   VAL   287      -4.170  12.980 -12.000  1.00  0.00
ATOM   2660  HN  VAL   287      -4.220  13.850 -12.510  1.00  0.00
ATOM   2661  CA  VAL   287      -2.890  12.430 -11.660  1.00  0.00
ATOM   2662  CB  VAL   287      -1.740  13.270 -12.130  1.00  0.00
ATOM   2663  CG1 VAL   287      -0.430  12.640 -11.630  1.00  0.00
ATOM   2664  CG2 VAL   287      -1.830  13.390 -13.660  1.00  0.00
ATOM   2665  C   VAL   287      -2.750  12.280 -10.180  1.00  0.00
ATOM   2666  O   VAL   287      -3.110  13.160  -9.400  1.00  0.00
ATOM   2667  N   GLU   288      -2.210  11.120  -9.760  1.00  0.00
ATOM   2668  HN  GLU   288      -1.970  10.410 -10.440  1.00  0.00
ATOM   2669  CA  GLU   288      -1.950  10.860  -8.380  1.00  0.00
ATOM   2670  CB  GLU   288      -2.230   9.410  -7.950  1.00  0.00
ATOM   2671  CG  GLU   288      -1.960   9.150  -6.470  1.00  0.00
ATOM   2672  CD  GLU   288      -2.170   7.660  -6.190  1.00  0.00
ATOM   2673  OE1 GLU   288      -2.450   6.920  -7.170  1.00  0.00
ATOM   2674  OE2 GLU   288      -2.050   7.260  -5.010  1.00  0.00
ATOM   2675  C   GLU   288      -0.490  11.090  -8.180  1.00  0.00
ATOM   2676  O   GLU   288       0.330  10.440  -8.830  1.00  0.00
ATOM   2677  N   ASN   289      -0.120  12.020  -7.290  1.00  0.00
ATOM   2678  HN  ASN   289      -0.810  12.560  -6.780  1.00  0.00
ATOM   2679  CA  ASN   289       1.280  12.230  -7.100  1.00  0.00
ATOM   2680  CB  ASN   289       1.660  13.670  -6.690  1.00  0.00
ATOM   2681  CG  ASN   289       1.070  13.960  -5.310  1.00  0.00
ATOM   2682  OD1 ASN   289       1.800  14.280  -4.370  1.00  0.00
ATOM   2683  ND2 ASN   289      -0.280  13.840  -5.180  1.00  0.00
ATOM   2684 HD22 ASN   289      -0.840  13.570  -5.980  1.00  0.00
ATOM   2685 HD21 ASN   289      -0.720  14.020  -4.290  1.00  0.00
ATOM   2686  C   ASN   289       1.700  11.300  -6.000  1.00  0.00
ATOM   2687  O   ASN   289       1.100  11.250  -4.930  1.00  0.00
ATOM   2688  N   GLU   290       2.750  10.510  -6.270  1.00  0.00
ATOM   2689  HN  GLU   290       3.210  10.580  -7.170  1.00  0.00
ATOM   2690  CA  GLU   290       3.230   9.560  -5.310  1.00  0.00
ATOM   2691  CB  GLU   290       4.070   8.440  -5.950  1.00  0.00
ATOM   2692  CG  GLU   290       4.260   7.230  -5.040  1.00  0.00
ATOM   2693  CD  GLU   290       5.040   6.160  -5.800  1.00  0.00
ATOM   2694  OE1 GLU   290       5.490   6.450  -6.930  1.00  0.00
ATOM   2695  OE2 GLU   290       5.180   5.040  -5.240  1.00  0.00
ATOM   2696  C   GLU   290       4.080  10.310  -4.330  1.00  0.00
ATOM   2697  O   GLU   290       4.580  11.390  -4.610  1.00  0.00
ATOM   2698  N   LYS   291       4.230   9.730  -3.120  1.00  0.00
ATOM   2699  HN  LYS   291       3.800   8.840  -2.940  1.00  0.00
ATOM   2700  CA  LYS   291       4.990  10.350  -2.060  1.00  0.00
ATOM   2701  CB  LYS   291       4.700   9.710  -0.690  1.00  0.00
ATOM   2702  CG  LYS   291       3.230   9.860  -0.270  1.00  0.00
ATOM   2703  CD  LYS   291       2.790   8.890   0.830  1.00  0.00
ATOM   2704  CE  LYS   291       2.860   9.460   2.250  1.00  0.00
ATOM   2705  NZ  LYS   291       2.320   8.470   3.210  1.00  0.00
ATOM   2706  HZ1 LYS   291       1.360   8.260   2.980  1.00  0.00
ATOM   2707  HZ2 LYS   291       2.870   7.620   3.160  1.00  0.00
ATOM   2708  HZ3 LYS   291       2.370   8.850   4.150  1.00  0.00
ATOM   2709  C   LYS   291       6.450  10.170  -2.350  1.00  0.00
ATOM   2710  O   LYS   291       6.880   9.160  -2.900  1.00  0.00
ATOM   2711  N   THR   292       7.250  11.180  -1.940  1.00  0.00
ATOM   2712  HN  THR   292       6.830  11.980  -1.500  1.00  0.00
ATOM   2713  CA  THR   292       8.680  11.170  -2.110  1.00  0.00
ATOM   2714  CB  THR   292       9.290  12.330  -1.380  1.00  0.00
ATOM   2715  OG1 THR   292       8.840  13.540  -1.970  1.00  0.00
ATOM   2716  HG1 THR   292       9.230  14.280  -1.500  1.00  0.00
ATOM   2717  CG2 THR   292      10.820  12.260  -1.380  1.00  0.00
ATOM   2718  C   THR   292       9.180   9.890  -1.510  1.00  0.00
ATOM   2719  O   THR   292       8.710   9.470  -0.460  1.00  0.00
ATOM   2720  N   PRO   293      10.110   9.230  -2.170  1.00  0.00
ATOM   2721  CA  PRO   293      10.640   7.980  -1.690  1.00  0.00
ATOM   2722  CD  PRO   293      10.980   9.840  -3.170  1.00  0.00
ATOM   2723  CB  PRO   293      11.780   7.620  -2.630  1.00  0.00
ATOM   2724  CG  PRO   293      12.260   8.990  -3.150  1.00  0.00
ATOM   2725  C   PRO   293      11.120   8.140  -0.280  1.00  0.00
ATOM   2726  O   PRO   293      11.010   7.190   0.490  1.00  0.00
ATOM   2727  N   ILE   294      11.710   9.300   0.060  1.00  0.00
ATOM   2728  HN  ILE   294      11.820  10.040  -0.620  1.00  0.00
ATOM   2729  CA  ILE   294      12.160   9.470   1.410  1.00  0.00
ATOM   2730  CB  ILE   294      12.940  10.730   1.620  1.00  0.00
ATOM   2731  CG2 ILE   294      13.110  10.950   3.130  1.00  0.00
ATOM   2732  CG1 ILE   294      14.260  10.620   0.860  1.00  0.00
ATOM   2733  CD1 ILE   294      15.040   9.350   1.230  1.00  0.00
ATOM   2734  C   ILE   294      10.970   9.490   2.290  1.00  0.00
ATOM   2735  O   ILE   294      10.970   8.850   3.340  1.00  0.00
ATOM   2736  N   ALA   295       9.910  10.190   1.880  1.00  0.00
ATOM   2737  HN  ALA   295       9.940  10.650   0.980  1.00  0.00
ATOM   2738  CA  ALA   295       8.740  10.300   2.690  1.00  0.00
ATOM   2739  CB  ALA   295       7.630  11.130   2.030  1.00  0.00
ATOM   2740  C   ALA   295       8.200   8.920   2.900  1.00  0.00
ATOM   2741  O   ALA   295       7.740   8.590   3.990  1.00  0.00
ATOM   2742  N   ILE   296       8.250   8.070   1.860  1.00  0.00
ATOM   2743  HN  ILE   296       8.640   8.360   0.980  1.00  0.00
ATOM   2744  CA  ILE   296       7.720   6.740   2.010  1.00  0.00
ATOM   2745  CB  ILE   296       7.790   5.950   0.740  1.00  0.00
ATOM   2746  CG2 ILE   296       7.350   4.510   1.050  1.00  0.00
ATOM   2747  CG1 ILE   296       6.950   6.620  -0.360  1.00  0.00
ATOM   2748  CD1 ILE   296       5.460   6.710  -0.010  1.00  0.00
ATOM   2749  C   ILE   296       8.550   6.000   3.020  1.00  0.00
ATOM   2750  O   ILE   296       8.020   5.420   3.960  1.00  0.00
ATOM   2751  N   GLU   297       9.890   6.050   2.870  1.00  0.00
ATOM   2752  HN  GLU   297      10.290   6.620   2.140  1.00  0.00
ATOM   2753  CA  GLU   297      10.730   5.280   3.730  1.00  0.00
ATOM   2754  CB  GLU   297      12.220   5.390   3.350  1.00  0.00
ATOM   2755  CG  GLU   297      12.500   5.010   1.890  1.00  0.00
ATOM   2756  CD  GLU   297      11.990   3.600   1.610  1.00  0.00
ATOM   2757  OE1 GLU   297      11.480   2.930   2.540  1.00  0.00
ATOM   2758  OE2 GLU   297      12.090   3.190   0.420  1.00  0.00
ATOM   2759  C   GLU   297      10.580   5.800   5.120  1.00  0.00
ATOM   2760  O   GLU   297      10.450   5.030   6.080  1.00  0.00
ATOM   2761  N   ILE   298      10.550   7.130   5.260  1.00  0.00
ATOM   2762  HN  ILE   298      10.590   7.700   4.430  1.00  0.00
ATOM   2763  CA  ILE   298      10.460   7.780   6.530  1.00  0.00
ATOM   2764  CB  ILE   298      10.580   9.280   6.450  1.00  0.00
ATOM   2765  CG2 ILE   298      11.970   9.590   5.860  1.00  0.00
ATOM   2766  CG1 ILE   298       9.430   9.940   5.670  1.00  0.00
ATOM   2767  CD1 ILE   298       8.140  10.100   6.480  1.00  0.00
ATOM   2768  C   ILE   298       9.160   7.410   7.170  1.00  0.00
ATOM   2769  O   ILE   298       9.090   7.260   8.390  1.00  0.00
ATOM   2770  N   GLU   299       8.100   7.290   6.360  1.00  0.00
ATOM   2771  HN  GLU   299       8.230   7.410   5.360  1.00  0.00
ATOM   2772  CA  GLU   299       6.780   6.990   6.840  1.00  0.00
ATOM   2773  CB  GLU   299       5.730   7.140   5.730  1.00  0.00
ATOM   2774  CG  GLU   299       4.280   7.200   6.230  1.00  0.00
ATOM   2775  CD  GLU   299       3.740   5.780   6.310  1.00  0.00
ATOM   2776  OE1 GLU   299       4.440   4.850   5.840  1.00  0.00
ATOM   2777  OE2 GLU   299       2.600   5.610   6.840  1.00  0.00
ATOM   2778  C   GLU   299       6.700   5.600   7.400  1.00  0.00
ATOM   2779  O   GLU   299       6.130   5.390   8.470  1.00  0.00
ATOM   2780  N   HIS   300       7.310   4.610   6.730  1.00  0.00
ATOM   2781  HN  HIS   300       7.850   4.810   5.910  1.00  0.00
ATOM   2782  CA  HIS   300       7.160   3.270   7.210  1.00  0.00
ATOM   2783  ND1 HIS   300       6.000   0.420   6.100  1.00  0.00
ATOM   2784  CG  HIS   300       7.220   0.850   6.580  1.00  0.00
ATOM   2785  CB  HIS   300       7.790   2.210   6.290  1.00  0.00
ATOM   2786  NE2 HIS   300       6.820  -1.250   7.320  1.00  0.00
ATOM   2787  HE2 HIS   300       6.920  -2.140   7.790  1.00  0.00
ATOM   2788  CD2 HIS   300       7.710  -0.180   7.330  1.00  0.00
ATOM   2789  CE1 HIS   300       5.810  -0.840   6.570  1.00  0.00
ATOM   2790  C   HIS   300       7.810   3.170   8.550  1.00  0.00
ATOM   2791  O   HIS   300       7.390   2.400   9.410  1.00  0.00
ATOM   2792  N   PHE   301       8.860   3.980   8.770  1.00  0.00
ATOM   2793  HN  PHE   301       9.140   4.630   8.040  1.00  0.00
ATOM   2794  CA  PHE   301       9.610   3.970   9.990  1.00  0.00
ATOM   2795  CB  PHE   301      10.740   5.020   9.990  1.00  0.00
ATOM   2796  CG  PHE   301      11.270   5.140  11.380  1.00  0.00
ATOM   2797  CD1 PHE   301      12.060   4.160  11.930  1.00  0.00
ATOM   2798  CD2 PHE   301      10.990   6.260  12.130  1.00  0.00
ATOM   2799  CE1 PHE   301      12.540   4.290  13.220  1.00  0.00
ATOM   2800  CE2 PHE   301      11.470   6.400  13.410  1.00  0.00
ATOM   2801  CZ  PHE   301      12.240   5.410  13.960  1.00  0.00
ATOM   2802  C   PHE   301       8.700   4.240  11.150  1.00  0.00
ATOM   2803  O   PHE   301       8.780   3.550  12.170  1.00  0.00
ATOM   2804  N   VAL   302       7.810   5.250  11.070  1.00  0.00
ATOM   2805  HN  VAL   302       7.750   5.820  10.240  1.00  0.00
ATOM   2806  CA  VAL   302       6.940   5.490  12.190  1.00  0.00
ATOM   2807  CB  VAL   302       5.990   6.650  12.020  1.00  0.00
ATOM   2808  CG1 VAL   302       5.100   6.410  10.790  1.00  0.00
ATOM   2809  CG2 VAL   302       5.150   6.750  13.300  1.00  0.00
ATOM   2810  C   VAL   302       6.100   4.280  12.380  1.00  0.00
ATOM   2811  O   VAL   302       5.820   3.890  13.520  1.00  0.00
ATOM   2812  N   ASP   303       5.670   3.660  11.270  1.00  0.00
ATOM   2813  HN  ASP   303       5.970   3.980  10.360  1.00  0.00
ATOM   2814  CA  ASP   303       4.810   2.520  11.380  1.00  0.00
ATOM   2815  CB  ASP   303       4.460   1.910  10.020  1.00  0.00
ATOM   2816  CG  ASP   303       3.530   2.860   9.290  1.00  0.00
ATOM   2817  OD1 ASP   303       3.080   3.840   9.940  1.00  0.00
ATOM   2818  OD2 ASP   303       3.250   2.620   8.090  1.00  0.00
ATOM   2819  C   ASP   303       5.510   1.470  12.180  1.00  0.00
ATOM   2820  O   ASP   303       4.920   0.890  13.090  1.00  0.00
ATOM   2821  N   ILE   304       6.780   1.190  11.850  1.00  0.00
ATOM   2822  HN  ILE   304       7.230   1.690  11.090  1.00  0.00
ATOM   2823  CA  ILE   304       7.530   0.180  12.550  1.00  0.00
ATOM   2824  CB  ILE   304       8.820  -0.180  11.860  1.00  0.00
ATOM   2825  CG2 ILE   304       8.470  -0.750  10.480  1.00  0.00
ATOM   2826  CG1 ILE   304       9.780   1.020  11.820  1.00  0.00
ATOM   2827  CD1 ILE   304      11.200   0.670  11.370  1.00  0.00
ATOM   2828  C   ILE   304       7.850   0.620  13.940  1.00  0.00
ATOM   2829  O   ILE   304       7.680  -0.150  14.890  1.00  0.00
ATOM   2830  N   ILE   305       8.290   1.880  14.110  1.00  0.00
ATOM   2831  HN  ILE   305       8.320   2.500  13.320  1.00  0.00
ATOM   2832  CA  ILE   305       8.710   2.340  15.400  1.00  0.00
ATOM   2833  CB  ILE   305       9.190   3.760  15.400  1.00  0.00
ATOM   2834  CG2 ILE   305       8.010   4.680  15.010  1.00  0.00
ATOM   2835  CG1 ILE   305       9.840   4.100  16.750  1.00  0.00
ATOM   2836  CD1 ILE   305      11.150   3.350  17.000  1.00  0.00
ATOM   2837  C   ILE   305       7.560   2.210  16.340  1.00  0.00
ATOM   2838  O   ILE   305       7.730   1.760  17.480  1.00  0.00
ATOM   2839  N   ALA   306       6.360   2.570  15.880  1.00  0.00
ATOM   2840  HN  ALA   306       6.250   2.880  14.930  1.00  0.00
ATOM   2841  CA  ALA   306       5.210   2.500  16.740  1.00  0.00
ATOM   2842  CB  ALA   306       3.920   2.940  16.030  1.00  0.00
ATOM   2843  C   ALA   306       5.030   1.080  17.170  1.00  0.00
ATOM   2844  O   ALA   306       4.750   0.820  18.340  1.00  0.00
ATOM   2845  N   GLY   307       5.200   0.120  16.250  1.00  0.00
ATOM   2846  HN  GLY   307       5.480   0.380  15.310  1.00  0.00
ATOM   2847  CA  GLY   307       4.990  -1.260  16.570  1.00  0.00
ATOM   2848  C   GLY   307       5.970  -1.720  17.600  1.00  0.00
ATOM   2849  O   GLY   307       5.610  -2.430  18.540  1.00  0.00
ATOM   2850  N   LEU   308       7.250  -1.340  17.470  1.00  0.00
ATOM   2851  HN  LEU   308       7.520  -0.700  16.730  1.00  0.00
ATOM   2852  CA  LEU   308       8.240  -1.840  18.380  1.00  0.00
ATOM   2853  CB  LEU   308       9.660  -1.340  18.050  1.00  0.00
ATOM   2854  CG  LEU   308      10.170  -1.800  16.680  1.00  0.00
ATOM   2855  CD2 LEU   308      10.040  -3.320  16.510  1.00  0.00
ATOM   2856  CD1 LEU   308      11.590  -1.280  16.400  1.00  0.00
ATOM   2857  C   LEU   308       7.930  -1.380  19.770  1.00  0.00
ATOM   2858  O   LEU   308       8.010  -2.160  20.720  1.00  0.00
ATOM   2859  N   ALA   309       7.530  -0.100  19.910  1.00  0.00
ATOM   2860  HN  ALA   309       7.370   0.460  19.090  1.00  0.00
ATOM   2861  CA  ALA   309       7.320   0.470  21.210  1.00  0.00
ATOM   2862  CB  ALA   309       6.850   1.930  21.140  1.00  0.00
ATOM   2863  C   ALA   309       6.270  -0.320  21.930  1.00  0.00
ATOM   2864  O   ALA   309       6.400  -0.590  23.120  1.00  0.00
ATOM   2865  N   ILE   310       5.200  -0.730  21.230  1.00  0.00
ATOM   2866  HN  ILE   310       5.120  -0.540  20.240  1.00  0.00
ATOM   2867  CA  ILE   310       4.150  -1.450  21.910  1.00  0.00
ATOM   2868  CB  ILE   310       2.970  -1.810  21.040  1.00  0.00
ATOM   2869  CG2 ILE   310       3.390  -2.910  20.060  1.00  0.00
ATOM   2870  CG1 ILE   310       1.780  -2.220  21.930  1.00  0.00
ATOM   2871  CD1 ILE   310       0.460  -2.340  21.160  1.00  0.00
ATOM   2872  C   ILE   310       4.740  -2.710  22.440  1.00  0.00
ATOM   2873  O   ILE   310       4.360  -3.170  23.510  1.00  0.00
ATOM   2874  N   LEU   311       5.670  -3.310  21.680  1.00  0.00
ATOM   2875  HN  LEU   311       5.960  -2.860  20.820  1.00  0.00
ATOM   2876  CA  LEU   311       6.260  -4.560  22.040  1.00  0.00
ATOM   2877  CB  LEU   311       7.200  -5.090  20.950  1.00  0.00
ATOM   2878  CG  LEU   311       7.800  -6.470  21.240  1.00  0.00
ATOM   2879  CD2 LEU   311       6.690  -7.480  21.570  1.00  0.00
ATOM   2880  CD1 LEU   311       8.910  -6.430  22.310  1.00  0.00
ATOM   2881  C   LEU   311       7.030  -4.400  23.310  1.00  0.00
ATOM   2882  O   LEU   311       6.950  -5.250  24.200  1.00  0.00
ATOM   2883  N   PHE   312       7.800  -3.300  23.450  1.00  0.00
ATOM   2884  HN  PHE   312       7.790  -2.590  22.730  1.00  0.00
ATOM   2885  CA  PHE   312       8.610  -3.130  24.620  1.00  0.00
ATOM   2886  CB  PHE   312       9.540  -1.910  24.530  1.00  0.00
ATOM   2887  CG  PHE   312      10.650  -2.350  23.640  1.00  0.00
ATOM   2888  CD1 PHE   312      10.490  -2.360  22.270  1.00  0.00
ATOM   2889  CD2 PHE   312      11.840  -2.790  24.170  1.00  0.00
ATOM   2890  CE1 PHE   312      11.510  -2.780  21.450  1.00  0.00
ATOM   2891  CE2 PHE   312      12.860  -3.210  23.360  1.00  0.00
ATOM   2892  CZ  PHE   312      12.700  -3.200  21.990  1.00  0.00
ATOM   2893  C   PHE   312       7.740  -3.040  25.830  1.00  0.00
ATOM   2894  O   PHE   312       8.060  -3.600  26.870  1.00  0.00
ATOM   2895  N   GLY   313       6.600  -2.330  25.720  1.00  0.00
ATOM   2896  HN  GLY   313       6.350  -1.900  24.840  1.00  0.00
ATOM   2897  CA  GLY   313       5.720  -2.190  26.850  1.00  0.00
ATOM   2898  C   GLY   313       5.220  -3.530  27.290  1.00  0.00
ATOM   2899  O   GLY   313       5.170  -3.820  28.480  1.00  0.00
ATOM   2900  N   ALA   314       4.820  -4.380  26.330  1.00  0.00
ATOM   2901  HN  ALA   314       4.890  -4.120  25.360  1.00  0.00
ATOM   2902  CA  ALA   314       4.310  -5.680  26.680  1.00  0.00
ATOM   2903  CB  ALA   314       3.870  -6.500  25.450  1.00  0.00
ATOM   2904  C   ALA   314       5.390  -6.440  27.360  1.00  0.00
ATOM   2905  O   ALA   314       5.160  -7.140  28.340  1.00  0.00
ATOM   2906  N   THR   315       6.630  -6.310  26.850  1.00  0.00
ATOM   2907  HN  THR   315       6.780  -5.700  26.060  1.00  0.00
ATOM   2908  CA  THR   315       7.740  -7.040  27.400  1.00  0.00
ATOM   2909  CB  THR   315       9.010  -6.800  26.640  1.00  0.00
ATOM   2910  OG1 THR   315       8.850  -7.180  25.280  1.00  0.00
ATOM   2911  HG1 THR   315       9.670  -7.020  24.810  1.00  0.00
ATOM   2912  CG2 THR   315      10.130  -7.620  27.290  1.00  0.00
ATOM   2913  C   THR   315       7.970  -6.600  28.810  1.00  0.00
ATOM   2914  O   THR   315       8.100  -7.430  29.710  1.00  0.00
ATOM   2915  N   PHE   316       7.960  -5.270  29.050  1.00  0.00
ATOM   2916  HN  PHE   316       7.750  -4.630  28.300  1.00  0.00
ATOM   2917  CA  PHE   316       8.250  -4.750  30.360  1.00  0.00
ATOM   2918  CB  PHE   316       8.100  -3.230  30.440  1.00  0.00
ATOM   2919  CG  PHE   316       7.980  -2.870  31.880  1.00  0.00
ATOM   2920  CD1 PHE   316       9.080  -2.830  32.710  1.00  0.00
ATOM   2921  CD2 PHE   316       6.740  -2.580  32.400  1.00  0.00
ATOM   2922  CE1 PHE   316       8.930  -2.510  34.040  1.00  0.00
ATOM   2923  CE2 PHE   316       6.590  -2.250  33.730  1.00  0.00
ATOM   2924  CZ  PHE   316       7.690  -2.220  34.550  1.00  0.00
ATOM   2925  C   PHE   316       7.320  -5.320  31.380  1.00  0.00
ATOM   2926  O   PHE   316       7.750  -5.790  32.430  1.00  0.00
ATOM   2927  N   PHE   317       6.010  -5.440  31.020  1.00  0.00
ATOM   2928  HN  PHE   317       5.690  -5.130  30.120  1.00  0.00
ATOM   2929  CA  PHE   317       5.100  -6.010  31.980  1.00  0.00
ATOM   2930  CB  PHE   317       3.610  -5.810  31.660  1.00  0.00
ATOM   2931  CG  PHE   317       3.260  -4.390  31.960  1.00  0.00
ATOM   2932  CD1 PHE   317       3.170  -3.960  33.260  1.00  0.00
ATOM   2933  CD2 PHE   317       2.980  -3.490  30.950  1.00  0.00
ATOM   2934  CE1 PHE   317       2.840  -2.660  33.560  1.00  0.00
ATOM   2935  CE2 PHE   317       2.650  -2.190  31.240  1.00  0.00
ATOM   2936  CZ  PHE   317       2.580  -1.770  32.540  1.00  0.00
ATOM   2937  C   PHE   317       5.340  -7.490  32.090  1.00  0.00
ATOM   2938  O   PHE   317       5.470  -8.210  31.110  1.00  0.00
ATOM   2939  N   ILE   318       5.410  -7.970  33.350  1.00  0.00
ATOM   2940  HN  ILE   318       5.300  -7.330  34.120  1.00  0.00
ATOM   2941  CA  ILE   318       5.630  -9.360  33.620  1.00  0.00
ATOM   2942  CB  ILE   318       6.470  -9.590  34.850  1.00  0.00
ATOM   2943  CG2 ILE   318       6.550 -11.090  35.150  1.00  0.00
ATOM   2944  CG1 ILE   318       7.850  -8.930  34.700  1.00  0.00
ATOM   2945  CD1 ILE   318       8.640  -8.870  36.000  1.00  0.00
ATOM   2946  C   ILE   318       4.280  -9.920  33.880  1.00  0.00
ATOM   2947  O   ILE   318       3.530  -9.360  34.690  1.00  0.00
ATOM   2948  N   VAL   319       3.900 -11.010  33.170  1.00  0.00
ATOM   2949  HN  VAL   319       4.530 -11.400  32.490  1.00  0.00
ATOM   2950  CA  VAL   319       2.620 -11.600  33.380  1.00  0.00
ATOM   2951  CB  VAL   319       2.060 -12.290  32.160  1.00  0.00
ATOM   2952  CG1 VAL   319       1.790 -11.230  31.080  1.00  0.00
ATOM   2953  CG2 VAL   319       3.030 -13.390  31.710  1.00  0.00
ATOM   2954  C   VAL   319       2.760 -12.610  34.460  1.00  0.00
ATOM   2955  O   VAL   319       3.650 -13.460  34.430  1.00  0.00
ATOM   2956  N   ALA   320       1.900 -12.500  35.490  1.00  0.00
ATOM   2957  HN  ALA   320       1.220 -11.750  35.460  1.00  0.00
ATOM   2958  CA  ALA   320       1.890 -13.380  36.610  1.00  0.00
ATOM   2959  CB  ALA   320       3.070 -13.170  37.580  1.00  0.00
ATOM   2960  C   ALA   320       0.660 -13.000  37.340  1.00  0.00
ATOM   2961  O   ALA   320       0.080 -11.960  37.060  1.00  0.00
ATOM   2962  N   MET   321       0.220 -13.830  38.290  1.00  0.00
ATOM   2963  HN  MET   321       0.700 -14.700  38.510  1.00  0.00
ATOM   2964  CA  MET   321      -0.970 -13.440  38.990  1.00  0.00
ATOM   2965  CB  MET   321      -1.730 -14.620  39.610  1.00  0.00
ATOM   2966  CG  MET   321      -2.250 -15.620  38.580  1.00  0.00
ATOM   2967  SD  MET   321      -3.550 -14.980  37.480  1.00  0.00
ATOM   2968  CE  MET   321      -4.890 -15.220  38.680  1.00  0.00
ATOM   2969  C   MET   321      -0.510 -12.560  40.110  1.00  0.00
ATOM   2970  O   MET   321       0.130 -13.010  41.060  1.00  0.00
ATOM   2971  N   CYS   322      -0.810 -11.260  40.010  1.00  0.00
ATOM   2972  HN  CYS   322      -1.310 -10.890  39.210  1.00  0.00
ATOM   2973  CA  CYS   322      -0.390 -10.410  41.080  1.00  0.00
ATOM   2974  CB  CYS   322       0.780  -9.490  40.720  1.00  0.00
ATOM   2975  SG  CYS   322       2.310 -10.410  40.360  1.00  0.00
ATOM   2976  C   CYS   322      -1.550  -9.560  41.390  1.00  0.00
ATOM   2977  O   CYS   322      -2.400  -9.330  40.530  1.00  0.00
ATOM   2978  N   ILE   323      -1.630  -9.070  42.640  1.00  0.00
ATOM   2979  HN  ILE   323      -0.930  -9.320  43.320  1.00  0.00
ATOM   2980  CA  ILE   323      -2.700  -8.190  42.990  1.00  0.00
ATOM   2981  CB  ILE   323      -3.400  -8.600  44.270  1.00  0.00
ATOM   2982  CG2 ILE   323      -2.350  -8.690  45.400  1.00  0.00
ATOM   2983  CG1 ILE   323      -4.600  -7.700  44.580  1.00  0.00
ATOM   2984  CD1 ILE   323      -5.770  -7.860  43.610  1.00  0.00
ATOM   2985  C   ILE   323      -2.080  -6.840  43.140  1.00  0.00
ATOM   2986  O   ILE   323      -1.170  -6.650  43.950  1.00  0.00
ATOM   2987  N   GLY   324      -2.540  -5.870  42.340  1.00  0.00
ATOM   2988  HN  GLY   324      -3.290  -6.070  41.690  1.00  0.00
ATOM   2989  CA  GLY   324      -1.980  -4.560  42.390  1.00  0.00
ATOM   2990  C   GLY   324      -2.550  -3.840  41.230  1.00  0.00
ATOM   2991  O   GLY   324      -3.250  -4.440  40.410  1.00  0.00
ATOM   2992  N   TYR   325      -2.260  -2.540  41.110  1.00  0.00
ATOM   2993  HN  TYR   325      -1.640  -2.090  41.770  1.00  0.00
ATOM   2994  CA  TYR   325      -2.830  -1.770  40.040  1.00  0.00
ATOM   2995  CB  TYR   325      -3.640  -0.530  40.490  1.00  0.00
ATOM   2996  CG  TYR   325      -4.860  -0.950  41.250  1.00  0.00
ATOM   2997  CD1 TYR   325      -6.020  -1.290  40.590  1.00  0.00
ATOM   2998  CD2 TYR   325      -4.840  -1.010  42.630  1.00  0.00
ATOM   2999  CE1 TYR   325      -7.140  -1.690  41.290  1.00  0.00
ATOM   3000  CE2 TYR   325      -5.950  -1.400  43.330  1.00  0.00
ATOM   3001  CZ  TYR   325      -7.110  -1.740  42.660  1.00  0.00
ATOM   3002  OH  TYR   325      -8.250  -2.140  43.390  1.00  0.00
ATOM   3003  HH  TYR   325      -8.060  -2.120  44.330  1.00  0.00
ATOM   3004  C   TYR   325      -1.690  -1.260  39.240  1.00  0.00
ATOM   3005  O   TYR   325      -0.530  -1.390  39.630  1.00  0.00
ATOM   3006  N   THR   326      -1.990  -0.660  38.060  1.00  0.00
ATOM   3007  HN  THR   326      -2.960  -0.590  37.780  1.00  0.00
ATOM   3008  CA  THR   326      -0.980  -0.130  37.190  1.00  0.00
ATOM   3009  CB  THR   326      -1.530   0.450  35.920  1.00  0.00
ATOM   3010  OG1 THR   326      -2.360   1.560  36.220  1.00  0.00
ATOM   3011  HG1 THR   326      -2.710   1.930  35.410  1.00  0.00
ATOM   3012  CG2 THR   326      -2.350  -0.640  35.200  1.00  0.00
ATOM   3013  C   THR   326      -0.290   0.980  37.900  1.00  0.00
ATOM   3014  O   THR   326      -0.930   1.950  38.330  1.00  0.00
ATOM   3015  N   PHE   327       1.040   0.860  38.050  1.00  0.00
ATOM   3016  HN  PHE   327       1.530   0.090  37.620  1.00  0.00
ATOM   3017  CA  PHE   327       1.770   1.830  38.810  1.00  0.00
ATOM   3018  CB  PHE   327       2.770   1.210  39.830  1.00  0.00
ATOM   3019  CG  PHE   327       3.660   0.150  39.240  1.00  0.00
ATOM   3020  CD1 PHE   327       4.870   0.460  38.670  1.00  0.00
ATOM   3021  CD2 PHE   327       3.280  -1.170  39.300  1.00  0.00
ATOM   3022  CE1 PHE   327       5.670  -0.520  38.140  1.00  0.00
ATOM   3023  CE2 PHE   327       4.080  -2.160  38.770  1.00  0.00
ATOM   3024  CZ  PHE   327       5.280  -1.840  38.190  1.00  0.00
ATOM   3025  C   PHE   327       2.390   2.900  37.970  1.00  0.00
ATOM   3026  O   PHE   327       2.760   2.720  36.810  1.00  0.00
ATOM   3027  N   LEU   328       2.530   4.070  38.620  1.00  0.00
ATOM   3028  HN  LEU   328       2.280   4.060  39.600  1.00  0.00
ATOM   3029  CA  LEU   328       2.970   5.310  38.090  1.00  0.00
ATOM   3030  CB  LEU   328       3.130   6.410  39.170  1.00  0.00
ATOM   3031  CG  LEU   328       1.800   6.950  39.720  1.00  0.00
ATOM   3032  CD2 LEU   328       0.900   7.470  38.590  1.00  0.00
ATOM   3033  CD1 LEU   328       2.060   8.040  40.780  1.00  0.00
ATOM   3034  C   LEU   328       4.320   5.100  37.480  1.00  0.00
ATOM   3035  O   LEU   328       4.580   5.610  36.400  1.00  0.00
ATOM   3036  N   ARG   329       5.210   4.320  38.120  1.00  0.00
ATOM   3037  HN  ARG   329       4.950   3.850  38.980  1.00  0.00
ATOM   3038  CA  ARG   329       6.520   4.170  37.560  1.00  0.00
ATOM   3039  CB  ARG   329       7.450   3.250  38.370  1.00  0.00
ATOM   3040  CG  ARG   329       8.870   3.170  37.810  1.00  0.00
ATOM   3041  CD  ARG   329       9.710   2.080  38.480  1.00  0.00
ATOM   3042  NE  ARG   329       9.650   2.330  39.950  1.00  0.00
ATOM   3043  HE  ARG   329       9.280   3.200  40.300  1.00  0.00
ATOM   3044  CZ  ARG   329      10.110   1.390  40.820  1.00  0.00
ATOM   3045  NH1 ARG   329      10.660   0.230  40.340  1.00  0.00
ATOM   3046 HH11 ARG   329      10.730   0.080  39.350  1.00  0.00
ATOM   3047 HH12 ARG   329      11.000  -0.470  40.990  1.00  0.00
ATOM   3048  NH2 ARG   329      10.020   1.600  42.170  1.00  0.00
ATOM   3049 HH21 ARG   329       9.610   2.450  42.520  1.00  0.00
ATOM   3050 HH22 ARG   329      10.350   0.900  42.810  1.00  0.00
ATOM   3051  C   ARG   329       6.390   3.550  36.200  1.00  0.00
ATOM   3052  O   ARG   329       7.110   3.920  35.280  1.00  0.00
ATOM   3053  N   ALA   330       5.470   2.590  36.050  1.00  0.00
ATOM   3054  HN  ALA   330       4.890   2.330  36.840  1.00  0.00
ATOM   3055  CA  ALA   330       5.290   1.920  34.800  1.00  0.00
ATOM   3056  CB  ALA   330       4.210   0.820  34.860  1.00  0.00
ATOM   3057  C   ALA   330       4.860   2.920  33.770  1.00  0.00
ATOM   3058  O   ALA   330       5.280   2.860  32.620  1.00  0.00
ATOM   3059  N   MET   331       3.960   3.850  34.160  1.00  0.00
ATOM   3060  HN  MET   331       3.600   3.820  35.100  1.00  0.00
ATOM   3061  CA  MET   331       3.500   4.870  33.260  1.00  0.00
ATOM   3062  CB  MET   331       2.310   5.670  33.830  1.00  0.00
ATOM   3063  CG  MET   331       1.790   6.750  32.890  1.00  0.00
ATOM   3064  SD  MET   331       0.280   7.580  33.470  1.00  0.00
ATOM   3065  CE  MET   331       1.090   8.360  34.900  1.00  0.00
ATOM   3066  C   MET   331       4.610   5.830  32.980  1.00  0.00
ATOM   3067  O   MET   331       4.760   6.320  31.860  1.00  0.00
ATOM   3068  N   VAL   332       5.430   6.120  34.010  1.00  0.00
ATOM   3069  HN  VAL   332       5.300   5.610  34.870  1.00  0.00
ATOM   3070  CA  VAL   332       6.460   7.090  33.950  1.00  0.00
ATOM   3071  CB  VAL   332       7.250   7.230  35.220  1.00  0.00
ATOM   3072  CG1 VAL   332       8.440   8.170  34.950  1.00  0.00
ATOM   3073  CG2 VAL   332       6.320   7.720  36.330  1.00  0.00
ATOM   3074  C   VAL   332       7.430   6.690  32.880  1.00  0.00
ATOM   3075  O   VAL   332       7.970   7.540  32.180  1.00  0.00
ATOM   3076  N   PHE   333       7.700   5.380  32.760  1.00  0.00
ATOM   3077  HN  PHE   333       7.230   4.720  33.370  1.00  0.00
ATOM   3078  CA  PHE   333       8.640   4.890  31.790  1.00  0.00
ATOM   3079  CB  PHE   333       9.190   3.460  32.050  1.00  0.00
ATOM   3080  CG  PHE   333       8.210   2.370  31.820  1.00  0.00
ATOM   3081  CD1 PHE   333       7.810   2.030  30.550  1.00  0.00
ATOM   3082  CD2 PHE   333       7.720   1.630  32.870  1.00  0.00
ATOM   3083  CE1 PHE   333       6.920   1.010  30.320  1.00  0.00
ATOM   3084  CE2 PHE   333       6.830   0.600  32.660  1.00  0.00
ATOM   3085  CZ  PHE   333       6.420   0.290  31.380  1.00  0.00
ATOM   3086  C   PHE   333       8.090   4.960  30.400  1.00  0.00
ATOM   3087  O   PHE   333       8.850   4.950  29.440  1.00  0.00
ATOM   3088  N   PHE   334       6.750   4.910  30.240  1.00  0.00
ATOM   3089  HN  PHE   334       6.170   4.850  31.060  1.00  0.00
ATOM   3090  CA  PHE   334       6.120   4.960  28.950  1.00  0.00
ATOM   3091  CB  PHE   334       4.590   4.820  29.070  1.00  0.00
ATOM   3092  CG  PHE   334       3.970   4.890  27.710  1.00  0.00
ATOM   3093  CD1 PHE   334       3.810   3.750  26.960  1.00  0.00
ATOM   3094  CD2 PHE   334       3.560   6.090  27.200  1.00  0.00
ATOM   3095  CE1 PHE   334       3.230   3.820  25.710  1.00  0.00
ATOM   3096  CE2 PHE   334       2.980   6.170  25.950  1.00  0.00
ATOM   3097  CZ  PHE   334       2.820   5.030  25.210  1.00  0.00
ATOM   3098  C   PHE   334       6.400   6.270  28.270  1.00  0.00
ATOM   3099  O   PHE   334       6.830   6.310  27.120  1.00  0.00
ATOM   3100  N   MET   335       6.210   7.400  28.960  1.00  0.00
ATOM   3101  HN  MET   335       5.920   7.360  29.930  1.00  0.00
ATOM   3102  CA  MET   335       6.410   8.670  28.320  1.00  0.00
ATOM   3103  CB  MET   335       6.140   9.840  29.260  1.00  0.00
ATOM   3104  CG  MET   335       7.140   9.920  30.410  1.00  0.00
ATOM   3105  SD  MET   335       6.870  11.290  31.580  1.00  0.00
ATOM   3106  CE  MET   335       8.310  10.870  32.600  1.00  0.00
ATOM   3107  C   MET   335       7.850   8.730  27.900  1.00  0.00
ATOM   3108  O   MET   335       8.190   9.240  26.840  1.00  0.00
ATOM   3109  N   ALA   336       8.730   8.220  28.770  1.00  0.00
ATOM   3110  HN  ALA   336       8.360   7.870  29.640  1.00  0.00
ATOM   3111  CA  ALA   336      10.140   8.130  28.580  1.00  0.00
ATOM   3112  CB  ALA   336      10.880   7.630  29.830  1.00  0.00
ATOM   3113  C   ALA   336      10.420   7.150  27.470  1.00  0.00
ATOM   3114  O   ALA   336      11.560   7.070  27.010  1.00  0.00
ATOM   3115  N   ILE   337       9.480   6.230  27.190  1.00  0.00
ATOM   3116  HN  ILE   337       8.630   6.180  27.730  1.00  0.00
ATOM   3117  CA  ILE   337       9.690   5.320  26.090  1.00  0.00
ATOM   3118  CB  ILE   337       8.860   4.050  26.080  1.00  0.00
ATOM   3119  CG2 ILE   337       7.490   4.290  25.440  1.00  0.00
ATOM   3120  CG1 ILE   337       9.600   2.990  25.260  1.00  0.00
ATOM   3121  CD1 ILE   337       8.900   1.640  25.250  1.00  0.00
ATOM   3122  C   ILE   337       9.470   6.000  24.780  1.00  0.00
ATOM   3123  O   ILE   337      10.190   5.730  23.820  1.00  0.00
ATOM   3124  N   VAL   338       8.410   6.840  24.670  1.00  0.00
ATOM   3125  HN  VAL   338       7.830   7.010  25.480  1.00  0.00
ATOM   3126  CA  VAL   338       8.090   7.480  23.430  1.00  0.00
ATOM   3127  CB  VAL   338       6.720   8.110  23.430  1.00  0.00
ATOM   3128  CG1 VAL   338       5.680   6.990  23.550  1.00  0.00
ATOM   3129  CG2 VAL   338       6.630   9.140  24.570  1.00  0.00
ATOM   3130  C   VAL   338       9.110   8.520  23.050  1.00  0.00
ATOM   3131  O   VAL   338       9.760   8.410  22.010  1.00  0.00
ATOM   3132  N   VAL   339       9.350   9.490  23.940  1.00  0.00
ATOM   3133  HN  VAL   339       8.910   9.460  24.850  1.00  0.00
ATOM   3134  CA  VAL   339      10.240  10.580  23.640  1.00  0.00
ATOM   3135  CB  VAL   339      10.370  11.560  24.760  1.00  0.00
ATOM   3136  CG1 VAL   339       8.990  12.210  24.970  1.00  0.00
ATOM   3137  CG2 VAL   339      10.920  10.840  26.000  1.00  0.00
ATOM   3138  C   VAL   339      11.580  10.000  23.330  1.00  0.00
ATOM   3139  O   VAL   339      12.380  10.620  22.630  1.00  0.00
ATOM   3140  N   ALA   340      11.890   8.830  23.910  1.00  0.00
ATOM   3141  HN  ALA   340      11.240   8.420  24.560  1.00  0.00
ATOM   3142  CA  ALA   340      13.130   8.160  23.650  1.00  0.00
ATOM   3143  CB  ALA   340      13.350   6.960  24.580  1.00  0.00
ATOM   3144  C   ALA   340      13.190   7.650  22.230  1.00  0.00
ATOM   3145  O   ALA   340      14.210   7.790  21.560  1.00  0.00
ATOM   3146  N   TYR   341      12.110   6.980  21.760  1.00  0.00
ATOM   3147  HN  TYR   341      11.320   6.850  22.370  1.00  0.00
ATOM   3148  CA  TYR   341      12.050   6.430  20.420  1.00  0.00
ATOM   3149  CB  TYR   341      10.840   5.520  20.130  1.00  0.00
ATOM   3150  CG  TYR   341      10.980   4.150  20.680  1.00  0.00
ATOM   3151  CD1 TYR   341      11.660   3.190  19.960  1.00  0.00
ATOM   3152  CD2 TYR   341      10.420   3.800  21.890  1.00  0.00
ATOM   3153  CE1 TYR   341      11.790   1.910  20.440  1.00  0.00
ATOM   3154  CE2 TYR   341      10.540   2.530  22.380  1.00  0.00
ATOM   3155  CZ  TYR   341      11.220   1.590  21.650  1.00  0.00
ATOM   3156  OH  TYR   341      11.350   0.270  22.150  1.00  0.00
ATOM   3157  HH  TYR   341      10.900   0.210  23.000  1.00  0.00
ATOM   3158  C   TYR   341      11.880   7.490  19.380  1.00  0.00
ATOM   3159  O   TYR   341      12.600   7.520  18.380  1.00  0.00
ATOM   3160  N   VAL   342      10.890   8.380  19.580  1.00  0.00
ATOM   3161  HN  VAL   342      10.390   8.390  20.450  1.00  0.00
ATOM   3162  CA  VAL   342      10.560   9.320  18.550  1.00  0.00
ATOM   3163  CB  VAL   342       9.330  10.140  18.850  1.00  0.00
ATOM   3164  CG1 VAL   342       9.590  11.010  20.090  1.00  0.00
ATOM   3165  CG2 VAL   342       8.960  10.940  17.590  1.00  0.00
ATOM   3166  C   VAL   342      11.720  10.250  18.340  1.00  0.00
ATOM   3167  O   VAL   342      12.200  10.920  19.250  1.00  0.00
ATOM   3168  N   PRO   343      12.140  10.280  17.110  1.00  0.00
ATOM   3169  CA  PRO   343      13.250  11.060  16.630  1.00  0.00
ATOM   3170  CD  PRO   343      11.830   9.180  16.210  1.00  0.00
ATOM   3171  CB  PRO   343      13.710  10.400  15.330  1.00  0.00
ATOM   3172  CG  PRO   343      12.500   9.550  14.880  1.00  0.00
ATOM   3173  C   PRO   343      12.870  12.490  16.440  1.00  0.00
ATOM   3174  O   PRO   343      13.350  13.100  15.480  1.00  0.00
ATOM   3175  N   GLU   344      11.950  13.040  17.250  1.00  0.00
ATOM   3176  HN  GLU   344      11.570  12.490  18.010  1.00  0.00
ATOM   3177  CA  GLU   344      11.520  14.390  17.060  1.00  0.00
ATOM   3178  CB  GLU   344      10.670  14.950  18.210  1.00  0.00
ATOM   3179  CG  GLU   344      10.240  16.390  17.960  1.00  0.00
ATOM   3180  CD  GLU   344       9.910  16.990  19.310  1.00  0.00
ATOM   3181  OE1 GLU   344      10.130  16.280  20.320  1.00  0.00
ATOM   3182  OE2 GLU   344       9.460  18.170  19.360  1.00  0.00
ATOM   3183  C   GLU   344      12.710  15.310  16.980  1.00  0.00
ATOM   3184  O   GLU   344      13.750  15.060  17.590  1.00  0.00
ATOM   3185  N   GLY   345      12.550  16.390  16.200  1.00  0.00
ATOM   3186  HN  GLY   345      11.680  16.520  15.710  1.00  0.00
ATOM   3187  CA  GLY   345      13.580  17.370  16.010  1.00  0.00
ATOM   3188  C   GLY   345      14.250  17.080  14.710  1.00  0.00
ATOM   3189  O   GLY   345      14.900  17.940  14.120  1.00  0.00
ATOM   3190  N   LEU   346      14.080  15.840  14.220  1.00  0.00
ATOM   3191  HN  LEU   346      13.530  15.180  14.750  1.00  0.00
ATOM   3192  CA  LEU   346      14.650  15.400  12.980  1.00  0.00
ATOM   3193  CB  LEU   346      14.310  13.930  12.670  1.00  0.00
ATOM   3194  CG  LEU   346      14.870  13.440  11.330  1.00  0.00
ATOM   3195  CD2 LEU   346      14.100  12.210  10.820  1.00  0.00
ATOM   3196  CD1 LEU   346      16.390  13.230  11.400  1.00  0.00
ATOM   3197  C   LEU   346      14.050  16.190  11.870  1.00  0.00
ATOM   3198  O   LEU   346      14.740  16.680  10.970  1.00  0.00
ATOM   3199  N   LEU   347      12.720  16.380  11.920  1.00  0.00
ATOM   3200  HN  LEU   347      12.200  16.060  12.730  1.00  0.00
ATOM   3201  CA  LEU   347      12.030  17.020  10.850  1.00  0.00
ATOM   3202  CB  LEU   347      10.540  17.190  11.170  1.00  0.00
ATOM   3203  CG  LEU   347       9.830  15.870  11.500  1.00  0.00
ATOM   3204  CD2 LEU   347      10.090  14.800  10.420  1.00  0.00
ATOM   3205  CD1 LEU   347       8.330  16.090  11.790  1.00  0.00
ATOM   3206  C   LEU   347      12.600  18.390  10.700  1.00  0.00
ATOM   3207  O   LEU   347      12.830  18.870   9.590  1.00  0.00
ATOM   3208  N   ALA   348      12.880  19.050  11.840  1.00  0.00
ATOM   3209  HN  ALA   348      12.720  18.600  12.730  1.00  0.00
ATOM   3210  CA  ALA   348      13.390  20.380  11.780  1.00  0.00
ATOM   3211  CB  ALA   348      13.670  20.980  13.170  1.00  0.00
ATOM   3212  C   ALA   348      14.700  20.340  11.050  1.00  0.00
ATOM   3213  O   ALA   348      14.970  21.220  10.230  1.00  0.00
ATOM   3214  N   THR   349      15.550  19.330  11.320  1.00  0.00
ATOM   3215  HN  THR   349      15.290  18.590  11.960  1.00  0.00
ATOM   3216  CA  THR   349      16.830  19.330  10.660  1.00  0.00
ATOM   3217  CB  THR   349      17.810  18.310  11.190  1.00  0.00
ATOM   3218  OG1 THR   349      19.110  18.620  10.720  1.00  0.00
ATOM   3219  HG1 THR   349      19.740  17.980  11.060  1.00  0.00
ATOM   3220  CG2 THR   349      17.440  16.900  10.700  1.00  0.00
ATOM   3221  C   THR   349      16.660  19.130   9.180  1.00  0.00
ATOM   3222  O   THR   349      17.230  19.880   8.390  1.00  0.00
ATOM   3223  N   VAL   350      15.820  18.170   8.760  1.00  0.00
ATOM   3224  HN  VAL   350      15.280  17.650   9.440  1.00  0.00
ATOM   3225  CA  VAL   350      15.690  17.860   7.370  1.00  0.00
ATOM   3226  CB  VAL   350      14.660  16.800   7.110  1.00  0.00
ATOM   3227  CG1 VAL   350      14.510  16.610   5.590  1.00  0.00
ATOM   3228  CG2 VAL   350      15.080  15.520   7.850  1.00  0.00
ATOM   3229  C   VAL   350      15.260  19.100   6.650  1.00  0.00
ATOM   3230  O   VAL   350      15.620  19.320   5.500  1.00  0.00
ATOM   3231  N   THR   351      14.420  19.930   7.300  1.00  0.00
ATOM   3232  HN  THR   351      14.110  19.680   8.230  1.00  0.00
ATOM   3233  CA  THR   351      13.960  21.150   6.710  1.00  0.00
ATOM   3234  CB  THR   351      12.900  21.820   7.540  1.00  0.00
ATOM   3235  OG1 THR   351      11.790  20.950   7.710  1.00  0.00
ATOM   3236  HG1 THR   351      11.120  21.390   8.250  1.00  0.00
ATOM   3237  CG2 THR   351      12.470  23.120   6.840  1.00  0.00
ATOM   3238  C   THR   351      15.070  22.140   6.550  1.00  0.00
ATOM   3239  O   THR   351      15.250  22.720   5.490  1.00  0.00
ATOM   3240  N   VAL   352      15.870  22.340   7.620  1.00  0.00
ATOM   3241  HN  VAL   352      15.750  21.780   8.450  1.00  0.00
ATOM   3242  CA  VAL   352      16.880  23.350   7.570  1.00  0.00
ATOM   3243  CB  VAL   352      17.680  23.420   8.840  1.00  0.00
ATOM   3244  CG1 VAL   352      18.770  24.500   8.680  1.00  0.00
ATOM   3245  CG2 VAL   352      16.710  23.680  10.010  1.00  0.00
ATOM   3246  C   VAL   352      17.810  23.010   6.460  1.00  0.00
ATOM   3247  O   VAL   352      18.260  23.880   5.710  1.00  0.00
ATOM   3248  N   CYS   353      18.140  21.710   6.330  1.00  0.00
ATOM   3249  HN  CYS   353      17.740  21.020   6.960  1.00  0.00
ATOM   3250  CA  CYS   353      19.050  21.310   5.310  1.00  0.00
ATOM   3251  CB  CYS   353      19.430  19.820   5.360  1.00  0.00
ATOM   3252  SG  CYS   353      20.620  19.430   4.050  1.00  0.00
ATOM   3253  C   CYS   353      18.470  21.570   3.950  1.00  0.00
ATOM   3254  O   CYS   353      19.110  22.200   3.110  1.00  0.00
ATOM   3255  N   LEU   354      17.210  21.150   3.700  1.00  0.00
ATOM   3256  HN  LEU   354      16.670  20.720   4.440  1.00  0.00
ATOM   3257  CA  LEU   354      16.640  21.290   2.390  1.00  0.00
ATOM   3258  CB  LEU   354      15.220  20.730   2.250  1.00  0.00
ATOM   3259  CG  LEU   354      15.150  19.220   1.940  1.00  0.00
ATOM   3260  CD2 LEU   354      13.690  18.770   1.790  1.00  0.00
ATOM   3261  CD1 LEU   354      15.940  18.380   2.950  1.00  0.00
ATOM   3262  C   LEU   354      16.580  22.730   1.990  1.00  0.00
ATOM   3263  O   LEU   354      16.980  23.070   0.880  1.00  0.00
ATOM   3264  N   SER   355      16.130  23.620   2.890  1.00  0.00
ATOM   3265  HN  SER   355      15.890  23.310   3.830  1.00  0.00
ATOM   3266  CA  SER   355      15.970  25.000   2.530  1.00  0.00
ATOM   3267  CB  SER   355      15.520  25.880   3.700  1.00  0.00
ATOM   3268  OG  SER   355      14.220  25.510   4.130  1.00  0.00
ATOM   3269  HG  SER   355      13.950  26.070   4.860  1.00  0.00
ATOM   3270  C   SER   355      17.300  25.520   2.060  1.00  0.00
ATOM   3271  O   SER   355      17.390  26.150   1.010  1.00  0.00
ATOM   3272  N   LEU   356      18.370  25.230   2.830  1.00  0.00
ATOM   3273  HN  LEU   356      18.240  24.650   3.650  1.00  0.00
ATOM   3274  CA  LEU   356      19.680  25.720   2.510  1.00  0.00
ATOM   3275  CB  LEU   356      20.720  25.280   3.570  1.00  0.00
ATOM   3276  CG  LEU   356      22.160  25.840   3.450  1.00  0.00
ATOM   3277  CD2 LEU   356      22.820  25.550   2.090  1.00  0.00
ATOM   3278  CD1 LEU   356      23.030  25.320   4.600  1.00  0.00
ATOM   3279  C   LEU   356      20.060  25.140   1.190  1.00  0.00
ATOM   3280  O   LEU   356      20.600  25.830   0.330  1.00  0.00
ATOM   3281  N   THR   357      19.750  23.850   0.980  1.00  0.00
ATOM   3282  HN  THR   357      19.270  23.320   1.700  1.00  0.00
ATOM   3283  CA  THR   357      20.100  23.220  -0.250  1.00  0.00
ATOM   3284  CB  THR   357      19.620  21.810  -0.340  1.00  0.00
ATOM   3285  OG1 THR   357      20.200  21.020   0.690  1.00  0.00
ATOM   3286  HG1 THR   357      19.880  20.120   0.620  1.00  0.00
ATOM   3287  CG2 THR   357      19.970  21.240  -1.730  1.00  0.00
ATOM   3288  C   THR   357      19.410  23.970  -1.350  1.00  0.00
ATOM   3289  O   THR   357      20.000  24.260  -2.390  1.00  0.00
ATOM   3290  N   ALA   358      18.130  24.300  -1.120  1.00  0.00
ATOM   3291  HN  ALA   358      17.720  24.100  -0.220  1.00  0.00
ATOM   3292  CA  ALA   358      17.330  24.940  -2.120  1.00  0.00
ATOM   3293  CB  ALA   358      15.890  25.170  -1.660  1.00  0.00
ATOM   3294  C   ALA   358      17.900  26.270  -2.490  1.00  0.00
ATOM   3295  O   ALA   358      18.070  26.580  -3.670  1.00  0.00
ATOM   3296  N   LYS   359      18.270  27.080  -1.490  1.00  0.00
ATOM   3297  HN  LYS   359      18.190  26.780  -0.530  1.00  0.00
ATOM   3298  CA  LYS   359      18.760  28.400  -1.780  1.00  0.00
ATOM   3299  CB  LYS   359      19.040  29.240  -0.520  1.00  0.00
ATOM   3300  CG  LYS   359      20.040  28.640   0.470  1.00  0.00
ATOM   3301  CD  LYS   359      21.490  28.720   0.000  1.00  0.00
ATOM   3302  CE  LYS   359      22.500  28.320   1.080  1.00  0.00
ATOM   3303  NZ  LYS   359      23.870  28.360   0.540  1.00  0.00
ATOM   3304  HZ1 LYS   359      23.950  27.720  -0.250  1.00  0.00
ATOM   3305  HZ2 LYS   359      24.080  29.310   0.220  1.00  0.00
ATOM   3306  HZ3 LYS   359      24.530  28.100   1.260  1.00  0.00
ATOM   3307  C   LYS   359      20.020  28.240  -2.580  1.00  0.00
ATOM   3308  O   LYS   359      20.360  29.090  -3.400  1.00  0.00
ATOM   3309  N   ARG   360      20.760  27.140  -2.320  1.00  0.00
ATOM   3310  HN  ARG   360      20.420  26.480  -1.640  1.00  0.00
ATOM   3311  CA  ARG   360      22.000  26.870  -2.990  1.00  0.00
ATOM   3312  CB  ARG   360      22.610  25.560  -2.470  1.00  0.00
ATOM   3313  CG  ARG   360      23.990  25.200  -3.020  1.00  0.00
ATOM   3314  CD  ARG   360      24.370  23.750  -2.690  1.00  0.00
ATOM   3315  NE  ARG   360      24.180  23.560  -1.230  1.00  0.00
ATOM   3316  HE  ARG   360      24.620  24.190  -0.570  1.00  0.00
ATOM   3317  CZ  ARG   360      23.400  22.540  -0.770  1.00  0.00
ATOM   3318  NH1 ARG   360      22.800  21.680  -1.650  1.00  0.00
ATOM   3319 HH11 ARG   360      22.930  21.810  -2.650  1.00  0.00
ATOM   3320 HH12 ARG   360      22.230  20.920  -1.310  1.00  0.00
ATOM   3321  NH2 ARG   360      23.220  22.360   0.570  1.00  0.00
ATOM   3322 HH21 ARG   360      23.660  22.990   1.230  1.00  0.00
ATOM   3323 HH22 ARG   360      22.640  21.600   0.910  1.00  0.00
ATOM   3324  C   ARG   360      21.790  26.710  -4.470  1.00  0.00
ATOM   3325  O   ARG   360      22.420  27.400  -5.270  1.00  0.00
ATOM   3326  N   LEU   361      20.840  25.840  -4.870  1.00  0.00
ATOM   3327  HN  LEU   361      20.280  25.390  -4.160  1.00  0.00
ATOM   3328  CA  LEU   361      20.590  25.530  -6.250  1.00  0.00
ATOM   3329  CB  LEU   361      19.510  24.450  -6.430  1.00  0.00
ATOM   3330  CG  LEU   361      19.930  23.070  -5.900  1.00  0.00
ATOM   3331  CD2 LEU   361      21.300  22.660  -6.460  1.00  0.00
ATOM   3332  CD1 LEU   361      18.850  22.010  -6.160  1.00  0.00
ATOM   3333  C   LEU   361      20.120  26.770  -6.930  1.00  0.00
ATOM   3334  O   LEU   361      20.320  26.950  -8.130  1.00  0.00
ATOM   3335  N   ALA   362      19.490  27.680  -6.170  1.00  0.00
ATOM   3336  HN  ALA   362      19.410  27.520  -5.180  1.00  0.00
ATOM   3337  CA  ALA   362      18.920  28.860  -6.740  1.00  0.00
ATOM   3338  CB  ALA   362      18.330  29.810  -5.680  1.00  0.00
ATOM   3339  C   ALA   362      20.000  29.620  -7.470  1.00  0.00
ATOM   3340  O   ALA   362      19.750  30.160  -8.550  1.00  0.00
ATOM   3341  N   SER   363      21.220  29.680  -6.910  1.00  0.00
ATOM   3342  HN  SER   363      21.400  29.210  -6.040  1.00  0.00
ATOM   3343  CA  SER   363      22.280  30.420  -7.560  1.00  0.00
ATOM   3344  CB  SER   363      23.560  30.490  -6.710  1.00  0.00
ATOM   3345  OG  SER   363      24.560  31.220  -7.400  1.00  0.00
ATOM   3346  HG  SER   363      25.360  31.250  -6.870  1.00  0.00
ATOM   3347  C   SER   363      22.630  29.730  -8.840  1.00  0.00
ATOM   3348  O   SER   363      23.160  30.340  -9.760  1.00  0.00
ATOM   3349  N   LYS   364      22.330  28.420  -8.910  1.00  0.00
ATOM   3350  HN  LYS   364      21.890  28.030  -8.090  1.00  0.00
ATOM   3351  CA  LYS   364      22.570  27.500  -9.990  1.00  0.00
ATOM   3352  CB  LYS   364      22.470  26.030  -9.560  1.00  0.00
ATOM   3353  CG  LYS   364      23.610  25.600  -8.640  1.00  0.00
ATOM   3354  CD  LYS   364      23.410  24.220  -8.000  1.00  0.00
ATOM   3355  CE  LYS   364      24.620  23.740  -7.190  1.00  0.00
ATOM   3356  NZ  LYS   364      24.600  24.340  -5.840  1.00  0.00
ATOM   3357  HZ1 LYS   364      24.640  25.340  -5.910  1.00  0.00
ATOM   3358  HZ2 LYS   364      23.750  24.060  -5.360  1.00  0.00
ATOM   3359  HZ3 LYS   364      25.400  24.010  -5.310  1.00  0.00
ATOM   3360  C   LYS   364      21.660  27.740 -11.150  1.00  0.00
ATOM   3361  O   LYS   364      21.820  27.120 -12.200  1.00  0.00
ATOM   3362  N   ASN   365      20.630  28.590 -10.990  1.00  0.00
ATOM   3363  HN  ASN   365      20.540  29.090 -10.120  1.00  0.00
ATOM   3364  CA  ASN   365      19.650  28.820 -12.020  1.00  0.00
ATOM   3365  CB  ASN   365      20.240  28.990 -13.430  1.00  0.00
ATOM   3366  CG  ASN   365      20.880  30.370 -13.490  1.00  0.00
ATOM   3367  OD1 ASN   365      22.030  30.520 -13.910  1.00  0.00
ATOM   3368  ND2 ASN   365      20.110  31.400 -13.070  1.00  0.00
ATOM   3369 HD22 ASN   365      19.170  31.230 -12.740  1.00  0.00
ATOM   3370 HD21 ASN   365      20.480  32.340 -13.080  1.00  0.00
ATOM   3371  C   ASN   365      18.730  27.640 -12.060  1.00  0.00
ATOM   3372  O   ASN   365      18.070  27.370 -13.060  1.00  0.00
ATOM   3373  N   CYS   366      18.670  26.930 -10.920  1.00  0.00
ATOM   3374  HN  CYS   366      19.300  27.160 -10.160  1.00  0.00
ATOM   3375  CA  CYS   366      17.760  25.840 -10.750  1.00  0.00
ATOM   3376  CB  CYS   366      18.430  24.520 -10.340  1.00  0.00
ATOM   3377  SG  CYS   366      17.220  23.190 -10.150  1.00  0.00
ATOM   3378  C   CYS   366      16.860  26.240  -9.630  1.00  0.00
ATOM   3379  O   CYS   366      17.340  26.590  -8.540  1.00  0.00
ATOM   3380  N   VAL   367      15.530  26.240  -9.850  1.00  0.00
ATOM   3381  HN  VAL   367      15.160  25.990 -10.760  1.00  0.00
ATOM   3382  CA  VAL   367      14.660  26.600  -8.780  1.00  0.00
ATOM   3383  CB  VAL   367      13.840  27.840  -9.050  1.00  0.00
ATOM   3384  CG1 VAL   367      12.950  27.600 -10.280  1.00  0.00
ATOM   3385  CG2 VAL   367      13.060  28.190  -7.780  1.00  0.00
ATOM   3386  C   VAL   367      13.750  25.450  -8.490  1.00  0.00
ATOM   3387  O   VAL   367      12.940  25.040  -9.330  1.00  0.00
ATOM   3388  N   VAL   368      13.850  24.900  -7.270  1.00  0.00
ATOM   3389  HN  VAL   368      14.540  25.250  -6.620  1.00  0.00
ATOM   3390  CA  VAL   368      13.000  23.800  -6.900  1.00  0.00
ATOM   3391  CB  VAL   368      13.700  22.750  -6.090  1.00  0.00
ATOM   3392  CG1 VAL   368      12.660  21.720  -5.620  1.00  0.00
ATOM   3393  CG2 VAL   368      14.850  22.150  -6.920  1.00  0.00
ATOM   3394  C   VAL   368      11.920  24.380  -6.050  1.00  0.00
ATOM   3395  O   VAL   368      12.190  25.050  -5.060  1.00  0.00
ATOM   3396  N   LYS   369      10.660  24.210  -6.470  1.00  0.00
ATOM   3397  HN  LYS   369      10.480  23.720  -7.340  1.00  0.00
ATOM   3398  CA  LYS   369       9.550  24.700  -5.710  1.00  0.00
ATOM   3399  CB  LYS   369       8.270  24.830  -6.560  1.00  0.00
ATOM   3400  CG  LYS   369       8.490  25.800  -7.720  1.00  0.00
ATOM   3401  CD  LYS   369       7.330  25.870  -8.710  1.00  0.00
ATOM   3402  CE  LYS   369       6.270  26.890  -8.290  1.00  0.00
ATOM   3403  NZ  LYS   369       5.330  27.140  -9.410  1.00  0.00
ATOM   3404  HZ1 LYS   369       5.850  27.500 -10.200  1.00  0.00
ATOM   3405  HZ2 LYS   369       4.880  26.270  -9.670  1.00  0.00
ATOM   3406  HZ3 LYS   369       4.630  27.810  -9.120  1.00  0.00
ATOM   3407  C   LYS   369       9.270  23.850  -4.510  1.00  0.00
ATOM   3408  O   LYS   369       9.130  24.350  -3.400  1.00  0.00
ATOM   3409  N   ASN   370       9.210  22.510  -4.710  1.00  0.00
ATOM   3410  HN  ASN   370       9.420  22.130  -5.620  1.00  0.00
ATOM   3411  CA  ASN   370       8.840  21.620  -3.640  1.00  0.00
ATOM   3412  CB  ASN   370       8.160  20.340  -4.140  1.00  0.00
ATOM   3413  CG  ASN   370       6.890  20.740  -4.890  1.00  0.00
ATOM   3414  OD1 ASN   370       6.060  21.490  -4.380  1.00  0.00
ATOM   3415  ND2 ASN   370       6.750  20.230  -6.140  1.00  0.00
ATOM   3416 HD22 ASN   370       7.460  19.620  -6.520  1.00  0.00
ATOM   3417 HD21 ASN   370       5.930  20.460  -6.690  1.00  0.00
ATOM   3418  C   ASN   370      10.090  21.210  -2.930  1.00  0.00
ATOM   3419  O   ASN   370      10.970  20.570  -3.510  1.00  0.00
ATOM   3420  N   LEU   371      10.180  21.520  -1.620  1.00  0.00
ATOM   3421  HN  LEU   371       9.380  21.920  -1.150  1.00  0.00
ATOM   3422  CA  LEU   371      11.380  21.290  -0.880  1.00  0.00
ATOM   3423  CB  LEU   371      11.310  21.740   0.590  1.00  0.00
ATOM   3424  CG  LEU   371      11.190  23.260   0.760  1.00  0.00
ATOM   3425  CD2 LEU   371      12.120  24.010  -0.200  1.00  0.00
ATOM   3426  CD1 LEU   371      11.370  23.680   2.220  1.00  0.00
ATOM   3427  C   LEU   371      11.750  19.840  -0.870  1.00  0.00
ATOM   3428  O   LEU   371      12.930  19.500  -0.990  1.00  0.00
ATOM   3429  N   GLU   372      10.760  18.950  -0.750  1.00  0.00
ATOM   3430  HN  GLU   372       9.810  19.270  -0.720  1.00  0.00
ATOM   3431  CA  GLU   372      11.040  17.540  -0.680  1.00  0.00
ATOM   3432  CB  GLU   372       9.790  16.690  -0.380  1.00  0.00
ATOM   3433  CG  GLU   372      10.140  15.220  -0.160  1.00  0.00
ATOM   3434  CD  GLU   372      10.980  15.110   1.100  1.00  0.00
ATOM   3435  OE1 GLU   372      11.180  16.150   1.770  1.00  0.00
ATOM   3436  OE2 GLU   372      11.430  13.970   1.410  1.00  0.00
ATOM   3437  C   GLU   372      11.650  17.050  -1.960  1.00  0.00
ATOM   3438  O   GLU   372      12.400  16.070  -1.960  1.00  0.00
ATOM   3439  N   ALA   373      11.350  17.720  -3.080  1.00  0.00
ATOM   3440  HN  ALA   373      10.780  18.550  -3.000  1.00  0.00
ATOM   3441  CA  ALA   373      11.780  17.310  -4.390  1.00  0.00
ATOM   3442  CB  ALA   373      11.310  18.260  -5.510  1.00  0.00
ATOM   3443  C   ALA   373      13.280  17.260  -4.460  1.00  0.00
ATOM   3444  O   ALA   373      13.830  16.450  -5.210  1.00  0.00
ATOM   3445  N   VAL   374      13.970  18.110  -3.680  1.00  0.00
ATOM   3446  HN  VAL   374      13.480  18.700  -3.040  1.00  0.00
ATOM   3447  CA  VAL   374      15.410  18.190  -3.740  1.00  0.00
ATOM   3448  CB  VAL   374      16.010  19.070  -2.680  1.00  0.00
ATOM   3449  CG1 VAL   374      15.510  20.510  -2.890  1.00  0.00
ATOM   3450  CG2 VAL   374      15.670  18.490  -1.300  1.00  0.00
ATOM   3451  C   VAL   374      15.960  16.810  -3.560  1.00  0.00
ATOM   3452  O   VAL   374      17.070  16.520  -3.980  1.00  0.00
ATOM   3453  N   GLU   375      15.230  15.950  -2.810  1.00  0.00
ATOM   3454  HN  GLU   375      14.390  16.280  -2.360  1.00  0.00
ATOM   3455  CA  GLU   375      15.620  14.570  -2.640  1.00  0.00
ATOM   3456  CB  GLU   375      14.930  13.910  -1.440  1.00  0.00
ATOM   3457  CG  GLU   375      15.450  12.510  -1.110  1.00  0.00
ATOM   3458  CD  GLU   375      14.660  11.490  -1.920  1.00  0.00
ATOM   3459  OE1 GLU   375      13.410  11.460  -1.760  1.00  0.00
ATOM   3460  OE2 GLU   375      15.290  10.720  -2.690  1.00  0.00
ATOM   3461  C   GLU   375      15.330  13.720  -3.850  1.00  0.00
ATOM   3462  O   GLU   375      16.200  13.040  -4.380  1.00  0.00
ATOM   3463  N   THR   376      14.080  13.800  -4.370  1.00  0.00
ATOM   3464  HN  THR   376      13.440  14.470  -3.980  1.00  0.00
ATOM   3465  CA  THR   376      13.640  12.960  -5.450  1.00  0.00
ATOM   3466  CB  THR   376      12.230  13.230  -5.850  1.00  0.00
ATOM   3467  OG1 THR   376      11.340  12.960  -4.780  1.00  0.00
ATOM   3468  HG1 THR   376      10.440  13.140  -5.060  1.00  0.00
ATOM   3469  CG2 THR   376      11.890  12.360  -7.060  1.00  0.00
ATOM   3470  C   THR   376      14.490  13.260  -6.630  1.00  0.00
ATOM   3471  O   THR   376      14.720  12.410  -7.490  1.00  0.00
ATOM   3472  N   LEU   377      14.950  14.510  -6.720  1.00  0.00
ATOM   3473  HN  LEU   377      14.770  15.170  -5.970  1.00  0.00
ATOM   3474  CA  LEU   377      15.670  14.930  -7.880  1.00  0.00
ATOM   3475  CB  LEU   377      16.070  16.410  -7.780  1.00  0.00
ATOM   3476  CG  LEU   377      16.460  17.040  -9.140  1.00  0.00
ATOM   3477  CD2 LEU   377      15.250  17.150 -10.060  1.00  0.00
ATOM   3478  CD1 LEU   377      17.640  16.320  -9.800  1.00  0.00
ATOM   3479  C   LEU   377      16.930  14.100  -8.010  1.00  0.00
ATOM   3480  O   LEU   377      17.180  13.500  -9.050  1.00  0.00
ATOM   3481  N   GLY   378      17.700  13.940  -6.920  1.00  0.00
ATOM   3482  HN  GLY   378      17.370  14.310  -6.030  1.00  0.00
ATOM   3483  CA  GLY   378      18.970  13.280  -6.970  1.00  0.00
ATOM   3484  C   GLY   378      18.810  11.880  -7.500  1.00  0.00
ATOM   3485  O   GLY   378      19.780  11.300  -7.990  1.00  0.00
ATOM   3486  N   SER   379      17.630  11.270  -7.310  1.00  0.00
ATOM   3487  HN  SER   379      16.890  11.770  -6.850  1.00  0.00
ATOM   3488  CA  SER   379      17.380   9.910  -7.750  1.00  0.00
ATOM   3489  CB  SER   379      16.200   9.240  -7.010  1.00  0.00
ATOM   3490  OG  SER   379      14.970   9.840  -7.380  1.00  0.00
ATOM   3491  HG  SER   379      14.250   9.410  -6.920  1.00  0.00
ATOM   3492  C   SER   379      17.090   9.810  -9.220  1.00  0.00
ATOM   3493  O   SER   379      16.860   8.710  -9.720  1.00  0.00
ATOM   3494  N   THR   380      17.100  10.940  -9.970  1.00  0.00
ATOM   3495  HN  THR   380      17.390  11.810  -9.530  1.00  0.00
ATOM   3496  CA  THR   380      16.700  10.970 -11.350  1.00  0.00
ATOM   3497  CB  THR   380      17.000  12.280 -12.040  1.00  0.00
ATOM   3498  OG1 THR   380      16.270  13.330 -11.440  1.00  0.00
ATOM   3499  HG1 THR   380      16.470  14.160 -11.890  1.00  0.00
ATOM   3500  CG2 THR   380      16.600  12.160 -13.520  1.00  0.00
ATOM   3501  C   THR   380      17.320   9.870 -12.170  1.00  0.00
ATOM   3502  O   THR   380      18.530   9.800 -12.350  1.00  0.00
ATOM   3503  N   SER   381      16.450   8.930 -12.630  1.00  0.00
ATOM   3504  HN  SER   381      15.480   8.980 -12.350  1.00  0.00
ATOM   3505  CA  SER   381      16.860   7.870 -13.500  1.00  0.00
ATOM   3506  CB  SER   381      15.840   6.730 -13.580  1.00  0.00
ATOM   3507  OG  SER   381      16.310   5.720 -14.470  1.00  0.00
ATOM   3508  HG  SER   381      15.660   5.000 -14.510  1.00  0.00
ATOM   3509  C   SER   381      17.040   8.390 -14.910  1.00  0.00
ATOM   3510  O   SER   381      18.140   8.320 -15.470  1.00  0.00
ATOM   3511  N   VAL   382      15.960   8.960 -15.500  1.00  0.00
ATOM   3512  HN  VAL   382      15.120   9.090 -14.950  1.00  0.00
ATOM   3513  CA  VAL   382      15.970   9.370 -16.880  1.00  0.00
ATOM   3514  CB  VAL   382      15.010   8.580 -17.720  1.00  0.00
ATOM   3515  CG1 VAL   382      15.070   9.070 -19.180  1.00  0.00
ATOM   3516  CG2 VAL   382      15.330   7.090 -17.550  1.00  0.00
ATOM   3517  C   VAL   382      15.550  10.810 -17.020  1.00  0.00
ATOM   3518  O   VAL   382      14.820  11.340 -16.180  1.00  0.00
ATOM   3519  N   ILE   383      16.030  11.500 -18.080  1.00  0.00
ATOM   3520  HN  ILE   383      16.660  11.030 -18.730  1.00  0.00
ATOM   3521  CA  ILE   383      15.670  12.870 -18.320  1.00  0.00
ATOM   3522  CB  ILE   383      16.800  13.830 -18.110  1.00  0.00
ATOM   3523  CG2 ILE   383      16.350  15.210 -18.620  1.00  0.00
ATOM   3524  CG1 ILE   383      17.260  13.830 -16.640  1.00  0.00
ATOM   3525  CD1 ILE   383      18.570  14.570 -16.410  1.00  0.00
ATOM   3526  C   ILE   383      15.190  13.080 -19.730  1.00  0.00
ATOM   3527  O   ILE   383      15.840  12.680 -20.690  1.00  0.00
ATOM   3528  N   CYS   384      14.020  13.730 -19.880  1.00  0.00
ATOM   3529  HN  CYS   384      13.490  14.020 -19.060  1.00  0.00
ATOM   3530  CA  CYS   384      13.500  14.040 -21.190  1.00  0.00
ATOM   3531  CB  CYS   384      12.040  13.600 -21.380  1.00  0.00
ATOM   3532  SG  CYS   384      11.840  11.800 -21.270  1.00  0.00
ATOM   3533  C   CYS   384      13.550  15.530 -21.330  1.00  0.00
ATOM   3534  O   CYS   384      12.840  16.250 -20.630  1.00  0.00
ATOM   3535  N   SER   385      14.370  16.040 -22.270  1.00  0.00
ATOM   3536  HN  SER   385      14.890  15.420 -22.880  1.00  0.00
ATOM   3537  CA  SER   385      14.510  17.460 -22.410  1.00  0.00
ATOM   3538  CB  SER   385      15.930  17.960 -22.120  1.00  0.00
ATOM   3539  OG  SER   385      15.990  19.370 -22.270  1.00  0.00
ATOM   3540  HG  SER   385      16.890  19.680 -22.090  1.00  0.00
ATOM   3541  C   SER   385      14.170  17.870 -23.810  1.00  0.00
ATOM   3542  O   SER   385      14.310  17.090 -24.750  1.00  0.00
ATOM   3543  N   ASP   386      13.690  19.120 -23.960  1.00  0.00
ATOM   3544  HN  ASP   386      13.610  19.710 -23.150  1.00  0.00
ATOM   3545  CA  ASP   386      13.290  19.640 -25.240  1.00  0.00
ATOM   3546  CB  ASP   386      12.200  20.720 -25.140  1.00  0.00
ATOM   3547  CG  ASP   386      10.890  20.040 -24.750  1.00  0.00
ATOM   3548  OD1 ASP   386      10.720  18.830 -25.070  1.00  0.00
ATOM   3549  OD2 ASP   386      10.040  20.720 -24.110  1.00  0.00
ATOM   3550  C   ASP   386      14.480  20.250 -25.900  1.00  0.00
ATOM   3551  O   ASP   386      15.290  20.920 -25.260  1.00  0.00
ATOM   3552  N   LYS   387      14.620  20.000 -27.210  1.00  0.00
ATOM   3553  HN  LYS   387      13.930  19.450 -27.700  1.00  0.00
ATOM   3554  CA  LYS   387      15.760  20.500 -27.930  1.00  0.00
ATOM   3555  CB  LYS   387      15.790  20.030 -29.380  1.00  0.00
ATOM   3556  CG  LYS   387      16.990  20.560 -30.160  1.00  0.00
ATOM   3557  CD  LYS   387      17.080  20.040 -31.580  1.00  0.00
ATOM   3558  CE  LYS   387      18.190  20.710 -32.400  1.00  0.00
ATOM   3559  NZ  LYS   387      17.910  22.160 -32.510  1.00  0.00
ATOM   3560  HZ1 LYS   387      17.020  22.300 -32.980  1.00  0.00
ATOM   3561  HZ2 LYS   387      17.870  22.580 -31.590  1.00  0.00
ATOM   3562  HZ3 LYS   387      18.640  22.610 -33.050  1.00  0.00
ATOM   3563  C   LYS   387      15.790  22.000 -27.990  1.00  0.00
ATOM   3564  O   LYS   387      16.660  22.630 -27.410  1.00  0.00
ATOM   3565  N   THR   388      14.770  22.610 -28.630  1.00  0.00
ATOM   3566  HN  THR   388      13.960  22.080 -28.920  1.00  0.00
ATOM   3567  CA  THR   388      14.850  24.020 -28.900  1.00  0.00
ATOM   3568  CB  THR   388      13.750  24.520 -29.790  1.00  0.00
ATOM   3569  OG1 THR   388      13.780  23.840 -31.030  1.00  0.00
ATOM   3570  HG1 THR   388      13.070  24.170 -31.590  1.00  0.00
ATOM   3571  CG2 THR   388      13.960  26.030 -30.010  1.00  0.00
ATOM   3572  C   THR   388      14.770  24.790 -27.630  1.00  0.00
ATOM   3573  O   THR   388      13.740  24.810 -26.960  1.00  0.00
ATOM   3574  N   GLY   389      15.890  25.460 -27.270  1.00  0.00
ATOM   3575  HN  GLY   389      16.730  25.330 -27.810  1.00  0.00
ATOM   3576  CA  GLY   389      15.910  26.350 -26.150  1.00  0.00
ATOM   3577  C   GLY   389      16.560  25.720 -24.960  1.00  0.00
ATOM   3578  O   GLY   389      17.150  26.440 -24.140  1.00  0.00
ATOM   3579  N   THR   390      16.350  24.420 -24.710  1.00  0.00
ATOM   3580  HN  THR   390      15.710  23.870 -25.270  1.00  0.00
ATOM   3581  CA  THR   390      17.080  23.830 -23.610  1.00  0.00
ATOM   3582  CB  THR   390      16.340  22.680 -23.000  1.00  0.00
ATOM   3583  OG1 THR   390      15.050  23.100 -22.580  1.00  0.00
ATOM   3584  HG1 THR   390      14.580  22.360 -22.190  1.00  0.00
ATOM   3585  CG2 THR   390      17.140  22.170 -21.790  1.00  0.00
ATOM   3586  C   THR   390      18.420  23.320 -24.050  1.00  0.00
ATOM   3587  O   THR   390      19.480  23.780 -23.610  1.00  0.00
ATOM   3588  N   LEU   391      18.390  22.360 -25.000  1.00  0.00
ATOM   3589  HN  LEU   391      17.490  22.080 -25.370  1.00  0.00
ATOM   3590  CA  LEU   391      19.560  21.710 -25.500  1.00  0.00
ATOM   3591  CB  LEU   391      19.260  20.450 -26.330  1.00  0.00
ATOM   3592  CG  LEU   391      18.840  19.240 -25.470  1.00  0.00
ATOM   3593  CD2 LEU   391      18.730  17.960 -26.320  1.00  0.00
ATOM   3594  CD1 LEU   391      17.570  19.520 -24.660  1.00  0.00
ATOM   3595  C   LEU   391      20.340  22.670 -26.330  1.00  0.00
ATOM   3596  O   LEU   391      21.570  22.630 -26.350  1.00  0.00
ATOM   3597  N   THR   392      19.620  23.550 -27.050  1.00  0.00
ATOM   3598  HN  THR   392      18.610  23.550 -26.980  1.00  0.00
ATOM   3599  CA  THR   392      20.260  24.510 -27.920  1.00  0.00
ATOM   3600  CB  THR   392      19.780  24.420 -29.340  1.00  0.00
ATOM   3601  OG1 THR   392      18.400  24.750 -29.410  1.00  0.00
ATOM   3602  HG1 THR   392      18.100  24.700 -30.320  1.00  0.00
ATOM   3603  CG2 THR   392      20.010  22.990 -29.860  1.00  0.00
ATOM   3604  C   THR   392      19.940  25.890 -27.430  1.00  0.00
ATOM   3605  O   THR   392      19.060  26.090 -26.600  1.00  0.00
ATOM   3606  N   GLN   393      20.740  26.860 -27.910  1.00  0.00
ATOM   3607  HN  GLN   393      21.460  26.580 -28.550  1.00  0.00
ATOM   3608  CA  GLN   393      20.680  28.270 -27.600  1.00  0.00
ATOM   3609  CB  GLN   393      21.950  28.990 -28.090  1.00  0.00
ATOM   3610  CG  GLN   393      23.220  28.450 -27.420  1.00  0.00
ATOM   3611  CD  GLN   393      24.430  29.100 -28.070  1.00  0.00
ATOM   3612  OE1 GLN   393      24.490  30.310 -28.260  1.00  0.00
ATOM   3613  NE2 GLN   393      25.440  28.260 -28.420  1.00  0.00
ATOM   3614 HE22 GLN   393      25.360  27.260 -28.240  1.00  0.00
ATOM   3615 HE21 GLN   393      26.280  28.620 -28.850  1.00  0.00
ATOM   3616  C   GLN   393      19.490  28.910 -28.250  1.00  0.00
ATOM   3617  O   GLN   393      18.930  29.870 -27.720  1.00  0.00
ATOM   3618  N   ASN   394      19.070  28.380 -29.410  1.00  0.00
ATOM   3619  HN  ASN   394      19.540  27.560 -29.770  1.00  0.00
ATOM   3620  CA  ASN   394      18.000  28.950 -30.160  1.00  0.00
ATOM   3621  CB  ASN   394      16.680  29.080 -29.370  1.00  0.00
ATOM   3622  CG  ASN   394      15.590  29.350 -30.400  1.00  0.00
ATOM   3623  OD1 ASN   394      15.860  29.510 -31.580  1.00  0.00
ATOM   3624  ND2 ASN   394      14.320  29.400 -29.930  1.00  0.00
ATOM   3625 HD22 ASN   394      14.130  29.260 -28.950  1.00  0.00
ATOM   3626 HD21 ASN   394      13.550  29.570 -30.570  1.00  0.00
ATOM   3627  C   ASN   394      18.380  30.310 -30.660  1.00  0.00
ATOM   3628  O   ASN   394      17.570  31.240 -30.630  1.00  0.00
ATOM   3629  N   ARG   395      19.640  30.470 -31.120  1.00  0.00
ATOM   3630  HN  ARG   395      20.300  29.710 -31.020  1.00  0.00
ATOM   3631  CA  ARG   395      20.090  31.700 -31.740  1.00  0.00
ATOM   3632  CB  ARG   395      21.450  32.150 -31.190  1.00  0.00
ATOM   3633  CG  ARG   395      21.430  32.350 -29.670  1.00  0.00
ATOM   3634  CD  ARG   395      22.830  32.480 -29.050  1.00  0.00
ATOM   3635  NE  ARG   395      23.180  33.920 -28.990  1.00  0.00
ATOM   3636  HE  ARG   395      22.950  34.540 -29.750  1.00  0.00
ATOM   3637  CZ  ARG   395      23.830  34.410 -27.890  1.00  0.00
ATOM   3638  NH1 ARG   395      24.120  33.580 -26.850  1.00  0.00
ATOM   3639 HH11 ARG   395      23.870  32.600 -26.890  1.00  0.00
ATOM   3640 HH12 ARG   395      24.600  33.940 -26.030  1.00  0.00
ATOM   3641  NH2 ARG   395      24.170  35.730 -27.820  1.00  0.00
ATOM   3642 HH21 ARG   395      23.950  36.350 -28.590  1.00  0.00
ATOM   3643 HH22 ARG   395      24.650  36.090 -27.000  1.00  0.00
ATOM   3644  C   ARG   395      20.270  31.350 -33.180  1.00  0.00
ATOM   3645  O   ARG   395      21.380  31.130 -33.650  1.00  0.00
ATOM   3646  N   MET   396      19.160  31.360 -33.940  1.00  0.00
ATOM   3647  HN  MET   396      18.310  31.730 -33.550  1.00  0.00
ATOM   3648  CA  MET   396      19.140  30.860 -35.280  1.00  0.00
ATOM   3649  CB  MET   396      17.730  30.880 -35.880  1.00  0.00
ATOM   3650  CG  MET   396      17.480  29.790 -36.920  1.00  0.00
ATOM   3651  SD  MET   396      17.500  28.130 -36.190  1.00  0.00
ATOM   3652  CE  MET   396      16.240  28.480 -34.930  1.00  0.00
ATOM   3653  C   MET   396      20.040  31.690 -36.140  1.00  0.00
ATOM   3654  O   MET   396      20.160  32.900 -35.940  1.00  0.00
ATOM   3655  N   THR   397      20.740  31.040 -37.090  1.00  0.00
ATOM   3656  HN  THR   397      20.690  30.030 -37.140  1.00  0.00
ATOM   3657  CA  THR   397      21.560  31.750 -38.030  1.00  0.00
ATOM   3658  CB  THR   397      22.950  32.070 -37.540  1.00  0.00
ATOM   3659  OG1 THR   397      23.610  30.890 -37.100  1.00  0.00
ATOM   3660  HG1 THR   397      24.490  31.110 -36.790  1.00  0.00
ATOM   3661  CG2 THR   397      22.850  33.090 -36.400  1.00  0.00
ATOM   3662  C   THR   397      21.680  30.960 -39.290  1.00  0.00
ATOM   3663  O   THR   397      21.800  29.740 -39.260  1.00  0.00
ATOM   3664  N   VAL   398      21.680  31.660 -40.440  1.00  0.00
ATOM   3665  HN  VAL   398      21.590  32.670 -40.410  1.00  0.00
ATOM   3666  CA  VAL   398      21.800  31.010 -41.700  1.00  0.00
ATOM   3667  CB  VAL   398      21.070  31.710 -42.810  1.00  0.00
ATOM   3668  CG1 VAL   398      21.430  31.030 -44.140  1.00  0.00
ATOM   3669  CG2 VAL   398      19.570  31.720 -42.500  1.00  0.00
ATOM   3670  C   VAL   398      23.260  31.040 -42.060  1.00  0.00
ATOM   3671  O   VAL   398      23.780  32.090 -42.450  1.00  0.00
ATOM   3672  N   SER   399      23.960  29.910 -41.870  1.00  0.00
ATOM   3673  HN  SER   399      23.480  29.100 -41.500  1.00  0.00
ATOM   3674  CA  SER   399      25.360  29.800 -42.160  1.00  0.00
ATOM   3675  CB  SER   399      26.040  28.680 -41.350  1.00  0.00
ATOM   3676  OG  SER   399      27.420  28.610 -41.680  1.00  0.00
ATOM   3677  HG  SER   399      27.840  27.910 -41.170  1.00  0.00
ATOM   3678  C   SER   399      25.590  29.500 -43.600  1.00  0.00
ATOM   3679  O   SER   399      26.450  30.110 -44.250  1.00  0.00
ATOM   3680  N   HIS   400      24.820  28.550 -44.140  1.00  0.00
ATOM   3681  HN  HIS   400      24.060  28.150 -43.610  1.00  0.00
ATOM   3682  CA  HIS   400      25.080  28.130 -45.480  1.00  0.00
ATOM   3683  ND1 HIS   400      27.930  26.590 -45.180  1.00  0.00
ATOM   3684  CG  HIS   400      26.640  26.280 -44.790  1.00  0.00
ATOM   3685  CB  HIS   400      25.420  26.640 -45.580  1.00  0.00
ATOM   3686  NE2 HIS   400      28.090  25.540 -43.230  1.00  0.00
ATOM   3687  HE2 HIS   400      28.470  25.110 -42.400  1.00  0.00
ATOM   3688  CD2 HIS   400      26.760  25.640 -43.600  1.00  0.00
ATOM   3689  CE1 HIS   400      28.750  26.120 -44.210  1.00  0.00
ATOM   3690  C   HIS   400      23.870  28.380 -46.290  1.00  0.00
ATOM   3691  O   HIS   400      22.770  28.560 -45.770  1.00  0.00
ATOM   3692  N   LEU   401      24.070  28.470 -47.600  1.00  0.00
ATOM   3693  HN  LEU   401      25.010  28.450 -47.970  1.00  0.00
ATOM   3694  CA  LEU   401      22.970  28.610 -48.500  1.00  0.00
ATOM   3695  CB  LEU   401      22.330  30.010 -48.510  1.00  0.00
ATOM   3696  CG  LEU   401      23.190  31.170 -49.060  1.00  0.00
ATOM   3697  CD2 LEU   401      22.700  32.530 -48.530  1.00  0.00
ATOM   3698  CD1 LEU   401      23.300  31.140 -50.590  1.00  0.00
ATOM   3699  C   LEU   401      23.550  28.310 -49.820  1.00  0.00
ATOM   3700  O   LEU   401      24.640  28.790 -50.150  1.00  0.00
ATOM   3701  N   TRP   402      22.890  27.470 -50.620  1.00  0.00
ATOM   3702  HN  TRP   402      22.010  27.040 -50.360  1.00  0.00
ATOM   3703  CA  TRP   402      23.520  27.220 -51.860  1.00  0.00
ATOM   3704  CB  TRP   402      24.040  25.770 -52.010  1.00  0.00
ATOM   3705  CG  TRP   402      23.000  24.700 -51.810  1.00  0.00
ATOM   3706  CD2 TRP   402      22.240  24.160 -52.890  1.00  0.00
ATOM   3707  CD1 TRP   402      22.580  24.060 -50.680  1.00  0.00
ATOM   3708  NE1 TRP   402      21.610  23.140 -50.990  1.00  0.00
ATOM   3709  HE1 TRP   402      21.130  22.540 -50.340  1.00  0.00
ATOM   3710  CE2 TRP   402      21.390  23.190 -52.350  1.00  0.00
ATOM   3711  CE3 TRP   402      22.260  24.440 -54.220  1.00  0.00
ATOM   3712  CZ2 TRP   402      20.530  22.490 -53.150  1.00  0.00
ATOM   3713  CZ3 TRP   402      21.400  23.730 -55.020  1.00  0.00
ATOM   3714  CH2 TRP   402      20.550  22.780 -54.500  1.00  0.00
ATOM   3715  C   TRP   402      22.540  27.550 -52.920  1.00  0.00
ATOM   3716  O   TRP   402      21.380  27.170 -52.870  1.00  0.00
ATOM   3717  N   PHE   403      23.040  28.320 -53.910  1.00  0.00
ATOM   3718  HN  PHE   403      24.010  28.590 -53.870  1.00  0.00
ATOM   3719  CA  PHE   403      22.250  28.760 -55.010  1.00  0.00
ATOM   3720  CB  PHE   403      22.420  30.270 -55.250  1.00  0.00
ATOM   3721  CG  PHE   403      21.290  30.890 -56.010  1.00  0.00
ATOM   3722  CD1 PHE   403      21.020  30.590 -57.330  1.00  0.00
ATOM   3723  CD2 PHE   403      20.460  31.790 -55.390  1.00  0.00
ATOM   3724  CE1 PHE   403      19.990  31.180 -58.010  1.00  0.00
ATOM   3725  CE2 PHE   403      19.430  32.390 -56.080  1.00  0.00
ATOM   3726  CZ  PHE   403      19.180  32.090 -57.390  1.00  0.00
ATOM   3727  C   PHE   403      22.910  28.080 -56.170  1.00  0.00
ATOM   3728  O   PHE   403      23.960  27.460 -56.020  1.00  0.00
ATOM   3729  N   ASP   404      22.270  28.110 -57.340  1.00  0.00
ATOM   3730  HN  ASP   404      21.360  28.560 -57.390  1.00  0.00
ATOM   3731  CA  ASP   404      22.810  27.530 -58.530  1.00  0.00
ATOM   3732  CB  ASP   404      21.790  27.480 -59.690  1.00  0.00
ATOM   3733  CG  ASP   404      20.560  26.680 -59.290  1.00  0.00
ATOM   3734  OD1 ASP   404      20.170  26.740 -58.090  1.00  0.00
ATOM   3735  OD2 ASP   404      19.990  25.990 -60.180  1.00  0.00
ATOM   3736  C   ASP   404      23.910  28.420 -59.030  1.00  0.00
ATOM   3737  O   ASP   404      23.760  29.640 -59.040  1.00  0.00
ATOM   3738  N   ASN   405      25.080  27.830 -59.360  1.00  0.00
ATOM   3739  HN  ASN   405      25.210  26.850 -59.150  1.00  0.00
ATOM   3740  CA  ASN   405      26.150  28.550 -59.990  1.00  0.00
ATOM   3741  CB  ASN   405      27.530  27.900 -59.760  1.00  0.00
ATOM   3742  CG  ASN   405      28.630  28.850 -60.220  1.00  0.00
ATOM   3743  OD1 ASN   405      28.360  29.930 -60.740  1.00  0.00
ATOM   3744  ND2 ASN   405      29.910  28.420 -60.040  1.00  0.00
ATOM   3745 HD22 ASN   405      30.090  27.530 -59.610  1.00  0.00
ATOM   3746 HD21 ASN   405      30.680  29.010 -60.330  1.00  0.00
ATOM   3747  C   ASN   405      25.900  28.650 -61.480  1.00  0.00
ATOM   3748  O   ASN   405      25.950  29.740 -62.040  1.00  0.00
ATOM   3749  N   HIS   406      25.610  27.490 -62.140  1.00  0.00
ATOM   3750  HN  HIS   406      25.580  26.620 -61.630  1.00  0.00
ATOM   3751  CA  HIS   406      25.350  27.470 -63.570  1.00  0.00
ATOM   3752  ND1 HIS   406      27.560  25.640 -65.240  1.00  0.00
ATOM   3753  CG  HIS   406      27.640  26.790 -64.470  1.00  0.00
ATOM   3754  CB  HIS   406      26.570  27.840 -64.440  1.00  0.00
ATOM   3755  NE2 HIS   406      29.510  25.560 -64.180  1.00  0.00
ATOM   3756  HE2 HIS   406      30.420  25.260 -63.860  1.00  0.00
ATOM   3757  CD2 HIS   406      28.840  26.720 -63.830  1.00  0.00
ATOM   3758  CE1 HIS   406      28.700  24.950 -65.020  1.00  0.00
ATOM   3759  C   HIS   406      24.900  26.090 -63.980  1.00  0.00
ATOM   3760  O   HIS   406      25.200  25.100 -63.310  1.00  0.00
ATOM   3761  N   ILE   407      24.170  25.980 -65.110  1.00  0.00
ATOM   3762  HN  ILE   407      23.970  26.810 -65.650  1.00  0.00
ATOM   3763  CA  ILE   407      23.660  24.700 -65.550  1.00  0.00
ATOM   3764  CB  ILE   407      22.170  24.570 -65.450  1.00  0.00
ATOM   3765  CG2 ILE   407      21.530  25.580 -66.420  1.00  0.00
ATOM   3766  CG1 ILE   407      21.750  23.110 -65.690  1.00  0.00
ATOM   3767  CD1 ILE   407      20.310  22.820 -65.290  1.00  0.00
ATOM   3768  C   ILE   407      24.010  24.490 -67.000  1.00  0.00
ATOM   3769  O   ILE   407      24.090  25.440 -67.770  1.00  0.00
ATOM   3770  N   HIS   408      24.210  23.210 -67.380  1.00  0.00
ATOM   3771  HN  HIS   408      24.140  22.490 -66.680  1.00  0.00
ATOM   3772  CA  HIS   408      24.530  22.830 -68.730  1.00  0.00
ATOM   3773  ND1 HIS   408      27.190  24.690 -67.930  1.00  0.00
ATOM   3774  CG  HIS   408      26.770  24.010 -69.050  1.00  0.00
ATOM   3775  CB  HIS   408      26.040  22.700 -69.010  1.00  0.00
ATOM   3776  NE2 HIS   408      27.830  25.900 -69.680  1.00  0.00
ATOM   3777  HE2 HIS   408      28.230  26.630 -70.250  1.00  0.00
ATOM   3778  CD2 HIS   408      27.160  24.760 -70.110  1.00  0.00
ATOM   3779  CE1 HIS   408      27.820  25.810 -68.360  1.00  0.00
ATOM   3780  C   HIS   408      23.970  21.460 -68.940  1.00  0.00
ATOM   3781  O   HIS   408      23.190  20.960 -68.140  1.00  0.00
ATOM   3782  N   SER   409      24.350  20.820 -70.070  1.00  0.00
ATOM   3783  HN  SER   409      24.990  21.260 -70.720  1.00  0.00
ATOM   3784  CA  SER   409      23.840  19.510 -70.330  1.00  0.00
ATOM   3785  CB  SER   409      24.290  18.940 -71.690  1.00  0.00
ATOM   3786  OG  SER   409      23.740  17.640 -71.880  1.00  0.00
ATOM   3787  HG  SER   409      24.030  17.300 -72.730  1.00  0.00
ATOM   3788  C   SER   409      24.370  18.610 -69.260  1.00  0.00
ATOM   3789  O   SER   409      25.490  18.110 -69.340  1.00  0.00
ATOM   3790  N   ALA   410      23.530  18.360 -68.230  1.00  0.00
ATOM   3791  HN  ALA   410      22.630  18.810 -68.240  1.00  0.00
ATOM   3792  CA  ALA   410      23.850  17.500 -67.130  1.00  0.00
ATOM   3793  CB  ALA   410      24.220  16.080 -67.580  1.00  0.00
ATOM   3794  C   ALA   410      25.020  18.070 -66.380  1.00  0.00
ATOM   3795  O   ALA   410      25.520  17.440 -65.450  1.00  0.00
ATOM   3796  N   ASP   411      25.440  19.290 -66.730  1.00  0.00
ATOM   3797  HN  ASP   411      24.950  19.810 -67.450  1.00  0.00
ATOM   3798  CA  ASP   411      26.590  19.870 -66.100  1.00  0.00
ATOM   3799  CB  ASP   411      27.540  20.510 -67.120  1.00  0.00
ATOM   3800  CG  ASP   411      28.870  20.800 -66.450  1.00  0.00
ATOM   3801  OD1 ASP   411      28.920  20.750 -65.190  1.00  0.00
ATOM   3802  OD2 ASP   411      29.860  21.070 -67.190  1.00  0.00
ATOM   3803  C   ASP   411      26.090  20.950 -65.190  1.00  0.00
ATOM   3804  O   ASP   411      25.800  22.060 -65.640  1.00  0.00
ATOM   3805  N   THR   412      25.980  20.680 -63.880  1.00  0.00
ATOM   3806  HN  THR   412      26.250  19.770 -63.520  1.00  0.00
ATOM   3807  CA  THR   412      25.470  21.700 -63.010  1.00  0.00
ATOM   3808  CB  THR   412      24.180  21.320 -62.350  1.00  0.00
ATOM   3809  OG1 THR   412      24.380  20.200 -61.500  1.00  0.00
ATOM   3810  HG1 THR   412      23.550  19.970 -61.080  1.00  0.00
ATOM   3811  CG2 THR   412      23.140  21.000 -63.430  1.00  0.00
ATOM   3812  C   THR   412      26.460  21.930 -61.920  1.00  0.00
ATOM   3813  O   THR   412      27.190  21.020 -61.520  1.00  0.00
ATOM   3814  N   THR   413      26.510  23.180 -61.440  1.00  0.00
ATOM   3815  HN  THR   413      25.920  23.880 -61.850  1.00  0.00
ATOM   3816  CA  THR   413      27.380  23.560 -60.360  1.00  0.00
ATOM   3817  CB  THR   413      28.470  24.490 -60.790  1.00  0.00
ATOM   3818  OG1 THR   413      27.920  25.660 -61.370  1.00  0.00
ATOM   3819  HG1 THR   413      28.630  26.250 -61.640  1.00  0.00
ATOM   3820  CG2 THR   413      29.360  23.770 -61.820  1.00  0.00
ATOM   3821  C   THR   413      26.510  24.280 -59.380  1.00  0.00
ATOM   3822  O   THR   413      25.500  24.870 -59.740  1.00  0.00
ATOM   3823  N   GLU   414      26.890  24.240 -58.090  1.00  0.00
ATOM   3824  HN  GLU   414      27.740  23.750 -57.830  1.00  0.00
ATOM   3825  CA  GLU   414      26.100  24.870 -57.080  1.00  0.00
ATOM   3826  CB  GLU   414      25.760  23.920 -55.910  1.00  0.00
ATOM   3827  CG  GLU   414      24.990  22.680 -56.340  1.00  0.00
ATOM   3828  CD  GLU   414      25.960  21.750 -57.050  1.00  0.00
ATOM   3829  OE1 GLU   414      26.990  21.380 -56.410  1.00  0.00
ATOM   3830  OE2 GLU   414      25.710  21.400 -58.230  1.00  0.00
ATOM   3831  C   GLU   414      26.930  25.960 -56.530  1.00  0.00
ATOM   3832  O   GLU   414      28.020  26.240 -57.020  1.00  0.00
ATOM   3833  N   ASP   415      26.410  26.680 -55.520  1.00  0.00
ATOM   3834  HN  ASP   415      25.470  26.500 -55.190  1.00  0.00
ATOM   3835  CA  ASP   415      27.220  27.700 -54.950  1.00  0.00
ATOM   3836  CB  ASP   415      26.730  29.120 -55.290  1.00  0.00
ATOM   3837  CG  ASP   415      27.900  30.070 -55.090  1.00  0.00
ATOM   3838  OD1 ASP   415      28.880  29.980 -55.880  1.00  0.00
ATOM   3839  OD2 ASP   415      27.830  30.900 -54.140  1.00  0.00
ATOM   3840  C   ASP   415      27.130  27.490 -53.480  1.00  0.00
ATOM   3841  O   ASP   415      26.270  28.070 -52.810  1.00  0.00
ATOM   3842  N   GLN   416      28.010  26.650 -52.920  1.00  0.00
ATOM   3843  HN  GLN   416      28.680  26.160 -53.510  1.00  0.00
ATOM   3844  CA  GLN   416      28.000  26.430 -51.510  1.00  0.00
ATOM   3845  CB  GLN   416      29.040  25.380 -51.070  1.00  0.00
ATOM   3846  CG  GLN   416      28.980  25.000 -49.590  1.00  0.00
ATOM   3847  CD  GLN   416      27.820  24.020 -49.410  1.00  0.00
ATOM   3848  OE1 GLN   416      26.680  24.320 -49.750  1.00  0.00
ATOM   3849  NE2 GLN   416      28.130  22.810 -48.870  1.00  0.00
ATOM   3850 HE22 GLN   416      29.080  22.600 -48.610  1.00  0.00
ATOM   3851 HE21 GLN   416      27.410  22.120 -48.730  1.00  0.00
ATOM   3852  C   GLN   416      28.400  27.740 -50.940  1.00  0.00
ATOM   3853  O   GLN   416      29.170  28.480 -51.560  1.00  0.00
ATOM   3854  N   SER   417      27.870  28.100 -49.770  1.00  0.00
ATOM   3855  HN  SER   417      27.250  27.500 -49.250  1.00  0.00
ATOM   3856  CA  SER   417      28.250  29.400 -49.300  1.00  0.00
ATOM   3857  CB  SER   417      27.220  30.500 -49.590  1.00  0.00
ATOM   3858  OG  SER   417      26.100  30.360 -48.730  1.00  0.00
ATOM   3859  HG  SER   417      25.460  31.050 -48.910  1.00  0.00
ATOM   3860  C   SER   417      28.380  29.330 -47.840  1.00  0.00
ATOM   3861  O   SER   417      28.080  28.320 -47.200  1.00  0.00
ATOM   3862  N   GLY   418      28.880  30.440 -47.290  1.00  0.00
ATOM   3863  HN  GLY   418      29.170  31.200 -47.880  1.00  0.00
ATOM   3864  CA  GLY   418      29.000  30.570 -45.890  1.00  0.00
ATOM   3865  C   GLY   418      28.740  32.000 -45.620  1.00  0.00
ATOM   3866  O   GLY   418      29.140  32.890 -46.370  1.00  0.00
ATOM   3867  N   GLN   419      28.010  32.250 -44.540  1.00  0.00
ATOM   3868  HN  GLN   419      27.610  31.490 -44.000  1.00  0.00
ATOM   3869  CA  GLN   419      27.780  33.590 -44.140  1.00  0.00
ATOM   3870  CB  GLN   419      26.290  33.950 -44.040  1.00  0.00
ATOM   3871  CG  GLN   419      25.580  33.840 -45.390  1.00  0.00
ATOM   3872  CD  GLN   419      24.080  33.920 -45.160  1.00  0.00
ATOM   3873  OE1 GLN   419      23.300  33.640 -46.070  1.00  0.00
ATOM   3874  NE2 GLN   419      23.660  34.290 -43.930  1.00  0.00
ATOM   3875 HE22 GLN   419      24.330  34.510 -43.210  1.00  0.00
ATOM   3876 HE21 GLN   419      22.670  34.350 -43.730  1.00  0.00
ATOM   3877  C   GLN   419      28.340  33.570 -42.780  1.00  0.00
ATOM   3878  O   GLN   419      28.020  32.670 -41.990  1.00  0.00
ATOM   3879  N   THR   420      29.210  34.520 -42.440  1.00  0.00
ATOM   3880  HN  THR   420      29.450  35.290 -43.060  1.00  0.00
ATOM   3881  CA  THR   420      29.760  34.360 -41.150  1.00  0.00
ATOM   3882  CB  THR   420      31.250  34.620 -41.100  1.00  0.00
ATOM   3883  OG1 THR   420      31.750  34.330 -39.800  1.00  0.00
ATOM   3884  HG1 THR   420      32.700  34.500 -39.780  1.00  0.00
ATOM   3885  CG2 THR   420      31.530  36.080 -41.480  1.00  0.00
ATOM   3886  C   THR   420      29.070  35.280 -40.220  1.00  0.00
ATOM   3887  O   THR   420      29.030  36.490 -40.440  1.00  0.00
ATOM   3888  N   PHE   421      28.380  34.700 -39.220  1.00  0.00
ATOM   3889  HN  PHE   421      28.200  33.700 -39.250  1.00  0.00
ATOM   3890  CA  PHE   421      27.900  35.480 -38.140  1.00  0.00
ATOM   3891  CB  PHE   421      27.090  36.730 -38.520  1.00  0.00
ATOM   3892  CG  PHE   421      27.420  37.730 -37.460  1.00  0.00
ATOM   3893  CD1 PHE   421      28.680  38.270 -37.410  1.00  0.00
ATOM   3894  CD2 PHE   421      26.490  38.150 -36.540  1.00  0.00
ATOM   3895  CE1 PHE   421      29.030  39.190 -36.450  1.00  0.00
ATOM   3896  CE2 PHE   421      26.820  39.070 -35.570  1.00  0.00
ATOM   3897  CZ  PHE   421      28.100  39.590 -35.520  1.00  0.00
ATOM   3898  C   PHE   421      27.080  34.580 -37.280  1.00  0.00
ATOM   3899  O   PHE   421      25.990  34.150 -37.660  1.00  0.00
ATOM   3900  N   ASP   422      27.600  34.270 -36.080  1.00  0.00
ATOM   3901  HN  ASP   422      28.500  34.650 -35.820  1.00  0.00
ATOM   3902  CA  ASP   422      26.920  33.410 -35.150  1.00  0.00
ATOM   3903  CB  ASP   422      27.750  33.090 -33.900  1.00  0.00
ATOM   3904  CG  ASP   422      28.930  32.220 -34.340  1.00  0.00
ATOM   3905  OD1 ASP   422      29.260  32.260 -35.550  1.00  0.00
ATOM   3906  OD2 ASP   422      29.500  31.510 -33.460  1.00  0.00
ATOM   3907  C   ASP   422      25.730  34.170 -34.710  1.00  0.00
ATOM   3908  O   ASP   422      24.680  33.590 -34.430  1.00  0.00
ATOM   3909  N   GLN   423      25.890  35.490 -34.640  1.00  0.00
ATOM   3910  HN  GLN   423      26.780  35.900 -34.870  1.00  0.00
ATOM   3911  CA  GLN   423      24.820  36.350 -34.230  1.00  0.00
ATOM   3912  CB  GLN   423      25.290  37.590 -33.440  1.00  0.00
ATOM   3913  CG  GLN   423      25.910  37.270 -32.080  1.00  0.00
ATOM   3914  CD  GLN   423      27.340  36.810 -32.300  1.00  0.00
ATOM   3915  OE1 GLN   423      28.250  37.610 -32.500  1.00  0.00
ATOM   3916  NE2 GLN   423      27.560  35.460 -32.270  1.00  0.00
ATOM   3917 HE22 GLN   423      26.790  34.830 -32.100  1.00  0.00
ATOM   3918 HE21 GLN   423      28.490  35.100 -32.410  1.00  0.00
ATOM   3919  C   GLN   423      24.110  36.830 -35.460  1.00  0.00
ATOM   3920  O   GLN   423      24.310  36.320 -36.560  1.00  0.00
ATOM   3921  N   SER   424      23.220  37.830 -35.280  1.00  0.00
ATOM   3922  HN  SER   424      23.160  38.220 -34.350  1.00  0.00
ATOM   3923  CA  SER   424      22.360  38.420 -36.270  1.00  0.00
ATOM   3924  CB  SER   424      21.160  39.150 -35.640  1.00  0.00
ATOM   3925  OG  SER   424      20.360  38.230 -34.910  1.00  0.00
ATOM   3926  HG  SER   424      19.610  38.700 -34.520  1.00  0.00
ATOM   3927  C   SER   424      22.970  39.410 -37.300  1.00  0.00
ATOM   3928  O   SER   424      22.200  39.810 -38.170  1.00  0.00
ATOM   3929  N   SER   425      24.250  39.910 -37.260  1.00  0.00
ATOM   3930  HN  SER   425      24.860  39.630 -36.510  1.00  0.00
ATOM   3931  CA  SER   425      24.770  40.870 -38.290  1.00  0.00
ATOM   3932  CB  SER   425      26.030  41.630 -37.850  1.00  0.00
ATOM   3933  OG  SER   425      27.150  40.760 -37.860  1.00  0.00
ATOM   3934  HG  SER   425      27.940  41.230 -37.590  1.00  0.00
ATOM   3935  C   SER   425      25.150  40.100 -39.660  1.00  0.00
ATOM   3936  O   SER   425      25.290  38.890 -39.510  1.00  0.00
ATOM   3937  N   GLU   426      25.390  40.670 -40.980  1.00  0.00
ATOM   3938  HN  GLU   426      25.530  41.660 -41.060  1.00  0.00
ATOM   3939  CA  GLU   426      25.440  39.780 -42.300  1.00  0.00
ATOM   3940  CB  GLU   426      23.980  39.380 -42.580  1.00  0.00
ATOM   3941  CG  GLU   426      23.380  38.550 -41.430  1.00  0.00
ATOM   3942  CD  GLU   426      24.060  37.200 -41.350  1.00  0.00
ATOM   3943  OE1 GLU   426      25.320  37.160 -41.360  1.00  0.00
ATOM   3944  OE2 GLU   426      23.330  36.180 -41.260  1.00  0.00
ATOM   3945  C   GLU   426      26.160  39.950 -43.950  1.00  0.00
ATOM   3946  O   GLU   426      26.870  40.950 -44.040  1.00  0.00
ATOM   3947  N   THR   427      26.110  38.990 -45.210  1.00  0.00
ATOM   3948  HN  THR   427      25.800  38.090 -44.890  1.00  0.00
ATOM   3949  CA  THR   427      26.370  38.890 -46.900  1.00  0.00
ATOM   3950  CB  THR   427      27.810  39.150 -47.210  1.00  0.00
ATOM   3951  OG1 THR   427      28.640  38.130 -46.660  1.00  0.00
ATOM   3952  HG1 THR   427      29.550  38.320 -46.870  1.00  0.00
ATOM   3953  CG2 THR   427      28.190  40.520 -46.600  1.00  0.00
ATOM   3954  C   THR   427      25.880  37.680 -48.150  1.00  0.00
ATOM   3955  O   THR   427      25.460  36.610 -47.710  1.00  0.00
ATOM   3956  N   TRP   428      25.860  37.750 -49.700  1.00  0.00
ATOM   3957  HN  TRP   428      26.030  38.690 -50.010  1.00  0.00
ATOM   3958  CA  TRP   428      25.650  36.740 -50.980  1.00  0.00
ATOM   3959  CB  TRP   428      24.900  35.450 -50.620  1.00  0.00
ATOM   3960  CG  TRP   428      25.790  34.580 -49.760  1.00  0.00
ATOM   3961  CD2 TRP   428      27.160  34.300 -50.110  1.00  0.00
ATOM   3962  CD1 TRP   428      25.580  34.000 -48.550  1.00  0.00
ATOM   3963  NE1 TRP   428      26.730  33.380 -48.110  1.00  0.00
ATOM   3964  HE1 TRP   428      26.830  32.880 -47.250  1.00  0.00
ATOM   3965  CE2 TRP   428      27.710  33.560 -49.070  1.00  0.00
ATOM   3966  CE3 TRP   428      27.900  34.660 -51.200  1.00  0.00
ATOM   3967  CZ2 TRP   428      29.010  33.160 -49.100  1.00  0.00
ATOM   3968  CZ3 TRP   428      29.210  34.240 -51.240  1.00  0.00
ATOM   3969  CH2 TRP   428      29.750  33.510 -50.210  1.00  0.00
ATOM   3970  C   TRP   428      25.290  37.140 -52.580  1.00  0.00
ATOM   3971  O   TRP   428      25.310  38.300 -52.970  1.00  0.00
ATOM   3972  N   ARG   429      24.940  36.220 -53.620  1.00  0.00
ATOM   3973  HN  ARG   429      24.730  35.270 -53.340  1.00  0.00
ATOM   3974  CA  ARG   429      24.850  36.540 -55.120  1.00  0.00
ATOM   3975  CB  ARG   429      25.860  35.750 -55.970  1.00  0.00
ATOM   3976  CG  ARG   429      26.070  36.400 -57.350  1.00  0.00
ATOM   3977  CD  ARG   429      27.140  35.740 -58.220  1.00  0.00
ATOM   3978  NE  ARG   429      27.240  36.540 -59.470  1.00  0.00
ATOM   3979  HE  ARG   429      26.670  36.280 -60.270  1.00  0.00
ATOM   3980  CZ  ARG   429      28.080  37.610 -59.540  1.00  0.00
ATOM   3981  NH1 ARG   429      28.910  37.900 -58.490  1.00  0.00
ATOM   3982 HH11 ARG   429      28.890  37.330 -57.660  1.00  0.00
ATOM   3983 HH12 ARG   429      29.530  38.690 -58.550  1.00  0.00
ATOM   3984  NH2 ARG   429      28.100  38.390 -60.660  1.00  0.00
ATOM   3985 HH21 ARG   429      27.500  38.170 -61.440  1.00  0.00
ATOM   3986 HH22 ARG   429      28.730  39.180 -60.710  1.00  0.00
ATOM   3987  C   ARG   429      23.490  36.400 -55.800  1.00  0.00
ATOM   3988  O   ARG   429      22.740  37.370 -55.920  1.00  0.00
ATOM   3989  N   ALA   430      23.090  35.190 -56.300  1.00  0.00
ATOM   3990  HN  ALA   430      23.790  34.470 -56.300  1.00  0.00
ATOM   3991  CA  ALA   430      21.780  34.790 -56.810  1.00  0.00
ATOM   3992  CB  ALA   430      21.840  33.400 -57.430  1.00  0.00
ATOM   3993  C   ALA   430      20.910  34.940 -55.610  1.00  0.00
ATOM   3994  O   ALA   430      19.680  35.020 -55.620  1.00  0.00
ATOM   3995  N   LEU   431      21.600  35.000 -54.490  1.00  0.00
ATOM   3996  HN  LEU   431      22.580  34.750 -54.510  1.00  0.00
ATOM   3997  CA  LEU   431      21.020  35.400 -53.290  1.00  0.00
ATOM   3998  CB  LEU   431      22.010  35.500 -52.120  1.00  0.00
ATOM   3999  CG  LEU   431      22.500  34.120 -51.650  1.00  0.00
ATOM   4000  CD2 LEU   431      23.280  33.380 -52.750  1.00  0.00
ATOM   4001  CD1 LEU   431      21.340  33.290 -51.060  1.00  0.00
ATOM   4002  C   LEU   431      20.340  36.750 -53.460  1.00  0.00
ATOM   4003  O   LEU   431      19.660  37.180 -52.550  1.00  0.00
ATOM   4004  N   CYS   432      20.550  37.530 -54.540  1.00  0.00
ATOM   4005  HN  CYS   432      21.220  37.290 -55.250  1.00  0.00
ATOM   4006  CA  CYS   432      19.760  38.750 -54.620  1.00  0.00
ATOM   4007  CB  CYS   432      20.050  39.570 -55.890  1.00  0.00
ATOM   4008  SG  CYS   432      19.070  41.100 -55.990  1.00  0.00
ATOM   4009  C   CYS   432      18.290  38.420 -54.610  1.00  0.00
ATOM   4010  O   CYS   432      17.500  38.980 -53.850  1.00  0.00
ATOM   4011  N   ARG   433      17.850  37.500 -55.490  1.00  0.00
ATOM   4012  HN  ARG   433      18.490  37.080 -56.140  1.00  0.00
ATOM   4013  CA  ARG   433      16.460  37.120 -55.500  1.00  0.00
ATOM   4014  CB  ARG   433      16.050  36.330 -56.750  1.00  0.00
ATOM   4015  CG  ARG   433      16.150  37.160 -58.030  1.00  0.00
ATOM   4016  CD  ARG   433      15.350  36.610 -59.210  1.00  0.00
ATOM   4017  NE  ARG   433      13.920  36.990 -58.980  1.00  0.00
ATOM   4018  HE  ARG   433      13.510  36.870 -58.070  1.00  0.00
ATOM   4019  CZ  ARG   433      13.180  37.490 -60.010  1.00  0.00
ATOM   4020  NH1 ARG   433      13.730  37.650 -61.250  1.00  0.00
ATOM   4021 HH11 ARG   433      14.700  37.390 -61.400  1.00  0.00
ATOM   4022 HH12 ARG   433      13.180  38.030 -62.010  1.00  0.00
ATOM   4023  NH2 ARG   433      11.880  37.850 -59.810  1.00  0.00
ATOM   4024 HH21 ARG   433      11.460  37.730 -58.890  1.00  0.00
ATOM   4025 HH22 ARG   433      11.330  38.220 -60.560  1.00  0.00
ATOM   4026  C   ARG   433      16.160  36.290 -54.290  1.00  0.00
ATOM   4027  O   ARG   433      15.090  36.440 -53.700  1.00  0.00
ATOM   4028  N   VAL   434      17.120  35.430 -53.890  1.00  0.00
ATOM   4029  HN  VAL   434      17.990  35.370 -54.400  1.00  0.00
ATOM   4030  CA  VAL   434      16.930  34.590 -52.730  1.00  0.00
ATOM   4031  CB  VAL   434      18.160  33.840 -52.300  1.00  0.00
ATOM   4032  CG1 VAL   434      17.910  33.260 -50.890  1.00  0.00
ATOM   4033  CG2 VAL   434      18.440  32.750 -53.340  1.00  0.00
ATOM   4034  C   VAL   434      16.610  35.530 -51.630  1.00  0.00
ATOM   4035  O   VAL   434      15.830  35.230 -50.730  1.00  0.00
ATOM   4036  N   LEU   435      17.230  36.720 -51.700  1.00  0.00
ATOM   4037  HN  LEU   435      17.850  36.860 -52.490  1.00  0.00
ATOM   4038  CA  LEU   435      17.110  37.810 -50.780  1.00  0.00
ATOM   4039  CB  LEU   435      18.060  38.970 -51.160  1.00  0.00
ATOM   4040  CG  LEU   435      18.210  40.190 -50.220  1.00  0.00
ATOM   4041  CD2 LEU   435      16.890  40.800 -49.730  1.00  0.00
ATOM   4042  CD1 LEU   435      19.070  41.260 -50.910  1.00  0.00
ATOM   4043  C   LEU   435      15.710  38.340 -50.820  1.00  0.00
ATOM   4044  O   LEU   435      15.160  38.690 -49.780  1.00  0.00
ATOM   4045  N   THR   436      15.090  38.440 -52.010  1.00  0.00
ATOM   4046  HN  THR   436      15.530  38.100 -52.860  1.00  0.00
ATOM   4047  CA  THR   436      13.780  39.030 -52.040  1.00  0.00
ATOM   4048  CB  THR   436      13.170  39.130 -53.410  1.00  0.00
ATOM   4049  OG1 THR   436      12.960  37.850 -53.970  1.00  0.00
ATOM   4050  HG1 THR   436      12.570  37.940 -54.850  1.00  0.00
ATOM   4051  CG2 THR   436      14.120  39.940 -54.310  1.00  0.00
ATOM   4052  C   THR   436      12.860  38.220 -51.190  1.00  0.00
ATOM   4053  O   THR   436      12.230  38.740 -50.270  1.00  0.00
ATOM   4054  N   LEU   437      12.840  36.900 -51.410  1.00  0.00
ATOM   4055  HN  LEU   437      13.470  36.520 -52.100  1.00  0.00
ATOM   4056  CA  LEU   437      11.960  36.000 -50.720  1.00  0.00
ATOM   4057  CB  LEU   437      12.270  34.530 -51.130  1.00  0.00
ATOM   4058  CG  LEU   437      11.510  33.380 -50.420  1.00  0.00
ATOM   4059  CD2 LEU   437      11.880  33.220 -48.930  1.00  0.00
ATOM   4060  CD1 LEU   437      11.750  32.050 -51.160  1.00  0.00
ATOM   4061  C   LEU   437      12.190  36.110 -49.260  1.00  0.00
ATOM   4062  O   LEU   437      11.260  36.370 -48.500  1.00  0.00
ATOM   4063  N   CYS   438      13.450  36.010 -48.850  1.00  0.00
ATOM   4064  HN  CYS   438      14.190  35.950 -49.530  1.00  0.00
ATOM   4065  CA  CYS   438      13.790  35.980 -47.450  1.00  0.00
ATOM   4066  CB  CYS   438      15.310  36.030 -47.230  1.00  0.00
ATOM   4067  SG  CYS   438      16.180  34.600 -47.930  1.00  0.00
ATOM   4068  C   CYS   438      13.190  37.200 -46.800  1.00  0.00
ATOM   4069  O   CYS   438      12.780  37.150 -45.640  1.00  0.00
ATOM   4070  N   ASN   439      13.180  38.350 -47.520  1.00  0.00
ATOM   4071  HN  ASN   439      13.570  38.340 -48.450  1.00  0.00
ATOM   4072  CA  ASN   439      12.630  39.570 -46.990  1.00  0.00
ATOM   4073  CB  ASN   439      13.130  40.790 -47.780  1.00  0.00
ATOM   4074  CG  ASN   439      12.700  42.050 -47.040  1.00  0.00
ATOM   4075  OD1 ASN   439      12.060  41.990 -45.990  1.00  0.00
ATOM   4076  ND2 ASN   439      13.050  43.220 -47.620  1.00  0.00
ATOM   4077 HD22 ASN   439      13.560  43.230 -48.490  1.00  0.00
ATOM   4078 HD21 ASN   439      12.790  44.100 -47.190  1.00  0.00
ATOM   4079  C   ASN   439      11.130  39.620 -47.020  1.00  0.00
ATOM   4080  O   ASN   439      10.480  39.880 -46.010  1.00  0.00
ATOM   4081  N   ARG   440      10.550  39.400 -48.220  1.00  0.00
ATOM   4082  HN  ARG   440      11.130  39.110 -48.990  1.00  0.00
ATOM   4083  CA  ARG   440       9.130  39.540 -48.450  1.00  0.00
ATOM   4084  CB  ARG   440       8.800  39.500 -49.950  1.00  0.00
ATOM   4085  CG  ARG   440       9.580  40.560 -50.740  1.00  0.00
ATOM   4086  CD  ARG   440       9.290  40.580 -52.240  1.00  0.00
ATOM   4087  NE  ARG   440      10.330  41.450 -52.870  1.00  0.00
ATOM   4088  HE  ARG   440      11.120  41.030 -53.330  1.00  0.00
ATOM   4089  CZ  ARG   440      10.210  42.810 -52.830  1.00  0.00
ATOM   4090  NH1 ARG   440       9.150  43.390 -52.190  1.00  0.00
ATOM   4091 HH11 ARG   440       8.450  42.810 -51.750  1.00  0.00
ATOM   4092 HH12 ARG   440       9.060  44.390 -52.150  1.00  0.00
ATOM   4093  NH2 ARG   440      11.150  43.600 -53.420  1.00  0.00
ATOM   4094 HH21 ARG   440      11.940  43.170 -53.890  1.00  0.00
ATOM   4095 HH22 ARG   440      11.070  44.600 -53.380  1.00  0.00
ATOM   4096  C   ARG   440       8.360  38.460 -47.760  1.00  0.00
ATOM   4097  O   ARG   440       7.260  38.670 -47.270  1.00  0.00
ATOM   4098  N   ALA   441       8.920  37.240 -47.790  1.00  0.00
ATOM   4099  HN  ALA   441       9.810  37.160 -48.260  1.00  0.00
ATOM   4100  CA  ALA   441       8.380  36.030 -47.240  1.00  0.00
ATOM   4101  CB  ALA   441       9.180  34.780 -47.660  1.00  0.00
ATOM   4102  C   ALA   441       8.400  36.070 -45.740  1.00  0.00
ATOM   4103  O   ALA   441       7.610  35.390 -45.090  1.00  0.00
ATOM   4104  N   ALA   442       9.370  36.800 -45.160  1.00  0.00
ATOM   4105  HN  ALA   442      10.000  37.320 -45.740  1.00  0.00
ATOM   4106  CA  ALA   442       9.530  36.850 -43.730  1.00  0.00
ATOM   4107  CB  ALA   442      10.950  37.240 -43.300  1.00  0.00
ATOM   4108  C   ALA   442       8.580  37.820 -43.090  1.00  0.00
ATOM   4109  O   ALA   442       7.960  38.650 -43.770  1.00  0.00
ATOM   4110  N   PHE   443       8.360  37.690 -41.760  1.00  0.00
ATOM   4111  HN  PHE   443       8.750  36.900 -41.270  1.00  0.00
ATOM   4112  CA  PHE   443       7.590  38.670 -41.050  1.00  0.00
ATOM   4113  CB  PHE   443       6.160  38.210 -40.740  1.00  0.00
ATOM   4114  CG  PHE   443       5.450  38.050 -42.040  1.00  0.00
ATOM   4115  CD1 PHE   443       5.490  36.850 -42.720  1.00  0.00
ATOM   4116  CD2 PHE   443       4.770  39.110 -42.600  1.00  0.00
ATOM   4117  CE1 PHE   443       4.840  36.710 -43.920  1.00  0.00
ATOM   4118  CE2 PHE   443       4.120  38.970 -43.800  1.00  0.00
ATOM   4119  CZ  PHE   443       4.160  37.770 -44.470  1.00  0.00
ATOM   4120  C   PHE   443       8.260  38.930 -39.730  1.00  0.00
ATOM   4121  O   PHE   443       7.650  38.720 -38.680  1.00  0.00
ATOM   4122  N   LYS   444       9.510  39.460 -39.720  1.00  0.00
ATOM   4123  HN  LYS   444       9.940  39.710 -40.600  1.00  0.00
ATOM   4124  CA  LYS   444      10.230  39.670 -38.490  1.00  0.00
ATOM   4125  CB  LYS   444      11.170  38.500 -38.170  1.00  0.00
ATOM   4126  CG  LYS   444      11.930  38.730 -36.880  1.00  0.00
ATOM   4127  CD  LYS   444      12.500  37.490 -36.240  1.00  0.00
ATOM   4128  CE  LYS   444      13.090  37.730 -34.850  1.00  0.00
ATOM   4129  NZ  LYS   444      13.650  36.470 -34.300  1.00  0.00
ATOM   4130  HZ1 LYS   444      12.920  35.770 -34.240  1.00  0.00
ATOM   4131  HZ2 LYS   444      14.380  36.130 -34.910  1.00  0.00
ATOM   4132  HZ3 LYS   444      14.030  36.640 -33.380  1.00  0.00
ATOM   4133  C   LYS   444      11.090  40.900 -38.620  1.00  0.00
ATOM   4134  O   LYS   444      11.320  41.360 -39.740  1.00  0.00
ATOM   4135  N   SER   445      11.590  41.470 -37.490  1.00  0.00
ATOM   4136  HN  SER   445      11.400  41.030 -36.600  1.00  0.00
ATOM   4137  CA  SER   445      12.380  42.680 -37.510  1.00  0.00
ATOM   4138  CB  SER   445      11.690  43.900 -36.870  1.00  0.00
ATOM   4139  OG  SER   445      10.530  44.260 -37.610  1.00  0.00
ATOM   4140  HG  SER   445      10.110  45.010 -37.200  1.00  0.00
ATOM   4141  C   SER   445      13.670  42.520 -36.730  1.00  0.00
ATOM   4142  O   SER   445      13.870  41.520 -36.040  1.00  0.00
ATOM   4143  N   GLY   446      14.580  43.520 -36.830  1.00  0.00
ATOM   4144  HN  GLY   446      14.360  44.330 -37.400  1.00  0.00
ATOM   4145  CA  GLY   446      15.850  43.470 -36.150  1.00  0.00
ATOM   4146  C   GLY   446      16.080  44.760 -35.410  1.00  0.00
ATOM   4147  O   GLY   446      15.300  45.690 -35.530  1.00  0.00
ATOM   4148  N   GLN   447      17.150  44.820 -34.580  1.00  0.00
ATOM   4149  HN  GLN   447      17.720  44.000 -34.450  1.00  0.00
ATOM   4150  CA  GLN   447      17.490  46.030 -33.880  1.00  0.00
ATOM   4151  CB  GLN   447      16.490  46.410 -32.770  1.00  0.00
ATOM   4152  CG  GLN   447      16.790  47.780 -32.140  1.00  0.00
ATOM   4153  CD  GLN   447      15.600  48.170 -31.270  1.00  0.00
ATOM   4154  OE1 GLN   447      15.710  48.310 -30.060  1.00  0.00
ATOM   4155  NE2 GLN   447      14.420  48.360 -31.920  1.00  0.00
ATOM   4156 HE22 GLN   447      14.370  48.240 -32.920  1.00  0.00
ATOM   4157 HE21 GLN   447      13.600  48.620 -31.400  1.00  0.00
ATOM   4158  C   GLN   447      18.850  45.860 -33.270  1.00  0.00
ATOM   4159  O   GLN   447      19.290  44.740 -33.020  1.00  0.00
ATOM   4160  N   ASP   448      19.570  46.990 -33.020  1.00  0.00
ATOM   4161  HN  ASP   448      19.160  47.890 -33.230  1.00  0.00
ATOM   4162  CA  ASP   448      20.900  46.920 -32.470  1.00  0.00
ATOM   4163  CB  ASP   448      21.880  47.880 -33.180  1.00  0.00
ATOM   4164  CG  ASP   448      23.290  47.550 -32.730  1.00  0.00
ATOM   4165  OD1 ASP   448      23.450  46.650 -31.860  1.00  0.00
ATOM   4166  OD2 ASP   448      24.240  48.200 -33.250  1.00  0.00
ATOM   4167  C   ASP   448      20.840  47.310 -31.020  1.00  0.00
ATOM   4168  O   ASP   448      20.490  48.440 -30.680  1.00  0.00
ATOM   4169  N   ALA   449      21.200  46.370 -30.120  1.00  0.00
ATOM   4170  HN  ALA   449      21.510  45.470 -30.450  1.00  0.00
ATOM   4171  CA  ALA   449      21.160  46.630 -28.700  1.00  0.00
ATOM   4172  CB  ALA   449      21.290  45.360 -27.840  1.00  0.00
ATOM   4173  C   ALA   449      22.270  47.550 -28.300  1.00  0.00
ATOM   4174  O   ALA   449      23.420  47.360 -28.690  1.00  0.00
ATOM   4175  N   VAL   450      21.920  48.610 -27.550  1.00  0.00
ATOM   4176  HN  VAL   450      20.940  48.750 -27.320  1.00  0.00
ATOM   4177  CA  VAL   450      22.880  49.560 -27.060  1.00  0.00
ATOM   4178  CB  VAL   450      22.250  50.820 -26.550  1.00  0.00
ATOM   4179  CG1 VAL   450      23.360  51.710 -25.950  1.00  0.00
ATOM   4180  CG2 VAL   450      21.470  51.480 -27.690  1.00  0.00
ATOM   4181  C   VAL   450      23.720  49.000 -25.940  1.00  0.00
ATOM   4182  O   VAL   450      24.940  49.030 -26.030  1.00  0.00
ATOM   4183  N   PRO   451      23.120  48.460 -24.900  1.00  0.00
ATOM   4184  CA  PRO   451      23.850  48.060 -23.720  1.00  0.00
ATOM   4185  CD  PRO   451      21.690  48.520 -24.660  1.00  0.00
ATOM   4186  CB  PRO   451      22.810  47.490 -22.760  1.00  0.00
ATOM   4187  CG  PRO   451      21.510  48.210 -23.160  1.00  0.00
ATOM   4188  C   PRO   451      24.980  47.150 -24.040  1.00  0.00
ATOM   4189  O   PRO   451      26.100  47.430 -23.630  1.00  0.00
ATOM   4190  N   VAL   452      24.710  46.060 -24.770  1.00  0.00
ATOM   4191  HN  VAL   452      23.760  45.810 -25.010  1.00  0.00
ATOM   4192  CA  VAL   452      25.810  45.250 -25.200  1.00  0.00
ATOM   4193  CB  VAL   452      25.710  43.820 -24.770  1.00  0.00
ATOM   4194  CG1 VAL   452      26.900  43.050 -25.370  1.00  0.00
ATOM   4195  CG2 VAL   452      25.640  43.770 -23.240  1.00  0.00
ATOM   4196  C   VAL   452      25.660  45.250 -26.660  1.00  0.00
ATOM   4197  O   VAL   452      25.050  44.310 -27.180  1.00  0.00
ATOM   4198  N   PRO   453      26.250  46.230 -27.310  1.00  0.00
ATOM   4199  CA  PRO   453      26.090  46.480 -28.720  1.00  0.00
ATOM   4200  CD  PRO   453      27.430  46.890 -26.770  1.00  0.00
ATOM   4201  CB  PRO   453      27.200  47.450 -29.110  1.00  0.00
ATOM   4202  CG  PRO   453      27.720  48.010 -27.780  1.00  0.00
ATOM   4203  C   PRO   453      26.190  45.210 -29.480  1.00  0.00
ATOM   4204  O   PRO   453      27.280  44.770 -29.820  1.00  0.00
ATOM   4205  N   LYS   454      25.020  44.620 -29.780  1.00  0.00
ATOM   4206  HN  LYS   454      24.160  45.070 -29.500  1.00  0.00
ATOM   4207  CA  LYS   454      24.960  43.390 -30.490  1.00  0.00
ATOM   4208  CB  LYS   454      24.880  42.150 -29.580  1.00  0.00
ATOM   4209  CG  LYS   454      26.120  41.880 -28.740  1.00  0.00
ATOM   4210  CD  LYS   454      25.870  40.870 -27.620  1.00  0.00
ATOM   4211  CE  LYS   454      27.140  40.420 -26.880  1.00  0.00
ATOM   4212  NZ  LYS   454      27.890  39.450 -27.710  1.00  0.00
ATOM   4213  HZ1 LYS   454      27.300  38.640 -27.900  1.00  0.00
ATOM   4214  HZ2 LYS   454      28.150  39.880 -28.590  1.00  0.00
ATOM   4215  HZ3 LYS   454      28.720  39.150 -27.210  1.00  0.00
ATOM   4216  C   LYS   454      23.660  43.440 -31.200  1.00  0.00
ATOM   4217  O   LYS   454      22.730  44.110 -30.750  1.00  0.00
ATOM   4218  N   ARG   455      23.550  42.770 -32.350  1.00  0.00
ATOM   4219  HN  ARG   455      24.320  42.250 -32.750  1.00  0.00
ATOM   4220  CA  ARG   455      22.260  42.820 -32.980  1.00  0.00
ATOM   4221  CB  ARG   455      22.250  42.350 -34.450  1.00  0.00
ATOM   4222  CG  ARG   455      22.740  43.370 -35.470  1.00  0.00
ATOM   4223  CD  ARG   455      22.720  42.830 -36.900  1.00  0.00
ATOM   4224  NE  ARG   455      23.040  43.950 -37.830  1.00  0.00
ATOM   4225  HE  ARG   455      24.000  44.160 -38.060  1.00  0.00
ATOM   4226  CZ  ARG   455      22.020  44.700 -38.370  1.00  0.00
ATOM   4227  NH1 ARG   455      20.730  44.400 -38.060  1.00  0.00
ATOM   4228 HH11 ARG   455      20.520  43.640 -37.430  1.00  0.00
ATOM   4229 HH12 ARG   455      19.980  44.950 -38.450  1.00  0.00
ATOM   4230  NH2 ARG   455      22.300  45.730 -39.210  1.00  0.00
ATOM   4231 HH21 ARG   455      23.260  45.950 -39.440  1.00  0.00
ATOM   4232 HH22 ARG   455      21.550  46.280 -39.610  1.00  0.00
ATOM   4233  C   ARG   455      21.350  41.890 -32.230  1.00  0.00
ATOM   4234  O   ARG   455      21.740  40.780 -31.880  1.00  0.00
ATOM   4235  N   ILE   456      20.100  42.320 -31.980  1.00  0.00
ATOM   4236  HN  ILE   456      19.820  43.230 -32.320  1.00  0.00
ATOM   4237  CA  ILE   456      19.130  41.550 -31.240  1.00  0.00
ATOM   4238  CB  ILE   456      18.550  42.270 -30.060  1.00  0.00
ATOM   4239  CG2 ILE   456      17.710  43.440 -30.590  1.00  0.00
ATOM   4240  CG1 ILE   456      17.780  41.290 -29.170  1.00  0.00
ATOM   4241  CD1 ILE   456      18.680  40.280 -28.470  1.00  0.00
ATOM   4242  C   ILE   456      18.010  41.240 -32.190  1.00  0.00
ATOM   4243  O   ILE   456      17.900  41.880 -33.240  1.00  0.00
ATOM   4244  N   VAL   457      17.170  40.230 -31.890  1.00  0.00
ATOM   4245  HN  VAL   457      17.260  39.720 -31.020  1.00  0.00
ATOM   4246  CA  VAL   457      16.140  39.880 -32.830  1.00  0.00
ATOM   4247  CB  VAL   457      16.240  38.470 -33.350  1.00  0.00
ATOM   4248  CG1 VAL   457      17.570  38.310 -34.110  1.00  0.00
ATOM   4249  CG2 VAL   457      16.070  37.510 -32.160  1.00  0.00
ATOM   4250  C   VAL   457      14.770  40.040 -32.240  1.00  0.00
ATOM   4251  O   VAL   457      14.540  39.740 -31.070  1.00  0.00
ATOM   4252  N   ILE   458      13.810  40.540 -33.060  1.00  0.00
ATOM   4253  HN  ILE   458      14.060  40.840 -33.990  1.00  0.00
ATOM   4254  CA  ILE   458      12.450  40.640 -32.620  1.00  0.00
ATOM   4255  CB  ILE   458      11.950  42.060 -32.490  1.00  0.00
ATOM   4256  CG2 ILE   458      12.150  42.790 -33.830  1.00  0.00
ATOM   4257  CG1 ILE   458      10.490  42.060 -31.990  1.00  0.00
ATOM   4258  CD1 ILE   458      10.340  41.530 -30.560  1.00  0.00
ATOM   4259  C   ILE   458      11.570  39.900 -33.580  1.00  0.00
ATOM   4260  O   ILE   458      11.420  40.310 -34.730  1.00  0.00
ATOM   4261  N   GLY   459      10.960  38.780 -33.140  1.00  0.00
ATOM   4262  HN  GLY   459      11.100  38.480 -32.180  1.00  0.00
ATOM   4263  CA  GLY   459      10.120  38.010 -34.010  1.00  0.00
ATOM   4264  C   GLY   459      10.540  36.570 -33.910  1.00  0.00
ATOM   4265  O   GLY   459      11.280  36.200 -33.000  1.00  0.00
ATOM   4266  N   ASP   460      10.080  35.730 -34.860  1.00  0.00
ATOM   4267  HN  ASP   460       9.490  36.090 -35.600  1.00  0.00
ATOM   4268  CA  ASP   460      10.390  34.320 -34.860  1.00  0.00
ATOM   4269  CB  ASP   460       9.620  33.530 -35.940  1.00  0.00
ATOM   4270  CG  ASP   460       9.750  32.040 -35.670  1.00  0.00
ATOM   4271  OD1 ASP   460      10.510  31.650 -34.740  1.00  0.00
ATOM   4272  OD2 ASP   460       9.070  31.260 -36.390  1.00  0.00
ATOM   4273  C   ASP   460      11.860  34.160 -35.130  1.00  0.00
ATOM   4274  O   ASP   460      12.410  34.790 -36.020  1.00  0.00
ATOM   4275  N   ALA   461      12.540  33.280 -34.370  1.00  0.00
ATOM   4276  HN  ALA   461      12.050  32.700 -33.700  1.00  0.00
ATOM   4277  CA  ALA   461      13.960  33.160 -34.540  1.00  0.00
ATOM   4278  CB  ALA   461      14.580  32.110 -33.600  1.00  0.00
ATOM   4279  C   ALA   461      14.260  32.750 -35.950  1.00  0.00
ATOM   4280  O   ALA   461      15.080  33.370 -36.610  1.00  0.00
ATOM   4281  N   SER   462      13.540  31.740 -36.460  1.00  0.00
ATOM   4282  HN  SER   462      12.780  31.340 -35.930  1.00  0.00
ATOM   4283  CA  SER   462      13.850  31.210 -37.760  1.00  0.00
ATOM   4284  CB  SER   462      12.910  30.070 -38.190  1.00  0.00
ATOM   4285  OG  SER   462      13.070  28.960 -37.330  1.00  0.00
ATOM   4286  HG  SER   462      12.480  28.250 -37.600  1.00  0.00
ATOM   4287  C   SER   462      13.730  32.300 -38.780  1.00  0.00
ATOM   4288  O   SER   462      14.390  32.250 -39.810  1.00  0.00
ATOM   4289  N   GLU   463      12.820  33.260 -38.550  1.00  0.00
ATOM   4290  HN  GLU   463      12.250  33.220 -37.720  1.00  0.00
ATOM   4291  CA  GLU   463      12.650  34.350 -39.480  1.00  0.00
ATOM   4292  CB  GLU   463      11.280  35.040 -39.350  1.00  0.00
ATOM   4293  CG  GLU   463      10.130  34.140 -39.810  1.00  0.00
ATOM   4294  CD  GLU   463       8.870  34.980 -39.920  1.00  0.00
ATOM   4295  OE1 GLU   463       8.460  35.580 -38.890  1.00  0.00
ATOM   4296  OE2 GLU   463       8.300  35.040 -41.050  1.00  0.00
ATOM   4297  C   GLU   463      13.720  35.400 -39.380  1.00  0.00
ATOM   4298  O   GLU   463      14.260  35.820 -40.400  1.00  0.00
ATOM   4299  N   THR   464      14.110  35.820 -38.160  1.00  0.00
ATOM   4300  HN  THR   464      13.730  35.370 -37.340  1.00  0.00
ATOM   4301  CA  THR   464      15.040  36.910 -38.010  1.00  0.00
ATOM   4302  CB  THR   464      15.410  37.210 -36.580  1.00  0.00
ATOM   4303  OG1 THR   464      16.120  38.440 -36.530  1.00  0.00
ATOM   4304  HG1 THR   464      16.350  38.640 -35.620  1.00  0.00
ATOM   4305  CG2 THR   464      16.270  36.080 -35.990  1.00  0.00
ATOM   4306  C   THR   464      16.300  36.540 -38.700  1.00  0.00
ATOM   4307  O   THR   464      17.010  37.390 -39.230  1.00  0.00
ATOM   4308  N   ALA   465      16.640  35.250 -38.660  1.00  0.00
ATOM   4309  HN  ALA   465      16.050  34.580 -38.180  1.00  0.00
ATOM   4310  CA  ALA   465      17.830  34.790 -39.300  1.00  0.00
ATOM   4311  CB  ALA   465      18.060  33.280 -39.140  1.00  0.00
ATOM   4312  C   ALA   465      17.680  35.060 -40.760  1.00  0.00
ATOM   4313  O   ALA   465      18.590  35.540 -41.430  1.00  0.00
ATOM   4314  N   LEU   466      16.480  34.760 -41.280  1.00  0.00
ATOM   4315  HN  LEU   466      15.740  34.430 -40.680  1.00  0.00
ATOM   4316  CA  LEU   466      16.230  34.920 -42.680  1.00  0.00
ATOM   4317  CB  LEU   466      14.810  34.440 -43.050  1.00  0.00
ATOM   4318  CG  LEU   466      14.630  34.220 -44.550  1.00  0.00
ATOM   4319  CD2 LEU   466      13.190  33.790 -44.880  1.00  0.00
ATOM   4320  CD1 LEU   466      15.660  33.190 -45.050  1.00  0.00
ATOM   4321  C   LEU   466      16.380  36.380 -42.970  1.00  0.00
ATOM   4322  O   LEU   466      16.840  36.770 -44.050  1.00  0.00
ATOM   4323  N   LEU   467      15.980  37.250 -42.020  1.00  0.00
ATOM   4324  HN  LEU   467      15.580  36.870 -41.170  1.00  0.00
ATOM   4325  CA  LEU   467      16.090  38.670 -42.160  1.00  0.00
ATOM   4326  CB  LEU   467      15.470  39.410 -40.950  1.00  0.00
ATOM   4327  CG  LEU   467      15.410  40.950 -41.040  1.00  0.00
ATOM   4328  CD2 LEU   467      14.540  41.390 -42.220  1.00  0.00
ATOM   4329  CD1 LEU   467      16.800  41.620 -41.020  1.00  0.00
ATOM   4330  C   LEU   467      17.550  39.040 -42.210  1.00  0.00
ATOM   4331  O   LEU   467      17.980  39.780 -43.080  1.00  0.00
ATOM   4332  N   LYS   468      18.360  38.490 -41.290  1.00  0.00
ATOM   4333  HN  LYS   468      18.010  37.800 -40.630  1.00  0.00
ATOM   4334  CA  LYS   468      19.740  38.870 -41.250  1.00  0.00
ATOM   4335  CB  LYS   468      20.520  38.330 -40.040  1.00  0.00
ATOM   4336  CG  LYS   468      20.350  36.840 -39.770  1.00  0.00
ATOM   4337  CD  LYS   468      21.230  36.350 -38.620  1.00  0.00
ATOM   4338  CE  LYS   468      20.990  34.880 -38.300  1.00  0.00
ATOM   4339  NZ  LYS   468      20.820  34.160 -39.580  1.00  0.00
ATOM   4340  HZ1 LYS   468      20.030  34.540 -40.080  1.00  0.00
ATOM   4341  HZ2 LYS   468      21.660  34.260 -40.140  1.00  0.00
ATOM   4342  HZ3 LYS   468      20.660  33.170 -39.380  1.00  0.00
ATOM   4343  C   LYS   468      20.360  38.510 -42.550  1.00  0.00
ATOM   4344  O   LYS   468      21.260  39.170 -43.040  1.00  0.00
ATOM   4345  N   PHE   469      19.850  37.440 -43.170  1.00  0.00
ATOM   4346  HN  PHE   469      19.120  36.900 -42.720  1.00  0.00
ATOM   4347  CA  PHE   469      20.320  37.060 -44.460  1.00  0.00
ATOM   4348  CB  PHE   469      19.510  35.850 -44.990  1.00  0.00
ATOM   4349  CG  PHE   469      19.670  35.700 -46.470  1.00  0.00
ATOM   4350  CD1 PHE   469      18.840  36.390 -47.330  1.00  0.00
ATOM   4351  CD2 PHE   469      20.620  34.860 -47.010  1.00  0.00
ATOM   4352  CE1 PHE   469      18.960  36.270 -48.690  1.00  0.00
ATOM   4353  CE2 PHE   469      20.740  34.730 -48.380  1.00  0.00
ATOM   4354  CZ  PHE   469      19.920  35.430 -49.220  1.00  0.00
ATOM   4355  C   PHE   469      20.120  38.230 -45.410  1.00  0.00
ATOM   4356  O   PHE   469      20.950  38.490 -46.270  1.00  0.00
ATOM   4357  N   SER   470      19.010  38.980 -45.370  1.00  0.00
ATOM   4358  HN  SER   470      18.270  38.800 -44.710  1.00  0.00
ATOM   4359  CA  SER   470      18.910  40.080 -46.320  1.00  0.00
ATOM   4360  CB  SER   470      17.490  40.650 -46.410  1.00  0.00
ATOM   4361  OG  SER   470      17.120  41.220 -45.160  1.00  0.00
ATOM   4362  HG  SER   470      16.230  41.580 -45.230  1.00  0.00
ATOM   4363  C   SER   470      19.830  41.200 -45.940  1.00  0.00
ATOM   4364  O   SER   470      20.390  41.910 -46.780  1.00  0.00
ATOM   4365  N   GLU   471      20.020  41.390 -44.630  1.00  0.00
ATOM   4366  HN  GLU   471      19.590  40.760 -43.970  1.00  0.00
ATOM   4367  CA  GLU   471      20.840  42.460 -44.180  1.00  0.00
ATOM   4368  CB  GLU   471      20.950  42.510 -42.650  1.00  0.00
ATOM   4369  CG  GLU   471      21.620  43.790 -42.180  1.00  0.00
ATOM   4370  CD  GLU   471      20.900  44.900 -42.920  1.00  0.00
ATOM   4371  OE1 GLU   471      19.680  44.720 -43.180  1.00  0.00
ATOM   4372  OE2 GLU   471      21.560  45.910 -43.270  1.00  0.00
ATOM   4373  C   GLU   471      22.200  42.220 -44.740  1.00  0.00
ATOM   4374  O   GLU   471      22.980  43.150 -44.930  1.00  0.00
ATOM   4375  N   LEU   472      22.490  40.930 -44.960  1.00  0.00
ATOM   4376  HN  LEU   472      21.770  40.250 -44.740  1.00  0.00
ATOM   4377  CA  LEU   472      23.720  40.440 -45.470  1.00  0.00
ATOM   4378  CB  LEU   472      23.550  38.950 -45.980  1.00  0.00
ATOM   4379  CG  LEU   472      23.250  37.660 -45.120  1.00  0.00
ATOM   4380  CD2 LEU   472      24.380  37.040 -44.270  1.00  0.00
ATOM   4381  CD1 LEU   472      22.850  36.540 -46.090  1.00  0.00
ATOM   4382  C   LEU   472      24.000  41.030 -46.790  1.00  0.00
ATOM   4383  O   LEU   472      24.700  42.020 -47.000  1.00  0.00
ATOM   4384  N   THR   473      23.240  40.430 -47.700  1.00  0.00
ATOM   4385  HN  THR   473      22.470  39.830 -47.430  1.00  0.00
ATOM   4386  CA  THR   473      23.550  40.640 -49.060  1.00  0.00
ATOM   4387  CB  THR   473      22.670  39.840 -49.970  1.00  0.00
ATOM   4388  OG1 THR   473      21.310  40.160 -49.720  1.00  0.00
ATOM   4389  HG1 THR   473      20.750  39.640 -50.300  1.00  0.00
ATOM   4390  CG2 THR   473      22.930  38.350 -49.710  1.00  0.00
ATOM   4391  C   THR   473      23.460  42.100 -49.430  1.00  0.00
ATOM   4392  O   THR   473      24.420  42.660 -49.960  1.00  0.00
ATOM   4393  N   LEU   474      22.360  42.790 -49.040  1.00  0.00
ATOM   4394  HN  LEU   474      21.640  42.350 -48.470  1.00  0.00
ATOM   4395  CA  LEU   474      22.220  44.160 -49.470  1.00  0.00
ATOM   4396  CB  LEU   474      23.300  45.090 -48.890  1.00  0.00
ATOM   4397  CG  LEU   474      23.290  45.190 -47.350  1.00  0.00
ATOM   4398  CD2 LEU   474      21.880  45.500 -46.810  1.00  0.00
ATOM   4399  CD1 LEU   474      24.350  46.180 -46.850  1.00  0.00
ATOM   4400  C   LEU   474      22.380  44.140 -50.940  1.00  0.00
ATOM   4401  O   LEU   474      23.270  44.800 -51.490  1.00  0.00
ATOM   4402  N   GLY   475      21.500  43.380 -51.610  1.00  0.00
ATOM   4403  HN  GLY   475      20.690  43.020 -51.110  1.00  0.00
ATOM   4404  CA  GLY   475      21.650  43.040 -52.990  1.00  0.00
ATOM   4405  C   GLY   475      21.830  44.270 -53.760  1.00  0.00
ATOM   4406  O   GLY   475      22.710  44.310 -54.610  1.00  0.00
ATOM   4407  N   ASN   476      21.030  45.310 -53.460  1.00  0.00
ATOM   4408  HN  ASN   476      20.320  45.210 -52.760  1.00  0.00
ATOM   4409  CA  ASN   476      21.190  46.540 -54.160  1.00  0.00
ATOM   4410  CB  ASN   476      19.860  47.180 -54.570  1.00  0.00
ATOM   4411  CG  ASN   476      19.220  46.260 -55.610  1.00  0.00
ATOM   4412  OD1 ASN   476      19.800  46.000 -56.660  1.00  0.00
ATOM   4413  ND2 ASN   476      17.990  45.760 -55.300  1.00  0.00
ATOM   4414 HD22 ASN   476      17.550  46.000 -54.430  1.00  0.00
ATOM   4415 HD21 ASN   476      17.530  45.140 -55.950  1.00  0.00
ATOM   4416  C   ASN   476      21.860  47.450 -53.200  1.00  0.00
ATOM   4417  O   ASN   476      21.220  47.930 -52.270  1.00  0.00
ATOM   4418  N   ALA   477      23.160  47.740 -53.430  1.00  0.00
ATOM   4419  HN  ALA   477      23.590  47.420 -54.280  1.00  0.00
ATOM   4420  CA  ALA   477      23.940  48.510 -52.500  1.00  0.00
ATOM   4421  CB  ALA   477      25.320  48.910 -53.060  1.00  0.00
ATOM   4422  C   ALA   477      23.220  49.750 -52.120  1.00  0.00
ATOM   4423  O   ALA   477      23.000  50.650 -52.930  1.00  0.00
ATOM   4424  N   MET   478      22.830  49.810 -50.840  1.00  0.00
ATOM   4425  HN  MET   478      23.010  49.020 -50.230  1.00  0.00
ATOM   4426  CA  MET   478      22.170  50.950 -50.310  1.00  0.00
ATOM   4427  CB  MET   478      20.850  50.640 -49.580  1.00  0.00
ATOM   4428  CG  MET   478      19.910  51.840 -49.540  1.00  0.00
ATOM   4429  SD  MET   478      19.160  52.230 -51.150  1.00  0.00
ATOM   4430  CE  MET   478      18.640  53.920 -50.720  1.00  0.00
ATOM   4431  C   MET   478      23.150  51.440 -49.300  1.00  0.00
ATOM   4432  O   MET   478      23.650  50.650 -48.510  1.00  0.00
ATOM   4433  N   GLY   479      23.440  52.760 -49.310  1.00  0.00
ATOM   4434  HN  GLY   479      22.940  53.380 -49.930  1.00  0.00
ATOM   4435  CA  GLY   479      24.450  53.260 -48.440  1.00  0.00
ATOM   4436  C   GLY   479      24.100  52.920 -47.030  1.00  0.00
ATOM   4437  O   GLY   479      23.040  53.310 -46.530  1.00  0.00
ATOM   4438  N   TYR   480      25.000  52.160 -46.370  1.00  0.00
ATOM   4439  HN  TYR   480      25.830  51.870 -46.860  1.00  0.00
ATOM   4440  CA  TYR   480      24.810  51.750 -45.010  1.00  0.00
ATOM   4441  CB  TYR   480      24.690  50.220 -44.900  1.00  0.00
ATOM   4442  CG  TYR   480      25.840  49.650 -45.660  1.00  0.00
ATOM   4443  CD1 TYR   480      27.090  49.540 -45.090  1.00  0.00
ATOM   4444  CD2 TYR   480      25.670  49.240 -46.960  1.00  0.00
ATOM   4445  CE1 TYR   480      28.140  49.010 -45.810  1.00  0.00
ATOM   4446  CE2 TYR   480      26.710  48.710 -47.680  1.00  0.00
ATOM   4447  CZ  TYR   480      27.950  48.600 -47.100  1.00  0.00
ATOM   4448  OH  TYR   480      29.030  48.060 -47.840  1.00  0.00
ATOM   4449  HH  TYR   480      28.730  47.820 -48.720  1.00  0.00
ATOM   4450  C   TYR   480      26.030  52.170 -44.260  1.00  0.00
ATOM   4451  O   TYR   480      26.040  52.190 -43.030  1.00  0.00
ATOM   4452  N   ARG   481      27.080  52.560 -45.000  1.00  0.00
ATOM   4453  HN  ARG   481      26.990  52.560 -46.010  1.00  0.00
ATOM   4454  CA  ARG   481      28.320  52.980 -44.420  1.00  0.00
ATOM   4455  CB  ARG   481      29.380  53.350 -45.470  1.00  0.00
ATOM   4456  CG  ARG   481      29.760  52.230 -46.440  1.00  0.00
ATOM   4457  CD  ARG   481      30.960  52.580 -47.320  1.00  0.00
ATOM   4458  NE  ARG   481      31.110  51.520 -48.350  1.00  0.00
ATOM   4459  HE  ARG   481      31.670  50.700 -48.160  1.00  0.00
ATOM   4460  CZ  ARG   481      30.480  51.650 -49.560  1.00  0.00
ATOM   4461  NH1 ARG   481      29.720  52.760 -49.810  1.00  0.00
ATOM   4462 HH11 ARG   481      29.620  53.470 -49.110  1.00  0.00
ATOM   4463 HH12 ARG   481      29.260  52.860 -50.700  1.00  0.00
ATOM   4464  NH2 ARG   481      30.630  50.690 -50.520  1.00  0.00
ATOM   4465 HH21 ARG   481      31.200  49.880 -50.340  1.00  0.00
ATOM   4466 HH22 ARG   481      30.170  50.800 -51.410  1.00  0.00
ATOM   4467  C   ARG   481      28.020  54.220 -43.650  1.00  0.00
ATOM   4468  O   ARG   481      28.660  54.500 -42.640  1.00  0.00
ATOM   4469  N   GLU   482      27.070  55.020 -44.160  1.00  0.00
ATOM   4470  HN  GLU   482      26.600  54.750 -45.010  1.00  0.00
ATOM   4471  CA  GLU   482      26.700  56.260 -43.530  1.00  0.00
ATOM   4472  CB  GLU   482      25.640  57.040 -44.320  1.00  0.00
ATOM   4473  CG  GLU   482      26.090  57.580 -45.680  1.00  0.00
ATOM   4474  CD  GLU   482      24.880  58.300 -46.270  1.00  0.00
ATOM   4475  OE1 GLU   482      23.820  58.320 -45.600  1.00  0.00
ATOM   4476  OE2 GLU   482      25.010  58.850 -47.400  1.00  0.00
ATOM   4477  C   GLU   482      26.070  55.990 -42.210  1.00  0.00
ATOM   4478  O   GLU   482      26.390  56.650 -41.220  1.00  0.00
ATOM   4479  N   ARG   483      25.160  54.990 -42.150  1.00  0.00
ATOM   4480  HN  ARG   483      25.020  54.400 -42.950  1.00  0.00
ATOM   4481  CA  ARG   483      24.380  54.770 -40.960  1.00  0.00
ATOM   4482  CB  ARG   483      23.010  54.140 -41.240  1.00  0.00
ATOM   4483  CG  ARG   483      22.080  55.060 -42.030  1.00  0.00
ATOM   4484  CD  ARG   483      21.660  56.320 -41.260  1.00  0.00
ATOM   4485  NE  ARG   483      22.710  57.350 -41.450  1.00  0.00
ATOM   4486  HE  ARG   483      23.500  57.390 -40.820  1.00  0.00
ATOM   4487  CZ  ARG   483      22.600  58.250 -42.470  1.00  0.00
ATOM   4488  NH1 ARG   483      21.510  58.230 -43.290  1.00  0.00
ATOM   4489 HH11 ARG   483      20.780  57.550 -43.140  1.00  0.00
ATOM   4490 HH12 ARG   483      21.430  58.900 -44.040  1.00  0.00
ATOM   4491  NH2 ARG   483      23.590  59.180 -42.670  1.00  0.00
ATOM   4492 HH21 ARG   483      24.400  59.200 -42.070  1.00  0.00
ATOM   4493 HH22 ARG   483      23.510  59.850 -43.430  1.00  0.00
ATOM   4494  C   ARG   483      25.110  53.930 -39.970  1.00  0.00
ATOM   4495  O   ARG   483      25.940  53.090 -40.310  1.00  0.00
ATOM   4496  N   PHE   484      24.790  54.170 -38.680  1.00  0.00
ATOM   4497  HN  PHE   484      24.090  54.860 -38.480  1.00  0.00
ATOM   4498  CA  PHE   484      25.400  53.470 -37.580  1.00  0.00
ATOM   4499  CB  PHE   484      25.150  54.130 -36.210  1.00  0.00
ATOM   4500  CG  PHE   484      25.950  55.400 -36.210  1.00  0.00
ATOM   4501  CD1 PHE   484      25.440  56.550 -36.760  1.00  0.00
ATOM   4502  CD2 PHE   484      27.220  55.420 -35.670  1.00  0.00
ATOM   4503  CE1 PHE   484      26.180  57.710 -36.760  1.00  0.00
ATOM   4504  CE2 PHE   484      27.960  56.580 -35.670  1.00  0.00
ATOM   4505  CZ  PHE   484      27.440  57.730 -36.210  1.00  0.00
ATOM   4506  C   PHE   484      24.860  52.090 -37.550  1.00  0.00
ATOM   4507  O   PHE   484      24.040  51.710 -38.390  1.00  0.00
ATOM   4508  N   PRO   485      25.350  51.300 -36.640  1.00  0.00
ATOM   4509  CA  PRO   485      24.910  49.940 -36.570  1.00  0.00
ATOM   4510  CD  PRO   485      26.690  51.470 -36.110  1.00  0.00
ATOM   4511  CB  PRO   485      25.810  49.270 -35.540  1.00  0.00
ATOM   4512  CG  PRO   485      27.130  50.070 -35.650  1.00  0.00
ATOM   4513  C   PRO   485      23.440  49.850 -36.310  1.00  0.00
ATOM   4514  O   PRO   485      22.810  48.930 -36.830  1.00  0.00
ATOM   4515  N   LYS   486      22.880  50.760 -35.490  1.00  0.00
ATOM   4516  HN  LYS   486      23.440  51.490 -35.080  1.00  0.00
ATOM   4517  CA  LYS   486      21.470  50.690 -35.220  1.00  0.00
ATOM   4518  CB  LYS   486      21.010  51.630 -34.090  1.00  0.00
ATOM   4519  CG  LYS   486      21.540  51.260 -32.710  1.00  0.00
ATOM   4520  CD  LYS   486      21.090  52.230 -31.620  1.00  0.00
ATOM   4521  CE  LYS   486      19.580  52.200 -31.390  1.00  0.00
ATOM   4522  NZ  LYS   486      19.220  53.080 -30.260  1.00  0.00
ATOM   4523  HZ1 LYS   486      19.690  52.760 -29.420  1.00  0.00
ATOM   4524  HZ2 LYS   486      19.500  54.030 -30.460  1.00  0.00
ATOM   4525  HZ3 LYS   486      18.210  53.050 -30.110  1.00  0.00
ATOM   4526  C   LYS   486      20.670  51.010 -36.440  1.00  0.00
ATOM   4527  O   LYS   486      19.680  50.360 -36.740  1.00  0.00
ATOM   4528  N   VAL   487      21.100  52.040 -37.200  1.00  0.00
ATOM   4529  HN  VAL   487      21.980  52.480 -36.980  1.00  0.00
ATOM   4530  CA  VAL   487      20.320  52.530 -38.300  1.00  0.00
ATOM   4531  CB  VAL   487      20.930  53.730 -38.960  1.00  0.00
ATOM   4532  CG1 VAL   487      20.020  54.150 -40.130  1.00  0.00
ATOM   4533  CG2 VAL   487      21.160  54.820 -37.900  1.00  0.00
ATOM   4534  C   VAL   487      20.160  51.490 -39.370  1.00  0.00
ATOM   4535  O   VAL   487      19.040  51.210 -39.800  1.00  0.00
ATOM   4536  N   CYS   488      21.260  50.850 -39.810  1.00  0.00
ATOM   4537  HN  CYS   488      22.160  51.030 -39.390  1.00  0.00
ATOM   4538  CA  CYS   488      21.120  49.910 -40.880  1.00  0.00
ATOM   4539  CB  CYS   488      22.450  49.630 -41.600  1.00  0.00
ATOM   4540  SG  CYS   488      23.130  51.130 -42.360  1.00  0.00
ATOM   4541  C   CYS   488      20.630  48.620 -40.330  1.00  0.00
ATOM   4542  O   CYS   488      21.030  47.540 -40.760  1.00  0.00
ATOM   4543  N   GLU   489      19.700  48.710 -39.370  1.00  0.00
ATOM   4544  HN  GLU   489      19.400  49.630 -39.070  1.00  0.00
ATOM   4545  CA  GLU   489      19.110  47.570 -38.740  1.00  0.00
ATOM   4546  CB  GLU   489      18.160  47.990 -37.610  1.00  0.00
ATOM   4547  CG  GLU   489      17.300  46.850 -37.080  1.00  0.00
ATOM   4548  CD  GLU   489      16.030  46.790 -37.930  1.00  0.00
ATOM   4549  OE1 GLU   489      15.200  47.730 -37.830  1.00  0.00
ATOM   4550  OE2 GLU   489      15.890  45.800 -38.700  1.00  0.00
ATOM   4551  C   GLU   489      18.320  46.820 -39.760  1.00  0.00
ATOM   4552  O   GLU   489      18.380  45.590 -39.800  1.00  0.00
ATOM   4553  N   ILE   490      17.520  47.540 -40.580  1.00  0.00
ATOM   4554  HN  ILE   490      17.470  48.540 -40.490  1.00  0.00
ATOM   4555  CA  ILE   490      16.730  46.860 -41.570  1.00  0.00
ATOM   4556  CB  ILE   490      15.280  46.860 -41.160  1.00  0.00
ATOM   4557  CG2 ILE   490      14.780  48.320 -41.190  1.00  0.00
ATOM   4558  CG1 ILE   490      14.440  45.880 -41.990  1.00  0.00
ATOM   4559  CD1 ILE   490      14.670  44.420 -41.610  1.00  0.00
ATOM   4560  C   ILE   490      16.840  47.590 -42.890  1.00  0.00
ATOM   4561  O   ILE   490      15.860  47.660 -43.630  1.00  0.00
ATOM   4562  N   PRO   491      17.990  48.110 -43.250  1.00  0.00
ATOM   4563  CA  PRO   491      18.130  48.870 -44.460  1.00  0.00
ATOM   4564  CD  PRO   491      19.240  47.480 -42.920  1.00  0.00
ATOM   4565  CB  PRO   491      19.620  49.180 -44.610  1.00  0.00
ATOM   4566  CG  PRO   491      20.290  48.480 -43.410  1.00  0.00
ATOM   4567  C   PRO   491      17.690  48.160 -45.690  1.00  0.00
ATOM   4568  O   PRO   491      16.750  48.600 -46.350  1.00  0.00
ATOM   4569  N   PHE   492      18.320  47.010 -45.990  1.00  0.00
ATOM   4570  HN  PHE   492      18.960  46.610 -45.320  1.00  0.00
ATOM   4571  CA  PHE   492      18.100  46.360 -47.240  1.00  0.00
ATOM   4572  CB  PHE   492      19.040  45.190 -47.550  1.00  0.00
ATOM   4573  CG  PHE   492      18.890  45.050 -49.020  1.00  0.00
ATOM   4574  CD1 PHE   492      19.540  45.930 -49.850  1.00  0.00
ATOM   4575  CD2 PHE   492      18.100  44.080 -49.580  1.00  0.00
ATOM   4576  CE1 PHE   492      19.420  45.840 -51.210  1.00  0.00
ATOM   4577  CE2 PHE   492      17.970  43.980 -50.950  1.00  0.00
ATOM   4578  CZ  PHE   492      18.630  44.860 -51.770  1.00  0.00
ATOM   4579  C   PHE   492      16.710  45.840 -47.270  1.00  0.00
ATOM   4580  O   PHE   492      16.150  45.590 -48.330  1.00  0.00
ATOM   4581  N   ASN   493      16.150  45.540 -46.090  1.00  0.00
ATOM   4582  HN  ASN   493      16.680  45.670 -45.230  1.00  0.00
ATOM   4583  CA  ASN   493      14.810  45.050 -46.030  1.00  0.00
ATOM   4584  CB  ASN   493      14.430  44.570 -44.630  1.00  0.00
ATOM   4585  CG  ASN   493      15.190  43.280 -44.380  1.00  0.00
ATOM   4586  OD1 ASN   493      14.760  42.220 -44.830  1.00  0.00
ATOM   4587  ND2 ASN   493      16.350  43.360 -43.670  1.00  0.00
ATOM   4588 HD22 ASN   493      16.670  44.250 -43.330  1.00  0.00
ATOM   4589 HD21 ASN   493      16.890  42.520 -43.490  1.00  0.00
ATOM   4590  C   ASN   493      13.830  46.100 -46.450  1.00  0.00
ATOM   4591  O   ASN   493      12.930  45.850 -47.250  1.00  0.00
ATOM   4592  N   SER   494      14.000  47.330 -45.940  1.00  0.00
ATOM   4593  HN  SER   494      14.800  47.530 -45.350  1.00  0.00
ATOM   4594  CA  SER   494      13.050  48.360 -46.220  1.00  0.00
ATOM   4595  CB  SER   494      13.390  49.690 -45.540  1.00  0.00
ATOM   4596  OG  SER   494      13.390  49.530 -44.130  1.00  0.00
ATOM   4597  HG  SER   494      13.610  50.370 -43.710  1.00  0.00
ATOM   4598  C   SER   494      13.050  48.600 -47.690  1.00  0.00
ATOM   4599  O   SER   494      12.020  48.870 -48.300  1.00  0.00
ATOM   4600  N   THR   495      14.240  48.480 -48.310  1.00  0.00
ATOM   4601  HN  THR   495      15.030  48.160 -47.780  1.00  0.00
ATOM   4602  CA  THR   495      14.420  48.800 -49.700  1.00  0.00
ATOM   4603  CB  THR   495      15.860  48.790 -50.130  1.00  0.00
ATOM   4604  OG1 THR   495      16.400  47.490 -50.050  1.00  0.00
ATOM   4605  HG1 THR   495      17.320  47.500 -50.340  1.00  0.00
ATOM   4606  CG2 THR   495      16.650  49.750 -49.230  1.00  0.00
ATOM   4607  C   THR   495      13.650  47.870 -50.580  1.00  0.00
ATOM   4608  O   THR   495      13.190  48.320 -51.630  1.00  0.00
ATOM   4609  N   ASN   496      13.490  46.580 -50.210  1.00  0.00
ATOM   4610  HN  ASN   496      13.860  46.250 -49.330  1.00  0.00
ATOM   4611  CA  ASN   496      12.790  45.680 -51.090  1.00  0.00
ATOM   4612  CB  ASN   496      12.960  44.200 -50.740  1.00  0.00
ATOM   4613  CG  ASN   496      14.360  43.780 -51.160  1.00  0.00
ATOM   4614  OD1 ASN   496      14.930  44.340 -52.100  1.00  0.00
ATOM   4615  ND2 ASN   496      14.940  42.780 -50.450  1.00  0.00
ATOM   4616 HD22 ASN   496      14.440  42.350 -49.690  1.00  0.00
ATOM   4617 HD21 ASN   496      15.870  42.460 -50.690  1.00  0.00
ATOM   4618  C   ASN   496      11.320  46.010 -51.070  1.00  0.00
ATOM   4619  O   ASN   496      10.540  45.340 -50.400  1.00  0.00
ATOM   4620  N   LYS   497      10.930  47.050 -51.850  1.00  0.00
ATOM   4621  HN  LYS   497      11.660  47.540 -52.360  1.00  0.00
ATOM   4622  CA  LYS   497       9.590  47.530 -52.010  1.00  0.00
ATOM   4623  CB  LYS   497       9.440  49.030 -51.710  1.00  0.00
ATOM   4624  CG  LYS   497       9.490  49.380 -50.220  1.00  0.00
ATOM   4625  CD  LYS   497       8.340  48.790 -49.410  1.00  0.00
ATOM   4626  CE  LYS   497       8.340  49.230 -47.940  1.00  0.00
ATOM   4627  NZ  LYS   497       7.910  50.640 -47.850  1.00  0.00
ATOM   4628  HZ1 LYS   497       8.550  51.230 -48.370  1.00  0.00
ATOM   4629  HZ2 LYS   497       6.970  50.740 -48.230  1.00  0.00
ATOM   4630  HZ3 LYS   497       7.910  50.930 -46.880  1.00  0.00
ATOM   4631  C   LYS   497       9.280  47.360 -53.460  1.00  0.00
ATOM   4632  O   LYS   497       8.350  47.980 -53.980  1.00  0.00
ATOM   4633  N   PHE   498      10.050  46.500 -54.150  1.00  0.00
ATOM   4634  HN  PHE   498      10.810  46.020 -53.690  1.00  0.00
ATOM   4635  CA  PHE   498       9.770  46.280 -55.530  1.00  0.00
ATOM   4636  CB  PHE   498      10.730  45.300 -56.220  1.00  0.00
ATOM   4637  CG  PHE   498      10.300  45.190 -57.640  1.00  0.00
ATOM   4638  CD1 PHE   498       9.310  44.300 -58.010  1.00  0.00
ATOM   4639  CD2 PHE   498      10.870  45.970 -58.610  1.00  0.00
ATOM   4640  CE1 PHE   498       8.900  44.200 -59.320  1.00  0.00
ATOM   4641  CE2 PHE   498      10.470  45.880 -59.930  1.00  0.00
ATOM   4642  CZ  PHE   498       9.480  44.990 -60.280  1.00  0.00
ATOM   4643  C   PHE   498       8.410  45.680 -55.570  1.00  0.00
ATOM   4644  O   PHE   498       7.570  46.060 -56.380  1.00  0.00
ATOM   4645  N   GLN   499       8.170  44.720 -54.670  1.00  0.00
ATOM   4646  HN  GLN   499       8.860  44.450 -53.980  1.00  0.00
ATOM   4647  CA  GLN   499       6.900  44.080 -54.720  1.00  0.00
ATOM   4648  CB  GLN   499       6.960  42.550 -54.560  1.00  0.00
ATOM   4649  CG  GLN   499       5.600  41.870 -54.680  1.00  0.00
ATOM   4650  CD  GLN   499       5.170  41.970 -56.140  1.00  0.00
ATOM   4651  OE1 GLN   499       5.850  42.600 -56.950  1.00  0.00
ATOM   4652  NE2 GLN   499       4.030  41.320 -56.480  1.00  0.00
ATOM   4653 HE22 GLN   499       3.510  40.810 -55.780  1.00  0.00
ATOM   4654 HE21 GLN   499       3.700  41.350 -57.440  1.00  0.00
ATOM   4655  C   GLN   499       6.070  44.600 -53.600  1.00  0.00
ATOM   4656  O   GLN   499       6.550  44.840 -52.490  1.00  0.00
ATOM   4657  N   LEU   500       4.770  44.820 -53.880  1.00  0.00
ATOM   4658  HN  LEU   500       4.430  44.690 -54.820  1.00  0.00
ATOM   4659  CA  LEU   500       3.880  45.230 -52.850  1.00  0.00
ATOM   4660  CB  LEU   500       2.740  46.130 -53.350  1.00  0.00
ATOM   4661  CG  LEU   500       1.770  46.570 -52.230  1.00  0.00
ATOM   4662  CD2 LEU   500       0.510  47.230 -52.810  1.00  0.00
ATOM   4663  CD1 LEU   500       2.480  47.450 -51.190  1.00  0.00
ATOM   4664  C   LEU   500       3.270  43.960 -52.360  1.00  0.00
ATOM   4665  O   LEU   500       2.690  43.210 -53.140  1.00  0.00
ATOM   4666  N   SER   501       3.420  43.670 -51.060  1.00  0.00
ATOM   4667  HN  SER   501       3.920  44.290 -50.430  1.00  0.00
ATOM   4668  CA  SER   501       2.830  42.460 -50.590  1.00  0.00
ATOM   4669  CB  SER   501       3.460  41.920 -49.290  1.00  0.00
ATOM   4670  OG  SER   501       3.310  42.860 -48.240  1.00  0.00
ATOM   4671  HG  SER   501       3.710  42.520 -47.440  1.00  0.00
ATOM   4672  C   SER   501       1.400  42.770 -50.310  1.00  0.00
ATOM   4673  O   SER   501       1.070  43.480 -49.370  1.00  0.00
ATOM   4674  N   ILE   502       0.510  42.280 -51.190  1.00  0.00
ATOM   4675  HN  ILE   502       0.810  41.730 -51.980  1.00  0.00
ATOM   4676  CA  ILE   502      -0.890  42.540 -51.000  1.00  0.00
ATOM   4677  CB  ILE   502      -1.720  42.160 -52.180  1.00  0.00
ATOM   4678  CG2 ILE   502      -3.200  42.330 -51.810  1.00  0.00
ATOM   4679  CG1 ILE   502      -1.290  42.980 -53.410  1.00  0.00
ATOM   4680  CD1 ILE   502      -1.870  42.480 -54.730  1.00  0.00
ATOM   4681  C   ILE   502      -1.360  41.750 -49.820  1.00  0.00
ATOM   4682  O   ILE   502      -2.010  42.280 -48.920  1.00  0.00
ATOM   4683  N   HIS   503      -1.020  40.450 -49.810  1.00  0.00
ATOM   4684  HN  HIS   503      -0.430  40.090 -50.550  1.00  0.00
ATOM   4685  CA  HIS   503      -1.480  39.580 -48.780  1.00  0.00
ATOM   4686  ND1 HIS   503      -2.670  37.040 -50.780  1.00  0.00
ATOM   4687  CG  HIS   503      -2.870  38.370 -50.490  1.00  0.00
ATOM   4688  CB  HIS   503      -2.850  38.960 -49.110  1.00  0.00
ATOM   4689  NE2 HIS   503      -2.990  38.070 -52.730  1.00  0.00
ATOM   4690  HE2 HIS   503      -3.100  38.250 -53.720  1.00  0.00
ATOM   4691  CD2 HIS   503      -3.070  38.990 -51.690  1.00  0.00
ATOM   4692  CE1 HIS   503      -2.750  36.920 -52.130  1.00  0.00
ATOM   4693  C   HIS   503      -0.490  38.470 -48.720  1.00  0.00
ATOM   4694  O   HIS   503       0.490  38.460 -49.460  1.00  0.00
ATOM   4695  N   THR   504      -0.700  37.520 -47.800  1.00  0.00
ATOM   4696  HN  THR   504      -1.470  37.570 -47.150  1.00  0.00
ATOM   4697  CA  THR   504       0.220  36.430 -47.770  1.00  0.00
ATOM   4698  CB  THR   504       1.290  36.590 -46.730  1.00  0.00
ATOM   4699  OG1 THR   504       2.190  35.490 -46.750  1.00  0.00
ATOM   4700  HG1 THR   504       2.860  35.620 -46.080  1.00  0.00
ATOM   4701  CG2 THR   504       0.610  36.730 -45.360  1.00  0.00
ATOM   4702  C   THR   504      -0.540  35.180 -47.490  1.00  0.00
ATOM   4703  O   THR   504      -1.520  35.190 -46.740  1.00  0.00
ATOM   4704  N   LEU   505      -0.130  34.050 -48.110  1.00  0.00
ATOM   4705  HN  LEU   505       0.630  34.080 -48.770  1.00  0.00
ATOM   4706  CA  LEU   505      -0.790  32.820 -47.810  1.00  0.00
ATOM   4707  CB  LEU   505      -0.950  31.880 -49.020  1.00  0.00
ATOM   4708  CG  LEU   505      -1.850  32.470 -50.130  1.00  0.00
ATOM   4709  CD2 LEU   505      -3.150  33.050 -49.550  1.00  0.00
ATOM   4710  CD1 LEU   505      -2.100  31.440 -51.240  1.00  0.00
ATOM   4711  C   LEU   505       0.080  32.170 -46.790  1.00  0.00
ATOM   4712  O   LEU   505       1.110  31.580 -47.120  1.00  0.00
ATOM   4713  N   GLU   506      -0.370  32.230 -45.520  1.00  0.00
ATOM   4714  HN  GLU   506      -1.300  32.610 -45.380  1.00  0.00
ATOM   4715  CA  GLU   506       0.350  31.820 -44.360  1.00  0.00
ATOM   4716  CB  GLU   506      -0.490  31.880 -43.080  1.00  0.00
ATOM   4717  CG  GLU   506      -0.860  33.320 -42.710  1.00  0.00
ATOM   4718  CD  GLU   506       0.440  34.020 -42.360  1.00  0.00
ATOM   4719  OE1 GLU   506       1.420  33.300 -42.050  1.00  0.00
ATOM   4720  OE2 GLU   506       0.470  35.280 -42.410  1.00  0.00
ATOM   4721  C   GLU   506       0.800  30.410 -44.510  1.00  0.00
ATOM   4722  O   GLU   506       0.160  29.620 -45.200  1.00  0.00
ATOM   4723  N   ASP   507       1.950  30.110 -43.890  1.00  0.00
ATOM   4724  HN  ASP   507       2.420  30.830 -43.360  1.00  0.00
ATOM   4725  CA  ASP   507       2.540  28.810 -43.950  1.00  0.00
ATOM   4726  CB  ASP   507       3.960  28.760 -43.340  1.00  0.00
ATOM   4727  CG  ASP   507       4.880  29.540 -44.260  1.00  0.00
ATOM   4728  OD1 ASP   507       4.810  29.330 -45.500  1.00  0.00
ATOM   4729  OD2 ASP   507       5.680  30.360 -43.740  1.00  0.00
ATOM   4730  C   ASP   507       1.680  27.850 -43.190  1.00  0.00
ATOM   4731  O   ASP   507       1.290  28.100 -42.050  1.00  0.00
ATOM   4732  N   PRO   508       1.330  26.800 -43.870  1.00  0.00
ATOM   4733  CA  PRO   508       0.560  25.750 -43.250  1.00  0.00
ATOM   4734  CD  PRO   508       1.010  26.920 -45.280  1.00  0.00
ATOM   4735  CB  PRO   508      -0.410  25.240 -44.310  1.00  0.00
ATOM   4736  CG  PRO   508       0.240  25.650 -45.640  1.00  0.00
ATOM   4737  C   PRO   508       1.500  24.690 -42.800  1.00  0.00
ATOM   4738  O   PRO   508       2.640  24.660 -43.250  1.00  0.00
ATOM   4739  N   ARG   509       1.010  23.780 -41.950  1.00  0.00
ATOM   4740  HN  ARG   509       0.070  23.880 -41.590  1.00  0.00
ATOM   4741  CA  ARG   509       1.810  22.670 -41.550  1.00  0.00
ATOM   4742  CB  ARG   509       1.070  21.750 -40.570  1.00  0.00
ATOM   4743  CG  ARG   509       1.870  20.520 -40.160  1.00  0.00
ATOM   4744  CD  ARG   509       1.130  19.610 -39.180  1.00  0.00
ATOM   4745  NE  ARG   509       2.000  18.440 -38.920  1.00  0.00
ATOM   4746  HE  ARG   509       2.430  17.940 -39.690  1.00  0.00
ATOM   4747  CZ  ARG   509       2.210  18.030 -37.630  1.00  0.00
ATOM   4748  NH1 ARG   509       1.640  18.720 -36.600  1.00  0.00
ATOM   4749 HH11 ARG   509       1.060  19.530 -36.790  1.00  0.00
ATOM   4750 HH12 ARG   509       1.800  18.430 -35.650  1.00  0.00
ATOM   4751  NH2 ARG   509       3.000  16.940 -37.380  1.00  0.00
ATOM   4752 HH21 ARG   509       3.420  16.440 -38.150  1.00  0.00
ATOM   4753 HH22 ARG   509       3.160  16.650 -36.430  1.00  0.00
ATOM   4754  C   ARG   509       2.060  21.900 -42.790  1.00  0.00
ATOM   4755  O   ARG   509       3.130  21.310 -42.970  1.00  0.00
ATOM   4756  N   ASP   510       1.070  21.890 -43.710  1.00  0.00
ATOM   4757  HN  ASP   510       0.230  22.430 -43.560  1.00  0.00
ATOM   4758  CA  ASP   510       1.240  21.110 -44.880  1.00  0.00
ATOM   4759  CB  ASP   510      -0.070  20.450 -45.360  1.00  0.00
ATOM   4760  CG  ASP   510      -0.460  19.400 -44.330  1.00  0.00
ATOM   4761  OD1 ASP   510       0.470  18.770 -43.750  1.00  0.00
ATOM   4762  OD2 ASP   510      -1.680  19.220 -44.090  1.00  0.00
ATOM   4763  C   ASP   510       2.020  21.870 -45.950  1.00  0.00
ATOM   4764  O   ASP   510       3.240  21.850 -45.850  1.00  0.00
ATOM   4765  N   PRO   511       1.480  22.530 -46.970  1.00  0.00
ATOM   4766  CA  PRO   511       2.250  23.080 -48.080  1.00  0.00
ATOM   4767  CD  PRO   511       0.070  22.880 -47.090  1.00  0.00
ATOM   4768  CB  PRO   511       1.220  23.670 -49.050  1.00  0.00
ATOM   4769  CG  PRO   511      -0.140  23.120 -48.590  1.00  0.00
ATOM   4770  C   PRO   511       3.400  24.060 -47.920  1.00  0.00
ATOM   4771  O   PRO   511       4.460  23.780 -48.480  1.00  0.00
ATOM   4772  N   ARG   512       3.260  25.160 -47.140  1.00  0.00
ATOM   4773  HN  ARG   512       2.390  25.220 -46.630  1.00  0.00
ATOM   4774  CA  ARG   512       4.180  26.280 -46.930  1.00  0.00
ATOM   4775  CB  ARG   512       5.460  25.870 -46.170  1.00  0.00
ATOM   4776  CG  ARG   512       5.170  25.350 -44.750  1.00  0.00
ATOM   4777  CD  ARG   512       6.410  25.240 -43.860  1.00  0.00
ATOM   4778  NE  ARG   512       6.380  26.380 -42.900  1.00  0.00
ATOM   4779  HE  ARG   512       6.840  27.250 -43.140  1.00  0.00
ATOM   4780  CZ  ARG   512       5.730  26.260 -41.710  1.00  0.00
ATOM   4781  NH1 ARG   512       5.150  25.080 -41.360  1.00  0.00
ATOM   4782 HH11 ARG   512       5.190  24.290 -41.990  1.00  0.00
ATOM   4783 HH12 ARG   512       4.670  24.990 -40.470  1.00  0.00
ATOM   4784  NH2 ARG   512       5.660  27.320 -40.850  1.00  0.00
ATOM   4785 HH21 ARG   512       6.090  28.200 -41.110  1.00  0.00
ATOM   4786 HH22 ARG   512       5.180  27.230 -39.970  1.00  0.00
ATOM   4787  C   ARG   512       4.600  27.220 -48.110  1.00  0.00
ATOM   4788  O   ARG   512       5.670  26.990 -48.680  1.00  0.00
ATOM   4789  N   HIS   513       3.740  28.250 -48.540  1.00  0.00
ATOM   4790  HN  HIS   513       2.780  28.130 -48.270  1.00  0.00
ATOM   4791  CA  HIS   513       4.000  29.500 -49.330  1.00  0.00
ATOM   4792  ND1 HIS   513       5.690  31.340 -47.070  1.00  0.00
ATOM   4793  CG  HIS   513       5.440  31.310 -48.420  1.00  0.00
ATOM   4794  CB  HIS   513       5.430  30.070 -49.280  1.00  0.00
ATOM   4795  NE2 HIS   513       5.250  33.430 -47.680  1.00  0.00
ATOM   4796  HE2 HIS   513       5.100  34.430 -47.650  1.00  0.00
ATOM   4797  CD2 HIS   513       5.180  32.600 -48.780  1.00  0.00
ATOM   4798  CE1 HIS   513       5.560  32.630 -46.680  1.00  0.00
ATOM   4799  C   HIS   513       3.410  29.790 -50.740  1.00  0.00
ATOM   4800  O   HIS   513       2.900  28.900 -51.410  1.00  0.00
ATOM   4801  N   VAL   514       3.470  31.110 -51.210  1.00  0.00
ATOM   4802  HN  VAL   514       3.930  31.780 -50.610  1.00  0.00
ATOM   4803  CA  VAL   514       2.940  31.610 -52.490  1.00  0.00
ATOM   4804  CB  VAL   514       1.450  31.870 -52.420  1.00  0.00
ATOM   4805  CG1 VAL   514       0.930  32.430 -53.760  1.00  0.00
ATOM   4806  CG2 VAL   514       0.760  30.560 -52.020  1.00  0.00
ATOM   4807  C   VAL   514       3.600  32.890 -52.990  1.00  0.00
ATOM   4808  O   VAL   514       4.050  33.730 -52.200  1.00  0.00
ATOM   4809  N   LEU   515       3.600  33.120 -54.340  1.00  0.00
ATOM   4810  HN  LEU   515       3.070  32.500 -54.940  1.00  0.00
ATOM   4811  CA  LEU   515       4.310  34.220 -54.940  1.00  0.00
ATOM   4812  CB  LEU   515       3.980  35.620 -54.380  1.00  0.00
ATOM   4813  CG  LEU   515       2.620  36.160 -54.850  1.00  0.00
ATOM   4814  CD2 LEU   515       2.490  37.660 -54.550  1.00  0.00
ATOM   4815  CD1 LEU   515       1.460  35.330 -54.310  1.00  0.00
ATOM   4816  C   LEU   515       5.710  33.890 -54.610  1.00  0.00
ATOM   4817  O   LEU   515       6.370  33.130 -55.320  1.00  0.00
ATOM   4818  N   VAL   516       6.190  34.470 -53.510  1.00  0.00
ATOM   4819  HN  VAL   516       5.620  35.140 -53.000  1.00  0.00
ATOM   4820  CA  VAL   516       7.490  34.150 -53.040  1.00  0.00
ATOM   4821  CB  VAL   516       8.080  35.330 -52.350  1.00  0.00
ATOM   4822  CG1 VAL   516       9.430  34.930 -51.770  1.00  0.00
ATOM   4823  CG2 VAL   516       8.170  36.500 -53.350  1.00  0.00
ATOM   4824  C   VAL   516       7.280  33.040 -52.050  1.00  0.00
ATOM   4825  O   VAL   516       6.820  33.280 -50.940  1.00  0.00
ATOM   4826  N   MET   517       7.640  31.800 -52.440  1.00  0.00
ATOM   4827  HN  MET   517       8.090  31.660 -53.330  1.00  0.00
ATOM   4828  CA  MET   517       7.370  30.670 -51.590  1.00  0.00
ATOM   4829  CB  MET   517       6.920  29.410 -52.340  1.00  0.00
ATOM   4830  CG  MET   517       6.640  28.240 -51.400  1.00  0.00
ATOM   4831  SD  MET   517       6.220  26.710 -52.260  1.00  0.00
ATOM   4832  CE  MET   517       7.840  26.680 -53.090  1.00  0.00
ATOM   4833  C   MET   517       8.570  30.290 -50.780  1.00  0.00
ATOM   4834  O   MET   517       9.690  30.210 -51.300  1.00  0.00
ATOM   4835  N   LYS   518       8.370  30.040 -49.470  1.00  0.00
ATOM   4836  HN  LYS   518       7.450  30.190 -49.070  1.00  0.00
ATOM   4837  CA  LYS   518       9.440  29.570 -48.640  1.00  0.00
ATOM   4838  CB  LYS   518       9.980  30.590 -47.620  1.00  0.00
ATOM   4839  CG  LYS   518       9.030  30.890 -46.460  1.00  0.00
ATOM   4840  CD  LYS   518       9.720  31.610 -45.300  1.00  0.00
ATOM   4841  CE  LYS   518       8.810  31.880 -44.100  1.00  0.00
ATOM   4842  NZ  LYS   518       9.570  32.580 -43.040  1.00  0.00
ATOM   4843  HZ1 LYS   518      10.350  32.010 -42.750  1.00  0.00
ATOM   4844  HZ2 LYS   518       9.930  33.460 -43.410  1.00  0.00
ATOM   4845  HZ3 LYS   518       8.970  32.760 -42.250  1.00  0.00
ATOM   4846  C   LYS   518       8.930  28.390 -47.900  1.00  0.00
ATOM   4847  O   LYS   518       7.930  28.480 -47.180  1.00  0.00
ATOM   4848  N   GLY   519       9.610  27.230 -48.020  1.00  0.00
ATOM   4849  HN  GLY   519      10.460  27.170 -48.560  1.00  0.00
ATOM   4850  CA  GLY   519       9.070  26.080 -47.360  1.00  0.00
ATOM   4851  C   GLY   519      10.080  25.000 -47.290  1.00  0.00
ATOM   4852  O   GLY   519      11.250  25.190 -47.620  1.00  0.00
ATOM   4853  N   ALA   520       9.640  23.810 -46.840  1.00  0.00
ATOM   4854  HN  ALA   520       8.660  23.730 -46.590  1.00  0.00
ATOM   4855  CA  ALA   520      10.470  22.650 -46.710  1.00  0.00
ATOM   4856  CB  ALA   520       9.730  21.460 -46.070  1.00  0.00
ATOM   4857  C   ALA   520      10.860  22.220 -48.080  1.00  0.00
ATOM   4858  O   ALA   520      10.030  22.200 -48.990  1.00  0.00
ATOM   4859  N   PRO   521      12.090  21.830 -48.240  1.00  0.00
ATOM   4860  CA  PRO   521      12.630  21.510 -49.530  1.00  0.00
ATOM   4861  CD  PRO   521      13.120  22.110 -47.260  1.00  0.00
ATOM   4862  CB  PRO   521      14.110  21.180 -49.280  1.00  0.00
ATOM   4863  CG  PRO   521      14.460  22.000 -48.020  1.00  0.00
ATOM   4864  C   PRO   521      11.890  20.460 -50.290  1.00  0.00
ATOM   4865  O   PRO   521      11.730  20.610 -51.500  1.00  0.00
ATOM   4866  N   GLU   522      11.400  19.410 -49.620  1.00  0.00
ATOM   4867  HN  GLU   522      11.450  19.360 -48.610  1.00  0.00
ATOM   4868  CA  GLU   522      10.820  18.350 -50.380  1.00  0.00
ATOM   4869  CB  GLU   522      10.360  17.180 -49.500  1.00  0.00
ATOM   4870  CG  GLU   522       9.400  17.610 -48.380  1.00  0.00
ATOM   4871  CD  GLU   522      10.220  18.210 -47.250  1.00  0.00
ATOM   4872  OE1 GLU   522      11.480  18.150 -47.330  1.00  0.00
ATOM   4873  OE2 GLU   522       9.610  18.730 -46.280  1.00  0.00
ATOM   4874  C   GLU   522       9.620  18.830 -51.150  1.00  0.00
ATOM   4875  O   GLU   522       9.560  18.670 -52.360  1.00  0.00
ATOM   4876  N   ARG   523       8.670  19.480 -50.460  1.00  0.00
ATOM   4877  HN  ARG   523       8.810  19.710 -49.490  1.00  0.00
ATOM   4878  CA  ARG   523       7.440  19.850 -51.110  1.00  0.00
ATOM   4879  CB  ARG   523       6.460  20.500 -50.130  1.00  0.00
ATOM   4880  CG  ARG   523       5.000  20.460 -50.560  1.00  0.00
ATOM   4881  CD  ARG   523       4.300  19.130 -50.230  1.00  0.00
ATOM   4882  NE  ARG   523       3.820  19.220 -48.820  1.00  0.00
ATOM   4883  HE  ARG   523       3.030  19.820 -48.600  1.00  0.00
ATOM   4884  CZ  ARG   523       4.420  18.520 -47.820  1.00  0.00
ATOM   4885  NH1 ARG   523       5.420  17.630 -48.100  1.00  0.00
ATOM   4886 HH11 ARG   523       5.730  17.500 -49.050  1.00  0.00
ATOM   4887 HH12 ARG   523       5.860  17.110 -47.350  1.00  0.00
ATOM   4888  NH2 ARG   523       4.010  18.690 -46.530  1.00  0.00
ATOM   4889 HH21 ARG   523       3.270  19.340 -46.310  1.00  0.00
ATOM   4890 HH22 ARG   523       4.450  18.160 -45.780  1.00  0.00
ATOM   4891  C   ARG   523       7.710  20.850 -52.200  1.00  0.00
ATOM   4892  O   ARG   523       7.400  20.640 -53.370  1.00  0.00
ATOM   4893  N   VAL   524       8.370  21.960 -51.820  1.00  0.00
ATOM   4894  HN  VAL   524       8.750  22.010 -50.890  1.00  0.00
ATOM   4895  CA  VAL   524       8.570  23.080 -52.700  1.00  0.00
ATOM   4896  CB  VAL   524       9.240  24.190 -51.990  1.00  0.00
ATOM   4897  CG1 VAL   524       8.290  24.740 -50.930  1.00  0.00
ATOM   4898  CG2 VAL   524      10.440  23.540 -51.330  1.00  0.00
ATOM   4899  C   VAL   524       9.380  22.700 -53.910  1.00  0.00
ATOM   4900  O   VAL   524       8.940  22.930 -55.030  1.00  0.00
ATOM   4901  N   LEU   525      10.530  22.030 -53.710  1.00  0.00
ATOM   4902  HN  LEU   525      10.800  21.750 -52.780  1.00  0.00
ATOM   4903  CA  LEU   525      11.370  21.710 -54.830  1.00  0.00
ATOM   4904  CB  LEU   525      12.600  20.870 -54.450  1.00  0.00
ATOM   4905  CG  LEU   525      13.460  20.480 -55.670  1.00  0.00
ATOM   4906  CD2 LEU   525      14.430  19.340 -55.330  1.00  0.00
ATOM   4907  CD1 LEU   525      14.140  21.700 -56.300  1.00  0.00
ATOM   4908  C   LEU   525      10.580  20.870 -55.770  1.00  0.00
ATOM   4909  O   LEU   525      10.700  21.000 -56.990  1.00  0.00
ATOM   4910  N   GLU   526       9.710  20.020 -55.210  1.00  0.00
ATOM   4911  HN  GLU   526       9.590  20.010 -54.200  1.00  0.00
ATOM   4912  CA  GLU   526       8.940  19.130 -56.020  1.00  0.00
ATOM   4913  CB  GLU   526       7.910  18.290 -55.230  1.00  0.00
ATOM   4914  CG  GLU   526       7.120  17.350 -56.140  1.00  0.00
ATOM   4915  CD  GLU   526       6.030  16.670 -55.310  1.00  0.00
ATOM   4916  OE1 GLU   526       5.930  16.980 -54.100  1.00  0.00
ATOM   4917  OE2 GLU   526       5.280  15.840 -55.890  1.00  0.00
ATOM   4918  C   GLU   526       8.170  19.940 -56.990  1.00  0.00
ATOM   4919  O   GLU   526       7.860  19.460 -58.080  1.00  0.00
ATOM   4920  N   ARG   527       7.800  21.180 -56.610  1.00  0.00
ATOM   4921  HN  ARG   527       8.120  21.580 -55.740  1.00  0.00
ATOM   4922  CA  ARG   527       6.950  21.920 -57.500  1.00  0.00
ATOM   4923  CB  ARG   527       5.800  22.600 -56.730  1.00  0.00
ATOM   4924  CG  ARG   527       4.880  21.620 -56.000  1.00  0.00
ATOM   4925  CD  ARG   527       3.990  22.310 -54.960  1.00  0.00
ATOM   4926  NE  ARG   527       4.910  22.940 -53.970  1.00  0.00
ATOM   4927  HE  ARG   527       5.880  23.070 -54.200  1.00  0.00
ATOM   4928  CZ  ARG   527       4.440  23.340 -52.750  1.00  0.00
ATOM   4929  NH1 ARG   527       3.120  23.190 -52.440  1.00  0.00
ATOM   4930 HH11 ARG   527       2.490  22.780 -53.120  1.00  0.00
ATOM   4931 HH12 ARG   527       2.770  23.480 -51.540  1.00  0.00
ATOM   4932  NH2 ARG   527       5.290  23.890 -51.830  1.00  0.00
ATOM   4933 HH21 ARG   527       6.260  24.000 -52.060  1.00  0.00
ATOM   4934 HH22 ARG   527       4.930  24.180 -50.940  1.00  0.00
ATOM   4935  C   ARG   527       7.660  23.030 -58.210  1.00  0.00
ATOM   4936  O   ARG   527       7.040  24.050 -58.530  1.00  0.00
ATOM   4937  N   CYS   528       8.960  22.880 -58.560  1.00  0.00
ATOM   4938  HN  CYS   528       9.470  22.040 -58.330  1.00  0.00
ATOM   4939  CA  CYS   528       9.600  23.960 -59.270  1.00  0.00
ATOM   4940  CB  CYS   528      10.910  24.440 -58.630  1.00  0.00
ATOM   4941  SG  CYS   528      10.610  25.220 -57.010  1.00  0.00
ATOM   4942  C   CYS   528       9.920  23.490 -60.660  1.00  0.00
ATOM   4943  O   CYS   528      10.530  22.430 -60.840  1.00  0.00
ATOM   4944  N   SER   529       9.430  24.230 -61.670  1.00  0.00
ATOM   4945  HN  SER   529       8.850  25.020 -61.430  1.00  0.00
ATOM   4946  CA  SER   529       9.670  23.980 -63.070  1.00  0.00
ATOM   4947  CB  SER   529       8.570  24.570 -63.960  1.00  0.00
ATOM   4948  OG  SER   529       8.580  25.990 -63.890  1.00  0.00
ATOM   4949  HG  SER   529       7.890  26.340 -64.450  1.00  0.00
ATOM   4950  C   SER   529      10.960  24.600 -63.520  1.00  0.00
ATOM   4951  O   SER   529      11.590  24.120 -64.460  1.00  0.00
ATOM   4952  N   SER   530      11.390  25.710 -62.880  1.00  0.00
ATOM   4953  HN  SER   530      10.920  26.050 -62.060  1.00  0.00
ATOM   4954  CA  SER   530      12.540  26.400 -63.410  1.00  0.00
ATOM   4955  CB  SER   530      12.200  27.750 -64.060  1.00  0.00
ATOM   4956  OG  SER   530      11.370  27.550 -65.190  1.00  0.00
ATOM   4957  HG  SER   530      11.160  28.400 -65.590  1.00  0.00
ATOM   4958  C   SER   530      13.540  26.680 -62.330  1.00  0.00
ATOM   4959  O   SER   530      13.200  26.680 -61.140  1.00  0.00
ATOM   4960  N   ILE   531      14.810  26.900 -62.730  1.00  0.00
ATOM   4961  HN  ILE   531      15.020  26.860 -63.720  1.00  0.00
ATOM   4962  CA  ILE   531      15.860  27.180 -61.790  1.00  0.00
ATOM   4963  CB  ILE   531      16.940  26.150 -61.780  1.00  0.00
ATOM   4964  CG2 ILE   531      16.330  24.830 -61.300  1.00  0.00
ATOM   4965  CG1 ILE   531      17.630  26.060 -63.150  1.00  0.00
ATOM   4966  CD1 ILE   531      18.920  25.240 -63.120  1.00  0.00
ATOM   4967  C   ILE   531      16.470  28.510 -62.140  1.00  0.00
ATOM   4968  O   ILE   531      16.650  28.850 -63.310  1.00  0.00
ATOM   4969  N   LEU   532      16.810  29.310 -61.120  1.00  0.00
ATOM   4970  HN  LEU   532      16.670  29.000 -60.170  1.00  0.00
ATOM   4971  CA  LEU   532      17.360  30.620 -61.370  1.00  0.00
ATOM   4972  CB  LEU   532      16.860  31.650 -60.340  1.00  0.00
ATOM   4973  CG  LEU   532      17.350  33.100 -60.580  1.00  0.00
ATOM   4974  CD2 LEU   532      17.170  33.960 -59.320  1.00  0.00
ATOM   4975  CD1 LEU   532      16.690  33.720 -61.820  1.00  0.00
ATOM   4976  C   LEU   532      18.850  30.530 -61.190  1.00  0.00
ATOM   4977  O   LEU   532      19.340  29.850 -60.300  1.00  0.00
ATOM   4978  N   ILE   533      19.630  31.180 -62.080  1.00  0.00
ATOM   4979  HN  ILE   533      19.210  31.670 -62.860  1.00  0.00
ATOM   4980  CA  ILE   533      21.060  31.190 -61.910  1.00  0.00
ATOM   4981  CB  ILE   533      21.800  30.630 -63.090  1.00  0.00
ATOM   4982  CG2 ILE   533      23.300  30.800 -62.820  1.00  0.00
ATOM   4983  CG1 ILE   533      21.390  29.170 -63.340  1.00  0.00
ATOM   4984  CD1 ILE   533      21.890  28.620 -64.670  1.00  0.00
ATOM   4985  C   ILE   533      21.510  32.610 -61.750  1.00  0.00
ATOM   4986  O   ILE   533      21.720  33.310 -62.730  1.00  0.00
ATOM   4987  N   LYS   534      21.730  33.060 -60.500  1.00  0.00
ATOM   4988  HN  LYS   534      21.620  32.460 -59.700  1.00  0.00
ATOM   4989  CA  LYS   534      22.140  34.430 -60.340  1.00  0.00
ATOM   4990  CB  LYS   534      23.490  34.750 -61.000  1.00  0.00
ATOM   4991  CG  LYS   534      24.650  34.050 -60.290  1.00  0.00
ATOM   4992  CD  LYS   534      25.950  34.030 -61.090  1.00  0.00
ATOM   4993  CE  LYS   534      27.100  33.330 -60.360  1.00  0.00
ATOM   4994  NZ  LYS   534      28.300  33.280 -61.220  1.00  0.00
ATOM   4995  HZ1 LYS   534      28.090  32.760 -62.070  1.00  0.00
ATOM   4996  HZ2 LYS   534      28.590  34.220 -61.460  1.00  0.00
ATOM   4997  HZ3 LYS   534      29.050  32.810 -60.730  1.00  0.00
ATOM   4998  C   LYS   534      21.040  35.250 -60.940  1.00  0.00
ATOM   4999  O   LYS   534      19.900  35.170 -60.480  1.00  0.00
ATOM   5000  N   GLY   535      21.360  36.100 -61.930  1.00  0.00
ATOM   5001  HN  GLY   535      22.330  36.190 -62.210  1.00  0.00
ATOM   5002  CA  GLY   535      20.360  36.890 -62.580  1.00  0.00
ATOM   5003  C   GLY   535      19.450  36.090 -63.500  1.00  0.00
ATOM   5004  O   GLY   535      18.230  36.250 -63.450  1.00  0.00
ATOM   5005  N   GLN   536      20.000  35.190 -64.340  1.00  0.00
ATOM   5006  HN  GLN   536      20.980  34.980 -64.260  1.00  0.00
ATOM   5007  CA  GLN   536      19.210  34.530 -65.360  1.00  0.00
ATOM   5008  CB  GLN   536      20.050  33.940 -66.510  1.00  0.00
ATOM   5009  CG  GLN   536      20.990  32.820 -66.070  1.00  0.00
ATOM   5010  CD  GLN   536      21.760  32.330 -67.280  1.00  0.00
ATOM   5011  OE1 GLN   536      21.210  32.200 -68.380  1.00  0.00
ATOM   5012  NE2 GLN   536      23.070  32.050 -67.090  1.00  0.00
ATOM   5013 HE22 GLN   536      23.490  32.170 -66.170  1.00  0.00
ATOM   5014 HE21 GLN   536      23.640  31.720 -67.860  1.00  0.00
ATOM   5015  C   GLN   536      18.410  33.390 -64.780  1.00  0.00
ATOM   5016  O   GLN   536      18.620  33.010 -63.640  1.00  0.00
ATOM   5017  N   GLU   537      17.440  32.860 -65.570  1.00  0.00
ATOM   5018  HN  GLU   537      17.250  33.270 -66.470  1.00  0.00
ATOM   5019  CA  GLU   537      16.660  31.720 -65.150  1.00  0.00
ATOM   5020  CB  GLU   537      15.290  32.090 -64.550  1.00  0.00
ATOM   5021  CG  GLU   537      14.350  32.850 -65.490  1.00  0.00
ATOM   5022  CD  GLU   537      13.070  33.120 -64.710  1.00  0.00
ATOM   5023  OE1 GLU   537      13.160  33.200 -63.450  1.00  0.00
ATOM   5024  OE2 GLU   537      12.000  33.240 -65.360  1.00  0.00
ATOM   5025  C   GLU   537      16.440  30.800 -66.310  1.00  0.00
ATOM   5026  O   GLU   537      16.270  31.240 -67.450  1.00  0.00
ATOM   5027  N   LEU   538      16.470  29.470 -66.050  1.00  0.00
ATOM   5028  HN  LEU   538      16.630  29.180 -65.100  1.00  0.00
ATOM   5029  CA  LEU   538      16.290  28.430 -67.040  1.00  0.00
ATOM   5030  CB  LEU   538      17.610  27.780 -67.500  1.00  0.00
ATOM   5031  CG  LEU   538      18.480  28.700 -68.380  1.00  0.00
ATOM   5032  CD2 LEU   538      18.950  29.950 -67.620  1.00  0.00
ATOM   5033  CD1 LEU   538      17.760  29.040 -69.700  1.00  0.00
ATOM   5034  C   LEU   538      15.410  27.360 -66.450  1.00  0.00
ATOM   5035  O   LEU   538      14.980  27.460 -65.310  1.00  0.00
ATOM   5036  N   PRO   539      15.120  26.320 -67.220  1.00  0.00
ATOM   5037  CA  PRO   539      14.250  25.230 -66.820  1.00  0.00
ATOM   5038  CD  PRO   539      15.140  26.470 -68.670  1.00  0.00
ATOM   5039  CB  PRO   539      13.850  24.510 -68.100  1.00  0.00
ATOM   5040  CG  PRO   539      14.780  25.070 -69.190  1.00  0.00
ATOM   5041  C   PRO   539      14.870  24.330 -65.790  1.00  0.00
ATOM   5042  O   PRO   539      15.940  24.660 -65.290  1.00  0.00
ATOM   5043  N   LEU   540      14.180  23.220 -65.420  1.00  0.00
ATOM   5044  HN  LEU   540      13.280  23.030 -65.830  1.00  0.00
ATOM   5045  CA  LEU   540      14.720  22.330 -64.420  1.00  0.00
ATOM   5046  CB  LEU   540      13.850  22.170 -63.170  1.00  0.00
ATOM   5047  CG  LEU   540      14.480  21.210 -62.140  1.00  0.00
ATOM   5048  CD2 LEU   540      13.530  20.910 -60.980  1.00  0.00
ATOM   5049  CD1 LEU   540      15.840  21.750 -61.660  1.00  0.00
ATOM   5050  C   LEU   540      14.930  20.970 -65.020  1.00  0.00
ATOM   5051  O   LEU   540      14.120  20.490 -65.810  1.00  0.00
ATOM   5052  N   ASP   541      16.050  20.320 -64.630  1.00  0.00
ATOM   5053  HN  ASP   541      16.660  20.760 -63.960  1.00  0.00
ATOM   5054  CA  ASP   541      16.410  19.020 -65.130  1.00  0.00
ATOM   5055  CB  ASP   541      17.710  19.030 -65.960  1.00  0.00
ATOM   5056  CG  ASP   541      17.480  19.850 -67.220  1.00  0.00
ATOM   5057  OD1 ASP   541      16.300  19.940 -67.660  1.00  0.00
ATOM   5058  OD2 ASP   541      18.480  20.390 -67.760  1.00  0.00
ATOM   5059  C   ASP   541      16.690  18.110 -63.970  1.00  0.00
ATOM   5060  O   ASP   541      16.770  18.530 -62.820  1.00  0.00
ATOM   5061  N   GLU   542      16.840  16.810 -64.280  1.00  0.00
ATOM   5062  HN  GLU   542      16.780  16.530 -65.250  1.00  0.00
ATOM   5063  CA  GLU   542      17.090  15.800 -63.290  1.00  0.00
ATOM   5064  CB  GLU   542      17.210  14.410 -63.920  1.00  0.00
ATOM   5065  CG  GLU   542      17.470  13.290 -62.910  1.00  0.00
ATOM   5066  CD  GLU   542      17.850  12.050 -63.710  1.00  0.00
ATOM   5067  OE1 GLU   542      17.920  12.150 -64.960  1.00  0.00
ATOM   5068  OE2 GLU   542      18.070  10.980 -63.070  1.00  0.00
ATOM   5069  C   GLU   542      18.410  16.080 -62.630  1.00  0.00
ATOM   5070  O   GLU   542      18.530  15.990 -61.410  1.00  0.00
ATOM   5071  N   GLN   543      19.440  16.460 -63.420  1.00  0.00
ATOM   5072  HN  GLN   543      19.280  16.640 -64.400  1.00  0.00
ATOM   5073  CA  GLN   543      20.750  16.590 -62.850  1.00  0.00
ATOM   5074  CB  GLN   543      21.800  16.970 -63.900  1.00  0.00
ATOM   5075  CG  GLN   543      22.000  15.900 -64.980  1.00  0.00
ATOM   5076  CD  GLN   543      22.590  14.670 -64.310  1.00  0.00
ATOM   5077  OE1 GLN   543      22.080  14.200 -63.290  1.00  0.00
ATOM   5078  NE2 GLN   543      23.690  14.120 -64.900  1.00  0.00
ATOM   5079 HE22 GLN   543      24.070  14.540 -65.730  1.00  0.00
ATOM   5080 HE21 GLN   543      24.120  13.300 -64.490  1.00  0.00
ATOM   5081  C   GLN   543      20.770  17.640 -61.790  1.00  0.00
ATOM   5082  O   GLN   543      21.140  17.380 -60.650  1.00  0.00
ATOM   5083  N   TRP   544      20.300  18.850 -62.130  1.00  0.00
ATOM   5084  HN  TRP   544      19.910  19.010 -63.040  1.00  0.00
ATOM   5085  CA  TRP   544      20.350  19.920 -61.180  1.00  0.00
ATOM   5086  CB  TRP   544      19.850  21.260 -61.730  1.00  0.00
ATOM   5087  CG  TRP   544      19.670  22.260 -60.630  1.00  0.00
ATOM   5088  CD2 TRP   544      20.750  22.710 -59.800  1.00  0.00
ATOM   5089  CD1 TRP   544      18.540  22.830 -60.150  1.00  0.00
ATOM   5090  NE1 TRP   544      18.840  23.630 -59.070  1.00  0.00
ATOM   5091  HE1 TRP   544      18.190  24.190 -58.540  1.00  0.00
ATOM   5092  CE2 TRP   544      20.200  23.560 -58.850  1.00  0.00
ATOM   5093  CE3 TRP   544      22.080  22.420 -59.820  1.00  0.00
ATOM   5094  CZ2 TRP   544      20.990  24.130 -57.890  1.00  0.00
ATOM   5095  CZ3 TRP   544      22.880  23.020 -58.870  1.00  0.00
ATOM   5096  CH2 TRP   544      22.340  23.860 -57.920  1.00  0.00
ATOM   5097  C   TRP   544      19.520  19.580 -59.990  1.00  0.00
ATOM   5098  O   TRP   544      19.860  19.930 -58.860  1.00  0.00
ATOM   5099  N   ARG   545      18.390  18.900 -60.220  1.00  0.00
ATOM   5100  HN  ARG   545      18.170  18.610 -61.160  1.00  0.00
ATOM   5101  CA  ARG   545      17.480  18.580 -59.160  1.00  0.00
ATOM   5102  CB  ARG   545      16.270  17.790 -59.690  1.00  0.00
ATOM   5103  CG  ARG   545      15.330  17.250 -58.610  1.00  0.00
ATOM   5104  CD  ARG   545      14.300  16.250 -59.160  1.00  0.00
ATOM   5105  NE  ARG   545      15.050  15.280 -60.020  1.00  0.00
ATOM   5106  HE  ARG   545      15.910  15.580 -60.460  1.00  0.00
ATOM   5107  CZ  ARG   545      14.590  14.010 -60.220  1.00  0.00
ATOM   5108  NH1 ARG   545      13.460  13.590 -59.590  1.00  0.00
ATOM   5109 HH11 ARG   545      12.950  14.220 -58.980  1.00  0.00
ATOM   5110 HH12 ARG   545      13.120  12.650 -59.740  1.00  0.00
ATOM   5111  NH2 ARG   545      15.280  13.170 -61.040  1.00  0.00
ATOM   5112 HH21 ARG   545      16.120  13.480 -61.500  1.00  0.00
ATOM   5113 HH22 ARG   545      14.940  12.230 -61.190  1.00  0.00
ATOM   5114  C   ARG   545      18.150  17.720 -58.120  1.00  0.00
ATOM   5115  O   ARG   545      18.160  18.050 -56.940  1.00  0.00
ATOM   5116  N   GLU   546      18.760  16.600 -58.550  1.00  0.00
ATOM   5117  HN  GLU   546      18.810  16.410 -59.540  1.00  0.00
ATOM   5118  CA  GLU   546      19.350  15.680 -57.620  1.00  0.00
ATOM   5119  CB  GLU   546      19.800  14.370 -58.280  1.00  0.00
ATOM   5120  CG  GLU   546      20.690  14.560 -59.510  1.00  0.00
ATOM   5121  CD  GLU   546      22.090  14.900 -59.040  1.00  0.00
ATOM   5122  OE1 GLU   546      22.400  14.600 -57.860  1.00  0.00
ATOM   5123  OE2 GLU   546      22.860  15.470 -59.850  1.00  0.00
ATOM   5124  C   GLU   546      20.500  16.350 -56.940  1.00  0.00
ATOM   5125  O   GLU   546      20.760  16.120 -55.760  1.00  0.00
ATOM   5126  N   ALA   547      21.200  17.220 -57.680  1.00  0.00
ATOM   5127  HN  ALA   547      20.920  17.410 -58.630  1.00  0.00
ATOM   5128  CA  ALA   547      22.350  17.880 -57.150  1.00  0.00
ATOM   5129  CB  ALA   547      22.980  18.870 -58.140  1.00  0.00
ATOM   5130  C   ALA   547      21.890  18.650 -55.960  1.00  0.00
ATOM   5131  O   ALA   547      22.640  18.860 -55.010  1.00  0.00
ATOM   5132  N   PHE   548      20.660  19.180 -56.040  1.00  0.00
ATOM   5133  HN  PHE   548      20.140  19.030 -56.900  1.00  0.00
ATOM   5134  CA  PHE   548      20.010  19.930 -55.000  1.00  0.00
ATOM   5135  CB  PHE   548      18.660  20.470 -55.540  1.00  0.00
ATOM   5136  CG  PHE   548      17.750  20.900 -54.440  1.00  0.00
ATOM   5137  CD1 PHE   548      16.890  19.990 -53.850  1.00  0.00
ATOM   5138  CD2 PHE   548      17.710  22.200 -53.990  1.00  0.00
ATOM   5139  CE1 PHE   548      16.040  20.350 -52.840  1.00  0.00
ATOM   5140  CE2 PHE   548      16.860  22.560 -52.970  1.00  0.00
ATOM   5141  CZ  PHE   548      16.030  21.640 -52.390  1.00  0.00
ATOM   5142  C   PHE   548      19.690  19.110 -53.780  1.00  0.00
ATOM   5143  O   PHE   548      20.130  19.420 -52.680  1.00  0.00
ATOM   5144  N   GLN   549      18.920  18.020 -53.960  1.00  0.00
ATOM   5145  HN  GLN   549      18.720  17.680 -54.890  1.00  0.00
ATOM   5146  CA  GLN   549      18.400  17.340 -52.810  1.00  0.00
ATOM   5147  CB  GLN   549      17.410  16.210 -53.090  1.00  0.00
ATOM   5148  CG  GLN   549      16.920  15.590 -51.780  1.00  0.00
ATOM   5149  CD  GLN   549      15.940  14.460 -52.060  1.00  0.00
ATOM   5150  OE1 GLN   549      15.730  14.060 -53.200  1.00  0.00
ATOM   5151  NE2 GLN   549      15.310  13.930 -50.970  1.00  0.00
ATOM   5152 HE22 GLN   549      15.510  14.280 -50.050  1.00  0.00
ATOM   5153 HE21 GLN   549      14.650  13.180 -51.090  1.00  0.00
ATOM   5154  C   GLN   549      19.490  16.740 -51.990  1.00  0.00
ATOM   5155  O   GLN   549      19.450  16.820 -50.760  1.00  0.00
ATOM   5156  N   THR   550      20.500  16.160 -52.650  1.00  0.00
ATOM   5157  HN  THR   550      20.550  16.230 -53.660  1.00  0.00
ATOM   5158  CA  THR   550      21.530  15.450 -51.950  1.00  0.00
ATOM   5159  CB  THR   550      22.630  14.990 -52.860  1.00  0.00
ATOM   5160  OG1 THR   550      22.100  14.150 -53.880  1.00  0.00
ATOM   5161  HG1 THR   550      22.820  13.870 -54.460  1.00  0.00
ATOM   5162  CG2 THR   550      23.670  14.220 -52.030  1.00  0.00
ATOM   5163  C   THR   550      22.140  16.360 -50.940  1.00  0.00
ATOM   5164  O   THR   550      22.320  15.980 -49.780  1.00  0.00
ATOM   5165  N   ALA   551      22.430  17.600 -51.330  1.00  0.00
ATOM   5166  HN  ALA   551      22.210  17.880 -52.280  1.00  0.00
ATOM   5167  CA  ALA   551      23.040  18.540 -50.440  1.00  0.00
ATOM   5168  CB  ALA   551      23.300  19.910 -51.100  1.00  0.00
ATOM   5169  C   ALA   551      22.130  18.750 -49.280  1.00  0.00
ATOM   5170  O   ALA   551      22.570  18.910 -48.150  1.00  0.00
ATOM   5171  N   TYR   552      20.810  18.750 -49.540  1.00  0.00
ATOM   5172  HN  TYR   552      20.490  18.610 -50.490  1.00  0.00
ATOM   5173  CA  TYR   552      19.830  18.950 -48.500  1.00  0.00
ATOM   5174  CB  TYR   552      18.430  18.750 -49.100  1.00  0.00
ATOM   5175  CG  TYR   552      17.380  18.390 -48.100  1.00  0.00
ATOM   5176  CD1 TYR   552      16.630  19.330 -47.430  1.00  0.00
ATOM   5177  CD2 TYR   552      17.150  17.050 -47.850  1.00  0.00
ATOM   5178  CE1 TYR   552      15.680  18.930 -46.520  1.00  0.00
ATOM   5179  CE2 TYR   552      16.190  16.650 -46.940  1.00  0.00
ATOM   5180  CZ  TYR   552      15.450  17.600 -46.280  1.00  0.00
ATOM   5181  OH  TYR   552      14.470  17.200 -45.350  1.00  0.00
ATOM   5182  HH  TYR   552      14.440  16.240 -45.310  1.00  0.00
ATOM   5183  C   TYR   552      20.080  17.900 -47.470  1.00  0.00
ATOM   5184  O   TYR   552      20.130  18.190 -46.270  1.00  0.00
ATOM   5185  N   LEU   553      20.260  16.640 -47.910  1.00  0.00
ATOM   5186  HN  LEU   553      20.240  16.450 -48.900  1.00  0.00
ATOM   5187  CA  LEU   553      20.480  15.580 -46.980  1.00  0.00
ATOM   5188  CB  LEU   553      20.590  14.210 -47.670  1.00  0.00
ATOM   5189  CG  LEU   553      19.300  13.780 -48.380  1.00  0.00
ATOM   5190  CD2 LEU   553      18.090  13.840 -47.420  1.00  0.00
ATOM   5191  CD1 LEU   553      19.450  12.400 -49.050  1.00  0.00
ATOM   5192  C   LEU   553      21.780  15.820 -46.280  1.00  0.00
ATOM   5193  O   LEU   553      21.870  15.670 -45.060  1.00  0.00
ATOM   5194  N   SER   554      22.800  16.250 -47.050  1.00  0.00
ATOM   5195  HN  SER   554      22.660  16.430 -48.030  1.00  0.00
ATOM   5196  CA  SER   554      24.100  16.440 -46.460  1.00  0.00
ATOM   5197  CB  SER   554      25.120  17.020 -47.450  1.00  0.00
ATOM   5198  OG  SER   554      25.340  16.110 -48.520  1.00  0.00
ATOM   5199  HG  SER   554      25.980  16.480 -49.130  1.00  0.00
ATOM   5200  C   SER   554      23.950  17.420 -45.350  1.00  0.00
ATOM   5201  O   SER   554      24.300  17.150 -44.210  1.00  0.00
ATOM   5202  N   LEU   555      23.370  18.590 -45.640  1.00  0.00
ATOM   5203  HN  LEU   555      23.000  18.770 -46.560  1.00  0.00
ATOM   5204  CA  LEU   555      23.280  19.590 -44.620  1.00  0.00
ATOM   5205  CB  LEU   555      22.760  20.950 -45.120  1.00  0.00
ATOM   5206  CG  LEU   555      23.750  21.690 -46.030  1.00  0.00
ATOM   5207  CD2 LEU   555      25.140  21.770 -45.360  1.00  0.00
ATOM   5208  CD1 LEU   555      23.220  23.060 -46.460  1.00  0.00
ATOM   5209  C   LEU   555      22.390  19.130 -43.500  1.00  0.00
ATOM   5210  O   LEU   555      22.580  19.560 -42.370  1.00  0.00
ATOM   5211  N   GLY   556      21.330  18.350 -43.800  1.00  0.00
ATOM   5212  HN  GLY   556      21.150  18.070 -44.760  1.00  0.00
ATOM   5213  CA  GLY   556      20.460  17.910 -42.740  1.00  0.00
ATOM   5214  C   GLY   556      21.100  16.890 -41.830  1.00  0.00
ATOM   5215  O   GLY   556      21.090  17.050 -40.610  1.00  0.00
ATOM   5216  N   GLY   557      21.600  15.780 -42.420  1.00  0.00
ATOM   5217  HN  GLY   557      21.540  15.730 -43.430  1.00  0.00
ATOM   5218  CA  GLY   557      22.200  14.660 -41.740  1.00  0.00
ATOM   5219  C   GLY   557      23.620  14.900 -41.290  1.00  0.00
ATOM   5220  O   GLY   557      24.040  14.410 -40.240  1.00  0.00
ATOM   5221  N   LEU   558      24.400  15.650 -42.080  1.00  0.00
ATOM   5222  HN  LEU   558      23.990  16.140 -42.870  1.00  0.00
ATOM   5223  CA  LEU   558      25.810  15.770 -41.840  1.00  0.00
ATOM   5224  CB  LEU   558      26.610  16.600 -42.860  1.00  0.00
ATOM   5225  CG  LEU   558      26.740  15.920 -44.240  1.00  0.00
ATOM   5226  CD2 LEU   558      27.300  14.490 -44.110  1.00  0.00
ATOM   5227  CD1 LEU   558      27.560  16.790 -45.210  1.00  0.00
ATOM   5228  C   LEU   558      26.070  16.350 -40.500  1.00  0.00
ATOM   5229  O   LEU   558      25.170  16.820 -39.810  1.00  0.00
ATOM   5230  N   GLY   559      27.360  16.300 -40.110  1.00  0.00
ATOM   5231  HN  GLY   559      28.050  15.980 -40.780  1.00  0.00
ATOM   5232  CA  GLY   559      27.820  16.680 -38.810  1.00  0.00
ATOM   5233  C   GLY   559      27.370  18.080 -38.540  1.00  0.00
ATOM   5234  O   GLY   559      26.980  18.380 -37.410  1.00  0.00
ATOM   5235  N   GLU   560      27.430  18.980 -39.530  1.00  0.00
ATOM   5236  HN  GLU   560      27.820  18.740 -40.430  1.00  0.00
ATOM   5237  CA  GLU   560      26.930  20.290 -39.250  1.00  0.00
ATOM   5238  CB  GLU   560      27.430  21.370 -40.220  1.00  0.00
ATOM   5239  CG  GLU   560      28.860  21.850 -39.940  1.00  0.00
ATOM   5240  CD  GLU   560      28.750  23.030 -38.980  1.00  0.00
ATOM   5241  OE1 GLU   560      27.900  22.970 -38.060  1.00  0.00
ATOM   5242  OE2 GLU   560      29.520  24.020 -39.170  1.00  0.00
ATOM   5243  C   GLU   560      25.440  20.210 -39.430  1.00  0.00
ATOM   5244  O   GLU   560      24.930  20.530 -40.500  1.00  0.00
ATOM   5245  N   ARG   561      24.720  19.830 -38.360  1.00  0.00
ATOM   5246  HN  ARG   561      25.190  19.650 -37.480  1.00  0.00
ATOM   5247  CA  ARG   561      23.300  19.670 -38.450  1.00  0.00
ATOM   5248  CB  ARG   561      22.650  19.210 -37.130  1.00  0.00
ATOM   5249  CG  ARG   561      21.120  19.180 -37.160  1.00  0.00
ATOM   5250  CD  ARG   561      20.510  20.480 -36.650  1.00  0.00
ATOM   5251  NE  ARG   561      21.050  20.680 -35.270  1.00  0.00
ATOM   5252  HE  ARG   561      21.000  19.930 -34.600  1.00  0.00
ATOM   5253  CZ  ARG   561      21.620  21.870 -34.930  1.00  0.00
ATOM   5254  NH1 ARG   561      21.660  22.900 -35.830  1.00  0.00
ATOM   5255 HH11 ARG   561      21.250  22.790 -36.740  1.00  0.00
ATOM   5256 HH12 ARG   561      22.100  23.780 -35.570  1.00  0.00
ATOM   5257  NH2 ARG   561      22.180  22.010 -33.690  1.00  0.00
ATOM   5258 HH21 ARG   561      22.160  21.240 -33.040  1.00  0.00
ATOM   5259 HH22 ARG   561      22.620  22.890 -33.430  1.00  0.00
ATOM   5260  C   ARG   561      22.720  20.990 -38.820  1.00  0.00
ATOM   5261  O   ARG   561      22.940  22.000 -38.140  1.00  0.00
ATOM   5262  N   VAL   562      21.920  21.000 -39.900  1.00  0.00
ATOM   5263  HN  VAL   562      21.690  20.110 -40.330  1.00  0.00
ATOM   5264  CA  VAL   562      21.380  22.180 -40.480  1.00  0.00
ATOM   5265  CB  VAL   562      21.890  22.360 -41.880  1.00  0.00
ATOM   5266  CG1 VAL   562      20.970  23.350 -42.600  1.00  0.00
ATOM   5267  CG2 VAL   562      23.360  22.790 -41.810  1.00  0.00
ATOM   5268  C   VAL   562      19.900  22.070 -40.610  1.00  0.00
ATOM   5269  O   VAL   562      19.360  21.010 -40.920  1.00  0.00
ATOM   5270  N   LEU   563      19.210  23.210 -40.420  1.00  0.00
ATOM   5271  HN  LEU   563      19.690  24.080 -40.250  1.00  0.00
ATOM   5272  CA  LEU   563      17.790  23.190 -40.460  1.00  0.00
ATOM   5273  CB  LEU   563      17.150  23.470 -39.090  1.00  0.00
ATOM   5274  CG  LEU   563      17.470  22.400 -38.030  1.00  0.00
ATOM   5275  CD2 LEU   563      17.150  20.990 -38.550  1.00  0.00
ATOM   5276  CD1 LEU   563      16.790  22.710 -36.690  1.00  0.00
ATOM   5277  C   LEU   563      17.220  24.180 -41.420  1.00  0.00
ATOM   5278  O   LEU   563      17.880  24.750 -42.290  1.00  0.00
ATOM   5279  N   GLY   564      15.920  24.350 -41.190  1.00  0.00
ATOM   5280  HN  GLY   564      15.580  23.930 -40.330  1.00  0.00
ATOM   5281  CA  GLY   564      14.920  25.030 -41.930  1.00  0.00
ATOM   5282  C   GLY   564      13.960  23.910 -41.920  1.00  0.00
ATOM   5283  O   GLY   564      13.870  23.210 -40.910  1.00  0.00
ATOM   5284  N   PHE   565      13.200  23.660 -42.990  1.00  0.00
ATOM   5285  HN  PHE   565      13.070  24.290 -43.770  1.00  0.00
ATOM   5286  CA  PHE   565      12.600  22.380 -42.850  1.00  0.00
ATOM   5287  CB  PHE   565      11.340  22.180 -43.710  1.00  0.00
ATOM   5288  CG  PHE   565      10.260  22.950 -43.030  1.00  0.00
ATOM   5289  CD1 PHE   565      10.110  24.300 -43.220  1.00  0.00
ATOM   5290  CD2 PHE   565       9.390  22.300 -42.180  1.00  0.00
ATOM   5291  CE1 PHE   565       9.110  25.000 -42.580  1.00  0.00
ATOM   5292  CE2 PHE   565       8.390  22.990 -41.530  1.00  0.00
ATOM   5293  CZ  PHE   565       8.250  24.350 -41.740  1.00  0.00
ATOM   5294  C   PHE   565      13.700  21.480 -43.310  1.00  0.00
ATOM   5295  O   PHE   565      13.750  21.060 -44.460  1.00  0.00
ATOM   5296  N   CYS   566      14.610  21.150 -42.370  1.00  0.00
ATOM   5297  HN  CYS   566      14.450  21.420 -41.410  1.00  0.00
ATOM   5298  CA  CYS   566      15.800  20.420 -42.700  1.00  0.00
ATOM   5299  CB  CYS   566      15.520  18.990 -43.210  1.00  0.00
ATOM   5300  SG  CYS   566      14.780  17.930 -41.930  1.00  0.00
ATOM   5301  C   CYS   566      16.460  21.190 -43.790  1.00  0.00
ATOM   5302  O   CYS   566      16.940  20.600 -44.760  1.00  0.00
ATOM   5303  N   GLN   567      16.520  22.530 -43.620  1.00  0.00
ATOM   5304  HN  GLN   567      16.240  22.890 -42.720  1.00  0.00
ATOM   5305  CA  GLN   567      16.940  23.490 -44.600  1.00  0.00
ATOM   5306  CB  GLN   567      17.780  22.990 -45.790  1.00  0.00
ATOM   5307  CG  GLN   567      19.160  22.460 -45.410  1.00  0.00
ATOM   5308  CD  GLN   567      19.850  22.010 -46.700  1.00  0.00
ATOM   5309  OE1 GLN   567      20.550  21.010 -46.750  1.00  0.00
ATOM   5310  NE2 GLN   567      19.630  22.800 -47.780  1.00  0.00
ATOM   5311 HE22 GLN   567      19.050  23.620 -47.700  1.00  0.00
ATOM   5312 HE21 GLN   567      20.060  22.570 -48.670  1.00  0.00
ATOM   5313  C   GLN   567      15.650  24.020 -45.140  1.00  0.00
ATOM   5314  O   GLN   567      14.640  23.330 -45.150  1.00  0.00
ATOM   5315  N   LEU   568      15.640  25.290 -45.590  1.00  0.00
ATOM   5316  HN  LEU   568      16.500  25.840 -45.580  1.00  0.00
ATOM   5317  CA  LEU   568      14.430  25.870 -46.090  1.00  0.00
ATOM   5318  CB  LEU   568      14.090  27.210 -45.420  1.00  0.00
ATOM   5319  CG  LEU   568      12.790  27.860 -45.920  1.00  0.00
ATOM   5320  CD2 LEU   568      12.650  29.310 -45.410  1.00  0.00
ATOM   5321  CD1 LEU   568      11.560  27.000 -45.580  1.00  0.00
ATOM   5322  C   LEU   568      14.630  26.120 -47.550  1.00  0.00
ATOM   5323  O   LEU   568      15.620  26.740 -47.950  1.00  0.00
ATOM   5324  N   TYR   569      13.690  25.650 -48.390  1.00  0.00
ATOM   5325  HN  TYR   569      12.890  25.190 -47.990  1.00  0.00
ATOM   5326  CA  TYR   569      13.770  25.780 -49.810  1.00  0.00
ATOM   5327  CB  TYR   569      13.030  24.630 -50.470  1.00  0.00
ATOM   5328  CG  TYR   569      13.090  24.590 -51.960  1.00  0.00
ATOM   5329  CD1 TYR   569      12.270  25.380 -52.730  1.00  0.00
ATOM   5330  CD2 TYR   569      13.940  23.700 -52.590  1.00  0.00
ATOM   5331  CE1 TYR   569      12.310  25.310 -54.110  1.00  0.00
ATOM   5332  CE2 TYR   569      13.980  23.630 -53.950  1.00  0.00
ATOM   5333  CZ  TYR   569      13.160  24.430 -54.710  1.00  0.00
ATOM   5334  OH  TYR   569      13.220  24.340 -56.120  1.00  0.00
ATOM   5335  HH  TYR   569      13.870  23.670 -56.370  1.00  0.00
ATOM   5336  C   TYR   569      13.120  27.070 -50.210  1.00  0.00
ATOM   5337  O   TYR   569      12.070  27.430 -49.690  1.00  0.00
ATOM   5338  N   LEU   570      13.760  27.820 -51.120  1.00  0.00
ATOM   5339  HN  LEU   570      14.640  27.510 -51.510  1.00  0.00
ATOM   5340  CA  LEU   570      13.190  29.060 -51.540  1.00  0.00
ATOM   5341  CB  LEU   570      14.090  30.260 -51.200  1.00  0.00
ATOM   5342  CG  LEU   570      14.330  30.420 -49.690  1.00  0.00
ATOM   5343  CD2 LEU   570      13.030  30.300 -48.890  1.00  0.00
ATOM   5344  CD1 LEU   570      15.110  31.710 -49.380  1.00  0.00
ATOM   5345  C   LEU   570      13.000  29.040 -53.020  1.00  0.00
ATOM   5346  O   LEU   570      13.920  28.720 -53.780  1.00  0.00
ATOM   5347  N   SER   571      11.780  29.380 -53.470  1.00  0.00
ATOM   5348  HN  SER   571      11.060  29.620 -52.800  1.00  0.00
ATOM   5349  CA  SER   571      11.470  29.420 -54.870  1.00  0.00
ATOM   5350  CB  SER   571      10.740  28.170 -55.380  1.00  0.00
ATOM   5351  OG  SER   571       9.430  28.130 -54.850  1.00  0.00
ATOM   5352  HG  SER   571       8.970  27.350 -55.170  1.00  0.00
ATOM   5353  C   SER   571      10.550  30.580 -55.060  1.00  0.00
ATOM   5354  O   SER   571      10.120  31.200 -54.090  1.00  0.00
ATOM   5355  N   GLU   572      10.260  30.950 -56.330  1.00  0.00
ATOM   5356  HN  GLU   572      10.690  30.490 -57.120  1.00  0.00
ATOM   5357  CA  GLU   572       9.320  32.020 -56.530  1.00  0.00
ATOM   5358  CB  GLU   572       9.970  33.380 -56.840  1.00  0.00
ATOM   5359  CG  GLU   572      10.740  33.410 -58.150  1.00  0.00
ATOM   5360  CD  GLU   572      11.280  34.820 -58.350  1.00  0.00
ATOM   5361  OE1 GLU   572      10.870  35.730 -57.570  1.00  0.00
ATOM   5362  OE2 GLU   572      12.110  35.010 -59.270  1.00  0.00
ATOM   5363  C   GLU   572       8.460  31.680 -57.690  1.00  0.00
ATOM   5364  O   GLU   572       8.930  31.220 -58.730  1.00  0.00
ATOM   5365  N   LYS   573       7.140  31.880 -57.530  1.00  0.00
ATOM   5366  HN  LYS   573       6.770  32.200 -56.640  1.00  0.00
ATOM   5367  CA  LYS   573       6.270  31.660 -58.630  1.00  0.00
ATOM   5368  CB  LYS   573       4.880  31.180 -58.200  1.00  0.00
ATOM   5369  CG  LYS   573       4.170  32.080 -57.190  1.00  0.00
ATOM   5370  CD  LYS   573       2.710  31.700 -56.970  1.00  0.00
ATOM   5371  CE  LYS   573       2.440  30.210 -57.180  1.00  0.00
ATOM   5372  NZ  LYS   573       2.300  29.920 -58.630  1.00  0.00
ATOM   5373  HZ1 LYS   573       1.530  30.460 -59.010  1.00  0.00
ATOM   5374  HZ2 LYS   573       3.160  30.170 -59.110  1.00  0.00
ATOM   5375  HZ3 LYS   573       2.120  28.930 -58.760  1.00  0.00
ATOM   5376  C   LYS   573       6.160  32.970 -59.280  1.00  0.00
ATOM   5377  O   LYS   573       5.630  33.920 -58.690  1.00  0.00
ATOM   5378  N   ASP   574       6.680  33.040 -60.520  1.00  0.00
ATOM   5379  HN  ASP   574       7.040  32.200 -60.950  1.00  0.00
ATOM   5380  CA  ASP   574       6.750  34.270 -61.230  1.00  0.00
ATOM   5381  CB  ASP   574       7.370  34.110 -62.630  1.00  0.00
ATOM   5382  CG  ASP   574       8.820  33.700 -62.430  1.00  0.00
ATOM   5383  OD1 ASP   574       9.450  34.230 -61.480  1.00  0.00
ATOM   5384  OD2 ASP   574       9.330  32.860 -63.230  1.00  0.00
ATOM   5385  C   ASP   574       5.350  34.800 -61.390  1.00  0.00
ATOM   5386  O   ASP   574       5.040  35.880 -60.880  1.00  0.00
ATOM   5387  N   TYR   575       4.450  34.020 -62.010  1.00  0.00
ATOM   5388  HN  TYR   575       4.680  33.090 -62.340  1.00  0.00
ATOM   5389  CA  TYR   575       3.130  34.570 -62.200  1.00  0.00
ATOM   5390  CB  TYR   575       2.640  34.560 -63.660  1.00  0.00
ATOM   5391  CG  TYR   575       3.470  35.480 -64.470  1.00  0.00
ATOM   5392  CD1 TYR   575       3.120  36.810 -64.600  1.00  0.00
ATOM   5393  CD2 TYR   575       4.600  35.030 -65.110  1.00  0.00
ATOM   5394  CE1 TYR   575       3.880  37.670 -65.350  1.00  0.00
ATOM   5395  CE2 TYR   575       5.370  35.890 -65.870  1.00  0.00
ATOM   5396  CZ  TYR   575       5.010  37.210 -65.990  1.00  0.00
ATOM   5397  OH  TYR   575       5.800  38.090 -66.760  1.00  0.00
ATOM   5398  HH  TYR   575       6.540  37.610 -67.140  1.00  0.00
ATOM   5399  C   TYR   575       2.130  33.790 -61.420  1.00  0.00
ATOM   5400  O   TYR   575       1.730  32.690 -61.810  1.00  0.00
ATOM   5401  N   PRO   576       1.740  34.340 -60.310  1.00  0.00
ATOM   5402  CA  PRO   576       0.740  33.690 -59.500  1.00  0.00
ATOM   5403  CD  PRO   576       2.700  35.070 -59.500  1.00  0.00
ATOM   5404  CB  PRO   576       1.100  34.020 -58.050  1.00  0.00
ATOM   5405  CG  PRO   576       2.020  35.250 -58.140  1.00  0.00
ATOM   5406  C   PRO   576      -0.690  34.080 -59.790  1.00  0.00
ATOM   5407  O   PRO   576      -0.930  35.130 -60.380  1.00  0.00
ATOM   5408  N   PRO   577      -1.600  33.210 -59.410  1.00  0.00
ATOM   5409  CA  PRO   577      -3.040  33.450 -59.470  1.00  0.00
ATOM   5410  CD  PRO   577      -1.300  31.810 -59.690  1.00  0.00
ATOM   5411  CB  PRO   577      -3.700  32.090 -59.690  1.00  0.00
ATOM   5412  CG  PRO   577      -2.580  31.220 -60.280  1.00  0.00
ATOM   5413  C   PRO   577      -3.470  34.040 -58.140  1.00  0.00
ATOM   5414  O   PRO   577      -2.590  34.450 -57.380  1.00  0.00
ATOM   5415  N   GLY   578      -4.790  34.120 -57.810  1.00  0.00
ATOM   5416  HN  GLY   578      -5.510  33.850 -58.470  1.00  0.00
ATOM   5417  CA  GLY   578      -5.120  34.610 -56.490  1.00  0.00
ATOM   5418  C   GLY   578      -6.490  34.160 -56.000  1.00  0.00
ATOM   5419  O   GLY   578      -7.510  34.530 -56.570  1.00  0.00
ATOM   5420  N   TYR   579      -6.530  33.340 -54.900  1.00  0.00
ATOM   5421  HN  TYR   579      -5.650  32.960 -54.580  1.00  0.00
ATOM   5422  CA  TYR   579      -7.730  32.980 -54.170  1.00  0.00
ATOM   5423  CB  TYR   579      -8.300  31.600 -54.550  1.00  0.00
ATOM   5424  CG  TYR   579      -8.870  31.680 -55.930  1.00  0.00
ATOM   5425  CD1 TYR   579      -8.050  31.590 -57.020  1.00  0.00
ATOM   5426  CD2 TYR   579     -10.220  31.840 -56.110  1.00  0.00
ATOM   5427  CE1 TYR   579      -8.570  31.660 -58.290  1.00  0.00
ATOM   5428  CE2 TYR   579     -10.750  31.910 -57.380  1.00  0.00
ATOM   5429  CZ  TYR   579      -9.920  31.820 -58.470  1.00  0.00
ATOM   5430  OH  TYR   579     -10.460  31.900 -59.770  1.00  0.00
ATOM   5431  HH  TYR   579     -11.410  32.010 -59.720  1.00  0.00
ATOM   5432  C   TYR   579      -7.360  32.900 -52.710  1.00  0.00
ATOM   5433  O   TYR   579      -6.730  31.940 -52.270  1.00  0.00
ATOM   5434  N   ALA   580      -7.760  33.910 -51.910  1.00  0.00
ATOM   5435  HN  ALA   580      -8.360  34.610 -52.320  1.00  0.00
ATOM   5436  CA  ALA   580      -7.410  34.070 -50.520  1.00  0.00
ATOM   5437  CB  ALA   580      -7.740  35.470 -49.990  1.00  0.00
ATOM   5438  C   ALA   580      -8.010  33.090 -49.530  1.00  0.00
ATOM   5439  O   ALA   580      -7.350  32.700 -48.570  1.00  0.00
ATOM   5440  N   PHE   581      -9.280  32.700 -49.720  1.00  0.00
ATOM   5441  HN  PHE   581      -9.710  32.890 -50.610  1.00  0.00
ATOM   5442  CA  PHE   581     -10.050  32.010 -48.710  1.00  0.00
ATOM   5443  CB  PHE   581     -11.500  31.800 -49.160  1.00  0.00
ATOM   5444  CG  PHE   581     -12.080  33.140 -49.500  1.00  0.00
ATOM   5445  CD1 PHE   581     -11.940  33.650 -50.780  1.00  0.00
ATOM   5446  CD2 PHE   581     -12.740  33.880 -48.560  1.00  0.00
ATOM   5447  CE1 PHE   581     -12.470  34.880 -51.100  1.00  0.00
ATOM   5448  CE2 PHE   581     -13.270  35.110 -48.870  1.00  0.00
ATOM   5449  CZ  PHE   581     -13.130  35.610 -50.150  1.00  0.00
ATOM   5450  C   PHE   581      -9.550  30.660 -48.300  1.00  0.00
ATOM   5451  O   PHE   581      -9.450  30.370 -47.100  1.00  0.00
ATOM   5452  N   ASP   582      -9.220  29.770 -49.260  1.00  0.00
ATOM   5453  HN  ASP   582      -9.130  30.070 -50.220  1.00  0.00
ATOM   5454  CA  ASP   582      -8.990  28.400 -48.900  1.00  0.00
ATOM   5455  CB  ASP   582      -9.510  27.430 -49.970  1.00  0.00
ATOM   5456  CG  ASP   582     -11.000  27.660 -50.090  1.00  0.00
ATOM   5457  OD1 ASP   582     -11.610  28.080 -49.060  1.00  0.00
ATOM   5458  OD2 ASP   582     -11.560  27.440 -51.200  1.00  0.00
ATOM   5459  C   ASP   582      -7.530  28.090 -48.730  1.00  0.00
ATOM   5460  O   ASP   582      -6.750  28.190 -49.680  1.00  0.00
ATOM   5461  N   VAL   583      -7.150  27.670 -47.510  1.00  0.00
ATOM   5462  HN  VAL   583      -7.850  27.590 -46.790  1.00  0.00
ATOM   5463  CA  VAL   583      -5.800  27.330 -47.200  1.00  0.00
ATOM   5464  CB  VAL   583      -5.630  26.930 -45.760  1.00  0.00
ATOM   5465  CG1 VAL   583      -4.170  26.500 -45.520  1.00  0.00
ATOM   5466  CG2 VAL   583      -6.080  28.100 -44.870  1.00  0.00
ATOM   5467  C   VAL   583      -5.400  26.150 -48.040  1.00  0.00
ATOM   5468  O   VAL   583      -4.260  26.050 -48.480  1.00  0.00
ATOM   5469  N   GLU   584      -6.350  25.220 -48.270  1.00  0.00
ATOM   5470  HN  GLU   584      -7.280  25.380 -47.900  1.00  0.00
ATOM   5471  CA  GLU   584      -6.090  24.030 -49.020  1.00  0.00
ATOM   5472  CB  GLU   584      -7.310  23.100 -49.090  1.00  0.00
ATOM   5473  CG  GLU   584      -7.690  22.480 -47.740  1.00  0.00
ATOM   5474  CD  GLU   584      -8.910  21.590 -47.950  1.00  0.00
ATOM   5475  OE1 GLU   584      -9.050  21.040 -49.080  1.00  0.00
ATOM   5476  OE2 GLU   584      -9.700  21.430 -46.980  1.00  0.00
ATOM   5477  C   GLU   584      -5.720  24.410 -50.420  1.00  0.00
ATOM   5478  O   GLU   584      -4.900  23.760 -51.060  1.00  0.00
ATOM   5479  N   ALA   585      -6.340  25.490 -50.920  1.00  0.00
ATOM   5480  HN  ALA   585      -6.970  26.000 -50.320  1.00  0.00
ATOM   5481  CA  ALA   585      -6.160  25.950 -52.260  1.00  0.00
ATOM   5482  CB  ALA   585      -7.010  27.180 -52.590  1.00  0.00
ATOM   5483  C   ALA   585      -4.730  26.320 -52.470  1.00  0.00
ATOM   5484  O   ALA   585      -4.190  26.070 -53.540  1.00  0.00
ATOM   5485  N   MET   586      -4.030  26.860 -51.460  1.00  0.00
ATOM   5486  HN  MET   586      -4.430  26.840 -50.530  1.00  0.00
ATOM   5487  CA  MET   586      -2.740  27.460 -51.650  1.00  0.00
ATOM   5488  CB  MET   586      -2.090  27.870 -50.320  1.00  0.00
ATOM   5489  CG  MET   586      -0.710  28.500 -50.490  1.00  0.00
ATOM   5490  SD  MET   586       0.090  29.000 -48.940  1.00  0.00
ATOM   5491  CE  MET   586       0.490  27.320 -48.370  1.00  0.00
ATOM   5492  C   MET   586      -1.770  26.540 -52.330  1.00  0.00
ATOM   5493  O   MET   586      -1.050  26.970 -53.230  1.00  0.00
ATOM   5494  N   ASN   587      -1.720  25.260 -51.940  1.00  0.00
ATOM   5495  HN  ASN   587      -2.380  24.910 -51.260  1.00  0.00
ATOM   5496  CA  ASN   587      -0.720  24.370 -52.480  1.00  0.00
ATOM   5497  CB  ASN   587      -0.860  22.930 -51.930  1.00  0.00
ATOM   5498  CG  ASN   587       0.240  22.040 -52.490  1.00  0.00
ATOM   5499  OD1 ASN   587       0.330  21.830 -53.700  1.00  0.00
ATOM   5500  ND2 ASN   587       1.090  21.490 -51.590  1.00  0.00
ATOM   5501 HD22 ASN   587       0.970  21.680 -50.600  1.00  0.00
ATOM   5502 HD21 ASN   587       1.830  20.890 -51.900  1.00  0.00
ATOM   5503  C   ASN   587      -0.830  24.300 -53.970  1.00  0.00
ATOM   5504  O   ASN   587       0.180  24.410 -54.680  1.00  0.00
ATOM   5505  N   PHE   588      -2.060  24.150 -54.510  1.00  0.00
ATOM   5506  HN  PHE   588      -2.870  24.130 -53.910  1.00  0.00
ATOM   5507  CA  PHE   588      -2.190  24.000 -55.930  1.00  0.00
ATOM   5508  CB  PHE   588      -3.640  23.720 -56.390  1.00  0.00
ATOM   5509  CG  PHE   588      -4.120  22.440 -55.780  1.00  0.00
ATOM   5510  CD1 PHE   588      -4.540  22.420 -54.470  1.00  0.00
ATOM   5511  CD2 PHE   588      -4.180  21.280 -56.510  1.00  0.00
ATOM   5512  CE1 PHE   588      -5.000  21.260 -53.900  1.00  0.00
ATOM   5513  CE2 PHE   588      -4.630  20.110 -55.940  1.00  0.00
ATOM   5514  CZ  PHE   588      -5.040  20.100 -54.630  1.00  0.00
ATOM   5515  C   PHE   588      -1.680  25.260 -56.570  1.00  0.00
ATOM   5516  O   PHE   588      -0.880  25.180 -57.500  1.00  0.00
ATOM   5517  N   PRO   589      -2.090  26.420 -56.120  1.00  0.00
ATOM   5518  CA  PRO   589      -1.480  27.550 -56.710  1.00  0.00
ATOM   5519  CD  PRO   589      -3.510  26.710 -56.150  1.00  0.00
ATOM   5520  CB  PRO   589      -2.240  28.780 -56.200  1.00  0.00
ATOM   5521  CG  PRO   589      -3.590  28.190 -55.740  1.00  0.00
ATOM   5522  C   PRO   589       0.000  27.600 -56.550  1.00  0.00
ATOM   5523  O   PRO   589       0.640  28.160 -57.440  1.00  0.00
ATOM   5524  N   THR   590       0.590  27.030 -55.480  1.00  0.00
ATOM   5525  HN  THR   590       0.050  26.550 -54.770  1.00  0.00
ATOM   5526  CA  THR   590       2.010  27.140 -55.410  1.00  0.00
ATOM   5527  CB  THR   590       2.540  27.110 -54.000  1.00  0.00
ATOM   5528  OG1 THR   590       3.950  27.220 -54.010  1.00  0.00
ATOM   5529  HG1 THR   590       4.280  27.200 -53.110  1.00  0.00
ATOM   5530  CG2 THR   590       2.090  25.820 -53.290  1.00  0.00
ATOM   5531  C   THR   590       2.620  26.030 -56.210  1.00  0.00
ATOM   5532  O   THR   590       3.220  25.100 -55.680  1.00  0.00
ATOM   5533  N   SER   591       2.500  26.160 -57.540  1.00  0.00
ATOM   5534  HN  SER   591       2.000  26.960 -57.900  1.00  0.00
ATOM   5535  CA  SER   591       3.040  25.220 -58.470  1.00  0.00
ATOM   5536  CB  SER   591       1.980  24.400 -59.220  1.00  0.00
ATOM   5537  OG  SER   591       1.340  23.490 -58.330  1.00  0.00
ATOM   5538  HG  SER   591       0.680  22.990 -58.820  1.00  0.00
ATOM   5539  C   SER   591       3.750  26.020 -59.500  1.00  0.00
ATOM   5540  O   SER   591       3.760  27.250 -59.440  1.00  0.00
ATOM   5541  N   GLY   592       4.420  25.330 -60.450  1.00  0.00
ATOM   5542  HN  GLY   592       4.470  24.320 -60.400  1.00  0.00
ATOM   5543  CA  GLY   592       5.070  26.010 -61.540  1.00  0.00
ATOM   5544  C   GLY   592       6.030  27.000 -60.960  1.00  0.00
ATOM   5545  O   GLY   592       6.070  28.160 -61.380  1.00  0.00
ATOM   5546  N   LEU   593       6.810  26.560 -59.970  1.00  0.00
ATOM   5547  HN  LEU   593       6.780  25.580 -59.720  1.00  0.00
ATOM   5548  CA  LEU   593       7.690  27.420 -59.220  1.00  0.00
ATOM   5549  CB  LEU   593       7.850  26.900 -57.790  1.00  0.00
ATOM   5550  CG  LEU   593       6.490  26.760 -57.080  1.00  0.00
ATOM   5551  CD2 LEU   593       5.770  28.120 -57.020  1.00  0.00
ATOM   5552  CD1 LEU   593       6.630  26.100 -55.710  1.00  0.00
ATOM   5553  C   LEU   593       9.050  27.540 -59.850  1.00  0.00
ATOM   5554  O   LEU   593       9.380  26.850 -60.820  1.00  0.00
ATOM   5555  N   SER   594       9.870  28.490 -59.330  1.00  0.00
ATOM   5556  HN  SER   594       9.510  29.090 -58.600  1.00  0.00
ATOM   5557  CA  SER   594      11.230  28.670 -59.770  1.00  0.00
ATOM   5558  CB  SER   594      11.460  30.030 -60.440  1.00  0.00
ATOM   5559  OG  SER   594      10.630  30.170 -61.580  1.00  0.00
ATOM   5560  HG  SER   594      10.780  31.020 -61.990  1.00  0.00
ATOM   5561  C   SER   594      12.110  28.630 -58.540  1.00  0.00
ATOM   5562  O   SER   594      11.970  29.470 -57.650  1.00  0.00
ATOM   5563  N   PHE   595      13.050  27.660 -58.470  1.00  0.00
ATOM   5564  HN  PHE   595      13.140  27.050 -59.260  1.00  0.00
ATOM   5565  CA  PHE   595      13.950  27.450 -57.350  1.00  0.00
ATOM   5566  CB  PHE   595      14.790  26.150 -57.530  1.00  0.00
ATOM   5567  CG  PHE   595      15.950  26.080 -56.580  1.00  0.00
ATOM   5568  CD1 PHE   595      17.160  26.680 -56.860  1.00  0.00
ATOM   5569  CD2 PHE   595      15.850  25.380 -55.410  1.00  0.00
ATOM   5570  CE1 PHE   595      18.210  26.600 -55.980  1.00  0.00
ATOM   5571  CE2 PHE   595      16.890  25.290 -54.520  1.00  0.00
ATOM   5572  CZ  PHE   595      18.080  25.910 -54.800  1.00  0.00
ATOM   5573  C   PHE   595      14.950  28.560 -57.240  1.00  0.00
ATOM   5574  O   PHE   595      15.730  28.790 -58.150  1.00  0.00
ATOM   5575  N   ALA   596      14.890  29.360 -56.150  1.00  0.00
ATOM   5576  HN  ALA   596      14.120  29.250 -55.510  1.00  0.00
ATOM   5577  CA  ALA   596      15.890  30.350 -55.860  1.00  0.00
ATOM   5578  CB  ALA   596      15.350  31.490 -54.980  1.00  0.00
ATOM   5579  C   ALA   596      17.090  29.800 -55.160  1.00  0.00
ATOM   5580  O   ALA   596      18.230  30.070 -55.500  1.00  0.00
ATOM   5581  N   GLY   597      16.900  28.980 -54.120  1.00  0.00
ATOM   5582  HN  GLY   597      15.980  28.650 -53.860  1.00  0.00
ATOM   5583  CA  GLY   597      18.070  28.600 -53.400  1.00  0.00
ATOM   5584  C   GLY   597      17.660  27.830 -52.200  1.00  0.00
ATOM   5585  O   GLY   597      16.500  27.440 -52.050  1.00  0.00
ATOM   5586  N   LEU   598      18.650  27.550 -51.330  1.00  0.00
ATOM   5587  HN  LEU   598      19.590  27.850 -51.540  1.00  0.00
ATOM   5588  CA  LEU   598      18.400  26.840 -50.110  1.00  0.00
ATOM   5589  CB  LEU   598      18.950  25.410 -50.070  1.00  0.00
ATOM   5590  CG  LEU   598      18.210  24.410 -50.970  1.00  0.00
ATOM   5591  CD2 LEU   598      16.690  24.480 -50.750  1.00  0.00
ATOM   5592  CD1 LEU   598      18.780  22.990 -50.780  1.00  0.00
ATOM   5593  C   LEU   598      19.160  27.560 -49.050  1.00  0.00
ATOM   5594  O   LEU   598      20.130  28.260 -49.330  1.00  0.00
ATOM   5595  N   VAL   599      18.700  27.420 -47.790  1.00  0.00
ATOM   5596  HN  VAL   599      17.870  26.880 -47.610  1.00  0.00
ATOM   5597  CA  VAL   599      19.400  28.050 -46.720  1.00  0.00
ATOM   5598  CB  VAL   599      18.700  29.270 -46.180  1.00  0.00
ATOM   5599  CG1 VAL   599      18.750  30.360 -47.260  1.00  0.00
ATOM   5600  CG2 VAL   599      17.270  28.860 -45.790  1.00  0.00
ATOM   5601  C   VAL   599      19.490  27.050 -45.620  1.00  0.00
ATOM   5602  O   VAL   599      18.550  26.300 -45.340  1.00  0.00
ATOM   5603  N   SER   600      20.650  27.030 -44.960  1.00  0.00
ATOM   5604  HN  SER   600      21.370  27.690 -45.220  1.00  0.00
ATOM   5605  CA  SER   600      20.920  26.120 -43.900  1.00  0.00
ATOM   5606  CB  SER   600      22.310  25.480 -44.060  1.00  0.00
ATOM   5607  OG  SER   600      23.320  26.410 -43.740  1.00  0.00
ATOM   5608  HG  SER   600      24.180  26.000 -43.850  1.00  0.00
ATOM   5609  C   SER   600      20.950  26.950 -42.660  1.00  0.00
ATOM   5610  O   SER   600      21.550  28.020 -42.650  1.00  0.00
ATOM   5611  N   MET   601      20.300  26.480 -41.590  1.00  0.00
ATOM   5612  HN  MET   601      19.800  25.600 -41.630  1.00  0.00
ATOM   5613  CA  MET   601      20.310  27.240 -40.380  1.00  0.00
ATOM   5614  CB  MET   601      18.910  27.590 -39.860  1.00  0.00
ATOM   5615  CG  MET   601      18.150  28.580 -40.750  1.00  0.00
ATOM   5616  SD  MET   601      16.490  29.000 -40.140  1.00  0.00
ATOM   5617  CE  MET   601      16.310  30.490 -41.160  1.00  0.00
ATOM   5618  C   MET   601      20.930  26.380 -39.350  1.00  0.00
ATOM   5619  O   MET   601      21.080  25.170 -39.550  1.00  0.00
ATOM   5620  N   ILE   602      21.390  26.980 -38.240  1.00  0.00
ATOM   5621  HN  ILE   602      21.370  27.990 -38.160  1.00  0.00
ATOM   5622  CA  ILE   602      21.900  26.180 -37.180  1.00  0.00
ATOM   5623  CB  ILE   602      23.400  26.080 -37.110  1.00  0.00
ATOM   5624  CG2 ILE   602      23.880  25.350 -38.370  1.00  0.00
ATOM   5625  CG1 ILE   602      24.050  27.460 -36.930  1.00  0.00
ATOM   5626  CD1 ILE   602      23.900  28.340 -38.180  1.00  0.00
ATOM   5627  C   ILE   602      21.370  26.660 -35.880  1.00  0.00
ATOM   5628  O   ILE   602      21.170  27.860 -35.660  1.00  0.00
ATOM   5629  N   ASP   603      21.080  25.700 -34.980  1.00  0.00
ATOM   5630  HN  ASP   603      21.190  24.730 -35.260  1.00  0.00
ATOM   5631  CA  ASP   603      20.620  25.990 -33.660  1.00  0.00
ATOM   5632  CB  ASP   603      19.300  25.250 -33.330  1.00  0.00
ATOM   5633  CG  ASP   603      18.620  25.930 -32.150  1.00  0.00
ATOM   5634  OD1 ASP   603      19.290  26.720 -31.440  1.00  0.00
ATOM   5635  OD2 ASP   603      17.400  25.660 -31.950  1.00  0.00
ATOM   5636  C   ASP   603      21.700  25.450 -32.790  1.00  0.00
ATOM   5637  O   ASP   603      21.680  24.280 -32.400  1.00  0.00
ATOM   5638  N   PRO   604      22.660  26.280 -32.480  1.00  0.00
ATOM   5639  CA  PRO   604      23.830  25.860 -31.760  1.00  0.00
ATOM   5640  CD  PRO   604      22.390  27.700 -32.300  1.00  0.00
ATOM   5641  CB  PRO   604      24.580  27.140 -31.430  1.00  0.00
ATOM   5642  CG  PRO   604      23.450  28.180 -31.300  1.00  0.00
ATOM   5643  C   PRO   604      23.500  25.100 -30.510  1.00  0.00
ATOM   5644  O   PRO   604      22.660  25.550 -29.730  1.00  0.00
ATOM   5645  N   PRO   605      24.140  23.980 -30.300  1.00  0.00
ATOM   5646  CA  PRO   605      23.910  23.270 -29.070  1.00  0.00
ATOM   5647  CD  PRO   605      24.440  23.070 -31.400  1.00  0.00
ATOM   5648  CB  PRO   605      24.500  21.880 -29.280  1.00  0.00
ATOM   5649  CG  PRO   605      24.370  21.660 -30.800  1.00  0.00
ATOM   5650  C   PRO   605      24.540  24.070 -27.990  1.00  0.00
ATOM   5651  O   PRO   605      25.620  24.620 -28.210  1.00  0.00
ATOM   5652  N   ARG   606      23.910  24.130 -26.800  1.00  0.00
ATOM   5653  HN  ARG   606      23.070  23.590 -26.640  1.00  0.00
ATOM   5654  CA  ARG   606      24.430  24.950 -25.750  1.00  0.00
ATOM   5655  CB  ARG   606      23.610  24.870 -24.440  1.00  0.00
ATOM   5656  CG  ARG   606      24.050  25.890 -23.380  1.00  0.00
ATOM   5657  CD  ARG   606      23.700  27.330 -23.760  1.00  0.00
ATOM   5658  NE  ARG   606      22.480  27.740 -23.000  1.00  0.00
ATOM   5659  HE  ARG   606      22.570  28.310 -22.170  1.00  0.00
ATOM   5660  CZ  ARG   606      21.240  27.350 -23.420  1.00  0.00
ATOM   5661  NH1 ARG   606      21.120  26.490 -24.480  1.00  0.00
ATOM   5662 HH11 ARG   606      21.940  26.150 -24.950  1.00  0.00
ATOM   5663 HH12 ARG   606      20.200  26.200 -24.790  1.00  0.00
ATOM   5664  NH2 ARG   606      20.130  27.810 -22.790  1.00  0.00
ATOM   5665 HH21 ARG   606      20.220  28.450 -22.010  1.00  0.00
ATOM   5666 HH22 ARG   606      19.210  27.520 -23.100  1.00  0.00
ATOM   5667  C   ARG   606      25.810  24.460 -25.470  1.00  0.00
ATOM   5668  O   ARG   606      26.080  23.280 -25.660  1.00  0.00
ATOM   5669  N   ALA   607      26.730  25.360 -25.070  1.00  0.00
ATOM   5670  HN  ALA   607      26.460  26.320 -24.920  1.00  0.00
ATOM   5671  CA  ALA   607      28.090  24.960 -24.850  1.00  0.00
ATOM   5672  CB  ALA   607      29.010  26.140 -24.470  1.00  0.00
ATOM   5673  C   ALA   607      28.150  23.970 -23.730  1.00  0.00
ATOM   5674  O   ALA   607      28.900  22.990 -23.800  1.00  0.00
ATOM   5675  N   THR   608      27.360  24.200 -22.670  1.00  0.00
ATOM   5676  HN  THR   608      26.730  24.990 -22.700  1.00  0.00
ATOM   5677  CA  THR   608      27.380  23.380 -21.500  1.00  0.00
ATOM   5678  CB  THR   608      26.560  23.950 -20.390  1.00  0.00
ATOM   5679  OG1 THR   608      26.740  23.200 -19.200  1.00  0.00
ATOM   5680  HG1 THR   608      26.210  23.580 -18.490  1.00  0.00
ATOM   5681  CG2 THR   608      25.080  23.920 -20.810  1.00  0.00
ATOM   5682  C   THR   608      26.840  22.000 -21.780  1.00  0.00
ATOM   5683  O   THR   608      27.350  21.020 -21.240  1.00  0.00
ATOM   5684  N   VAL   609      25.820  21.890 -22.640  1.00  0.00
ATOM   5685  HN  VAL   609      25.510  22.700 -23.160  1.00  0.00
ATOM   5686  CA  VAL   609      25.170  20.620 -22.830  1.00  0.00
ATOM   5687  CB  VAL   609      23.960  20.670 -23.730  1.00  0.00
ATOM   5688  CG1 VAL   609      22.900  21.560 -23.050  1.00  0.00
ATOM   5689  CG2 VAL   609      24.350  21.160 -25.130  1.00  0.00
ATOM   5690  C   VAL   609      26.120  19.550 -23.300  1.00  0.00
ATOM   5691  O   VAL   609      25.880  18.400 -22.930  1.00  0.00
ATOM   5692  N   PRO   610      27.160  19.770 -24.080  1.00  0.00
ATOM   5693  CA  PRO   610      27.950  18.670 -24.540  1.00  0.00
ATOM   5694  CD  PRO   610      27.340  20.930 -24.920  1.00  0.00
ATOM   5695  CB  PRO   610      29.010  19.250 -25.470  1.00  0.00
ATOM   5696  CG  PRO   610      28.310  20.500 -26.030  1.00  0.00
ATOM   5697  C   PRO   610      28.500  17.810 -23.460  1.00  0.00
ATOM   5698  O   PRO   610      28.420  16.590 -23.590  1.00  0.00
ATOM   5699  N   ASP   611      29.080  18.400 -22.410  1.00  0.00
ATOM   5700  HN  ASP   611      29.140  19.410 -22.380  1.00  0.00
ATOM   5701  CA  ASP   611      29.630  17.650 -21.320  1.00  0.00
ATOM   5702  CB  ASP   611      30.540  18.510 -20.420  1.00  0.00
ATOM   5703  CG  ASP   611      31.330  17.570 -19.530  1.00  0.00
ATOM   5704  OD1 ASP   611      31.080  16.340 -19.600  1.00  0.00
ATOM   5705  OD2 ASP   611      32.210  18.070 -18.780  1.00  0.00
ATOM   5706  C   ASP   611      28.520  17.120 -20.460  1.00  0.00
ATOM   5707  O   ASP   611      28.580  16.000 -19.960  1.00  0.00
ATOM   5708  N   ALA   612      27.460  17.930 -20.310  1.00  0.00
ATOM   5709  HN  ALA   612      27.410  18.780 -20.850  1.00  0.00
ATOM   5710  CA  ALA   612      26.380  17.620 -19.410  1.00  0.00
ATOM   5711  CB  ALA   612      25.250  18.660 -19.470  1.00  0.00
ATOM   5712  C   ALA   612      25.810  16.310 -19.790  1.00  0.00
ATOM   5713  O   ALA   612      25.430  15.510 -18.940  1.00  0.00
ATOM   5714  N   VAL   613      25.710  16.050 -21.110  1.00  0.00
ATOM   5715  HN  VAL   613      26.010  16.740 -21.780  1.00  0.00
ATOM   5716  CA  VAL   613      25.180  14.800 -21.550  1.00  0.00
ATOM   5717  CB  VAL   613      25.120  14.700 -23.040  1.00  0.00
ATOM   5718  CG1 VAL   613      24.640  13.290 -23.430  1.00  0.00
ATOM   5719  CG2 VAL   613      24.220  15.840 -23.570  1.00  0.00
ATOM   5720  C   VAL   613      26.070  13.700 -21.060  1.00  0.00
ATOM   5721  O   VAL   613      25.590  12.700 -20.520  1.00  0.00
ATOM   5722  N   LEU   614      27.400  13.860 -21.210  1.00  0.00
ATOM   5723  HN  LEU   614      27.770  14.720 -21.580  1.00  0.00
ATOM   5724  CA  LEU   614      28.280  12.790 -20.830  1.00  0.00
ATOM   5725  CB  LEU   614      29.750  12.990 -21.220  1.00  0.00
ATOM   5726  CG  LEU   614      30.010  12.770 -22.720  1.00  0.00
ATOM   5727  CD2 LEU   614      31.510  12.660 -23.020  1.00  0.00
ATOM   5728  CD1 LEU   614      29.290  13.810 -23.590  1.00  0.00
ATOM   5729  C   LEU   614      28.180  12.520 -19.370  1.00  0.00
ATOM   5730  O   LEU   614      28.210  11.360 -18.950  1.00  0.00
ATOM   5731  N   LYS   615      28.010  13.560 -18.540  1.00  0.00
ATOM   5732  HN  LYS   615      27.920  14.490 -18.930  1.00  0.00
ATOM   5733  CA  LYS   615      27.960  13.380 -17.120  1.00  0.00
ATOM   5734  CB  LYS   615      27.600  14.670 -16.370  1.00  0.00
ATOM   5735  CG  LYS   615      28.610  15.810 -16.530  1.00  0.00
ATOM   5736  CD  LYS   615      28.030  17.170 -16.110  1.00  0.00
ATOM   5737  CE  LYS   615      29.040  18.320 -16.130  1.00  0.00
ATOM   5738  NZ  LYS   615      29.910  18.260 -14.940  1.00  0.00
ATOM   5739  HZ1 LYS   615      29.350  18.340 -14.100  1.00  0.00
ATOM   5740  HZ2 LYS   615      30.420  17.380 -14.930  1.00  0.00
ATOM   5741  HZ3 LYS   615      30.580  19.030 -14.960  1.00  0.00
ATOM   5742  C   LYS   615      26.860  12.420 -16.820  1.00  0.00
ATOM   5743  O   LYS   615      27.000  11.510 -15.990  1.00  0.00
ATOM   5744  N   CYS   616      25.720  12.570 -17.510  1.00  0.00
ATOM   5745  HN  CYS   616      25.670  13.290 -18.220  1.00  0.00
ATOM   5746  CA  CYS   616      24.590  11.740 -17.280  1.00  0.00
ATOM   5747  CB  CYS   616      23.390  12.120 -18.160  1.00  0.00
ATOM   5748  SG  CYS   616      22.820  13.820 -17.830  1.00  0.00
ATOM   5749  C   CYS   616      24.960  10.330 -17.590  1.00  0.00
ATOM   5750  O   CYS   616      24.470   9.410 -16.960  1.00  0.00
ATOM   5751  N   ARG   617      25.810  10.120 -18.610  1.00  0.00
ATOM   5752  HN  ARG   617      26.180  10.900 -19.130  1.00  0.00
ATOM   5753  CA  ARG   617      26.170   8.780 -18.950  1.00  0.00
ATOM   5754  CB  ARG   617      27.050   8.730 -20.210  1.00  0.00
ATOM   5755  CG  ARG   617      26.400   9.420 -21.410  1.00  0.00
ATOM   5756  CD  ARG   617      25.250   8.650 -22.070  1.00  0.00
ATOM   5757  NE  ARG   617      24.010   8.880 -21.280  1.00  0.00
ATOM   5758  HE  ARG   617      24.070   8.950 -20.270  1.00  0.00
ATOM   5759  CZ  ARG   617      22.810   9.010 -21.910  1.00  0.00
ATOM   5760  NH1 ARG   617      22.720   8.980 -23.270  1.00  0.00
ATOM   5761 HH11 ARG   617      23.550   8.860 -23.830  1.00  0.00
ATOM   5762 HH12 ARG   617      21.820   9.070 -23.720  1.00  0.00
ATOM   5763  NH2 ARG   617      21.680   9.160 -21.150  1.00  0.00
ATOM   5764 HH21 ARG   617      21.750   9.180 -20.150  1.00  0.00
ATOM   5765 HH22 ARG   617      20.780   9.250 -21.610  1.00  0.00
ATOM   5766  C   ARG   617      26.930   8.190 -17.800  1.00  0.00
ATOM   5767  O   ARG   617      26.680   7.050 -17.400  1.00  0.00
ATOM   5768  N   THR   618      27.880   8.950 -17.210  1.00  0.00
ATOM   5769  HN  THR   618      28.050   9.890 -17.550  1.00  0.00
ATOM   5770  CA  THR   618      28.650   8.440 -16.110  1.00  0.00
ATOM   5771  CB  THR   618      29.750   9.360 -15.650  1.00  0.00
ATOM   5772  OG1 THR   618      29.220  10.560 -15.110  1.00  0.00
ATOM   5773  HG1 THR   618      29.940  11.120 -14.820  1.00  0.00
ATOM   5774  CG2 THR   618      30.670   9.670 -16.850  1.00  0.00
ATOM   5775  C   THR   618      27.720   8.220 -14.960  1.00  0.00
ATOM   5776  O   THR   618      27.800   7.220 -14.250  1.00  0.00
ATOM   5777  N   ALA   619      26.800   9.180 -14.770  1.00  0.00
ATOM   5778  HN  ALA   619      26.800   9.960 -15.410  1.00  0.00
ATOM   5779  CA  ALA   619      25.800   9.200 -13.730  1.00  0.00
ATOM   5780  CB  ALA   619      24.970  10.500 -13.730  1.00  0.00
ATOM   5781  C   ALA   619      24.860   8.050 -13.920  1.00  0.00
ATOM   5782  O   ALA   619      24.150   7.660 -13.000  1.00  0.00
ATOM   5783  N   GLY   620      24.750   7.530 -15.160  1.00  0.00
ATOM   5784  HN  GLY   620      25.260   7.930 -15.920  1.00  0.00
ATOM   5785  CA  GLY   620      23.880   6.410 -15.370  1.00  0.00
ATOM   5786  C   GLY   620      22.500   6.940 -15.560  1.00  0.00
ATOM   5787  O   GLY   620      21.520   6.200 -15.460  1.00  0.00
ATOM   5788  N   ILE   621      22.400   8.250 -15.840  1.00  0.00
ATOM   5789  HN  ILE   621      23.240   8.810 -15.910  1.00  0.00
ATOM   5790  CA  ILE   621      21.130   8.880 -16.040  1.00  0.00
ATOM   5791  CB  ILE   621      21.070  10.290 -15.520  1.00  0.00
ATOM   5792  CG2 ILE   621      19.730  10.900 -15.980  1.00  0.00
ATOM   5793  CG1 ILE   621      21.270  10.320 -14.000  1.00  0.00
ATOM   5794  CD1 ILE   621      21.480  11.730 -13.460  1.00  0.00
ATOM   5795  C   ILE   621      20.930   8.980 -17.520  1.00  0.00
ATOM   5796  O   ILE   621      21.740   9.560 -18.240  1.00  0.00
ATOM   5797  N   ARG   622      19.830   8.370 -18.010  1.00  0.00
ATOM   5798  HN  ARG   622      19.190   7.900 -17.380  1.00  0.00
ATOM   5799  CA  ARG   622      19.540   8.390 -19.410  1.00  0.00
ATOM   5800  CB  ARG   622      18.580   7.280 -19.870  1.00  0.00
ATOM   5801  CG  ARG   622      18.310   7.340 -21.370  1.00  0.00
ATOM   5802  CD  ARG   622      17.200   6.380 -21.830  1.00  0.00
ATOM   5803  NE  ARG   622      15.990   6.650 -21.010  1.00  0.00
ATOM   5804  HE  ARG   622      16.090   7.080 -20.100  1.00  0.00
ATOM   5805  CZ  ARG   622      14.750   6.310 -21.460  1.00  0.00
ATOM   5806  NH1 ARG   622      14.590   5.750 -22.690  1.00  0.00
ATOM   5807 HH11 ARG   622      15.400   5.580 -23.280  1.00  0.00
ATOM   5808 HH12 ARG   622      13.670   5.490 -23.020  1.00  0.00
ATOM   5809  NH2 ARG   622      13.660   6.530 -20.670  1.00  0.00
ATOM   5810 HH21 ARG   622      13.770   6.940 -19.750  1.00  0.00
ATOM   5811 HH22 ARG   622      12.740   6.270 -21.000  1.00  0.00
ATOM   5812  C   ARG   622      18.910   9.700 -19.780  1.00  0.00
ATOM   5813  O   ARG   622      18.240  10.340 -18.970  1.00  0.00
ATOM   5814  N   VAL   623      19.130  10.130 -21.040  1.00  0.00
ATOM   5815  HN  VAL   623      19.700   9.560 -21.650  1.00  0.00
ATOM   5816  CA  VAL   623      18.600  11.360 -21.540  1.00  0.00
ATOM   5817  CB  VAL   623      19.690  12.330 -21.900  1.00  0.00
ATOM   5818  CG1 VAL   623      19.080  13.470 -22.710  1.00  0.00
ATOM   5819  CG2 VAL   623      20.340  12.830 -20.610  1.00  0.00
ATOM   5820  C   VAL   623      17.880  11.070 -22.810  1.00  0.00
ATOM   5821  O   VAL   623      18.430  10.470 -23.740  1.00  0.00
ATOM   5822  N   ILE   624      16.620  11.520 -22.900  1.00  0.00
ATOM   5823  HN  ILE   624      16.210  12.010 -22.120  1.00  0.00
ATOM   5824  CA  ILE   624      15.830  11.320 -24.080  1.00  0.00
ATOM   5825  CB  ILE   624      14.480  10.720 -23.810  1.00  0.00
ATOM   5826  CG2 ILE   624      13.750  10.610 -25.160  1.00  0.00
ATOM   5827  CG1 ILE   624      14.600   9.380 -23.080  1.00  0.00
ATOM   5828  CD1 ILE   624      13.270   8.880 -22.530  1.00  0.00
ATOM   5829  C   ILE   624      15.540  12.690 -24.600  1.00  0.00
ATOM   5830  O   ILE   624      15.120  13.570 -23.840  1.00  0.00
ATOM   5831  N   MET   625      15.770  12.930 -25.900  1.00  0.00
ATOM   5832  HN  MET   625      16.100  12.200 -26.510  1.00  0.00
ATOM   5833  CA  MET   625      15.520  14.250 -26.430  1.00  0.00
ATOM   5834  CB  MET   625      16.600  14.750 -27.410  1.00  0.00
ATOM   5835  CG  MET   625      16.380  16.210 -27.810  1.00  0.00
ATOM   5836  SD  MET   625      17.610  16.890 -28.970  1.00  0.00
ATOM   5837  CE  MET   625      16.900  16.130 -30.460  1.00  0.00
ATOM   5838  C   MET   625      14.220  14.260 -27.180  1.00  0.00
ATOM   5839  O   MET   625      13.940  13.400 -28.010  1.00  0.00
ATOM   5840  N   VAL   626      13.380  15.280 -26.890  1.00  0.00
ATOM   5841  HN  VAL   626      13.630  15.940 -26.160  1.00  0.00
ATOM   5842  CA  VAL   626      12.150  15.420 -27.600  1.00  0.00
ATOM   5843  CB  VAL   626      10.960  15.540 -26.690  1.00  0.00
ATOM   5844  CG1 VAL   626       9.710  15.810 -27.540  1.00  0.00
ATOM   5845  CG2 VAL   626      10.870  14.260 -25.850  1.00  0.00
ATOM   5846  C   VAL   626      12.250  16.680 -28.400  1.00  0.00
ATOM   5847  O   VAL   626      12.440  17.760 -27.840  1.00  0.00
ATOM   5848  N   THR   627      12.140  16.570 -29.740  1.00  0.00
ATOM   5849  HN  THR   627      11.970  15.670 -30.160  1.00  0.00
ATOM   5850  CA  THR   627      12.270  17.740 -30.560  1.00  0.00
ATOM   5851  CB  THR   627      13.670  17.930 -31.090  1.00  0.00
ATOM   5852  OG1 THR   627      13.750  19.150 -31.810  1.00  0.00
ATOM   5853  HG1 THR   627      14.650  19.270 -32.140  1.00  0.00
ATOM   5854  CG2 THR   627      14.020  16.750 -32.000  1.00  0.00
ATOM   5855  C   THR   627      11.360  17.660 -31.750  1.00  0.00
ATOM   5856  O   THR   627      10.930  16.580 -32.170  1.00  0.00
ATOM   5857  N   GLY   628      11.030  18.840 -32.300  1.00  0.00
ATOM   5858  HN  GLY   628      11.420  19.660 -31.850  1.00  0.00
ATOM   5859  CA  GLY   628      10.200  19.100 -33.450  1.00  0.00
ATOM   5860  C   GLY   628      10.870  18.650 -34.710  1.00  0.00
ATOM   5861  O   GLY   628      10.210  18.410 -35.720  1.00  0.00
ATOM   5862  N   ASP   629      12.220  18.580 -34.710  1.00  0.00
ATOM   5863  HN  ASP   629      12.710  18.750 -33.850  1.00  0.00
ATOM   5864  CA  ASP   629      12.970  18.280 -35.900  1.00  0.00
ATOM   5865  CB  ASP   629      14.480  18.140 -35.640  1.00  0.00
ATOM   5866  CG  ASP   629      15.060  19.520 -35.350  1.00  0.00
ATOM   5867  OD1 ASP   629      14.880  20.420 -36.220  1.00  0.00
ATOM   5868  OD2 ASP   629      15.670  19.700 -34.270  1.00  0.00
ATOM   5869  C   ASP   629      12.520  16.980 -36.480  1.00  0.00
ATOM   5870  O   ASP   629      12.030  16.090 -35.790  1.00  0.00
ATOM   5871  N   HIS   630      12.680  16.880 -37.810  1.00  0.00
ATOM   5872  HN  HIS   630      13.060  17.660 -38.320  1.00  0.00
ATOM   5873  CA  HIS   630      12.320  15.700 -38.550  1.00  0.00
ATOM   5874  ND1 HIS   630      10.810  14.380 -41.100  1.00  0.00
ATOM   5875  CG  HIS   630      12.130  14.760 -40.930  1.00  0.00
ATOM   5876  CB  HIS   630      12.570  15.890 -40.060  1.00  0.00
ATOM   5877  NE2 HIS   630      12.030  12.980 -42.310  1.00  0.00
ATOM   5878  HE2 HIS   630      12.300  12.220 -42.930  1.00  0.00
ATOM   5879  CD2 HIS   630      12.860  13.890 -41.680  1.00  0.00
ATOM   5880  CE1 HIS   630      10.820  13.310 -41.940  1.00  0.00
ATOM   5881  C   HIS   630      13.220  14.620 -38.030  1.00  0.00
ATOM   5882  O   HIS   630      14.340  14.910 -37.610  1.00  0.00
ATOM   5883  N   PRO   631      12.780  13.390 -38.010  1.00  0.00
ATOM   5884  CA  PRO   631      13.570  12.320 -37.480  1.00  0.00
ATOM   5885  CD  PRO   631      11.510  12.950 -38.550  1.00  0.00
ATOM   5886  CB  PRO   631      12.740  11.050 -37.680  1.00  0.00
ATOM   5887  CG  PRO   631      11.690  11.440 -38.750  1.00  0.00
ATOM   5888  C   PRO   631      14.930  12.270 -38.100  1.00  0.00
ATOM   5889  O   PRO   631      15.860  11.910 -37.390  1.00  0.00
ATOM   5890  N   ILE   632      15.080  12.590 -39.400  1.00  0.00
ATOM   5891  HN  ILE   632      14.300  12.890 -39.950  1.00  0.00
ATOM   5892  CA  ILE   632      16.400  12.480 -39.970  1.00  0.00
ATOM   5893  CB  ILE   632      16.420  12.680 -41.460  1.00  0.00
ATOM   5894  CG2 ILE   632      17.870  12.920 -41.890  1.00  0.00
ATOM   5895  CG1 ILE   632      15.770  11.480 -42.160  1.00  0.00
ATOM   5896  CD1 ILE   632      14.300  11.270 -41.800  1.00  0.00
ATOM   5897  C   ILE   632      17.340  13.470 -39.350  1.00  0.00
ATOM   5898  O   ILE   632      18.370  13.080 -38.810  1.00  0.00
ATOM   5899  N   THR   633      16.990  14.770 -39.340  1.00  0.00
ATOM   5900  HN  THR   633      16.100  15.050 -39.740  1.00  0.00
ATOM   5901  CA  THR   633      17.860  15.760 -38.780  1.00  0.00
ATOM   5902  CB  THR   633      17.340  17.160 -38.970  1.00  0.00
ATOM   5903  OG1 THR   633      17.190  17.450 -40.350  1.00  0.00
ATOM   5904  HG1 THR   633      16.860  18.350 -40.450  1.00  0.00
ATOM   5905  CG2 THR   633      18.340  18.140 -38.320  1.00  0.00
ATOM   5906  C   THR   633      17.950  15.510 -37.310  1.00  0.00
ATOM   5907  O   THR   633      18.990  15.730 -36.700  1.00  0.00
ATOM   5908  N   ALA   634      16.850  15.030 -36.700  1.00  0.00
ATOM   5909  HN  ALA   634      16.040  14.780 -37.250  1.00  0.00
ATOM   5910  CA  ALA   634      16.820  14.880 -35.280  1.00  0.00
ATOM   5911  CB  ALA   634      15.490  14.310 -34.770  1.00  0.00
ATOM   5912  C   ALA   634      17.910  13.950 -34.840  1.00  0.00
ATOM   5913  O   ALA   634      18.710  14.300 -33.970  1.00  0.00
ATOM   5914  N   LYS   635      18.040  12.780 -35.480  1.00  0.00
ATOM   5915  HN  LYS   635      17.430  12.570 -36.260  1.00  0.00
ATOM   5916  CA  LYS   635      19.030  11.820 -35.070  1.00  0.00
ATOM   5917  CB  LYS   635      19.060  10.590 -35.990  1.00  0.00
ATOM   5918  CG  LYS   635      20.100   9.530 -35.600  1.00  0.00
ATOM   5919  CD  LYS   635      19.920   8.200 -36.330  1.00  0.00
ATOM   5920  CE  LYS   635      21.090   7.230 -36.130  1.00  0.00
ATOM   5921  NZ  LYS   635      22.290   7.730 -36.830  1.00  0.00
ATOM   5922  HZ1 LYS   635      22.090   7.820 -37.830  1.00  0.00
ATOM   5923  HZ2 LYS   635      22.550   8.640 -36.460  1.00  0.00
ATOM   5924  HZ3 LYS   635      23.060   7.090 -36.700  1.00  0.00
ATOM   5925  C   LYS   635      20.380  12.460 -35.140  1.00  0.00
ATOM   5926  O   LYS   635      21.200  12.330 -34.230  1.00  0.00
ATOM   5927  N   ALA   636      20.650  13.210 -36.230  1.00  0.00
ATOM   5928  HN  ALA   636      19.920  13.370 -36.910  1.00  0.00
ATOM   5929  CA  ALA   636      21.950  13.770 -36.430  1.00  0.00
ATOM   5930  CB  ALA   636      22.040  14.620 -37.710  1.00  0.00
ATOM   5931  C   ALA   636      22.270  14.670 -35.280  1.00  0.00
ATOM   5932  O   ALA   636      23.390  14.660 -34.760  1.00  0.00
ATOM   5933  N   ILE   637      21.280  15.460 -34.830  1.00  0.00
ATOM   5934  HN  ILE   637      20.360  15.370 -35.240  1.00  0.00
ATOM   5935  CA  ILE   637      21.490  16.410 -33.780  1.00  0.00
ATOM   5936  CB  ILE   637      20.230  17.170 -33.470  1.00  0.00
ATOM   5937  CG2 ILE   637      20.520  18.130 -32.290  1.00  0.00
ATOM   5938  CG1 ILE   637      19.750  17.890 -34.750  1.00  0.00
ATOM   5939  CD1 ILE   637      18.310  18.380 -34.670  1.00  0.00
ATOM   5940  C   ILE   637      21.890  15.670 -32.540  1.00  0.00
ATOM   5941  O   ILE   637      22.770  16.120 -31.800  1.00  0.00
ATOM   5942  N   ALA   638      21.250  14.510 -32.280  1.00  0.00
ATOM   5943  HN  ALA   638      20.540  14.190 -32.920  1.00  0.00
ATOM   5944  CA  ALA   638      21.560  13.730 -31.120  1.00  0.00
ATOM   5945  CB  ALA   638      20.660  12.490 -30.990  1.00  0.00
ATOM   5946  C   ALA   638      22.970  13.260 -31.210  1.00  0.00
ATOM   5947  O   ALA   638      23.720  13.320 -30.240  1.00  0.00
ATOM   5948  N   ALA   639      23.380  12.810 -32.400  1.00  0.00
ATOM   5949  HN  ALA   639      22.750  12.830 -33.190  1.00  0.00
ATOM   5950  CA  ALA   639      24.700  12.290 -32.570  1.00  0.00
ATOM   5951  CB  ALA   639      25.000  11.850 -34.020  1.00  0.00
ATOM   5952  C   ALA   639      25.670  13.370 -32.220  1.00  0.00
ATOM   5953  O   ALA   639      26.720  13.110 -31.630  1.00  0.00
ATOM   5954  N   SER   640      25.330  14.620 -32.590  1.00  0.00
ATOM   5955  HN  SER   640      24.450  14.780 -33.050  1.00  0.00
ATOM   5956  CA  SER   640      26.200  15.740 -32.340  1.00  0.00
ATOM   5957  CB  SER   640      25.680  17.040 -32.960  1.00  0.00
ATOM   5958  OG  SER   640      26.580  18.100 -32.690  1.00  0.00
ATOM   5959  HG  SER   640      26.250  18.910 -33.080  1.00  0.00
ATOM   5960  C   SER   640      26.340  15.990 -30.860  1.00  0.00
ATOM   5961  O   SER   640      27.430  16.330 -30.390  1.00  0.00
ATOM   5962  N   VAL   641      25.230  15.860 -30.110  1.00  0.00
ATOM   5963  HN  VAL   641      24.380  15.600 -30.570  1.00  0.00
ATOM   5964  CA  VAL   641      25.190  16.090 -28.680  1.00  0.00
ATOM   5965  CB  VAL   641      23.790  16.170 -28.150  1.00  0.00
ATOM   5966  CG1 VAL   641      23.850  16.400 -26.630  1.00  0.00
ATOM   5967  CG2 VAL   641      23.040  17.270 -28.920  1.00  0.00
ATOM   5968  C   VAL   641      25.870  14.970 -27.950  1.00  0.00
ATOM   5969  O   VAL   641      26.300  15.140 -26.810  1.00  0.00
[truncated: 253,540 more chars]
